# Supplementary material for: Ageing compromises mouse thymus function and remodels epithelial cell differentiation
Source: eLife journal article supplement (doi:10.7554/elife.56221), 2020-08-25
Supplement: supp [file elife-56221-supp-v1.zip]

Archive with 24 entries (24 files):
- elife_poa_e56221_Transparent_Reporting_File.docx
- elife_poa_e56221_Figure_1_figure_supplement_1.pdf
- elife_poa_e56221_Figure_1_figure_supplement_2.pdf
- elife_poa_e56221_Figure_1_figure_supplement_3.pdf
- elife_poa_e56221_Figure_2_figure_supplement_1.pdf
- elife_poa_e56221_Figure_2_figure_supplement_2.pdf
- elife_poa_e56221_Figure_2_figure_supplement_3.pdf
- elife_poa_e56221_Figure_2_figure_supplement_4.pdf
- elife_poa_e56221_Figure_2_figure_supplement_5.pdf
- elife_poa_e56221_Figure_2_figure_supplement_6.pdf
- elife_poa_e56221_Figure_2_figure_supplement_7.pdf
- elife_poa_e56221_Figure_3_figure_supplement_1.pdf
- elife_poa_e56221_Figure_5_figure_supplement_1.pdf
- elife_poa_e56221_Figure_5_figure_supplement_2.pdf
- elife_poa_e56221_Figure_6_figure_supplement_1.pdf
- elife_poa_e56221_Figure_6_figure_supplement_2.pdf
- elife_poa_e56221_Figure_6_figure_supplement_3.pdf
- elife_poa_e56221_Figure_6_figure_supplement_4.pdf
- elife_poa_e56221_Figure_6_figure_supplement_5.pdf
- elife_poa_e56221_Figure_6_figure_supplement_6.pdf
- elife_poa_e56221_Figure_7_figure_supplement_1.pdf
- elife_poa_e56221_Figure_7_figure_supplement_2.pdf
- elife_poa_e56221_Figure_7_figure_supplement_3.pdf
- elife_poa_e56221_Supplementary_file_1.xlsx
