# Supplementary material for: Ageing compromises mouse thymus function and remodels epithelial cell differentiation
Source: eLife journal article supplement (doi:10.7554/elife.56221), 2020-08-25
Supplement: supp [file elife-56221-supp-v1.zip › elife_poa_e56221_Supplementary_file_1.xlsx]

## Sheet: Table1
	Supplementary File 1-table 1: Numbers of TEC isolated from each population
			Age
	Sort Type	Sort conditions	1wk	4wk	16wk	32wk	52wk	sum
	cTEC	CD45-, EpCAM+, Ly51+ CD80-	133	170	73	123	108	607
	mTEClo	CD45-, EpCAM+, Ly51-, CD80lo, MHCIIlo, DSG3-	92	132	93	129	136	582
	mTEChi	CD45-, EpCAM+, Ly51-, CD80hu, MHCIIhi	129	193	99	143	151	715
	DSG3+ mTEClo	CD45-, EpCAM+, Ly51-, CD80lo, MHCIIlo, DSG3+	79	104	53	101	86	423
	sum		433	599	318	496	481	2327

## Sheet: Table2
Supplementary File 1-table 2: Marker genes for each subtype of TEC.
Subtype	GeneID	GeneName	PV(adj)	Chr	Annotation	%NZ within	Mean(Log2) within	%NZ outside	Mean(Log2) outside
nTEC	ENSMUSG00000041261	Car8	7.95937e-307	4	Unknown	90	9.65233	1.6108	2.78193
nTEC	ENSMUSG00000025196	Cpn1	8.98537e-246	19	Unknown	80	8.50917	1.6108	2.32083
nTEC	ENSMUSG00000022829	Stxbp5l	7.15835e-236	16	Unknown	86.6667	9.43515	3.04745	2.06034
nTEC	ENSMUSG00000073208	Speer4c	8.88134e-197	5	Unknown	56.6667	8.51059	2.13322	1.69642
nTEC	ENSMUSG00000052212	Cd177	2.60804e-193	7	Unknown	63.3333	10.9175	2.26382	2.49049
nTEC	ENSMUSG00000049154	Fam183b	2.86004e-148	11	Unknown	70	7.58878	2.65564	2.48962
nTEC	ENSMUSG00000071551	Akr1c19	7.35727e-146	13	Unknown	90	9.00506	5.00653	3.935
nTEC	ENSMUSG00000053182	Gm609	1.88121e-138	16	Unknown	70	6.06799	1.78494	1.8498
nTEC	ENSMUSG00000027273	Snap25	1.36819e-137	2	Unknown	76.6667	8.38701	4.44057	2.38643
nTEC	ENSMUSG00000037033	Clca4	1.16982e-120	3	Unknown	70	10.5018	6.66086	3.56734
nTEC	ENSMUSG00000038807	Rap1gap2	8.72693e-96	11	Unknown	90	6.61537	5.57249	2.69365
nTEC	ENSMUSG00000031144	Syp	3.90445e-92	X	Unknown	63.3333	5.41965	3.26513	1.4458
nTEC	ENSMUSG00000021194	Chga	1.92271e-91	12	Unknown	80	11.1993	8.27166	8.16865
nTEC	ENSMUSG00000085081	A430071A18Rik	3.27943e-87	11	Unknown	43.3333	6.83995	2.35089	1.38821
nTEC	ENSMUSG00000040891	Foxa3	2.03708e-81	7	Transcription_Factor	60	5.41359	2.35089	1.31856
nTEC	ENSMUSG00000043668	Tox3	1.56904e-80	8	Unknown	76.6667	5.72333	4.87593	1.69545
nTEC	ENSMUSG00000056553	Ptprn2	9.78577e-80	12	Unknown	86.6667	7.57924	7.83631	3.18039
nTEC	ENSMUSG00000040118	Cacna2d1	1.60148e-78	5	Unknown	83.3333	8.63224	12.4075	3.60981
nTEC	ENSMUSG00000068196	Col8a1	3.93836e-75	16	Unknown	50	6.89438	3.04745	1.97411
nTEC	ENSMUSG00000057182	Scn3a	3.01878e-74	2	Unknown	66.6667	6.40866	5.0936	2.51202
nTEC	ENSMUSG00000018822	Sfrp5	2.91456e-73	19	Unknown	76.6667	8.09184	5.74663	3.77765
nTEC	ENSMUSG00000006575	Rundc3a	5.93085e-71	11	Unknown	63.3333	5.5328	4.17936	1.63795
nTEC	ENSMUSG00000028699	Tspan1	4.44808e-69	4	Unknown	86.6667	9.95345	9.27296	6.03866
nTEC	ENSMUSG00000058396	Gpr182	1.05626e-66	10	Unknown	53.3333	7.43655	3.30866	2.82596
nTEC	ENSMUSG00000078670	Fam174b	1.91734e-66	7	Unknown	66.6667	7.44088	6.39965	2.94553
nTEC	ENSMUSG00000001930	Vwf	1.40652e-64	6	Unknown	70	8.15995	6.22551	2.96169
nTEC	ENSMUSG00000026347	Tmem163	1.04955e-63	1	Unknown	63.3333	6.04307	3.65694	2.65149
nTEC	ENSMUSG00000036295	Lrrn3	2.70054e-63	12	Unknown	46.6667	6.3281	2.26382	1.90741
nTEC	ENSMUSG00000078963	Hsbp1l1	7.91827e-62	18	Unknown	56.6667	5.42656	3.70048	1.60161
nTEC	ENSMUSG00000063903	Klk1	4.95332e-60	7	Unknown	66.6667	9.96261	4.48411	5.73792
nTEC	ENSMUSG00000058975	Kcnc1	8.78481e-59	7	Cell_Surface	56.6667	5.65191	2.82978	1.92561
nTEC	ENSMUSG00000030110	Ret	1.07619e-57	6	Unknown	63.3333	5.80884	4.39704	2.25565
nTEC	ENSMUSG00000021213	Akr1c13	4.76029e-57	13	Unknown	96.6667	8.76108	14.1489	5.31913
nTEC	ENSMUSG00000005803	Sqrdl	6.8792e-57	2	Unknown	86.6667	8.32794	11.5368	4.74431
nTEC	ENSMUSG00000063704	Mapk15	1.92796e-56	15	Unknown	86.6667	7.65902	12.0592	3.66449
nTEC	ENSMUSG00000028137	Celf3	6.33335e-56	3	Unknown	80	6.11171	6.48672	2.77371
nTEC	ENSMUSG00000000686	Abhd15	8.72273e-55	11	Unknown	60	5.27908	4.52764	1.44135
nTEC	ENSMUSG00000054169	Ceacam10	4.11138e-53	7	Unknown	76.6667	10.6971	12.8864	5.18821
nTEC	ENSMUSG00000096146	Kcnj11	4.41042e-53	7	Unknown	53.3333	5.06919	2.69917	1.39239
nTEC	ENSMUSG00000033740	St18	1.64548e-51	1	Transcription_Factor	56.6667	6.41665	3.43927	2.42063
nTEC	ENSMUSG00000025867	Cplx2	2.43172e-51	13	Unknown	100	8.67495	36.9613	4.14352
nTEC	ENSMUSG00000074240	Cib3	1.60898e-50	8	Unknown	63.3333	7.95399	6.22551	3.94905
nTEC	ENSMUSG00000021211	Akr1c12	2.55714e-50	13	Unknown	90	7.61662	10.1437	4.2896
nTEC	ENSMUSG00000040969	Arhgef38	5.94034e-50	3	Unknown	60	5.65854	3.3522	2.01433
nTEC	ENSMUSG00000025738	Fbxl16	7.30241e-50	17	Unknown	53.3333	5.20309	2.04615	1.42262
nTEC	ENSMUSG00000036764	Dnajc12	3.35029e-49	10	Unknown	93.3333	9.30802	18.7636	4.91363
nTEC	ENSMUSG00000047040	Prr15l	1.96449e-47	11	Unknown	70	8.204	7.74924	4.57524
nTEC	ENSMUSG00000079436	Kcnj13	3.11574e-47	1	Unknown	40	6.21515	3.39573	2.87438
nTEC	ENSMUSG00000074344	Adora3	3.40995e-46	3	Unknown	50	6.45949	3.87462	2.29934
nTEC	ENSMUSG00000028356	Ambp	3.77906e-46	4	Cell_Surface	40	6.91422	2.00261	3.54887
nTEC	ENSMUSG00000050212	Eva1b	6.09947e-46	4	Unknown	83.3333	6.8932	10.3178	3.80694
nTEC	ENSMUSG00000031980	Agt	2.92795e-45	8	Unknown	56.6667	7.59235	3.61341	4.61766
nTEC	ENSMUSG00000006546	Cryba2	6.12484e-45	1	Unknown	60	6.42612	4.70178	4.01065
nTEC	ENSMUSG00000010175	Prox1	7.43724e-45	1	Transcription_Factor	56.6667	5.56172	4.17936	2.18984
nTEC	ENSMUSG00000033061	Resp18	2.15778e-44	1	Unknown	80	10.1501	11.9286	6.52573
nTEC	ENSMUSG00000061718	Ppp1r1b	7.11033e-44	11	Unknown	60	7.95613	6.87854	3.57119
nTEC	ENSMUSG00000038009	Dnajc22	1.53207e-43	15	Unknown	50	6.15093	4.13583	2.43301
nTEC	ENSMUSG00000037159	Wee2	4.43333e-43	6	Unknown	46.6667	5.9095	4.2229	2.48651
nTEC	ENSMUSG00000022696	Sidt1	2.36054e-42	16	Unknown	43.3333	5.39411	2.82978	1.76708
nTEC	ENSMUSG00000024743	Syt7	8.59461e-42	19	Unknown	70	6.3801	8.70701	3.02295
nTEC	ENSMUSG00000040170	Fmo2	1.57308e-41	1	Unknown	53.3333	7.27362	3.83108	4.40056
nTEC	ENSMUSG00000072115	Ang	7.02718e-41	14	Unknown	93.3333	8.13535	16.761	5.31183
nTEC	ENSMUSG00000062995	Ica1	2.7582e-40	6	Unknown	86.6667	7.38995	15.4114	4.25748
nTEC	ENSMUSG00000020182	Ddc	1.02277e-39	11	Unknown	60	7.31866	5.70309	3.79091
nTEC	ENSMUSG00000048442	Smim5	1.58482e-39	11	Unknown	63.3333	6.43871	6.61733	3.43083
nTEC	ENSMUSG00000006586	Runx1t1	7.78532e-39	4	Transcription_Factor	50	6.93843	5.92077	2.64058
nTEC	ENSMUSG00000047904	Sstr2	1.99292e-38	11	Unknown	56.6667	6.83179	4.39704	3.41192
nTEC	ENSMUSG00000075420	Smim6	4.58703e-38	11	Unknown	63.3333	6.45428	6.35612	3.61185
nTEC	ENSMUSG00000044156	Hepacam2	8.33054e-37	6	Unknown	56.6667	7.60684	4.963	4.8114
nTEC	ENSMUSG00000045287	Rtn4rl1	1.09849e-36	11	Cell_Surface	66.6667	5.86302	6.92207	2.61684
nTEC	ENSMUSG00000031748	Gnao1	2.03925e-35	8	Unknown	53.3333	5.54602	5.39835	2.36496
nTEC	ENSMUSG00000091956	C2cd4b	1.05991e-34	9	Unknown	73.3333	8.63752	10.9273	4.7147
nTEC	ENSMUSG00000006435	Neurl1a	1.28743e-34	19	Unknown	60	5.91169	5.26774	2.50973
nTEC	ENSMUSG00000101483	NA	7.95054e-34	NA	Unknown	53.3333	6.2441	5.70309	2.75126
nTEC	ENSMUSG00000040412	5330417C22Rik	1.75497e-33	3	Unknown	96.6667	8.27559	21.8981	5.08205
nTEC	ENSMUSG00000035451	Foxa1	1.24069e-32	12	Transcription_Factor	66.6667	7.07062	10.4919	3.7335
nTEC	ENSMUSG00000021263	Degs2	3.93498e-32	12	Unknown	60	8.23147	7.31389	4.75082
nTEC	ENSMUSG00000068617	Efcab1	5.00858e-32	16	Unknown	50	6.44088	5.44188	3.37217
nTEC	ENSMUSG00000020788	Atp2a3	1.0952e-31	11	Unknown	83.3333	8.02534	16.4127	5.22661
nTEC	ENSMUSG00000046447	Camk2n1	1.37614e-30	4	Unknown	73.3333	5.84162	9.79539	3.34483
nTEC	ENSMUSG00000039126	Prune2	5.12965e-30	19	Unknown	80	8.31042	14.9761	5.90563
nTEC	ENSMUSG00000023236	Scg5	1.64216e-28	2	Unknown	90	9.677	23.2042	6.22197
nTEC	ENSMUSG00000026691	Fmo3	1.64702e-28	1	Unknown	33.3333	7.37975	2.04615	3.78263
nTEC	ENSMUSG00000034586	Hid1	2.38089e-28	11	Unknown	50	5.4516	4.83239	2.5015
nTEC	ENSMUSG00000006651	Aplp1	9.30681e-28	7	Unknown	90	7.21231	18.5895	4.46248
nTEC	ENSMUSG00000021749	Oit1	1.12499e-27	14	Unknown	86.6667	8.51555	16.2821	6.0208
nTEC	ENSMUSG00000032010	Usp2	1.50112e-27	9	Unknown	60	6.04943	8.70701	3.28843
nTEC	ENSMUSG00000038112	AW551984	1.30342e-26	9	Unknown	36.6667	6.47158	3.74401	2.50053
nTEC	ENSMUSG00000068011	2510049J12Rik	4.60363e-26	6	Unknown	86.6667	7.7774	18.6765	5.51191
nTEC	ENSMUSG00000019779	Frk	5.68165e-26	10	Unknown	80	6.83342	12.2333	4.10521
nTEC	ENSMUSG00000039347	Atp6v0e2	9.984e-26	6	Unknown	80	7.7781	15.9774	4.82436
nTEC	ENSMUSG00000047907	Tshz2	1.39291e-25	2	Unknown	83.3333	6.78476	16.3256	4.09519
nTEC	ENSMUSG00000039438	Ttc36	2.0087e-25	9	Unknown	73.3333	7.07047	10.2743	4.83838
nTEC	ENSMUSG00000037196	Pacrg	6.64504e-25	17	Unknown	50	6.08328	7.22682	3.23427
nTEC	ENSMUSG00000003411	Rab3b	9.37955e-25	4	Unknown	33.3333	5.96457	2.52503	3.50908
nTEC	ENSMUSG00000079013	Serpina3j	9.37955e-25	12	Unknown	43.3333	8.36195	5.8337	4.22601
nTEC	ENSMUSG00000009394	Syn2	9.37955e-25	6	Unknown	83.3333	7.10002	16.0644	4.96435
nTEC	ENSMUSG00000005268	Prlr	2.89883e-24	15	Cell_Surface	66.6667	6.99223	12.1027	4.05855
nTEC	ENSMUSG00000037172	E330009J07Rik	3.46362e-24	6	Unknown	70	6.85953	16.1515	4.05704
nTEC	ENSMUSG00000020098	Pcbd1	4.4576e-24	10	Unknown	80	7.14319	17.1093	4.59672
nTEC	ENSMUSG00000045502	Niacr1	5.0096e-24	5	Unknown	50	6.76725	5.57249	4.47525
nTEC	ENSMUSG00000056895	Hist3h2ba	5.25062e-24	11	Unknown	53.3333	5.14253	5.8337	2.54276
nTEC	ENSMUSG00000047228	BC048546	2.5546e-23	6	Unknown	43.3333	5.80103	3.70048	3.04445
nTEC	ENSMUSG00000020263	Appl2	4.99292e-23	10	Unknown	80	7.1425	19.1554	4.73854
nTEC	ENSMUSG00000017204	Gsdma	5.06166e-23	11	Unknown	50	7.62864	5.87723	4.642
nTEC	ENSMUSG00000026175	Vil1	5.68709e-23	1	Unknown	60	6.88621	8.35873	3.75463
nTEC	ENSMUSG00000042515	Mum1l1	8.81665e-23	X	Unknown	56.6667	6.57288	10.5355	3.96767
nTEC	ENSMUSG00000037887	Dusp8	1.5812e-22	7	Unknown	53.3333	6.5663	8.92468	3.89933
nTEC	ENSMUSG00000017943	Gdap1l1	5.27734e-22	2	Unknown	76.6667	6.84494	14.9325	4.45352
nTEC	ENSMUSG00000047180	Neurl3	6.093e-22	1	Unknown	53.3333	6.86686	5.92077	3.80699
nTEC	ENSMUSG00000041798	Gck	9.61982e-22	11	Unknown	50	5.48762	5.65956	2.94843
nTEC	ENSMUSG00000020847	Rph3al	1.48758e-21	11	Unknown	73.3333	5.53018	12.0592	3.10114
nTEC	ENSMUSG00000041681	Iapp	1.718e-21	6	Unknown	40	10.3181	6.22551	5.70716
nTEC	ENSMUSG00000022419	Deptor	3.03397e-21	15	Unknown	96.6667	7.71756	27.6448	6.07362
nTEC	ENSMUSG00000087047	1700110K17Rik	1.80511e-20	9	Unknown	43.3333	5.6265	4.39704	2.83354
nTEC	ENSMUSG00000049721	Gal3st1	2.4179e-20	11	Unknown	43.3333	5.61317	3.91815	2.85462
nTEC	ENSMUSG00000020911	Krt19	3.18176e-20	11	Unknown	76.6667	8.22631	14.6713	6.54661
nTEC	ENSMUSG00000008035	Mid1ip1	3.65765e-20	X	Unknown	80	7.3445	18.2412	4.71176
nTEC	ENSMUSG00000055978	Fut2	3.68901e-20	7	Unknown	50	6.6781	9.70832	3.89255
nTEC	ENSMUSG00000027950	Chrnb2	3.93066e-20	3	Unknown	63.3333	5.44329	7.83631	3.16992
nTEC	ENSMUSG00000033022	Cdo1	1.27565e-19	18	Unknown	83.3333	9.34639	24.3361	7.24657
nTEC	ENSMUSG00000026442	Nfasc	1.5009e-19	1	Unknown	86.6667	7.07056	21.2016	4.67298
nTEC	ENSMUSG00000070473	Cldn3	2.45642e-19	5	Unknown	93.3333	9.49351	26.687	7.50585
nTEC	ENSMUSG00000029086	Prom1	4.54666e-19	5	Cell_Surface	36.6667	5.66961	4.30997	2.94979
nTEC	ENSMUSG00000026399	Cd55	6.02662e-19	1	Cell_Surface	53.3333	7.19108	9.83892	4.19398
nTEC	ENSMUSG00000034353	Ramp1	1.20804e-18	1	Cell_Surface	40	6.66818	5.22421	3.55984
nTEC	ENSMUSG00000068154	Insm1	1.47327e-18	2	Transcription_Factor	76.6667	5.99228	20.2438	3.63514
nTEC	ENSMUSG00000059325	Hopx	1.64687e-18	5	Unknown	70	5.76729	12.2333	3.42876
nTEC	ENSMUSG00000037989	Wnk2	2.28146e-18	13	Unknown	73.3333	6.05035	14.9325	3.78771
nTEC	ENSMUSG00000032207	Lipc	2.78063e-18	9	Unknown	43.3333	7.04384	6.44319	4.36057
nTEC	ENSMUSG00000019987	Arg1	5.03714e-18	10	Unknown	33.3333	6.94019	3.4828	3.27409
nTEC	ENSMUSG00000061322	Dnaic1	3.52514e-17	4	Unknown	36.6667	6.06756	4.83239	3.31175
nTEC	ENSMUSG00000000544	Gpa33	3.53692e-17	1	Unknown	70	6.25851	11.3626	4.24586
nTEC	ENSMUSG00000024112	Cacna1h	3.63774e-17	17	Unknown	53.3333	5.07761	5.65956	2.55045
nTEC	ENSMUSG00000023966	Rsph9	3.89416e-17	17	Unknown	60	6.75318	10.1001	4.45734
nTEC	ENSMUSG00000086054	Gm13824	4.44649e-17	5	Unknown	53.3333	4.67073	8.18459	2.6132
nTEC	ENSMUSG00000001901	Kcnh6	1.05556e-16	11	Unknown	86.6667	7.30181	20.0261	5.07163
nTEC	ENSMUSG00000031840	Rab3a	2.05151e-16	8	Unknown	63.3333	5.60255	12.6687	3.55501
nTEC	ENSMUSG00000041923	Nol4	2.11274e-16	18	Unknown	70	6.26444	18.1106	3.91527
nTEC	ENSMUSG00000020604	Arsg	2.22346e-16	11	Unknown	46.6667	6.46943	10.6226	3.33918
nTEC	ENSMUSG00000026600	Soat1	2.53855e-16	1	Unknown	86.6667	6.62178	27.1659	4.73236
nTEC	ENSMUSG00000078945	Naip2	3.79253e-16	13	Unknown	56.6667	6.00525	10.8838	3.24463
nTEC	ENSMUSG00000037145	2210407C18Rik	4.28174e-16	11	Unknown	50	7.53672	6.66086	5.87299
nTEC	ENSMUSG00000038497	Tmco3	5.01139e-16	8	Unknown	86.6667	7.42559	27.4706	4.98069
nTEC	ENSMUSG00000039485	Tspyl4	6.05494e-16	10	Unknown	50	5.06357	11.1885	2.90304
nTEC	ENSMUSG00000005672	Kit	6.94723e-16	5	Cell_Surface	63.3333	6.12257	14.9761	4.02929
nTEC	ENSMUSG00000032033	Barx2	9.24511e-16	9	Transcription_Factor	46.6667	5.43164	6.26905	3.34639
nTEC	ENSMUSG00000028445	Enho	1.15759e-15	4	Unknown	93.3333	8.85456	34.2621	6.66334
nTEC	ENSMUSG00000000531	Grasp	1.26723e-15	15	Unknown	70	6.82008	20.8533	4.05214
nTEC	ENSMUSG00000078439	2210404O07Rik	2.77707e-15	10	Unknown	70	7.56114	18.3718	5.2697
nTEC	ENSMUSG00000060512	0610040J01Rik	2.77707e-15	5	Unknown	53.3333	6.4007	8.66347	4.08956
nTEC	ENSMUSG00000015222	Map2	9.19084e-15	1	Unknown	90	7.18319	32.6513	5.12005
nTEC	ENSMUSG00000040136	Abcc8	1.06851e-14	7	Unknown	73.3333	7.94906	17.6317	5.07484
nTEC	ENSMUSG00000023452	Pisd	1.22784e-14	5	Unknown	86.6667	7.66738	40.6182	4.99821
nTEC	ENSMUSG00000041608	Entpd3	1.99234e-14	9	Unknown	50	6.25361	6.92207	4.31424
nTEC	ENSMUSG00000046727	Cystm1	2.08221e-14	18	Unknown	100	9.24858	35.0457	7.38767
nTEC	ENSMUSG00000068742	Cry2	2.8296e-14	2	Unknown	66.6667	6.84971	20.3744	4.75947
nTEC	ENSMUSG00000044279	Crb3	4.98977e-14	17	Unknown	86.6667	6.45249	25.0762	4.76993
nTEC	ENSMUSG00000070661	Rnf186	6.97961e-14	4	Unknown	50	6.56815	7.13975	4.89301
nTEC	ENSMUSG00000034570	Inpp5j	7.52365e-14	11	Unknown	43.3333	5.30465	6.53026	2.91004
nTEC	ENSMUSG00000035095	Fam167a	7.82661e-14	14	Unknown	73.3333	6.81333	17.7623	4.64585
nTEC	ENSMUSG00000027947	Il6ra	1.08974e-13	3	Cell_Surface	76.6667	6.79791	22.6382	5.06027
nTEC	ENSMUSG00000021876	Rnase4	1.26048e-13	14	Unknown	96.6667	10.2198	44.2316	8.40279
nTEC	ENSMUSG00000027188	Pamr1	2.00677e-13	2	Unknown	66.6667	7.4106	16.4127	5.34193
nTEC	ENSMUSG00000026417	Pigr	2.01521e-13	1	Unknown	40	8.36628	6.92207	5.59015
nTEC	ENSMUSG00000028943	Espn	2.48509e-13	4	Unknown	86.6667	6.86904	28.4719	5.47246
nTEC	ENSMUSG00000038793	Lefty1	3.05557e-13	1	Unknown	46.6667	5.74123	7.40096	4.56978
nTEC	ENSMUSG00000006362	Cbfa2t3	3.16328e-13	8	Transcription_Factor	83.3333	7.54138	30.5181	5.05062
nTEC	ENSMUSG00000027359	Slc27a2	3.37226e-13	2	Unknown	43.3333	5.58081	7.40096	3.45001
nTEC	ENSMUSG00000039431	Mtmr7	4.6522e-13	8	Unknown	50	5.83264	10.2743	3.8606
nTEC	ENSMUSG00000027220	Syt13	6.15641e-13	2	Unknown	43.3333	5.89013	7.05268	3.51942
nTEC	ENSMUSG00000070802	Pnmal2	7.92709e-13	7	Unknown	76.6667	8.47353	26.0775	6.00566
nTEC	ENSMUSG00000042750	Bex2	8.4317e-13	X	Unknown	73.3333	7.21881	21.158	5.4684
nTEC	ENSMUSG00000053897	Slc39a8	9.91508e-13	3	Unknown	40	6.8655	8.92468	3.30348
nTEC	ENSMUSG00000046782	Ttc6	1.42289e-12	12	Unknown	56.6667	5.16475	9.09882	3.60883
nTEC	ENSMUSG00000021097	Clmn	1.4273e-12	12	Unknown	73.3333	6.45391	17.3705	4.87668
nTEC	ENSMUSG00000036687	Tmem184a	1.69194e-12	5	Unknown	76.6667	8.13262	30.9099	5.86223
nTEC	ENSMUSG00000033427	Upb1	1.84431e-12	10	Unknown	53.3333	6.53703	10.7532	4.77533
nTEC	ENSMUSG00000018569	Cldn7	1.84484e-12	11	Unknown	96.6667	8.94371	35.2634	7.46444
nTEC	ENSMUSG00000008136	Fhl2	2.2907e-12	1	Unknown	50	7.04565	11.4497	5.02503
nTEC	ENSMUSG00000003271	Sult2b1	4.33893e-12	7	Unknown	73.3333	6.53568	16.7175	5.07406
nTEC	ENSMUSG00000054162	Spock3	5.98259e-12	8	Unknown	76.6667	7.87651	22.1593	5.7394
nTEC	ENSMUSG00000022824	Muc13	6.2052e-12	16	Unknown	43.3333	6.10165	5.70309	4.10389
nTEC	ENSMUSG00000039676	Capsl	6.72118e-12	15	Unknown	86.6667	7.79222	34.5233	5.974
nTEC	ENSMUSG00000042460	C1galt1	1.26773e-11	6	Unknown	70	5.08059	17.1093	3.9146
nTEC	ENSMUSG00000005667	Mthfd2	1.49866e-11	6	Unknown	60	6.17925	16.0209	4.19062
nTEC	ENSMUSG00000014077	Chp1	2.0894e-11	2	Unknown	83.3333	7.69213	38.0061	5.71102
nTEC	ENSMUSG00000030683	Sez6l2	2.19757e-11	7	Unknown	66.6667	6.39882	13.67	4.12377
nTEC	ENSMUSG00000064373	Sepp1	2.43275e-11	15	Unknown	80	8.31106	33.1302	6.25211
nTEC	ENSMUSG00000026958	Dpp7	2.62732e-11	2	Unknown	40	5.91156	7.18328	4.33806
nTEC	ENSMUSG00000030838	Ush1c	2.65774e-11	7	Unknown	40	6.29176	6.74793	4.23831
nTEC	ENSMUSG00000019876	Pkib	3.43109e-11	10	Unknown	40	6.13847	6.48672	4.12612
nTEC	ENSMUSG00000078607	1810010H24Rik	3.53564e-11	11	Unknown	50	6.43815	14.5842	4.06059
nTEC	ENSMUSG00000024036	Slc37a1	3.54527e-11	17	Unknown	60	6.52037	16.195	4.26103
nTEC	ENSMUSG00000040929	Rfx3	5.32809e-11	19	Transcription_Factor	63.3333	4.86111	15.6291	3.03808
nTEC	ENSMUSG00000021662	Arhgef28	7.35544e-11	13	Unknown	83.3333	6.93979	29.3426	5.37712
nTEC	ENSMUSG00000032285	Dnaja4	8.2374e-11	9	Unknown	63.3333	5.83554	18.633	4.02392
nTEC	ENSMUSG00000098557	KCTD12	8.44092e-11	14	Unknown	83.3333	6.40505	28.2978	4.88946
nTEC	ENSMUSG00000044788	Fads6	9.31588e-11	11	Unknown	50	6.02888	9.92599	3.69527
nTEC	ENSMUSG00000002265	Peg3	9.49592e-11	7	Transcription_Factor	50	6.89382	12.3204	4.19341
nTEC	ENSMUSG00000023033	Scn8a	1.1406e-10	15	Unknown	50	5.36316	7.40096	3.32367
nTEC	ENSMUSG00000030691	Fchsd2	1.90677e-10	7	Unknown	63.3333	5.21774	18.1976	3.83348
nTEC	ENSMUSG00000032737	Inppl1	2.74433e-10	7	Unknown	60	4.97593	14.6713	2.68942
nTEC	ENSMUSG00000096215	Smim22	3.52201e-10	16	Unknown	93.3333	6.06043	36.4824	4.58586
nTEC	ENSMUSG00000068747	Sort1	4.15254e-10	3	Cell_Surface	60	6.0826	19.0248	4.22491
nTEC	ENSMUSG00000033792	Atp7a	4.91798e-10	X	Unknown	60	5.81754	19.6778	4.18467
nTEC	ENSMUSG00000020917	Acly	5.07074e-10	11	Unknown	90	7.47144	40.0958	5.77475
nTEC	ENSMUSG00000018143	Mafk	5.42253e-10	5	Transcription_Factor	70	6.42266	21.4192	4.54193
nTEC	ENSMUSG00000025757	Hspa4l	6.00869e-10	3	Unknown	83.3333	7.39771	31.5629	5.70213
nTEC	ENSMUSG00000023169	Slc38a1	6.02629e-10	15	Unknown	83.3333	6.74274	27.6883	5.41615
nTEC	ENSMUSG00000050148	Ubqln2	7.19766e-10	X	Unknown	76.6667	5.51979	31.6064	3.8717
nTEC	ENSMUSG00000018169	Mfng	8.59957e-10	15	Unknown	56.6667	6.45209	12.364	4.5147
nTEC	ENSMUSG00000048706	Lurap1l	8.81915e-10	4	Unknown	83.3333	7.37983	31.8241	6.03944
nTEC	ENSMUSG00000026090	2010300C02Rik	8.86668e-10	1	Unknown	63.3333	5.29043	14.9325	3.77151
nTEC	ENSMUSG00000055692	Tmem191c	9.40409e-10	16	Unknown	56.6667	6.51975	11.2756	4.21172
nTEC	ENSMUSG00000106375	NA	1.07667e-09	NA	Unknown	53.3333	6.85723	16.3692	4.66464
nTEC	ENSMUSG00000026956	Uap1l1	1.21113e-09	2	Unknown	43.3333	6.52339	11.1885	4.37233
nTEC	ENSMUSG00000049892	Rasd1	1.70195e-09	11	Unknown	66.6667	8.2551	20.5921	6.4577
nTEC	ENSMUSG00000031428	Zcchc18	1.71974e-09	X	Unknown	46.6667	6.70863	8.35873	4.51069
nTEC	ENSMUSG00000023122	Sult1c2	1.9262e-09	17	Unknown	50	7.16401	11.9286	4.94639
nTEC	ENSMUSG00000038859	Baiap2l1	2.4649e-09	5	Unknown	70	5.8658	20.505	4.31835
nTEC	ENSMUSG00000023915	Tnfrsf21	2.4649e-09	17	Unknown	50	6.27724	13.7571	4.09429
nTEC	ENSMUSG00000055866	Per2	2.6282e-09	1	Unknown	50	5.28285	10.6226	3.81064
nTEC	ENSMUSG00000082286	Pisd-ps1	2.72421e-09	11	Unknown	90	5.7596	43.0562	3.64753
nTEC	ENSMUSG00000053580	Tanc2	3.97502e-09	11	Unknown	66.6667	6.00432	21.5934	4.70241
nTEC	ENSMUSG00000079144	A130010J15Rik	5.0749e-09	1	Unknown	63.3333	6.23514	23.5525	4.58759
nTEC	ENSMUSG00000048489	8430408G22Rik	7.01322e-09	6	Unknown	36.6667	9.25203	9.22943	6.90409
nTEC	ENSMUSG00000042532	Golga7b	7.38428e-09	19	Unknown	76.6667	6.88433	20.0697	5.96667
nTEC	ENSMUSG00000015944	Gatsl2	7.66641e-09	5	Unknown	53.3333	5.52818	12.7993	3.76734
nTEC	ENSMUSG00000034427	Myo15b	8.21176e-09	11	Unknown	50	5.812	10.2743	4.63944
nTEC	ENSMUSG00000018659	Pnpo	8.34135e-09	11	Unknown	50	6.52932	13.5394	4.29028
nTEC	ENSMUSG00000024190	Dusp1	9.67683e-09	17	Unknown	90	10.7858	40.5747	8.74101
nTEC	ENSMUSG00000036641	Ccdc148	1.16028e-08	2	Unknown	53.3333	5.67714	14.0618	3.97984
nTEC	ENSMUSG00000038893	Fam117a	1.24372e-08	11	Unknown	56.6667	5.30715	16.0644	3.30803
nTEC	ENSMUSG00000075225	Ccdc162	1.31288e-08	10	Unknown	53.3333	5.48176	11.5803	3.63918
nTEC	ENSMUSG00000026123	Plekhb2	1.56141e-08	1	Unknown	76.6667	7.63044	32.869	5.85062
nTEC	ENSMUSG00000042298	Ttc19	1.56799e-08	11	Unknown	73.3333	5.62889	22.2899	4.36552
nTEC	ENSMUSG00000032091	Tmprss4	1.99073e-08	9	Unknown	93.3333	8.0742	31.6064	6.71745
nTEC	ENSMUSG00000085133	B930095G15Rik	1.99938e-08	14	Unknown	60	6.44133	15.8468	4.89151
nTEC	ENSMUSG00000095677	Dynlt1f	1.99938e-08	17	Unknown	96.6667	6.34746	47.6709	5.12895
nTEC	ENSMUSG00000052727	Map1b	2.05116e-08	13	Unknown	96.6667	8.92452	46.4519	6.97194
nTEC	ENSMUSG00000000579	Dynlt1c	2.38341e-08	17	Unknown	96.6667	5.03084	46.0601	3.88942
nTEC	ENSMUSG00000055415	Atp10b	2.389e-08	11	Unknown	60	5.67445	17.5446	4.47744
nTEC	ENSMUSG00000034171	Faah	2.97399e-08	4	Unknown	66.6667	5.83068	13.7571	5.15893
nTEC	ENSMUSG00000019066	Rab3d	3.25728e-08	9	Unknown	66.6667	7.08766	27.6012	5.22107
nTEC	ENSMUSG00000048138	Dmrt2	3.53722e-08	19	Transcription_Factor	90	8.94913	51.5455	6.78794
nTEC	ENSMUSG00000030688	Stard10	3.62149e-08	7	Unknown	90	8.20512	42.7079	6.11537
nTEC	ENSMUSG00000038145	Snrk	3.81688e-08	9	Unknown	90	7.0172	28.1236	5.09028
nTEC	ENSMUSG00000025795	Rassf3	4.06192e-08	10	Unknown	76.6667	5.75334	29.1685	4.0483
nTEC	ENSMUSG00000034640	Tiparp	4.15964e-08	3	Unknown	73.3333	6.82785	26.5128	5.22536
nTEC	ENSMUSG00000019312	Grb7	4.99394e-08	11	Unknown	83.3333	7.50157	31.9983	5.78713
nTEC	ENSMUSG00000031438	Rnf128	5.80034e-08	X	Unknown	93.3333	8.04141	49.717	6.8528
nTEC	ENSMUSG00000031785	Gpr56	6.1268e-08	8	Unknown	73.3333	6.59089	26.034	5.44401
nTEC	ENSMUSG00000037579	Kcnh3	7.78741e-08	15	Unknown	46.6667	5.69158	9.96953	4.10407
nTEC	ENSMUSG00000031442	Mcf2l	7.96215e-08	8	Unknown	66.6667	5.95356	24.7279	4.40162
nTEC	ENSMUSG00000096255	Dynlt1b	8.31159e-08	17	Unknown	86.6667	4.36272	30.5616	3.32751
nTEC	ENSMUSG00000024521	Pmaip1	9.34305e-08	18	Unknown	56.6667	7.34639	20.2438	5.4663
nTEC	ENSMUSG00000057069	Ero1lb	1.0942e-07	13	Unknown	90	8.50032	44.3187	6.69617
nTEC	ENSMUSG00000105547	NA	1.38284e-07	NA	Unknown	46.6667	7.80302	14.1924	5.36538
nTEC	ENSMUSG00000025217	Btrc	1.41416e-07	19	Unknown	76.6667	6.98646	32.303	5.58807
nTEC	ENSMUSG00000041757	Plekha6	1.53e-07	1	Unknown	60	5.57244	16.5869	4.80625
nTEC	ENSMUSG00000029053	Prkcz	1.67731e-07	4	Unknown	53.3333	5.42849	13.4523	3.82183
nTEC	ENSMUSG00000032246	Calml4	1.73652e-07	9	Unknown	70	7.83586	28.7767	5.92634
nTEC	ENSMUSG00000075702	Selm	2.02588e-07	11	Unknown	73.3333	7.03216	29.0814	6.25619
nTEC	ENSMUSG00000033502	Cdc14a	2.05242e-07	3	Unknown	53.3333	5.27401	15.1937	3.63882
nTEC	ENSMUSG00000017978	Cadps2	2.1338e-07	6	Unknown	60	6.14806	21.0274	4.73102
nTEC	ENSMUSG00000035007	Rundc1	2.22366e-07	11	Unknown	56.6667	5.49536	16.8481	4.3037
nTEC	ENSMUSG00000052026	Slc6a7	2.41319e-07	18	Unknown	63.3333	5.34825	16.5433	3.99409
nTEC	ENSMUSG00000047446	Arl4a	3.14273e-07	12	Unknown	83.3333	8.81991	44.667	6.91402
nTEC	ENSMUSG00000020782	Llgl2	3.3539e-07	11	Unknown	70	6.40582	26.3822	5.15841
nTEC	ENSMUSG00000051483	Cbr1	3.95137e-07	16	Unknown	96.6667	8.76631	51.2407	7.22283
nTEC	ENSMUSG00000021638	Ocln	4.56273e-07	13	Cell_Surface	53.3333	6.08204	18.1541	4.25525
nTEC	ENSMUSG00000089706	B230216N24Rik	4.56273e-07	1	Unknown	56.6667	7.0477	20.7662	4.3614
nTEC	ENSMUSG00000068735	Trp53i11	5.17951e-07	2	Unknown	70	6.43568	27.6012	5.09348
nTEC	ENSMUSG00000042249	Adrbk2	5.41287e-07	5	Unknown	66.6667	6.74778	22.943	4.64813
nTEC	ENSMUSG00000017723	Wfdc2	5.92293e-07	2	Unknown	96.6667	8.70193	47.1049	7.90404
nTEC	ENSMUSG00000032265	Fam46a	6.01621e-07	9	Unknown	63.3333	7.33687	25.0327	5.53713
nTEC	ENSMUSG00000032245	Cln6	6.50058e-07	9	Unknown	56.6667	5.35635	15.5855	3.8624
nTEC	ENSMUSG00000020052	Ascl1	6.70608e-07	10	Transcription_Factor	90	9.50154	47.0614	7.64252
nTEC	ENSMUSG00000028080	Lrba	6.99265e-07	3	Unknown	80	6.26859	27.8189	4.70796
nTEC	ENSMUSG00000041879	Ipo9	7.10268e-07	1	Unknown	70	5.87412	24.9891	4.69076
nTEC	ENSMUSG00000030739	Myh14	9.41191e-07	7	Unknown	50	5.92108	15.2373	4.62739
nTEC	ENSMUSG00000024064	Galnt14	1.02434e-06	17	Unknown	53.3333	6.37416	15.4114	4.93204
nTEC	ENSMUSG00000040938	Slc16a11	1.13687e-06	11	Unknown	60	6.37994	18.5024	5.78307
nTEC	ENSMUSG00000003352	Cacnb3	1.23272e-06	15	Unknown	76.6667	6.75887	30.5616	5.47518
nTEC	ENSMUSG00000021094	Dhrs7	1.2712e-06	12	Unknown	86.6667	8.54927	47.845	6.93513
nTEC	ENSMUSG00000021728	Emb	1.42905e-06	13	Unknown	86.6667	8.47937	45.8859	7.21156
nTEC	ENSMUSG00000027792	Bche	1.48331e-06	3	Unknown	60	6.05609	20.5485	4.47539
nTEC	ENSMUSG00000036330	Slc18a1	1.63136e-06	8	Unknown	53.3333	5.68755	16.6304	4.68753
nTEC	ENSMUSG00000054598	9130230L23Rik	1.64404e-06	5	Unknown	50	6.89365	15.1067	4.37894
nTEC	ENSMUSG00000024180	Tmem8	1.86371e-06	17	Unknown	56.6667	5.21301	16.4127	4.31025
nTEC	ENSMUSG00000037664	Cdkn1c	1.91912e-06	7	Unknown	56.6667	8.01459	17.1093	6.50274
nTEC	ENSMUSG00000024843	Chka	2.02788e-06	19	Unknown	93.3333	8.18851	53.1563	6.59129
nTEC	ENSMUSG00000031530	Dusp4	2.43959e-06	8	Unknown	73.3333	6.67471	28.5155	5.47199
nTEC	ENSMUSG00000041235	Chd7	2.5274e-06	4	Unknown	83.3333	5.92219	33.3043	5.19052
nTEC	ENSMUSG00000017386	Traf4	2.70021e-06	11	Unknown	66.6667	6.47411	26.2081	5.08511
nTEC	ENSMUSG00000022756	Slc7a4	2.70264e-06	16	Unknown	50	5.79447	13.9312	4.84212
nTEC	ENSMUSG00000020444	Guk1	2.96411e-06	11	Unknown	100	9.17997	59.6865	7.91407
nTEC	ENSMUSG00000003099	Ppp5c	3.15977e-06	7	Unknown	83.3333	7.0582	42.0113	5.69801
nTEC	ENSMUSG00000001700	Gramd3	3.17472e-06	18	Unknown	66.6667	6.87504	29.4297	5.27819
nTEC	ENSMUSG00000031906	Smpd3	3.22346e-06	8	Unknown	96.6667	6.2079	56.2037	5.35183
nTEC	ENSMUSG00000029135	Fosl2	3.49321e-06	5	Transcription_Factor	80	7.36485	34.0879	5.33654
nTEC	ENSMUSG00000020817	Rabep1	3.70247e-06	11	Unknown	76.6667	5.83313	31.8241	4.8931
nTEC	ENSMUSG00000022602	Arc	3.70247e-06	15	Unknown	40	7.46324	10.4049	5.54842
nTEC	ENSMUSG00000030413	Pglyrp1	4.21784e-06	7	Unknown	76.6667	7.57926	27.2965	7.36742
nTEC	ENSMUSG00000020423	Btg2	4.22681e-06	1	Unknown	96.6667	10.541	62.0374	9.34596
nTEC	ENSMUSG00000033577	Myo6	4.72741e-06	9	Unknown	83.3333	7.3926	42.4902	6.09075
nTEC	ENSMUSG00000026566	Mpzl1	4.88584e-06	1	Cell_Surface	73.3333	6.94029	29.778	5.73175
nTEC	ENSMUSG00000013643	Lypd8	5.05113e-06	11	Unknown	46.6667	7.35245	8.53287	7.52419
nTEC	ENSMUSG00000035864	Syt1	5.24614e-06	10	Unknown	93.3333	8.40246	44.6234	7.33666
nTEC	ENSMUSG00000024085	Man2a1	5.44623e-06	17	Unknown	66.6667	6.05109	29.9956	4.99995
nTEC	ENSMUSG00000040618	Pck2	5.7567e-06	14	Unknown	53.3333	6.07099	16.108	4.58623
nTEC	ENSMUSG00000008822	Acyp1	6.02032e-06	12	Unknown	70	5.64541	28.2978	4.49615
nTEC	ENSMUSG00000020777	Acox1	6.25427e-06	11	Unknown	86.6667	7.0148	41.4889	6.01398
nTEC	ENSMUSG00000040105	Ppapdc2	6.48611e-06	19	Unknown	53.3333	6.02317	19.8955	4.50922
nTEC	ENSMUSG00000026663	Atf6	7.24856e-06	1	Transcription_Factor	63.3333	6.69966	26.3822	5.00334
nTEC	ENSMUSG00000024063	Lbh	7.46753e-06	17	Unknown	83.3333	6.33188	35.6552	4.9366
nTEC	ENSMUSG00000027875	Hmgcs2	7.81007e-06	3	Unknown	43.3333	7.27291	8.88115	6.06635
nTEC	ENSMUSG00000000308	Ckmt1	8.87756e-06	2	Unknown	90	8.15947	37.3966	7.69742
nTEC	ENSMUSG00000057315	Arhgap24	9.17108e-06	5	Unknown	50	6.11655	16.108	4.75068
nTEC	ENSMUSG00000021250	Fos	9.84842e-06	12	Transcription_Factor	93.3333	11.8661	56.2908	10.6536
nTEC	ENSMUSG00000025854	Fam20c	1.00989e-05	5	Unknown	83.3333	7.91845	39.1815	6.12337
nTEC	ENSMUSG00000040525	Cblc	1.06039e-05	7	Unknown	53.3333	6.65948	18.7201	5.05943
nTEC	ENSMUSG00000044328	Trp53i13	1.17935e-05	11	Unknown	60	6.54223	22.1158	5.5141
nTEC	ENSMUSG00000026185	Igfbp5	1.81443e-05	1	Unknown	90	9.40528	42.1855	8.20585
nTEC	ENSMUSG00000022636	Alcam	1.91904e-05	16	Unknown	96.6667	8.6145	64.1271	7.16017
nTEC	ENSMUSG00000041220	Elovl6	1.98403e-05	3	Unknown	66.6667	6.37809	23.5525	5.178
nTEC	ENSMUSG00000024885	Aldh3b1	2.07076e-05	19	Unknown	50	6.35304	15.2808	5.39962
nTEC	ENSMUSG00000002546	Golga2	2.12657e-05	2	Unknown	66.6667	5.63411	25.8163	4.36529
nTEC	ENSMUSG00000025981	Coq10b	2.21542e-05	1	Unknown	70	6.8739	32.7384	5.57947
nTEC	ENSMUSG00000102252	NA	2.42672e-05	NA	Unknown	76.6667	6.55499	29.4732	5.34129
nTEC	ENSMUSG00000039519	Cyp7b1	2.45394e-05	3	Unknown	53.3333	6.14157	20.5921	4.39558
nTEC	ENSMUSG00000026456	Cyb5r1	2.45394e-05	1	Unknown	50	6.42922	18.633	4.81635
nTEC	ENSMUSG00000026202	Tuba4a	2.47748e-05	1	Unknown	63.3333	7.6582	26.9917	6.42549
nTEC	ENSMUSG00000030590	Fam98c	2.53133e-05	7	Unknown	56.6667	5.8131	22.0287	4.68677
nTEC	ENSMUSG00000030788	Rnf141	2.60623e-05	7	Unknown	66.6667	5.82022	30.8663	4.71306
nTEC	ENSMUSG00000057530	Ece1	2.74256e-05	4	Cell_Surface	80	7.34566	35.0892	7.47512
nTEC	ENSMUSG00000034940	Synrg	2.80479e-05	11	Unknown	63.3333	5.67339	31.8241	4.37575
nTEC	ENSMUSG00000004319	Clcn3	2.87459e-05	8	Unknown	90	7.57124	49.8912	6.35358
nTEC	ENSMUSG00000025731	0610011F06Rik	3.06227e-05	17	Unknown	93.3333	7.54826	46.1036	6.68668
nTEC	ENSMUSG00000039648	Ccbl1	3.53176e-05	2	Unknown	50	6.30186	19.3731	4.6535
nTEC	ENSMUSG00000063011	Msln	3.56937e-05	17	Cell_Surface	63.3333	9.91553	24.7714	7.86527
nTEC	ENSMUSG00000003051	Elf3	3.90342e-05	1	Transcription_Factor	66.6667	8.0793	31.9983	7.27388
nTEC	ENSMUSG00000011306	Sugp1	4.10491e-05	8	Unknown	76.6667	6.64925	35.2199	5.65568
nTEC	ENSMUSG00000031027	Stk33	4.64324e-05	7	Unknown	56.6667	5.82856	18.9377	4.69237
nTEC	ENSMUSG00000031703	Itfg1	4.79838e-05	8	Unknown	93.3333	7.49411	57.7275	6.3591
nTEC	ENSMUSG00000049422	Chchd10	4.84219e-05	10	Unknown	86.6667	7.61091	44.0575	6.56181
nTEC	ENSMUSG00000019818	Cd164	4.92829e-05	10	Unknown	100	8.89035	78.6243	7.65382
nTEC	ENSMUSG00000029772	Ahcyl2	6.01864e-05	6	Unknown	83.3333	9.22848	43.7092	7.27111
nTEC	ENSMUSG00000028937	Acot7	6.388e-05	4	Unknown	63.3333	8.03451	29.1249	6.2872
nTEC	ENSMUSG00000047045	Tmem164	6.3905e-05	X	Unknown	56.6667	5.77627	22.4205	4.77207
nTEC	ENSMUSG00000027316	Gfra4	6.39805e-05	2	Unknown	60	7.35827	24.0313	6.27713
nTEC	ENSMUSG00000025226	Fbxl15	6.91648e-05	19	Unknown	50	6.28452	19.1554	4.90048
nTEC	ENSMUSG00000028470	Hint2	7.05203e-05	4	Unknown	93.3333	7.13481	53.0257	6.44824
nTEC	ENSMUSG00000020462	Ccdc104	7.33914e-05	11	Unknown	83.3333	6.55575	43.0997	5.79063
nTEC	ENSMUSG00000026860	Sh3glb2	7.37561e-05	2	Unknown	80	7.04578	44.667	5.98926
nTEC	ENSMUSG00000039199	Zdhhc1	7.54136e-05	8	Unknown	50	6.42043	20.1567	4.84047
nTEC	ENSMUSG00000026797	Stxbp1	7.94418e-05	2	Unknown	56.6667	6.21674	23.5525	4.67377
nTEC	ENSMUSG00000020577	Tspan13	8.22926e-05	12	Unknown	70	6.54729	26.5999	6.18362
nTEC	ENSMUSG00000026628	Atf3	8.25813e-05	1	Transcription_Factor	73.3333	9.9266	36.5694	8.7099
nTEC	ENSMUSG00000040605	Bace2	8.44475e-05	16	Unknown	56.6667	7.07178	19.852	6.08126
nTEC	ENSMUSG00000018427	Ypel2	8.75906e-05	11	Unknown	70	5.73705	25.6421	4.75476
nTEC	ENSMUSG00000029833	Trim24	8.77594e-05	6	Unknown	73.3333	6.2422	32.2159	3.98964
nTEC	ENSMUSG00000079470	Utp14b	8.90095e-05	1	Unknown	53.3333	6.39894	19.6343	4.65975
nTEC	ENSMUSG00000022199	Slc22a17	8.93283e-05	14	Unknown	60	5.74629	21.3757	4.75544
nTEC	ENSMUSG00000031393	Mecp2	9.48445e-05	X	Transcription_Factor	90	5.88011	43.2738	4.98657
nTEC	ENSMUSG00000066357	Wdr6	9.54743e-05	9	Unknown	63.3333	6.81939	28.9508	5.62257
nTEC	ENSMUSG00000004070	Hmox2	0.000122463	16	Unknown	83.3333	7.35631	40.7053	6.3327
nTEC	ENSMUSG00000083282	Ctsf	0.000126436	19	Unknown	66.6667	7.13262	33.6526	6.31399
nTEC	ENSMUSG00000061666	Gdpd1	0.000128599	11	Unknown	63.3333	7.1187	25.5986	5.87775
nTEC	ENSMUSG00000026664	Phyh	0.000152106	2	Unknown	93.3333	7.67025	51.4149	7.02876
nTEC	ENSMUSG00000039801	2410089E03Rik	0.000156494	15	Unknown	70	5.83483	33.6526	5.15595
nTEC	ENSMUSG00000035356	Nfkbiz	0.000172311	16	Unknown	83.3333	7.21505	40.4876	6.43442
nTEC	ENSMUSG00000020864	Ankrd40	0.000180578	11	Unknown	66.6667	5.88503	31.6935	4.73429
nTEC	ENSMUSG00000026617	Bpnt1	0.000197994	1	Unknown	66.6667	6.17738	34.3492	5.11069
nTEC	ENSMUSG00000062300	Pvrl2	0.000200237	7	Cell_Surface	63.3333	6.54264	30.2133	5.50055
nTEC	ENSMUSG00000026113	Inpp4a	0.000218354	1	Unknown	86.6667	6.9343	44.8846	6.23859
nTEC	ENSMUSG00000022353	Mtss1	0.000220305	15	Unknown	73.3333	5.78587	35.7423	5.27193
nTEC	ENSMUSG00000035521	Gnptg	0.000221959	17	Unknown	96.6667	8.15152	53.6352	7.24304
nTEC	ENSMUSG00000035828	Pim3	0.000225838	15	Unknown	70	6.64558	32.4336	5.94078
nTEC	ENSMUSG00000030774	Pak1	0.00023854	7	Unknown	53.3333	6.03917	22.4641	4.79515
nTEC	ENSMUSG00000028988	Ctnnbip1	0.000248445	4	Unknown	73.3333	6.57569	39.1815	5.19136
nTEC	ENSMUSG00000036752	Tubb4b	0.000255613	2	Unknown	96.6667	9.00774	55.5072	8.29661
nTEC	ENSMUSG00000036955	2510003E04Rik	0.000260973	10	Unknown	70	6.10497	34.175	5.23185
nTEC	ENSMUSG00000039740	Alg2	0.000263298	4	Unknown	56.6667	6.80738	28.6461	5.18399
nTEC	ENSMUSG00000022973	Synj1	0.00026875	16	Unknown	63.3333	5.50297	27.3835	4.87549
nTEC	ENSMUSG00000022214	Dcaf11	0.00028267	14	Unknown	76.6667	7.58205	47.4097	6.4511
nTEC	ENSMUSG00000030850	Ate1	0.000294364	7	Unknown	80	5.61597	36.7436	5.03193
nTEC	ENSMUSG00000050957	Insl6	0.000345299	19	Unknown	70	7.24036	37.8755	6.01686
nTEC	ENSMUSG00000015094	Npdc1	0.000350145	2	Unknown	93.3333	7.80467	50.8054	7.10834
nTEC	ENSMUSG00000047139	Cd24a	0.000359069	10	Cell_Surface	76.6667	9.14115	51.6326	8.13973
nTEC	ENSMUSG00000039236	Isg20	0.000369026	7	Unknown	76.6667	7.97908	32.4771	8.25534
nTEC	ENSMUSG00000026520	Pycr2	0.000375301	1	Unknown	76.6667	7.21328	39.3121	6.46616
nTEC	ENSMUSG00000057738	Sptan1	0.000386956	2	Unknown	93.3333	7.56163	52.8951	6.53898
nTEC	ENSMUSG00000041958	Pigs	0.00039427	11	Unknown	76.6667	7.19398	40.5747	6.06523
nTEC	ENSMUSG00000036181	Hist1h1c	0.000402421	13	Unknown	66.6667	8.21512	38.2238	7.18871
nTEC	ENSMUSG00000038375	Trp53inp2	0.000415038	2	Unknown	83.3333	7.25248	47.0614	6.45514
nTEC	ENSMUSG00000064138	Fam172a	0.000468146	13	Unknown	70	6.00217	33.7832	5.18966
nTEC	ENSMUSG00000002968	Med25	0.000477627	7	Unknown	83.3333	6.39336	48.6286	5.63093
nTEC	ENSMUSG00000052298	Cdc42se2	0.00052718	11	Unknown	80	7.73338	52.4597	6.40476
nTEC	ENSMUSG00000018736	Ndel1	0.000546583	11	Unknown	80	6.826	43.6657	5.77818
nTEC	ENSMUSG00000030717	Nupr1	0.000551269	7	Unknown	66.6667	8.77407	32.5642	7.93021
nTEC	ENSMUSG00000031153	Gripap1	0.000576117	X	Unknown	63.3333	5.92939	30.0392	4.8807
nTEC	ENSMUSG00000025871	4833439L19Rik	0.000576257	13	Unknown	93.3333	7.67357	60.9055	6.67324
nTEC	ENSMUSG00000022043	Trim35	0.000588763	14	Unknown	83.3333	6.97316	46.1036	6.00765
nTEC	ENSMUSG00000056602	Fry	0.000595762	5	Unknown	83.3333	7.00301	43.3609	5.85335
nTEC	ENSMUSG00000054364	Rhob	0.000598281	12	Unknown	83.3333	6.71002	45.4941	5.68767
nTEC	ENSMUSG00000004394	Tmed4	0.000633029	11	Unknown	100	7.93069	60.6008	7.36355
nTEC	ENSMUSG00000001039	B9d1	0.000694432	11	Unknown	60	6.51805	25.5551	5.37192
nTEC	ENSMUSG00000018339	Gpx3	0.000738983	11	Unknown	90	10.5888	53.1998	11.063
nTEC	ENSMUSG00000028211	Trp53inp1	0.000754233	4	Unknown	83.3333	6.40351	40.357	5.82749
nTEC	ENSMUSG00000041012	Cmtm8	0.000786308	9	Unknown	70	6.33166	31.0405	5.66642
nTEC	ENSMUSG00000006273	Atp6v1b2	0.000818419	8	Unknown	90	7.71828	50.8925	6.65752
nTEC	ENSMUSG00000025504	Eps8l2	0.000819258	7	Unknown	86.6667	5.90612	38.9203	5.76778
nTEC	ENSMUSG00000030342	Cd9	0.000860323	6	Cell_Surface	100	11.9334	87.7667	9.96168
nTEC	ENSMUSG00000038533	Cbfa2t2	0.000884012	2	Transcription_Factor	63.3333	6.80855	31.6935	5.63879
nTEC	ENSMUSG00000003032	Klf4	0.000920489	4	Transcription_Factor	83.3333	8.21899	46.6696	7.38531
nTEC	ENSMUSG00000041771	Slc24a4	0.000952505	12	Unknown	73.3333	6.94775	28.7331	5.73141
nTEC	ENSMUSG00000024867	Pip5k1b	0.000961601	19	Unknown	80	6.09584	28.559	5.95937
nTEC	ENSMUSG00000033917	Gde1	0.000971065	7	Unknown	83.3333	8.42581	50.1524	7.34834
nTEC	ENSMUSG00000099881	NA	0.00101534	NA	Unknown	76.6667	6.18261	32.3901	5.69664
nTEC	ENSMUSG00000029787	Avl9	0.00104398	6	Unknown	66.6667	6.36214	32.3465	5.68902
nTEC	ENSMUSG00000021453	Gadd45g	0.00112289	13	Unknown	93.3333	10.5774	61.6021	8.88719
nTEC	ENSMUSG00000024240	Epc1	0.00116801	18	Unknown	80	5.98192	45.5812	5.04381
nTEC	ENSMUSG00000020284	1810043G02Rik	0.00124664	10	Unknown	56.6667	6.51673	25.3809	5.85531
nTEC	ENSMUSG00000029149	Krtcap3	0.00126259	5	Unknown	70	6.74072	33.0866	6.0225
nTEC	ENSMUSG00000028719	Cmpk1	0.00136183	4	Unknown	76.6667	6.53986	46.0601	5.4113
nTEC	ENSMUSG00000033444	Specc1l	0.00137475	10	Unknown	80	6.39987	36.3082	5.56518
nTEC	ENSMUSG00000036478	Btg1	0.00137978	10	Unknown	100	9.16484	87.2442	8.12875
nTEC	ENSMUSG00000042305	Tmem183a	0.00139611	1	Unknown	73.3333	6.47906	34.6974	5.21528
nTEC	ENSMUSG00000027775	Mfsd1	0.00143261	3	Unknown	83.3333	6.80155	38.6156	6.20327
nTEC	ENSMUSG00000026790	Odf2	0.00143261	2	Unknown	63.3333	6.11804	32.7384	5.2746
nTEC	ENSMUSG00000061132	Blnk	0.00151905	19	Unknown	90	7.27797	38.7027	7.49157
nTEC	ENSMUSG00000025220	Mgea5	0.00159321	19	Unknown	83.3333	6.20879	47.2355	5.44646
nTEC	ENSMUSG00000029470	P2rx4	0.0017406	5	Unknown	86.6667	7.25888	44.2751	7.01992
nTEC	ENSMUSG00000031751	Amfr	0.00181269	8	Unknown	73.3333	6.75581	40.6617	5.8322
nTEC	ENSMUSG00000026335	Pam	0.00181419	1	Cell_Surface	100	8.42265	89.3339	6.99538
nTEC	ENSMUSG00000020895	Tmem107	0.00186767	11	Unknown	73.3333	6.81979	35.7858	5.84999
nTEC	ENSMUSG00000029467	Atp2a2	0.00190803	5	Unknown	90	6.58591	50.8925	6.44076
nTEC	ENSMUSG00000023039	Krt7	0.00197375	15	Unknown	96.6667	11.0242	74.6626	9.89963
nTEC	ENSMUSG00000026576	Atp1b1	0.00200525	1	Unknown	90	8.64402	64.2577	8.43021
nTEC	ENSMUSG00000056050	Mia3	0.0020359	1	Unknown	90	7.35635	58.2064	6.2098
nTEC	ENSMUSG00000003545	Fosb	0.00203846	7	Transcription_Factor	70	7.6337	37.5272	7.09235
nTEC	ENSMUSG00000032624	Eml4	0.00205737	17	Unknown	80	6.66336	47.5403	5.7012
nTEC	ENSMUSG00000046070	Igfals	0.00219373	17	Unknown	66.6667	7.33326	29.4297	6.41551
nTEC	ENSMUSG00000101089	NA	0.00219526	NA	Unknown	73.3333	6.2894	40.0087	5.69952
nTEC	ENSMUSG00000051853	Arf3	0.00224029	15	Unknown	70	7.1255	41.576	6.13488
nTEC	ENSMUSG00000030615	Tmem126a	0.00224582	7	Unknown	93.3333	7.32137	60.2525	6.70507
nTEC	ENSMUSG00000031600	Vps37a	0.00225306	8	Unknown	73.3333	6.53863	43.1432	5.58782
nTEC	ENSMUSG00000063439	B9d2	0.00238759	7	Unknown	60	6.6874	27.0788	5.95049
nTEC	ENSMUSG00000022048	Dpysl2	0.00265481	14	Unknown	86.6667	7.69485	49.717	7.7175
nTEC	ENSMUSG00000024619	Cdx1	0.00285213	18	Transcription_Factor	90	7.27869	31.8677	7.6583
nTEC	ENSMUSG00000029811	Aoc1	0.00285213	6	Unknown	50	7.36964	20.5485	6.65817
nTEC	ENSMUSG00000021273	Fdft1	0.00319584	14	Unknown	66.6667	7.13742	33.7397	6.44329
nTEC	ENSMUSG00000056429	Tgoln1	0.00322049	6	Unknown	93.3333	7.89046	61.2973	6.93744
nTEC	ENSMUSG00000031683	Lsm6	0.00324031	8	Unknown	90	6.82207	54.0705	6.34519
nTEC	ENSMUSG00000037573	Tob1	0.00328867	11	Unknown	93.3333	6.81798	59.4253	5.87573
nTEC	ENSMUSG00000027531	Impa1	0.00337447	3	Unknown	80	6.83724	47.192	5.90505
nTEC	ENSMUSG00000075010	AW112010	0.00339596	19	Unknown	76.6667	9.88305	51.8502	8.51584
nTEC	ENSMUSG00000052040	Klf13	0.00343203	7	Unknown	93.3333	7.68728	52.8951	7.25043
nTEC	ENSMUSG00000070283	Ndufaf3	0.00356198	9	Unknown	80	7.63889	48.0192	6.7268
nTEC	ENSMUSG00000068267	Cenpb	0.00361558	2	Unknown	90	7.59963	60.0784	7.11687
nTEC	ENSMUSG00000044876	Zfp444	0.00382365	7	Transcription_Factor	70	6.38684	36.613	5.87883
nTEC	ENSMUSG00000068290	Ddrgk1	0.00388479	2	Unknown	86.6667	7.42482	57.5098	6.86642
nTEC	ENSMUSG00000015478	Rnf5	0.00400019	17	Unknown	80	7.2137	49.8912	6.39698
nTEC	ENSMUSG00000033335	Dnm2	0.00419405	9	Unknown	86.6667	7.55201	54.9848	6.59902
nTEC	ENSMUSG00000019302	Atp6v0a1	0.00420964	11	Unknown	90	6.18616	46.9308	5.69356
nTEC	ENSMUSG00000001666	Ddt	0.00438162	10	Unknown	93.3333	6.82614	56.0296	6.45491
nTEC	ENSMUSG00000038418	Egr1	0.00496147	18	Transcription_Factor	90	9.28449	57.7275	8.81214
nTEC	ENSMUSG00000026547	Tagln2	0.00518403	1	Unknown	96.6667	9.48038	65.9991	8.86554
nTEC	ENSMUSG00000001441	Npepps	0.00518955	11	Unknown	86.6667	6.57151	53.3304	5.78153
nTEC	ENSMUSG00000020308	Tpgs1	0.00550077	10	Unknown	90	7.37425	53.3304	7.04827
nTEC	ENSMUSG00000074922	Fam122a	0.00564465	19	Unknown	76.6667	6.94452	42.9691	6.3103
nTEC	ENSMUSG00000002580	Mien1	0.00573114	11	Unknown	96.6667	7.71122	70.7444	6.87746
nTEC	ENSMUSG00000022570	Tsta3	0.006294	15	Unknown	83.3333	6.9713	43.535	6.51996
nTEC	ENSMUSG00000049354	Dcaf7	0.00647744	11	Unknown	76.6667	6.90227	53.0692	6.27579
nTEC	ENSMUSG00000001687	Ubl3	0.00647812	5	Unknown	90	7.35187	63.0823	6.64561
nTEC	ENSMUSG00000033487	Fndc3a	0.00647848	14	Unknown	93.3333	6.40499	51.6326	6.21273
nTEC	ENSMUSG00000025283	Sat1	0.00738447	X	Unknown	93.3333	9.84875	65.8685	8.96265
nTEC	ENSMUSG00000038393	Txnip	0.00765973	3	Unknown	90	9.37712	60.6879	8.04269
nTEC	ENSMUSG00000028957	Per3	0.00804028	4	Unknown	73.3333	7.31291	43.5786	6.97116
nTEC	ENSMUSG00000024012	Mtch1	0.00828585	17	Unknown	100	7.99673	68.916	7.37828
nTEC	ENSMUSG00000032594	Ip6k1	0.00854709	9	Unknown	76.6667	6.94429	49.1075	6.38653
nTEC	ENSMUSG00000031246	Sh3bgrl	0.00891017	X	Unknown	83.3333	6.97891	57.4227	6.2363
nTEC	ENSMUSG00000035268	Pkig	0.00989393	2	Unknown	80	6.97641	51.0666	6.4411
nTEC	ENSMUSG00000053560	Ier2	0.0102909	8	Unknown	93.3333	10.0289	70.222	9.23645
nTEC	ENSMUSG00000019370	Calm3	0.0105276	7	Unknown	93.3333	7.48084	69.3949	6.724
nTEC	ENSMUSG00000045193	Cirbp	0.0106576	10	Unknown	86.6667	7.64971	68.7418	7.13889
nTEC	ENSMUSG00000033685	Ucp2	0.0107796	7	Unknown	93.3333	8.86929	67.044	8.60857
nTEC	ENSMUSG00000028669	Pithd1	0.0107839	4	Unknown	80	6.9043	40.5747	7.71712
nTEC	ENSMUSG00000066152	Slc31a2	0.0117865	4	Unknown	70	7.71335	40.1828	7.00763
nTEC	ENSMUSG00000024236	Svil	0.0118482	18	Unknown	86.6667	6.71228	58.424	6.29847
nTEC	ENSMUSG00000028447	Dctn3	0.0122272	4	Unknown	100	8.37967	72.9647	7.96394
nTEC	ENSMUSG00000064215	Ifi27	0.0127583	12	Unknown	100	8.97658	73.4436	8.92535
nTEC	ENSMUSG00000019210	Atp6v1e1	0.0132921	6	Unknown	100	8.72006	78.7984	8.11403
nTEC	ENSMUSG00000028581	Laptm5	0.0136759	4	Unknown	76.6667	9.06109	35.8293	8.31029
nTEC	ENSMUSG00000026473	Glul	0.0148358	1	Unknown	83.3333	8.1865	54.9848	7.87861
nTEC	ENSMUSG00000052712	BC004004	0.0168659	17	Unknown	86.6667	7.21018	59.1206	7.00077
nTEC	ENSMUSG00000026987	Baz2b	0.0169184	2	Unknown	83.3333	7.32309	63.4306	6.56634
nTEC	ENSMUSG00000012350	Ehf	0.0173995	2	Transcription_Factor	73.3333	7.24925	44.0139	7.07878
nTEC	ENSMUSG00000013822	Elof1	0.0177305	9	Unknown	86.6667	7.31549	58.8158	6.75588
nTEC	ENSMUSG00000000303	Cdh1	0.0178506	8	Unknown	100	8.20669	76.9264	7.99661
nTEC	ENSMUSG00000022295	Atp6v1c1	0.0180512	15	Unknown	86.6667	7.35421	53.5481	7.08093
nTEC	ENSMUSG00000027506	Tpd52	0.0185143	3	Unknown	96.6667	7.50392	72.094	7.18153
nTEC	ENSMUSG00000038530	Rgs4	0.0195242	1	Unknown	53.3333	8.73496	29.865	7.69209
nTEC	ENSMUSG00000018042	Cyb5r3	0.0216171	15	Unknown	96.6667	9.63473	80.1045	9.11473
nTEC	ENSMUSG00000066456	Hmgn3	0.0237705	9	Unknown	93.3333	7.89886	67.0875	7.17452
nTEC	ENSMUSG00000028410	Dnaja1	0.0247048	4	Unknown	100	9.79068	86.6783	8.92849
nTEC	ENSMUSG00000057411	Fam173a	0.024956	17	Unknown	90	7.47783	62.4293	7.18066
nTEC	ENSMUSG00000031516	Dctn6	0.0253409	8	Unknown	90	7.07386	55.6378	7.02347
nTEC	ENSMUSG00000020612	Prkar1a	0.0260188	11	Unknown	100	8.52589	78.276	8.14654
nTEC	ENSMUSG00000061111	Fam195b	0.0281941	11	Unknown	93.3333	7.8813	62.6469	7.64776
nTEC	ENSMUSG00000033161	Atp1a1	0.0284222	3	Unknown	100	8.53329	76.0557	8.46249
nTEC	ENSMUSG00000022708	Zbtb20	0.0289728	16	Unknown	93.3333	8.03973	71.3539	7.93833
nTEC	ENSMUSG00000028334	Nans	0.0354852	4	Unknown	86.6667	7.85888	59.2512	7.53919
nTEC	ENSMUSG00000020265	Sumo3	0.0355436	10	Unknown	90	8.28262	66.478	8.05333
nTEC	ENSMUSG00000033379	Atp6v0b	0.0390813	4	Unknown	100	8.41871	77.5359	8.43384
nTEC	ENSMUSG00000027315	Spint1	0.0457471	2	Unknown	96.6667	8.68294	72.3552	8.53222
nTEC	ENSMUSG00000040785	Ttc3	0.0499268	16	Unknown	96.6667	8.19785	74.532	7.82991
nTEC	ENSMUSG00000016256	Ctsz	0.0528507	2	Unknown	90	9.52687	58.5982	9.51389
nTEC	ENSMUSG00000040435	Ppp1r15a	0.0536895	7	Unknown	90	8.67007	53.6787	8.05402
nTEC	ENSMUSG00000052684	Jun	0.0576913	4	Transcription_Factor	96.6667	11.2511	84.5886	11.0768
nTEC	ENSMUSG00000004951	Hspb1	0.0926485	5	Unknown	90	10.0609	66.1297	9.4502
sTEC	ENSMUSG00000072941	Sod3	0	5	Unknown	100	11.2333	1.95397	3.50309
sTEC	ENSMUSG00000029309	Sparcl1	2.28013e-254	5	Unknown	95.8333	11.1685	3.51715	4.72826
sTEC	ENSMUSG00000016194	Hsd11b1	6.35374e-234	1	Unknown	100	11.3484	4.90664	4.46095
sTEC	ENSMUSG00000029096	Htra3	7.97054e-232	5	Unknown	83.3333	9.61909	1.95397	3.25188
sTEC	ENSMUSG00000026574	Dpt	1.07697e-227	1	Unknown	79.1667	9.58022	2.56188	2.87443
sTEC	ENSMUSG00000024678	Ms4a4d	4.11133e-204	19	Unknown	79.1667	8.7612	1.99739	2.30912
sTEC	ENSMUSG00000027750	Postn	1.10078e-192	3	Unknown	75	10.3901	2.86583	3.02378
sTEC	ENSMUSG00000040280	Ndufa4l2	2.1628e-182	10	Unknown	79.1667	6.79402	1.86713	1.45729
sTEC	ENSMUSG00000025780	Itih5	1.76594e-181	2	Unknown	87.5	8.06584	2.99609	1.9819
sTEC	ENSMUSG00000029070	Mxra8	1.36996e-178	4	Cell_Surface	95.8333	9.93746	5.21059	3.92278
sTEC	ENSMUSG00000009281	Rarres2	1.40569e-178	6	Unknown	100	9.84014	4.42901	4.83247
sTEC	ENSMUSG00000026656	Fcgr2b	1.27623e-153	1	Unknown	70.8333	8.67422	2.12766	3.35242
sTEC	ENSMUSG00000031825	Crispld2	1.58435e-147	8	Unknown	87.5	8.41578	3.2132	3.0843
sTEC	ENSMUSG00000025784	Clec3b	1.33333e-144	9	Unknown	79.1667	7.15662	3.38689	1.57677
sTEC	ENSMUSG00000036446	Lum	2.09439e-144	10	Unknown	95.8333	11.1472	7.0343	5.04552
sTEC	ENSMUSG00000029661	Col1a2	3.51071e-142	6	Unknown	75	8.21962	2.99609	1.90552
sTEC	ENSMUSG00000048126	Col6a3	1.2043e-137	1	Unknown	75	8.09185	2.34477	1.9826
sTEC	ENSMUSG00000019278	Dpep1	5.44847e-132	8	Unknown	58.3333	9.20034	2.04082	3.18104
sTEC	ENSMUSG00000016494	Cd34	1.02206e-130	1	Cell_Surface	91.6667	10.4482	7.12115	4.43612
sTEC	ENSMUSG00000022548	Apod	3.04943e-127	16	Unknown	100	12.1628	9.20538	6.08354
sTEC	ENSMUSG00000038156	Spon1	2.07823e-122	7	Unknown	79.1667	8.9904	3.86452	3.9638
sTEC	ENSMUSG00000048332	Lhfp	6.51759e-116	3	Unknown	100	9.53898	7.94616	4.10503
sTEC	ENSMUSG00000022425	Enpp2	5.7678e-115	15	Unknown	100	11.4428	10.8988	5.05323
sTEC	ENSMUSG00000001240	Ramp2	1.12641e-108	11	Cell_Surface	75	7.23006	2.2145	2.64107
sTEC	ENSMUSG00000029231	Pdgfra	3.33952e-106	5	Cell_Surface	75	7.35852	1.95397	2.02891
sTEC	ENSMUSG00000032377	Plscr4	4.68916e-104	9	Unknown	70.8333	7.63749	1.82371	1.6467
sTEC	ENSMUSG00000031375	Bgn	8.91566e-99	X	Cell_Surface	95.8333	10.3931	9.85671	4.76467
sTEC	ENSMUSG00000061080	Lsamp	8.85682e-97	16	Unknown	70.8333	8.07382	3.56057	2.1003
sTEC	ENSMUSG00000048120	Entpd1	4.22375e-93	19	Unknown	66.6667	6.31363	2.47503	1.63333
sTEC	ENSMUSG00000028111	Ctsk	7.9308e-88	3	Unknown	54.1667	7.41687	1.78029	3.509
sTEC	ENSMUSG00000001870	Ltbp1	6.47307e-84	17	Unknown	100	10.0731	14.3291	4.49713
sTEC	ENSMUSG00000026814	Eng	3.31066e-82	2	Cell_Surface	79.1667	6.94621	3.56057	2.56554
sTEC	ENSMUSG00000032766	Gng11	1.51287e-77	6	Unknown	79.1667	8.23234	6.90404	3.50338
sTEC	ENSMUSG00000001506	Col1a1	2.02285e-75	11	Unknown	79.1667	6.90731	4.64611	2.81633
sTEC	ENSMUSG00000026249	Serpine2	4.98024e-75	1	Unknown	100	12.744	22.4056	6.61271
sTEC	ENSMUSG00000036570	Fxyd1	7.00236e-74	7	Unknown	95.8333	7.25567	7.64221	3.52289
sTEC	ENSMUSG00000026674	Ddr2	5.38486e-71	1	Unknown	70.8333	6.79111	4.68954	2.34884
sTEC	ENSMUSG00000019899	Lama2	5.38501e-71	10	Unknown	70.8333	7.64536	4.51585	2.68343
sTEC	ENSMUSG00000036256	Igfbp7	2.53919e-68	5	Unknown	100	11.7632	16.066	6.58004
sTEC	ENSMUSG00000036103	Colec12	8.71068e-67	18	Unknown	91.6667	8.20335	9.33565	4.10535
sTEC	ENSMUSG00000010830	Kdelr3	9.81522e-67	15	Unknown	70.8333	8.1937	6.86062	3.82002
sTEC	ENSMUSG00000028339	Col15a1	2.3511e-66	4	Unknown	75	6.72644	4.2119	1.61389
sTEC	ENSMUSG00000032826	Ank2	2.55998e-63	3	Unknown	83.3333	6.91496	6.07903	2.81858
sTEC	ENSMUSG00000024379	Tslp	2.04799e-59	18	Unknown	75	6.06051	3.64742	3.46233
sTEC	ENSMUSG00000003617	Cp	6.04341e-59	3	Unknown	87.5	8.5703	8.77117	4.69585
sTEC	ENSMUSG00000037852	Cpe	1.78287e-58	8	Unknown	70.8333	8.73921	6.16587	4.10419
sTEC	ENSMUSG00000020814	Mxra7	1.16801e-57	11	Unknown	75	6.95118	6.64351	2.707
sTEC	ENSMUSG00000046768	Rhoj	2.94652e-56	12	Unknown	70.8333	7.60595	5.47112	3.6647
sTEC	ENSMUSG00000034845	Plvap	3.30088e-56	8	Cell_Surface	66.6667	7.0966	3.47373	3.5785
sTEC	ENSMUSG00000020467	Efemp1	1.57794e-53	11	Unknown	83.3333	8.77475	9.07512	4.94304
sTEC	ENSMUSG00000030208	Emp1	9.14922e-52	6	Unknown	91.6667	7.27602	9.24881	3.31372
sTEC	ENSMUSG00000021835	Bmp4	1.61989e-51	14	Unknown	62.5	7.15447	3.90795	3.4652
sTEC	ENSMUSG00000030551	Nr2f2	3.84672e-50	7	Transcription_Factor	91.6667	6.14094	9.37907	2.98627
sTEC	ENSMUSG00000029718	Pcolce	4.14315e-50	5	Unknown	87.5	9.31773	12.2015	4.98878
sTEC	ENSMUSG00000000753	Serpinf1	1.65335e-49	11	Unknown	95.8333	10.6554	16.6305	7.05998
sTEC	ENSMUSG00000024810	Il33	3.4056e-49	19	Unknown	79.1667	7.84727	7.20799	4.48938
sTEC	ENSMUSG00000031342	Gpm6b	4.20585e-47	X	Unknown	91.6667	9.25002	13.5041	5.64384
sTEC	ENSMUSG00000009687	Fxyd5	1.36072e-46	7	Unknown	75	8.47122	8.11984	3.99758
sTEC	ENSMUSG00000028031	Dkk2	2.93924e-46	3	Unknown	41.6667	7.21781	2.12766	2.63109
sTEC	ENSMUSG00000040212	Emp3	5.2466e-46	7	Unknown	87.5	8.50664	13.2002	4.64714
sTEC	ENSMUSG00000020486	Sept4	2.03321e-45	11	Unknown	70.8333	8.02872	7.0343	4.34138
sTEC	ENSMUSG00000031616	Ednra	8.3515e-45	8	Unknown	58.3333	6.47714	4.55927	2.23295
sTEC	ENSMUSG00000031538	Plat	7.22827e-44	8	Cell_Surface	75	8.06081	7.25141	4.91113
sTEC	ENSMUSG00000031750	Il34	3.52643e-43	8	Unknown	70.8333	8.54603	8.81459	3.87204
sTEC	ENSMUSG00000020377	Ltc4s	3.52643e-43	11	Unknown	91.6667	8.26837	13.1133	4.44927
sTEC	ENSMUSG00000022324	Matn2	4.64307e-43	15	Unknown	41.6667	6.89688	3.38689	2.39336
sTEC	ENSMUSG00000000359	Rem1	4.92378e-41	2	Unknown	66.6667	7.39487	7.20799	3.02047
sTEC	ENSMUSG00000031595	Pdgfrl	5.3993e-41	8	Unknown	50	7.5032	3.56057	3.16457
sTEC	ENSMUSG00000073490	AI607873	1.16683e-40	1	Unknown	54.1667	5.65292	2.2145	1.60087
sTEC	ENSMUSG00000031253	Srpx2	3.02892e-40	X	Cell_Surface	58.3333	6.38546	2.08424	3.26023
sTEC	ENSMUSG00000053475	Tnfaip6	6.98399e-40	2	Unknown	66.6667	7.49958	6.77377	4.37107
sTEC	ENSMUSG00000058571	Gpc6	1.89149e-39	14	Unknown	66.6667	5.83221	5.77508	2.52052
sTEC	ENSMUSG00000004151	Etv1	2.82627e-39	12	Transcription_Factor	79.1667	6.67594	10.5515	3.21765
sTEC	ENSMUSG00000030674	Qprt	3.45194e-39	7	Unknown	50	6.47954	3.38689	3.26809
sTEC	ENSMUSG00000015085	Entpd2	3.89076e-39	2	Unknown	87.5	8.89024	17.2818	4.79948
sTEC	ENSMUSG00000049521	Cdc42ep1	1.57383e-37	15	Unknown	58.3333	6.80035	4.2119	3.09763
sTEC	ENSMUSG00000046275	Tusc5	1.07355e-36	11	Unknown	58.3333	7.81808	5.8185	4.14533
sTEC	ENSMUSG00000050666	Vstm4	4.63633e-35	14	Unknown	54.1667	6.45454	5.16717	2.85447
sTEC	ENSMUSG00000027800	Tm4sf1	6.05252e-35	3	Unknown	66.6667	9.31706	7.20799	5.26923
sTEC	ENSMUSG00000026043	Col3a1	2.80546e-34	1	Unknown	70.8333	9.05672	8.59748	4.86814
sTEC	ENSMUSG00000037166	Ppp1r14a	1.11632e-33	7	Unknown	45.8333	4.40001	2.95267	1.54727
sTEC	ENSMUSG00000028108	Ecm1	1.80937e-33	3	Unknown	83.3333	8.69553	11.1594	5.91719
sTEC	ENSMUSG00000064080	Fbln2	5.6621e-32	6	Unknown	50	8.21893	5.73165	4.06991
sTEC	ENSMUSG00000001270	Ckb	8.93405e-32	12	Unknown	70.8333	7.45735	7.0343	5.21368
sTEC	ENSMUSG00000021091	Serpina3n	1.44025e-31	12	Unknown	58.3333	9.05947	8.033	4.95205
sTEC	ENSMUSG00000075254	Heg1	2.23677e-31	16	Cell_Surface	62.5	6.19376	5.51455	3.06028
sTEC	ENSMUSG00000026208	Des	4.27886e-31	1	Unknown	79.1667	8.12154	12.9396	4.94736
sTEC	ENSMUSG00000091345	Col6a5	4.44879e-31	9	Unknown	54.1667	7.28164	7.64221	3.63397
sTEC	ENSMUSG00000020473	Aebp1	1.58083e-30	11	Unknown	87.5	7.76911	17.2818	4.48419
sTEC	ENSMUSG00000029838	Ptn	2.19241e-30	6	Cell_Surface	100	10.6402	34.9978	6.53375
sTEC	ENSMUSG00000060703	Cd302	2.84703e-30	2	Unknown	91.6667	8.56534	21.4069	5.22005
sTEC	ENSMUSG00000026365	Cfh	6.49507e-30	1	Unknown	45.8333	7.66327	5.29744	3.27828
sTEC	ENSMUSG00000000093	Tbx2	8.94564e-30	11	Transcription_Factor	50	4.78023	2.77898	2.15922
sTEC	ENSMUSG00000027955	Fam198b	1.13816e-29	3	Unknown	41.6667	6.11583	3.95137	2.10853
sTEC	ENSMUSG00000049001	Ndnf	1.85335e-29	6	Unknown	45.8333	6.38919	4.03821	2.38458
sTEC	ENSMUSG00000047878	A4galt	2.41316e-29	15	Unknown	70.8333	7.07055	7.51194	3.28546
sTEC	ENSMUSG00000027074	Slc43a3	2.49931e-29	2	Unknown	91.6667	9.40744	20.7121	5.88448
sTEC	ENSMUSG00000069920	B3gnt9	3.39281e-29	8	Unknown	41.6667	6.00486	3.16978	2.23099
sTEC	ENSMUSG00000004631	Sgce	6.18469e-29	6	Unknown	66.6667	7.7987	9.59618	4.46323
sTEC	ENSMUSG00000023092	Fhl1	2.41001e-28	X	Unknown	66.6667	6.198	7.20799	3.24087
sTEC	ENSMUSG00000032011	Thy1	2.51644e-28	9	Cell_Surface	79.1667	5.63563	8.59748	2.75738
sTEC	ENSMUSG00000090523	Gypc	2.72003e-28	18	Unknown	54.1667	6.55527	6.4264	2.98922
sTEC	ENSMUSG00000026872	Zeb2	1.21623e-27	2	Unknown	54.1667	4.97164	3.34347	2.57932
sTEC	ENSMUSG00000027848	Olfml3	1.40495e-27	3	Unknown	50	7.46945	5.60139	4.54905
sTEC	ENSMUSG00000006369	Fbln1	4.11492e-27	15	Unknown	95.8333	9.55001	26.7477	6.12855
sTEC	ENSMUSG00000023224	Serping1	5.47486e-27	2	Unknown	100	10.8495	31.5675	7.21376
sTEC	ENSMUSG00000035258	Abi3bp	6.2095e-27	16	Unknown	75	7.76728	17.9766	4.5707
sTEC	ENSMUSG00000024620	Pdgfrb	1.07432e-25	18	Cell_Surface	62.5	6.43459	7.59878	3.45779
sTEC	ENSMUSG00000026389	Steap3	1.66301e-25	1	Unknown	54.1667	6.76866	5.4277	3.75937
sTEC	ENSMUSG00000015568	Lpl	1.88556e-25	8	Cell_Surface	66.6667	8.70182	11.2896	5.54286
sTEC	ENSMUSG00000020810	Cygb	2.38956e-25	11	Unknown	83.3333	7.63316	17.4989	4.52991
sTEC	ENSMUSG00000006586	Runx1t1	1.37992e-24	4	Transcription_Factor	54.1667	5.56104	5.99218	2.87289
sTEC	ENSMUSG00000019055	Plod1	2.2533e-24	4	Unknown	70.8333	6.54833	8.51064	3.76919
sTEC	ENSMUSG00000027875	Hmgcs2	2.87448e-24	3	Unknown	66.6667	8.56125	8.72775	6.02049
sTEC	ENSMUSG00000014329	Bicc1	1.4655e-23	10	Unknown	62.5	7.0464	10.2041	3.19086
sTEC	ENSMUSG00000025810	Nrp1	2.54064e-23	8	Cell_Surface	79.1667	8.3462	18.3673	4.54695
sTEC	ENSMUSG00000001493	Meox1	7.95334e-23	11	Transcription_Factor	62.5	7.83071	10.7686	4.51696
sTEC	ENSMUSG00000022836	Mylk	2.13119e-22	16	Unknown	87.5	7.59669	20.6253	4.7492
sTEC	ENSMUSG00000041577	Prelp	2.23702e-22	1	Unknown	91.6667	9.50346	21.32	6.49745
sTEC	ENSMUSG00000090231	Cfb	3.19826e-22	17	Unknown	66.6667	3.88005	8.90143	1.39732
sTEC	ENSMUSG00000016128	Stard13	3.23311e-22	5	Unknown	41.6667	4.71453	2.95267	2.13208
sTEC	ENSMUSG00000068220	Lgals1	8.85328e-21	15	Cell_Surface	100	9.88024	40.5124	7.01159
sTEC	ENSMUSG00000037031	Tspan15	1.75872e-20	10	Cell_Surface	54.1667	7.80511	8.72775	4.85712
sTEC	ENSMUSG00000024238	Zeb1	1.92051e-20	18	Transcription_Factor	79.1667	6.94333	12.0712	3.85159
sTEC	ENSMUSG00000027765	P2ry1	3.56733e-20	3	Cell_Surface	50	5.83431	5.77508	2.86392
sTEC	ENSMUSG00000014846	Tppp3	8.77178e-20	8	Unknown	66.6667	8.71306	15.6752	5.91001
sTEC	ENSMUSG00000003518	Dusp3	6.59487e-19	11	Unknown	62.5	7.19533	12.766	3.9895
sTEC	ENSMUSG00000020363	Gfpt2	7.17203e-19	11	Unknown	54.1667	6.74638	5.77508	3.25053
sTEC	ENSMUSG00000019929	Dcn	2.22286e-18	10	Unknown	100	13.9667	45.2453	10.3601
sTEC	ENSMUSG00000019539	Rcn3	2.42344e-18	7	Unknown	100	9.76951	34.9978	7.17896
sTEC	ENSMUSG00000037813	D630003M21Rik	4.45771e-18	2	Unknown	54.1667	5.94254	4.73296	2.39892
sTEC	ENSMUSG00000030737	Slco2b1	6.96802e-18	7	Unknown	54.1667	7.1549	9.0317	4.3578
sTEC	ENSMUSG00000041120	Nbl1	9.90921e-18	4	Unknown	87.5	9.02486	28.8754	6.11715
sTEC	ENSMUSG00000025511	Tspan4	2.91567e-17	7	Unknown	66.6667	8.15239	14.5028	5.26426
sTEC	ENSMUSG00000029674	Limk1	3.22767e-17	5	Unknown	45.8333	5.92695	7.90274	2.55159
sTEC	ENSMUSG00000029061	Mmp23	5.44471e-17	4	Unknown	58.3333	7.76828	10.3343	4.94831
sTEC	ENSMUSG00000026728	Vim	1.11229e-16	2	Unknown	95.8333	9.35413	34.3031	7.31146
sTEC	ENSMUSG00000025491	Ifitm1	1.62131e-16	7	Unknown	79.1667	8.43378	21.0161	6.57993
sTEC	ENSMUSG00000002732	Fkbp7	1.00063e-15	2	Unknown	66.6667	8.12755	18.5845	4.98948
sTEC	ENSMUSG00000030605	Mfge8	1.03421e-15	7	Unknown	100	11.1533	58.0547	8.31235
sTEC	ENSMUSG00000018217	Pmp22	1.20243e-15	11	Unknown	83.3333	8.33336	22.97	6.47351
sTEC	ENSMUSG00000029156	Sgcb	1.27742e-15	5	Unknown	54.1667	6.82713	10.9857	4.2251
sTEC	ENSMUSG00000032014	Oaf	1.45432e-15	9	Unknown	62.5	7.54975	17.8897	4.55206
sTEC	ENSMUSG00000075702	Selm	1.52314e-15	11	Unknown	95.8333	7.84263	28.9622	6.23937
sTEC	ENSMUSG00000030717	Nupr1	2.21711e-15	7	Unknown	100	9.89766	32.3057	7.90109
sTEC	ENSMUSG00000026586	Prrx1	7.49313e-15	1	Unknown	83.3333	7.03454	12.8528	4.74583
sTEC	ENSMUSG00000073599	Ecscr	3.18451e-14	18	Unknown	75	8.11984	21.5371	5.66252
sTEC	ENSMUSG00000022103	Gfra2	8.06633e-14	14	Unknown	66.6667	6.69696	16.3265	4.31713
sTEC	ENSMUSG00000031990	Jam3	8.49642e-14	9	Cell_Surface	37.5	5.75505	5.64481	3.10008
sTEC	ENSMUSG00000054203	Ifi205	2.06588e-13	1	Unknown	54.1667	6.60929	11.8975	3.59132
sTEC	ENSMUSG00000003420	Fcgrt	3.59314e-13	7	Unknown	91.6667	9.6909	36.2136	7.22257
sTEC	ENSMUSG00000026958	Dpp7	5.86985e-13	2	Unknown	41.6667	6.79983	7.25141	4.30708
sTEC	ENSMUSG00000079018	Ly6c1	8.49288e-13	15	Unknown	37.5	6.66102	5.90534	4.52225
sTEC	ENSMUSG00000022048	Dpysl2	8.83637e-13	14	Unknown	95.8333	9.47496	49.7178	7.68095
sTEC	ENSMUSG00000057098	Ebf1	1.19009e-12	11	Transcription_Factor	87.5	6.67926	20.4516	4.62013
sTEC	ENSMUSG00000055172	C1ra	1.96255e-12	6	Unknown	91.6667	8.34651	31.8715	5.96119
sTEC	ENSMUSG00000034118	Tpst1	3.17626e-12	5	Unknown	70.8333	7.59983	20.1911	5.14827
sTEC	ENSMUSG00000069763	Tmem100	3.82282e-12	11	Unknown	29.1667	7.09289	4.47243	3.40629
sTEC	ENSMUSG00000038521	C1s	5.40927e-12	6	Unknown	100	9.5771	32.7833	6.99957
sTEC	ENSMUSG00000002504	Slc9a3r2	5.9837e-12	17	Unknown	50	7.07344	8.77117	4.31046
sTEC	ENSMUSG00000064373	Sepp1	7.65119e-12	15	Unknown	95.8333	8.56169	33.0873	6.25213
sTEC	ENSMUSG00000037211	Spry1	1.25883e-11	3	Unknown	50	7.02544	12.7225	4.05946
sTEC	ENSMUSG00000047907	Tshz2	1.65566e-11	2	Unknown	79.1667	6.02626	16.5436	4.15411
sTEC	ENSMUSG00000022261	Sdc2	1.70764e-11	15	Unknown	83.3333	8.34645	34.6939	5.85206
sTEC	ENSMUSG00000029322	Plac8	1.90323e-11	5	Unknown	79.1667	8.85698	19.0187	6.874
sTEC	ENSMUSG00000028073	Pear1	2.49379e-11	3	Unknown	45.8333	5.67251	6.99088	3.09265
sTEC	ENSMUSG00000056515	Rab31	5.37748e-11	17	Unknown	50	7.49836	11.333	4.27213
sTEC	ENSMUSG00000026475	Rgs16	5.69151e-11	1	Unknown	41.6667	7.56802	7.94616	3.62359
sTEC	ENSMUSG00000096956	0610007N19Rik	1.14945e-10	15	Unknown	66.6667	5.4623	14.2423	3.98108
sTEC	ENSMUSG00000037820	Tgm2	1.4e-10	2	Unknown	70.8333	7.16954	18.4976	5.47359
sTEC	ENSMUSG00000006205	Htra1	1.49516e-10	7	Unknown	100	9.2833	41.3808	7.43947
sTEC	ENSMUSG00000050212	Eva1b	2.38494e-10	4	Unknown	54.1667	5.80327	10.812	3.89975
sTEC	ENSMUSG00000038587	Akap12	3.14265e-10	10	Unknown	75	7.6619	29.6135	5.99347
sTEC	ENSMUSG00000022893	Adamts1	3.92412e-10	16	Unknown	58.3333	6.91327	12.2449	5.05277
sTEC	ENSMUSG00000110206	NA	4.08529e-10	NA	Cell_Surface	66.6667	6.10937	23.6214	3.66807
sTEC	ENSMUSG00000018001	Cyth3	4.08529e-10	5	Unknown	70.8333	6.99376	25.1411	4.50774
sTEC	ENSMUSG00000000901	Mmp11	6.82008e-10	10	Unknown	45.8333	7.15241	7.55536	3.58355
sTEC	ENSMUSG00000031740	Mmp2	9.93998e-10	8	Unknown	75	8.57396	23.6214	6.61109
sTEC	ENSMUSG00000002847	Pla1a	1.4288e-09	16	Unknown	70.8333	8.29136	23.7516	6.46468
sTEC	ENSMUSG00000032265	Fam46a	1.55008e-09	9	Unknown	75	7.72465	25.0109	5.5303
sTEC	ENSMUSG00000026879	Gsn	1.72093e-09	2	Unknown	100	13.8753	66.1746	9.93936
sTEC	ENSMUSG00000021190	Lgmn	2.34228e-09	12	Unknown	79.1667	7.69639	36.6044	5.88157
sTEC	ENSMUSG00000039007	Cpq	2.60099e-09	15	Unknown	87.5	8.58182	37.9071	6.32558
sTEC	ENSMUSG00000026278	Bok	4.71435e-09	1	Unknown	83.3333	8.81281	39.2097	7.28729
sTEC	ENSMUSG00000042284	Itga1	4.91114e-09	13	Cell_Surface	58.3333	7.02924	16.6305	4.58913
sTEC	ENSMUSG00000020009	Ifngr1	5.80666e-09	10	Unknown	100	9.80671	59.9218	7.38126
sTEC	ENSMUSG00000032431	Crtap	6.93941e-09	9	Unknown	75	8.38722	33.8254	5.99478
sTEC	ENSMUSG00000068566	Myadm	7.54295e-09	7	Unknown	79.1667	6.40278	26.6609	4.6495
sTEC	ENSMUSG00000009418	Nav1	9.80373e-09	1	Unknown	62.5	7.09328	17.9766	4.57376
sTEC	ENSMUSG00000066705	Fxyd6	1.02871e-08	9	Unknown	50	8.0936	15.0673	5.44045
sTEC	ENSMUSG00000007476	Lrrc8a	1.42006e-08	2	Cell_Surface	87.5	7.17446	44.8111	5.58233
sTEC	ENSMUSG00000001918	Slc1a5	1.52019e-08	7	Unknown	50	6.00722	12.462	3.97721
sTEC	ENSMUSG00000038679	Trps1	2.10337e-08	15	Transcription_Factor	66.6667	6.10122	22.8832	4.25078
sTEC	ENSMUSG00000022620	Arsa	2.9601e-08	15	Unknown	62.5	6.74818	18.541	4.29208
sTEC	ENSMUSG00000021567	Nkd2	3.11936e-08	13	Unknown	54.1667	6.94967	13.1568	4.95707
sTEC	ENSMUSG00000000594	Gm2a	3.47873e-08	11	Unknown	83.3333	7.82101	32.1754	6.82048
sTEC	ENSMUSG00000051041	Olfml1	3.82205e-08	7	Unknown	62.5	7.84446	19.1055	5.80902
sTEC	ENSMUSG00000021822	Plau	8.52657e-08	14	Cell_Surface	50	6.25624	12.2449	4.01394
sTEC	ENSMUSG00000022330	Osr2	9.63474e-08	15	Unknown	41.6667	7.0463	9.24881	4.81849
sTEC	ENSMUSG00000027408	Cpxm1	1.32864e-07	2	Unknown	66.6667	8.66726	20.6687	6.16458
sTEC	ENSMUSG00000039239	Tgfb2	1.5071e-07	1	Unknown	70.8333	7.08731	22.7964	5.27633
sTEC	ENSMUSG00000023191	Leprel2	1.72875e-07	6	Unknown	54.1667	5.37284	11.2462	3.77379
sTEC	ENSMUSG00000074207	Adh1	1.82267e-07	3	Unknown	50	7.36175	11.333	6.08491
sTEC	ENSMUSG00000022231	Sema5a	1.97299e-07	15	Unknown	41.6667	5.4766	8.59748	3.80604
sTEC	ENSMUSG00000029380	Cxcl1	1.97299e-07	5	Unknown	45.8333	8.71024	13.6344	6.75258
sTEC	ENSMUSG00000055148	Klf2	3.09722e-07	8	Transcription_Factor	70.8333	8.15956	33.0439	6.09515
sTEC	ENSMUSG00000022665	Ccdc80	3.18994e-07	16	Unknown	87.5	9.35869	40.6861	7.73862
sTEC	ENSMUSG00000028494	Plin2	3.38654e-07	4	Unknown	66.6667	8.39114	26.4872	6.31044
sTEC	ENSMUSG00000031565	Fgfr1	4.44824e-07	8	Unknown	58.3333	5.91692	14.416	4.40672
sTEC	ENSMUSG00000037706	Cd81	4.55714e-07	7	Unknown	100	9.88066	59.9653	8.32591
sTEC	ENSMUSG00000031875	Cmtm3	5.12917e-07	8	Unknown	66.6667	7.8696	26.7477	5.82862
sTEC	ENSMUSG00000047446	Arl4a	5.88141e-07	12	Unknown	87.5	8.51817	44.7243	6.93483
sTEC	ENSMUSG00000020676	Ccl11	7.5115e-07	11	Unknown	87.5	10.5503	28.1806	10.1456
sTEC	ENSMUSG00000071637	Cebpd	7.90806e-07	16	Transcription_Factor	75	9.12122	38.0808	6.96936
sTEC	ENSMUSG00000035385	Ccl2	8.59596e-07	11	Unknown	29.1667	8.0136	6.73035	5.74835
sTEC	ENSMUSG00000040488	Ltbp4	1.16951e-06	7	Unknown	79.1667	6.83502	25.7924	5.62663
sTEC	ENSMUSG00000018398	Sept8	1.61292e-06	11	Unknown	58.3333	6.0885	23.274	4.48062
sTEC	ENSMUSG00000043885	Slc36a4	1.76511e-06	9	Unknown	41.6667	5.94056	12.5923	4.21039
sTEC	ENSMUSG00000019467	Arhgef25	1.84328e-06	10	Unknown	41.6667	6.64514	12.1146	4.35058
sTEC	ENSMUSG00000023034	Nr4a1	1.87862e-06	15	Transcription_Factor	41.6667	8.02255	12.3752	5.63493
sTEC	ENSMUSG00000020432	Tcn2	2.10888e-06	11	Unknown	79.1667	8.83956	46.4611	7.06997
sTEC	ENSMUSG00000036585	Fgf1	2.24864e-06	18	Unknown	54.1667	6.04577	15.1107	4.70878
sTEC	ENSMUSG00000072844	G530011O06Rik	2.38911e-06	X	Unknown	45.8333	6.38129	13.2002	3.80844
sTEC	ENSMUSG00000026956	Uap1l1	2.62278e-06	2	Unknown	37.5	7.15509	11.333	4.34839
sTEC	ENSMUSG00000024190	Dusp1	2.64798e-06	17	Unknown	87.5	10.4011	40.7295	8.76705
sTEC	ENSMUSG00000000278	Scpep1	2.69454e-06	11	Unknown	70.8333	8.31254	33.5649	5.87411
sTEC	ENSMUSG00000033585	Ndn	2.94871e-06	7	Unknown	33.3333	6.40254	9.29223	4.48615
sTEC	ENSMUSG00000058135	Gstm1	3.11788e-06	3	Unknown	91.6667	10.2024	42.0321	9.00547
sTEC	ENSMUSG00000024501	Dpysl3	3.29661e-06	18	Unknown	91.6667	8.78051	46.1572	7.53469
sTEC	ENSMUSG00000023913	Pla2g7	3.52256e-06	17	Unknown	50	8.91797	17.3686	6.48405
sTEC	ENSMUSG00000008540	Mgst1	3.55255e-06	6	Unknown	83.3333	9.02021	41.0334	7.39551
sTEC	ENSMUSG00000042116	Vwa1	4.4849e-06	4	Unknown	70.8333	8.63273	35.5623	6.99247
sTEC	ENSMUSG00000032184	Lysmd2	4.73268e-06	9	Unknown	62.5	7.17862	20.4082	4.76146
sTEC	ENSMUSG00000079593	Gm14597	5.03386e-06	X	Unknown	66.6667	4.61669	26.0964	3.31989
sTEC	ENSMUSG00000070436	Serpinh1	7.33036e-06	7	Unknown	95.8333	7.79096	56.6218	6.03431
sTEC	ENSMUSG00000044303	Cdkn2a	7.77229e-06	4	Transcription_Factor	62.5	6.36786	20.1476	5.12477
sTEC	ENSMUSG00000025921	Rdh10	8.39668e-06	1	Unknown	66.6667	7.02535	29.2662	5.89548
sTEC	ENSMUSG00000032440	Tgfbr2	8.86273e-06	9	Cell_Surface	70.8333	6.07354	23.5345	4.67471
sTEC	ENSMUSG00000001663	Gstt1	9.66235e-06	10	Unknown	70.8333	8.15195	27.399	6.69386
sTEC	ENSMUSG00000028763	Hspg2	9.68092e-06	4	Unknown	70.8333	5.21276	24.7503	3.9899
sTEC	ENSMUSG00000021760	Gpx8	9.90186e-06	13	Unknown	70.8333	8.08146	31.003	6.62392
sTEC	ENSMUSG00000030123	Plxnd1	1.06201e-05	6	Unknown	50	5.46076	15.5015	3.60508
sTEC	ENSMUSG00000025232	Hexa	1.11444e-05	9	Unknown	70.8333	8.82241	38.6887	6.59323
sTEC	ENSMUSG00000021876	Rnase4	1.21081e-05	14	Unknown	91.6667	9.45555	44.4203	8.43373
sTEC	ENSMUSG00000027204	Fbn1	1.23504e-05	2	Unknown	70.8333	7.68462	27.4859	5.81197
sTEC	ENSMUSG00000017466	Timp2	1.38653e-05	11	Cell_Surface	87.5	8.67003	44.6374	7.10205
sTEC	ENSMUSG00000030560	Ctsc	1.41344e-05	7	Unknown	87.5	7.93323	41.8584	7.27856
sTEC	ENSMUSG00000058013	Sept11	1.48076e-05	5	Unknown	83.3333	8.4084	55.7534	7.15767
sTEC	ENSMUSG00000019960	Dusp6	1.52878e-05	10	Unknown	62.5	6.1087	20.1911	5.22522
sTEC	ENSMUSG00000024164	C3	1.60013e-05	17	Unknown	100	11.4727	60.1389	9.36516
sTEC	ENSMUSG00000103220	NA	1.76445e-05	NA	Unknown	45.8333	6.01755	14.5462	4.23222
sTEC	ENSMUSG00000065954	Tacc1	1.79809e-05	8	Unknown	87.5	7.26337	55.4494	5.94333
sTEC	ENSMUSG00000035268	Pkig	2.04518e-05	2	Unknown	83.3333	7.5817	51.1073	6.4314
sTEC	ENSMUSG00000045817	Zfp36l2	2.08314e-05	17	Unknown	66.6667	5.5616	27.1819	3.72929
sTEC	ENSMUSG00000059588	Calcrl	2.12955e-05	2	Unknown	66.6667	6.23792	36.7781	4.59065
sTEC	ENSMUSG00000025969	Nrp2	2.36789e-05	1	Unknown	62.5	6.12407	14.0252	5.01898
sTEC	ENSMUSG00000030218	Mgp	2.38439e-05	6	Unknown	87.5	11.365	46.6782	9.41519
sTEC	ENSMUSG00000012017	Scarf2	2.62098e-05	16	Unknown	50	5.34812	15.1976	4.98878
sTEC	ENSMUSG00000076441	Ass1	2.97377e-05	2	Unknown	45.8333	6.90111	16.2831	5.15035
sTEC	ENSMUSG00000018593	Sparc	3.57406e-05	11	Cell_Surface	95.8333	11.4343	51.5849	9.50555
sTEC	ENSMUSG00000036599	Chst12	3.80827e-05	5	Unknown	50	6.21964	18.4108	4.75037
sTEC	ENSMUSG00000001119	Col6a1	3.99848e-05	10	Unknown	83.3333	9.68458	40.2084	7.77667
sTEC	ENSMUSG00000020241	Col6a2	4.8231e-05	10	Unknown	87.5	9.23005	33.9123	7.52307
sTEC	ENSMUSG00000022817	Itgb5	5.07146e-05	16	Cell_Surface	54.1667	6.5791	14.0686	4.93474
sTEC	ENSMUSG00000019975	Ikbip	5.83569e-05	10	Unknown	70.8333	6.68023	30.7859	5.4439
sTEC	ENSMUSG00000021281	Tnfaip2	5.92754e-05	12	Unknown	75	7.4508	38.1242	6.25228
sTEC	ENSMUSG00000017144	Rnd3	6.29486e-05	2	Unknown	75	6.50697	37.3426	5.72534
sTEC	ENSMUSG00000073802	Cdkn2b	7.0399e-05	4	Unknown	70.8333	6.98571	28.3109	6.56748
sTEC	ENSMUSG00000041779	Tram2	7.12984e-05	1	Unknown	45.8333	6.34617	17.0213	4.77113
sTEC	ENSMUSG00000019966	Kitl	7.86818e-05	10	Unknown	50	6.25138	19.0187	4.4053
sTEC	ENSMUSG00000024431	Nr3c1	8.72947e-05	18	Transcription_Factor	75	7.62884	45.4624	6.32695
sTEC	ENSMUSG00000015714	Cers2	9.27333e-05	3	Unknown	83.3333	7.69841	46.1138	6.70479
sTEC	ENSMUSG00000017760	Ctsa	9.69051e-05	2	Unknown	91.6667	9.05666	60.4863	7.79746
sTEC	ENSMUSG00000096145	Vkorc1	0.000103866	7	Unknown	87.5	7.52954	53.452	6.11136
sTEC	ENSMUSG00000019487	Trip10	0.000106851	17	Unknown	58.3333	6.42079	27.1819	5.21759
sTEC	ENSMUSG00000037206	Islr	0.000112558	9	Unknown	41.6667	6.92868	16.0226	5.16309
sTEC	ENSMUSG00000024480	Ap3s1	0.00011289	18	Unknown	70.8333	6.02407	37.0386	5.01156
sTEC	ENSMUSG00000021900	Btd	0.000113	14	Unknown	45.8333	7.42619	21.7977	5.18098
sTEC	ENSMUSG00000005125	Ndrg1	0.000114571	15	Unknown	54.1667	6.52377	15.8923	5.20156
sTEC	ENSMUSG00000040466	Blvrb	0.000117008	7	Unknown	54.1667	6.0116	20.1042	5.25104
sTEC	ENSMUSG00000027797	Dclk1	0.000117008	3	Unknown	75	6.98206	25.749	6.43115
sTEC	ENSMUSG00000024909	Efemp2	0.000140472	19	Unknown	54.1667	7.31245	22.4056	5.87069
sTEC	ENSMUSG00000038776	Ephx1	0.000145658	1	Unknown	91.6667	8.73986	46.3309	8.08289
sTEC	ENSMUSG00000032359	Ctsh	0.000153453	9	Unknown	83.3333	9.67807	44.0729	9.27672
sTEC	ENSMUSG00000030103	Bhlhe40	0.000220334	6	Unknown	58.3333	8.14544	30.6122	5.79555
sTEC	ENSMUSG00000026478	Lamc1	0.000226728	1	Unknown	45.8333	6.34456	19.5832	4.41909
sTEC	ENSMUSG00000035373	Ccl7	0.00023606	11	Unknown	33.3333	8.25378	8.16327	5.97221
sTEC	ENSMUSG00000067586	S1pr3	0.000243404	13	Unknown	66.6667	7.30292	31.6544	6.85777
sTEC	ENSMUSG00000031453	Rasa3	0.000245619	8	Unknown	62.5	7.25564	28.1806	5.07327
sTEC	ENSMUSG00000064210	Ano6	0.000281108	15	Cell_Surface	79.1667	6.89225	43.1177	5.93528
sTEC	ENSMUSG00000030842	Lamtor1	0.000287988	7	Unknown	87.5	7.81795	60.8337	7.24519
sTEC	ENSMUSG00000028381	Ugcg	0.000308506	4	Unknown	62.5	5.73259	27.8767	4.60945
sTEC	ENSMUSG00000029781	Fkbp9	0.000341436	6	Unknown	66.6667	7.37392	34.2597	6.04565
sTEC	ENSMUSG00000019846	Lama4	0.000376297	10	Unknown	58.3333	6.50949	22.5358	5.01958
sTEC	ENSMUSG00000033863	Klf9	0.000376297	19	Unknown	83.3333	7.57176	55.4494	6.03023
sTEC	ENSMUSG00000006360	Crip1	0.000385531	12	Unknown	100	8.81813	70.9944	8.02118
sTEC	ENSMUSG00000024538	Ppic	0.000411758	18	Unknown	66.6667	8.63417	36.6044	6.99643
sTEC	ENSMUSG00000051851	Cxx1c	0.000431431	X	Unknown	58.3333	6.33054	25.7924	5.02951
sTEC	ENSMUSG00000050705	2310061I04Rik	0.000444947	17	Unknown	54.1667	6.90168	26.6609	4.98859
sTEC	ENSMUSG00000022912	Pros1	0.000485702	16	Unknown	66.6667	7.39397	33.6518	5.81346
sTEC	ENSMUSG00000018906	P4ha2	0.000497388	11	Unknown	50	6.44907	19.2358	5.03432
sTEC	ENSMUSG00000025289	Prdx4	0.000518866	X	Unknown	75	7.28238	40.6426	6.55626
sTEC	ENSMUSG00000066406	Akap13	0.000560397	7	Unknown	87.5	8.72927	55.5797	6.93531
sTEC	ENSMUSG00000053477	Tcf4	0.000572228	18	Transcription_Factor	100	8.66252	73.0786	7.54761
sTEC	ENSMUSG00000008035	Mid1ip1	0.000573134	X	Unknown	45.8333	6.49238	18.7581	4.77165
sTEC	ENSMUSG00000022708	Zbtb20	0.000580027	16	Unknown	100	9.55729	71.3417	7.90825
sTEC	ENSMUSG00000022377	Asap1	0.000587076	15	Unknown	66.6667	6.71926	40.1216	5.39978
sTEC	ENSMUSG00000094724	Rnaset2b	0.000587457	17	Unknown	91.6667	6.78062	71.0378	5.72991
sTEC	ENSMUSG00000030272	Camk1	0.000605103	6	Unknown	58.3333	7.06394	18.6713	5.99856
sTEC	ENSMUSG00000033392	Clasp2	0.000624751	9	Unknown	87.5	5.99425	62.4403	5.32816
sTEC	ENSMUSG00000024063	Lbh	0.000672103	17	Unknown	70.8333	5.94373	35.9097	4.95198
sTEC	ENSMUSG00000030659	Nucb2	0.000688301	7	Unknown	70.8333	7.31055	39.34	5.95051
sTEC	ENSMUSG00000034487	Kdelc2	0.000695156	9	Unknown	50	6.5078	24.4898	4.89394
sTEC	ENSMUSG00000040605	Bace2	0.000697734	16	Unknown	58.3333	7.10178	19.9305	6.08434
sTEC	ENSMUSG00000021094	Dhrs7	0.000736053	12	Unknown	79.1667	7.87171	48.0243	6.95991
sTEC	ENSMUSG00000051615	Rap2a	0.000808048	14	Unknown	54.1667	6.84836	25.4885	5.00685
sTEC	ENSMUSG00000033066	Gas7	0.000903812	11	Unknown	87.5	8.9011	56.3613	8.05765
sTEC	ENSMUSG00000025026	Add3	0.000911128	19	Unknown	45.8333	7.4492	26.2701	5.01561
sTEC	ENSMUSG00000050234	Gja4	0.00095353	4	Unknown	54.1667	7.5524	26.2267	6.82813
sTEC	ENSMUSG00000021250	Fos	0.00110363	12	Transcription_Factor	87.5	12.2718	56.4481	10.6472
sTEC	ENSMUSG00000021759	Ppap2a	0.00115306	13	Unknown	70.8333	8.66082	42.0321	7.38803
sTEC	ENSMUSG00000046727	Cystm1	0.00124266	18	Unknown	66.6667	8.13836	35.5623	7.42635
sTEC	ENSMUSG00000022722	Arl6	0.00139776	16	Unknown	58.3333	6.64018	34.2597	5.49054
sTEC	ENSMUSG00000025647	Shisa5	0.00141571	9	Unknown	100	9.57998	79.6353	8.78407
sTEC	ENSMUSG00000016256	Ctsz	0.00157239	2	Unknown	87.5	9.97571	58.706	9.50838
sTEC	ENSMUSG00000029635	Cdk8	0.00168397	5	Unknown	70.8333	6.19235	43.3348	5.11472
sTEC	ENSMUSG00000022419	Deptor	0.00184864	15	Unknown	62.5	7.48738	28.1806	6.08846
sTEC	ENSMUSG00000003746	Man1a	0.00189668	10	Unknown	62.5	6.04927	30.8728	4.99915
sTEC	ENSMUSG00000031399	Fam3a	0.00190406	X	Unknown	54.1667	7.97854	32.0886	5.28182
sTEC	ENSMUSG00000028249	Sdcbp	0.00194141	4	Unknown	91.6667	8.97033	69.4312	7.60772
sTEC	ENSMUSG00000074622	Mafb	0.0020888	2	Transcription_Factor	66.6667	7.65739	33.782	6.81714
sTEC	ENSMUSG00000005078	Jkamp	0.00213399	12	Unknown	75	7.55372	48.8927	6.58658
sTEC	ENSMUSG00000034403	Pja1	0.00221673	X	Unknown	62.5	7.60679	41.5545	6.38923
sTEC	ENSMUSG00000053119	Chmp3	0.00224958	6	Unknown	79.1667	7.86049	57.0126	6.74952
sTEC	ENSMUSG00000009633	G0s2	0.00225691	1	Unknown	50	7.88273	23.5779	6.577
sTEC	ENSMUSG00000003363	Pld3	0.00238606	7	Unknown	79.1667	8.4834	53.0612	7.39897
sTEC	ENSMUSG00000030245	Golt1b	0.00240775	6	Unknown	79.1667	8.03941	50.3691	6.96273
sTEC	ENSMUSG00000037060	Prkcdbp	0.00261637	7	Unknown	91.6667	9.10717	51.8888	8.13085
sTEC	ENSMUSG00000026748	Plxdc2	0.00270971	2	Unknown	70.8333	7.66424	36.6479	6.49388
sTEC	ENSMUSG00000018819	Lsp1	0.00271423	7	Unknown	58.3333	7.49621	23.1871	7.39185
sTEC	ENSMUSG00000002900	Lamb1	0.00279393	12	Unknown	87.5	8.13074	48.0677	6.89495
sTEC	ENSMUSG00000026628	Atf3	0.00298597	1	Transcription_Factor	66.6667	10.1801	36.7347	8.70817
sTEC	ENSMUSG00000022816	Fstl1	0.00303121	16	Unknown	87.5	8.13687	51.3244	7.46377
sTEC	ENSMUSG00000029185	Fam114a1	0.00307879	5	Unknown	58.3333	6.80665	26.1398	5.23291
sTEC	ENSMUSG00000032353	Tmed3	0.00309192	9	Unknown	83.3333	9.10103	61.2679	7.78896
sTEC	ENSMUSG00000047714	Ppp1r2	0.00312868	16	Unknown	91.6667	7.38588	60.4863	6.83832
sTEC	ENSMUSG00000001025	S100a6	0.00312868	3	Unknown	95.8333	9.13911	65.6969	8.26333
sTEC	ENSMUSG00000009563	Tor2a	0.00317883	2	Unknown	58.3333	7.09218	33.9557	6.1198
sTEC	ENSMUSG00000004945	Tmem242	0.0032377	17	Unknown	79.1667	6.98967	61.0942	6.4474
sTEC	ENSMUSG00000026042	Col5a2	0.00331638	1	Unknown	58.3333	6.44604	18.6279	5.28534
sTEC	ENSMUSG00000039357	Fut11	0.00341635	14	Unknown	62.5	5.91939	31.4373	5.34354
sTEC	ENSMUSG00000028756	Pink1	0.00342857	4	Unknown	87.5	7.44803	50.152	6.40612
sTEC	ENSMUSG00000006362	Cbfa2t3	0.00350974	8	Transcription_Factor	66.6667	6.34962	30.8294	5.11408
sTEC	ENSMUSG00000037071	Scd1	0.00362024	19	Unknown	62.5	7.22515	31.2201	5.85397
sTEC	ENSMUSG00000027776	Il12a	0.00366886	3	Unknown	45.8333	6.83034	15.241	6.10803
sTEC	ENSMUSG00000007872	Id3	0.00373429	4	Transcription_Factor	91.6667	10.4724	61.0508	9.46157
sTEC	ENSMUSG00000025283	Sat1	0.00383671	X	Unknown	95.8333	9.92864	65.914	8.96425
sTEC	ENSMUSG00000018740	Slc25a35	0.00392517	11	Unknown	50	6.58843	25.4885	5.88762
sTEC	ENSMUSG00000042834	Nrep	0.00392835	18	Unknown	66.6667	8.77093	46.1572	7.77189
sTEC	ENSMUSG00000020773	Trim47	0.00437395	11	Unknown	66.6667	7.56873	35.9531	6.74468
sTEC	ENSMUSG00000020392	Cdkn2aipnl	0.00439267	11	Unknown	58.3333	6.40582	34.5202	5.62389
sTEC	ENSMUSG00000017707	Serinc3	0.00460668	2	Unknown	91.6667	7.14345	65.1324	5.83477
sTEC	ENSMUSG00000057530	Ece1	0.00464048	4	Cell_Surface	70.8333	8.29651	35.3018	7.46191
sTEC	ENSMUSG00000055447	Cd47	0.00472627	16	Unknown	100	9.54595	86.409	8.34177
sTEC	ENSMUSG00000004846	Plod3	0.0048485	5	Unknown	66.6667	5.40295	28.6583	5.10017
sTEC	ENSMUSG00000028413	B4galt1	0.00498086	4	Cell_Surface	87.5	8.26581	57.6639	7.01659
sTEC	ENSMUSG00000042675	Ypel3	0.00541269	7	Unknown	87.5	8.01224	58.8797	7.28202
sTEC	ENSMUSG00000060935	AI597468	0.00721806	10	Unknown	70.8333	6.24191	41.4242	5.71759
sTEC	ENSMUSG00000024835	Coro1b	0.00722338	19	Unknown	91.6667	8.75761	65.8706	8.01655
sTEC	ENSMUSG00000075010	AW112010	0.00770792	19	Unknown	79.1667	9.40377	51.8888	8.53265
sTEC	ENSMUSG00000030161	Gabarapl1	0.00793111	6	Unknown	70.8333	6.34606	48.5888	5.55288
sTEC	ENSMUSG00000038668	Lpar1	0.00800461	4	Cell_Surface	79.1667	7.9081	46.0703	6.8419
sTEC	ENSMUSG00000007891	Ctsd	0.00810719	7	Unknown	91.6667	8.86569	66.5219	7.96885
sTEC	ENSMUSG00000021939	Ctsb	0.00836873	14	Unknown	95.8333	9.8989	84.759	8.82087
sTEC	ENSMUSG00000072235	Tuba1a	0.00848988	15	Unknown	91.6667	9.90682	78.5497	9.22743
sTEC	ENSMUSG00000079426	Arpc4	0.00903228	6	Unknown	91.6667	7.82932	73.4694	7.35249
sTEC	ENSMUSG00000020484	Xbp1	0.00934206	11	Transcription_Factor	91.6667	8.19029	63.6561	7.6455
sTEC	ENSMUSG00000019920	Lims1	0.0093878	10	Unknown	91.6667	7.69289	63.9166	7.55339
sTEC	ENSMUSG00000031591	Asah1	0.0103139	8	Unknown	79.1667	6.74144	50.2388	6.14428
sTEC	ENSMUSG00000032475	Nck1	0.0109306	9	Unknown	70.8333	7.144	48.4585	6.13405
sTEC	ENSMUSG00000063065	Mapk3	0.0109306	7	Unknown	75	6.24584	43.9861	5.36007
sTEC	ENSMUSG00000017493	Igfbp4	0.01195	11	Unknown	95.8333	9.51919	50.0651	8.7289
sTEC	ENSMUSG00000022257	Laptm4b	0.012006	15	Unknown	70.8333	7.66905	44.9414	6.72381
sTEC	ENSMUSG00000027803	Wwtr1	0.0125807	3	Unknown	54.1667	6.71646	27.0517	5.60242
sTEC	ENSMUSG00000031207	Msn	0.0126644	X	Unknown	79.1667	7.83857	55.3626	7.29322
sTEC	ENSMUSG00000025351	Cd63	0.0129695	10	Cell_Surface	100	11.3609	89.5788	10.34
sTEC	ENSMUSG00000005413	Hmox1	0.0131381	8	Unknown	58.3333	7.90288	28.3543	7.05381
sTEC	ENSMUSG00000026072	Il1r1	0.0132283	1	Cell_Surface	66.6667	6.87435	32.7399	5.54127
sTEC	ENSMUSG00000037822	Smim14	0.0132283	5	Unknown	91.6667	8.48227	73.3825	7.85971
sTEC	ENSMUSG00000040562	Gstm2	0.0136727	3	Unknown	66.6667	8.13574	35.8228	7.80967
sTEC	ENSMUSG00000029470	P2rx4	0.0139633	5	Unknown	70.8333	7.55958	44.5506	7.01648
sTEC	ENSMUSG00000028583	Pdpn	0.0143257	4	Unknown	91.6667	7.81949	53.1046	7.59809
sTEC	ENSMUSG00000043445	Pgp	0.014559	17	Unknown	66.6667	6.8704	40.1216	6.16426
sTEC	ENSMUSG00000004105	Angptl2	0.0154387	2	Unknown	58.3333	6.77527	28.1806	6.30882
sTEC	ENSMUSG00000027642	Rpn2	0.0156002	2	Unknown	91.6667	8.71051	74.3378	8.16292
sTEC	ENSMUSG00000029007	Agtrap	0.0157203	4	Unknown	62.5	6.38333	34.8676	5.7588
sTEC	ENSMUSG00000056220	Pla2g4a	0.0157372	1	Unknown	70.8333	7.46896	38.515	6.8058
sTEC	ENSMUSG00000002059	Rab34	0.0163276	11	Unknown	66.6667	7.5695	37.9939	7.02882
sTEC	ENSMUSG00000028643	Ccdc23	0.0165166	4	Unknown	75	6.9864	46.3309	5.98254
sTEC	ENSMUSG00000015094	Npdc1	0.0167775	2	Unknown	79.1667	7.96277	51.0638	7.10785
sTEC	ENSMUSG00000079111	Kdelr2	0.017056	5	Unknown	95.8333	8.9742	84.9327	8.10209
sTEC	ENSMUSG00000046402	Rbp1	0.0172605	9	Unknown	87.5	8.32072	47.8506	8.07819
sTEC	ENSMUSG00000030824	Nucb1	0.0180022	7	Unknown	91.6667	8.73361	75.9444	8.07013
sTEC	ENSMUSG00000029622	Arpc1b	0.0181775	5	Unknown	95.8333	8.99305	75.2497	8.4302
sTEC	ENSMUSG00000046671	Mtfr1l	0.018344	4	Unknown	62.5	7.13666	42.5966	6.25752
sTEC	ENSMUSG00000071662	Polr2g	0.0185073	19	Unknown	87.5	7.36618	61.9192	7.41528
sTEC	ENSMUSG00000027669	Gnb4	0.0187711	3	Unknown	62.5	7.45651	42.5966	7.24588
sTEC	ENSMUSG00000001833	Sept7	0.0192516	9	Unknown	91.6667	8.69211	78.7668	7.95942
sTEC	ENSMUSG00000050043	Tmx2	0.0194159	2	Unknown	66.6667	6.83046	45.9401	6.1649
sTEC	ENSMUSG00000029076	Sdf4	0.0202845	4	Unknown	91.6667	9.55909	80.9813	8.55873
sTEC	ENSMUSG00000044786	Zfp36	0.0206973	7	Unknown	87.5	9.54891	66.6522	8.15646
sTEC	ENSMUSG00000032667	Pon2	0.0211112	6	Unknown	62.5	6.99323	43.5519	6.28738
sTEC	ENSMUSG00000023830	Igf2r	0.0216211	17	Cell_Surface	83.3333	6.23003	50.2822	5.52872
sTEC	ENSMUSG00000048756	Foxo3	0.0217294	10	Transcription_Factor	79.1667	6.71766	52.8007	6.15275
sTEC	ENSMUSG00000053113	Socs3	0.021955	11	Unknown	70.8333	8.30683	38.6887	6.98328
sTEC	ENSMUSG00000036908	Unc93b1	0.0221168	19	Unknown	62.5	7.27694	36.4742	6.28583
sTEC	ENSMUSG00000024349	Tmem173	0.0221672	18	Unknown	70.8333	8.22311	47.0256	7.5858
sTEC	ENSMUSG00000034659	Tmem109	0.0224972	19	Unknown	70.8333	7.32974	47.6335	6.53569
sTEC	ENSMUSG00000029455	Aldh2	0.023404	5	Unknown	87.5	8.03705	53.1481	7.56766
sTEC	ENSMUSG00000052681	Rap1b	0.0246391	10	Unknown	87.5	7.89982	71.9496	7.24516
sTEC	ENSMUSG00000020585	Laptm4a	0.0246391	12	Unknown	100	10.8021	92.7486	9.96297
sTEC	ENSMUSG00000030342	Cd9	0.0247238	6	Cell_Surface	100	10.892	87.7985	10.0024
sTEC	ENSMUSG00000028455	Stoml2	0.0260717	4	Unknown	70.8333	7.45388	48.8059	6.80029
sTEC	ENSMUSG00000024066	Xdh	0.0261872	17	Unknown	70.8333	6.78141	35.6926	6.31607
sTEC	ENSMUSG00000070348	Ccnd1	0.0262445	7	Unknown	62.5	7.55482	34.1728	6.83482
sTEC	ENSMUSG00000030847	Bag3	0.0281544	7	Unknown	66.6667	7.22108	42.8571	6.33032
sTEC	ENSMUSG00000028677	Rnf220	0.0283147	4	Unknown	66.6667	7.34914	44.6809	6.5358
sTEC	ENSMUSG00000038387	Rras	0.0284228	7	Unknown	87.5	7.75091	56.7521	7.16351
sTEC	ENSMUSG00000022684	Bfar	0.0288473	16	Unknown	75	7.44202	44.7677	6.39377
sTEC	ENSMUSG00000023961	Enpp4	0.0308288	17	Unknown	75	7.42455	49.1533	6.9883
sTEC	ENSMUSG00000038991	Txndc5	0.0353532	13	Unknown	70.8333	7.1791	45.0716	6.43769
sTEC	ENSMUSG00000062352	Itgb1bp1	0.0357125	12	Unknown	58.3333	6.94208	35.736	6.47281
sTEC	ENSMUSG00000028967	Errfi1	0.0377735	4	Unknown	66.6667	7.07181	38.515	6.48943
sTEC	ENSMUSG00000031770	Herpud1	0.0383346	8	Unknown	83.3333	9.52676	68.0851	8.34435
sTEC	ENSMUSG00000021477	Ctsl	0.0385408	13	Unknown	100	11.6355	81.6761	11.9418
sTEC	ENSMUSG00000090258	Churc1	0.0387598	12	Unknown	87.5	7.34325	68.4325	6.98298
sTEC	ENSMUSG00000030826	Bcat2	0.0390928	7	Unknown	62.5	7.30098	42.4663	7.03141
sTEC	ENSMUSG00000053898	Ech1	0.0396347	7	Unknown	91.6667	8.31242	69.7785	8.16637
sTEC	ENSMUSG00000028822	Tmem50a	0.0398018	4	Unknown	91.6667	9.51212	81.5892	8.57725
sTEC	ENSMUSG00000026411	Tmem9	0.041467	1	Unknown	62.5	7.70231	43.0308	6.95255
sTEC	ENSMUSG00000040813	Tex264	0.0428223	9	Unknown	79.1667	7.57614	55.4494	7.23331
sTEC	ENSMUSG00000006519	Cyba	0.0430071	8	Unknown	87.5	9.20858	61.2245	9.5589
sTEC	ENSMUSG00000028757	Ddost	0.0430071	4	Unknown	87.5	9.33843	76.8563	8.63491
sTEC	ENSMUSG00000015869	Prpsap1	0.0430925	11	Unknown	83.3333	7.27361	51.9323	6.89956
sTEC	ENSMUSG00000091971	Hspa1a	0.0430966	17	Unknown	91.6667	10.5263	71.472	9.66901
sTEC	ENSMUSG00000038418	Egr1	0.0432831	18	Transcription_Factor	87.5	9.73894	57.8376	8.80586
sTEC	ENSMUSG00000032383	Ppib	0.0439462	9	Unknown	91.6667	8.73973	83.2393	8.09504
sTEC	ENSMUSG00000040652	Oaz2	0.0439462	9	Unknown	75	7.6274	51.5415	6.74934
sTEC	ENSMUSG00000015837	Sqstm1	0.0440405	11	Unknown	100	9.57133	83.2393	8.91297
sTEC	ENSMUSG00000033420	Antxr1	0.0449897	6	Cell_Surface	62.5	7.54628	35.5189	6.13972
sTEC	ENSMUSG00000013698	Pea15a	0.0469565	1	Unknown	70.8333	7.13061	51.498	6.74425
sTEC	ENSMUSG00000050737	Ptges	0.0473701	2	Unknown	75	7.14584	40.0782	6.80489
sTEC	ENSMUSG00000031556	Tm2d2	0.0487754	8	Unknown	79.1667	8.71753	60.2258	7.78689
sTEC	ENSMUSG00000019579	D17Wsu104e	0.0487754	17	Unknown	75	7.97668	62.7877	7.47403
sTEC	ENSMUSG00000034708	Grn	0.0489725	11	Unknown	95.8333	8.9886	63.9166	8.26505
sTEC	ENSMUSG00000003423	Pih1d1	0.0530117	7	Unknown	62.5	6.63381	43.2045	6.56476
sTEC	ENSMUSG00000074247	Dda1	0.0545599	8	Unknown	66.6667	7.34134	53.4954	6.75965
sTEC	ENSMUSG00000075415	Fnbp1	0.054797	2	Unknown	83.3333	7.3474	59.5745	7.42477
sTEC	ENSMUSG00000028618	Tmem59	0.0566324	4	Unknown	100	10.2707	89.3617	9.69988
sTEC	ENSMUSG00000026547	Tagln2	0.0599645	1	Unknown	87.5	9.12531	66.1746	8.87255
sTEC	ENSMUSG00000035227	Spcs2	0.0605504	7	Unknown	100	8.79353	80.4168	8.72655
sTEC	ENSMUSG00000030341	Tnfrsf1a	0.0612867	6	Cell_Surface	83.3333	7.16666	56.6652	6.65161
sTEC	ENSMUSG00000063480	Nhp2l1	0.0622273	15	Unknown	83.3333	7.76694	68.3022	7.28609
sTEC	ENSMUSG00000003161	Sri	0.0626621	5	Unknown	95.8333	9.02669	82.0669	8.66369
sTEC	ENSMUSG00000041481	Serpina3g	0.0636041	12	Unknown	58.3333	8.77227	44.7677	8.31571
sTEC	ENSMUSG00000068391	Chrac1	0.0639721	15	Unknown	75	8.02265	61.6587	7.41227
sTEC	ENSMUSG00000006356	Crip2	0.0655491	12	Unknown	79.1667	9.81548	64.8285	9.17024
sTEC	ENSMUSG00000009549	Srp14	0.0661745	2	Unknown	95.8333	8.55756	81.1116	8.41009
sTEC	ENSMUSG00000020978	Klhdc2	0.0661745	12	Unknown	62.5	7.13633	48.8927	6.60197
sTEC	ENSMUSG00000023367	Tmem176a	0.0661927	6	Unknown	100	10.9909	93.0091	10.6348
sTEC	ENSMUSG00000090877	Hspa1b	0.0662675	17	Unknown	83.3333	6.67476	58.6192	6.1339
sTEC	ENSMUSG00000057388	Mrpl18	0.0715967	17	Unknown	83.3333	7.91896	67.8246	7.53226
sTEC	ENSMUSG00000020315	Sptbn1	0.0784486	11	Unknown	91.6667	8.17763	69.4312	7.52402
sTEC	ENSMUSG00000047547	Cltb	0.0793257	13	Unknown	87.5	7.57272	61.5284	7.09319
sTEC	ENSMUSG00000031532	Tmem66	0.0808676	8	Unknown	91.6667	9.02024	77.4642	8.93462
sTEC	ENSMUSG00000021248	Tmed10	0.0828082	12	Unknown	95.8333	9.62336	87.7117	9.06347
sTEC	ENSMUSG00000056737	Capg	0.0844551	6	Unknown	87.5	9.45401	72.3838	9.01337
sTEC	ENSMUSG00000064215	Ifi27	0.0844551	12	Unknown	95.8333	8.75454	73.5562	8.92771
sTEC	ENSMUSG00000003545	Fosb	0.0877798	7	Transcription_Factor	70.8333	8.70323	37.6031	7.06985
sTEC	ENSMUSG00000028063	Lmna	0.0881752	3	Unknown	95.8333	9.22111	78.8102	8.32438
sTEC	ENSMUSG00000028691	Prdx1	0.0885656	4	Unknown	100	10.4457	91.8802	9.82725
sTEC	ENSMUSG00000031783	Polr2c	0.091112	8	Unknown	70.8333	7.36385	54.6244	7.09234
sTEC	ENSMUSG00000030298	Sec13	0.0920921	6	Unknown	75	8.74058	67.6075	8.31411
sTEC	ENSMUSG00000057069	Ero1lb	0.092197	13	Unknown	66.6667	7.68799	44.6809	6.7278
sTEC	ENSMUSG00000033880	Lgals3bp	0.0922581	11	Unknown	91.6667	9.94112	80.634	9.15961
sTEC	ENSMUSG00000041084	Ostc	0.0927063	3	Unknown	83.3333	8.33584	69.0404	7.91665
sTEC	ENSMUSG00000025930	Msc	0.0930966	1	Unknown	66.6667	7.87782	45.3322	7.24709
sTEC	ENSMUSG00000022553	Maf1	0.0947878	15	Unknown	70.8333	7.36771	53.6257	6.92991
sTEC	ENSMUSG00000031447	Lamp1	0.097509	8	Cell_Surface	95.8333	9.74522	88.1893	9.13646
sTEC	ENSMUSG00000019087	Atp6ap1	0.0997247	X	Unknown	87.5	8.88541	72.4273	8.34801
sTEC	ENSMUSG00000031422	Morf4l2	0.0997903	X	Unknown	91.6667	8.71392	80.3734	8.3127
sTEC	ENSMUSG00000000957	Mmp14	0.0997903	14	Unknown	83.3333	8.15218	70.2996	7.47176
sTEC	ENSMUSG00000005483	Dnajb1	0.102089	8	Unknown	83.3333	9.53929	60.3561	8.62091
sTEC	ENSMUSG00000033318	Gstt2	0.102183	10	Unknown	66.6667	7.49239	44.8111	7.19463
sTEC	ENSMUSG00000030057	Cnbp	0.102845	6	Unknown	100	10.0978	91.0986	9.7723
sTEC	ENSMUSG00000027940	Tpm3	0.104769	3	Unknown	100	8.81952	85.888	8.41475
sTEC	ENSMUSG00000025066	Sfr1	0.105245	19	Unknown	91.6667	7.52884	74.1641	7.44778
sTEC	ENSMUSG00000078812	Eif5a	0.109067	11	Unknown	100	10.1628	91.5762	10.1128
sTEC	ENSMUSG00000024646	Cyb5	0.110945	18	Unknown	87.5	9.39917	78.5931	8.77408
sTEC	ENSMUSG00000052040	Klf13	0.113364	7	Unknown	83.3333	7.57087	53.1046	7.25334
sTEC	ENSMUSG00000029465	Arpc3	0.116838	5	Unknown	91.6667	8.3122	79.6787	8.13484
sTEC	ENSMUSG00000020571	Pdia6	0.117065	12	Unknown	87.5	10.0293	80.1563	9.44863
sTEC	ENSMUSG00000016541	Atxn10	0.118055	15	Unknown	87.5	8.39902	74.3812	8.23426
sTEC	ENSMUSG00000025132	Arhgdia	0.118144	11	Unknown	95.8333	8.64421	83.8472	8.2543
sTEC	ENSMUSG00000037601	Nme1	0.118745	11	Unknown	87.5	7.52168	69.7785	7.68211
sTEC	ENSMUSG00000006024	Napa	0.118941	7	Unknown	91.6667	8.92772	73.6865	8.68978
sTEC	ENSMUSG00000023067	Cdkn1a	0.121876	17	Unknown	62.5	7.71669	37.7334	8.3891
sTEC	ENSMUSG00000002985	Apoe	0.125669	7	Unknown	91.6667	12.9479	66.8693	12.4463
sTEC	ENSMUSG00000001473	Tubb6	0.126282	18	Unknown	62.5	8.23399	41.9453	8.42067
sTEC	ENSMUSG00000031431	Tsc22d3	0.12641	X	Transcription_Factor	87.5	8.13355	67.7812	7.73804
sTEC	ENSMUSG00000002015	Bcap31	0.126681	X	Unknown	91.6667	9.07516	79.0708	8.68409
sTEC	ENSMUSG00000032575	Manf	0.127371	9	Unknown	83.3333	8.58066	69.9088	8.28839
sTEC	ENSMUSG00000021877	Arf4	0.132511	14	Unknown	91.6667	9.04237	83.2393	8.72153
sTEC	ENSMUSG00000021427	Ssr1	0.134289	13	Unknown	91.6667	8.66594	79.8958	8.51498
sTEC	ENSMUSG00000063856	Gpx1	0.137036	9	Unknown	100	10.3116	90.3604	9.88543
sTEC	ENSMUSG00000031502	Col4a1	0.142145	8	Unknown	87.5	8.15237	60.7034	7.26511
sTEC	ENSMUSG00000052837	Junb	0.146751	8	Transcription_Factor	95.8333	10.7499	85.8446	9.94656
sTEC	ENSMUSG00000060992	Copz1	0.149548	15	Unknown	79.1667	8.02089	62.614	7.82242
sTEC	ENSMUSG00000029761	Cald1	0.153205	6	Unknown	95.8333	9.06187	60.4863	8.58142
sTEC	ENSMUSG00000041736	Tspo	0.154859	15	Unknown	95.8333	10.1772	82.8919	9.71694
sTEC	ENSMUSG00000020321	Mdh1	0.157983	11	Unknown	100	9.43605	86.1051	9.79335
sTEC	ENSMUSG00000075602	Ly6a	0.162073	15	Unknown	100	11.5628	67.5206	11.6224
sTEC	ENSMUSG00000041515	Irf8	0.163852	8	Transcription_Factor	83.3333	8.2654	59.0534	8.43043
sTEC	ENSMUSG00000003032	Klf4	0.167569	4	Transcription_Factor	83.3333	7.86678	46.7651	7.39402
sTEC	ENSMUSG00000063229	Ldha	0.197076	7	Unknown	91.6667	9.24495	79.7655	9.55241
sTEC	ENSMUSG00000023942	Slc29a1	0.198672	17	Unknown	83.3333	8.51328	60.3561	8.30457
sTEC	ENSMUSG00000052684	Jun	0.209423	4	Transcription_Factor	100	11.8883	84.5853	11.0678
sTEC	ENSMUSG00000020423	Btg2	0.219746	1	Unknown	79.1667	10.2933	62.31	9.3562
Perinatal cTEC	ENSMUSG00000020793	Galr2	4.56232e-231	11	Unknown	58.5859	7.1271	1.52603	2.80812
Perinatal cTEC	ENSMUSG00000057880	Abat	6.73342e-219	16	Unknown	90.9091	7.83143	7.98923	4.10505
Perinatal cTEC	ENSMUSG00000025129	Ppp1r27	2.7266e-192	11	Unknown	69.697	8.85746	4.53321	5.04686
Perinatal cTEC	ENSMUSG00000053647	Gper1	3.51326e-189	5	Unknown	66.6667	7.14855	2.1544	4.65774
Perinatal cTEC	ENSMUSG00000030701	Plekhb1	3.1777e-171	7	Unknown	90.9091	8.83669	11.535	5.44408
Perinatal cTEC	ENSMUSG00000022415	Syngr1	1.0425e-163	15	Unknown	96.9697	9.14629	14.6768	5.82154
Perinatal cTEC	ENSMUSG00000000290	Itgb2	1.06596e-162	10	Cell_Surface	62.6263	6.68208	3.09695	3.4805
Perinatal cTEC	ENSMUSG00000006567	Atp7b	3.02078e-161	8	Unknown	67.6768	6.22339	4.80251	2.77095
Perinatal cTEC	ENSMUSG00000037379	Spon2	3.21573e-159	5	Unknown	88.8889	9.30192	8.03411	5.6994
Perinatal cTEC	ENSMUSG00000072423	Psmb11	2.20824e-155	14	Unknown	96.9697	12.5893	15.3501	8.91114
Perinatal cTEC	ENSMUSG00000056174	Col8a2	3.81873e-152	4	Unknown	93.9394	5.9403	9.87433	3.16576
Perinatal cTEC	ENSMUSG00000090206	Tepp	6.56012e-151	8	Unknown	65.6566	5.57461	3.00718	3.24172
Perinatal cTEC	ENSMUSG00000087080	Gm12199	1.26849e-150	11	Unknown	69.697	6.36449	4.53321	3.55865
Perinatal cTEC	ENSMUSG00000026188	Tmem169	5.54009e-150	1	Unknown	53.5354	5.72876	2.06463	1.76423
Perinatal cTEC	ENSMUSG00000022122	Ednrb	4.70387e-149	14	Unknown	62.6263	6.19814	2.73788	2.48617
Perinatal cTEC	ENSMUSG00000001281	Itgb7	3.48487e-140	15	Cell_Surface	54.5455	6.41669	3.2316	2.67247
Perinatal cTEC	ENSMUSG00000025551	Fgf14	1.26714e-137	14	Unknown	91.9192	7.39449	11.535	3.98661
Perinatal cTEC	ENSMUSG00000051048	P4ha3	1.41767e-137	7	Unknown	100	8.10279	13.2406	5.3079
Perinatal cTEC	ENSMUSG00000028179	Cth	1.85955e-135	3	Unknown	88.8889	7.51777	10.772	4.63064
Perinatal cTEC	ENSMUSG00000037016	Frem2	8.97523e-127	3	Unknown	65.6566	6.25601	5.47576	2.76342
Perinatal cTEC	ENSMUSG00000045573	Penk	1.0827e-125	4	Unknown	90.9091	8.92762	11.8043	6.95477
Perinatal cTEC	ENSMUSG00000043461	Sptssb	2.1983e-123	3	Unknown	71.7172	7.11796	5.1167	4.39885
Perinatal cTEC	ENSMUSG00000074912	Gm14207	4.87921e-123	2	Unknown	96.9697	8.20034	15.6643	5.01873
Perinatal cTEC	ENSMUSG00000000305	Cdh4	2.74132e-122	2	Unknown	97.9798	9.0409	21.7684	5.30037
Perinatal cTEC	ENSMUSG00000030510	Cers3	2.88532e-120	7	Unknown	76.7677	7.60486	8.66248	4.48532
Perinatal cTEC	ENSMUSG00000030087	Klf15	2.01662e-119	6	Transcription_Factor	82.8283	6.97205	9.02154	3.79685
Perinatal cTEC	ENSMUSG00000027314	Dll4	8.0416e-117	2	Unknown	82.8283	7.63178	9.20108	4.60121
Perinatal cTEC	ENSMUSG00000042684	Npl	6.95775e-116	1	Unknown	95.9596	7.87798	14.3627	5.17672
Perinatal cTEC	ENSMUSG00000025911	Adhfe1	1.24507e-115	1	Unknown	66.6667	6.58605	6.91203	3.90711
Perinatal cTEC	ENSMUSG00000046275	Tusc5	1.55175e-109	11	Unknown	61.6162	6.87209	3.90485	3.95581
Perinatal cTEC	ENSMUSG00000015396	Cd83	1.36203e-107	13	Unknown	85.8586	9.74115	14.5422	6.04866
Perinatal cTEC	ENSMUSG00000078670	Fam174b	3.623e-107	7	Unknown	66.6667	5.92658	4.53321	2.92201
Perinatal cTEC	ENSMUSG00000034854	Mfsd12	6.66999e-107	10	Unknown	87.8788	7.12836	15.1706	4.18223
Perinatal cTEC	ENSMUSG00000022054	Nefm	9.0331e-107	14	Unknown	69.697	7.8837	6.1939	4.5837
Perinatal cTEC	ENSMUSG00000062760	1810041L15Rik	1.71311e-105	15	Unknown	73.7374	7.03116	8.39318	3.50349
Perinatal cTEC	ENSMUSG00000004473	Clec11a	4.97537e-105	7	Unknown	81.8182	8.31135	11.7145	5.29116
Perinatal cTEC	ENSMUSG00000040181	Fmo1	2.48794e-104	1	Unknown	98.9899	8.55671	23.7882	5.9865
Perinatal cTEC	ENSMUSG00000000753	Serpinf1	8.50103e-104	11	Unknown	90.9091	9.6227	14.1831	6.91011
Perinatal cTEC	ENSMUSG00000020261	Slc36a1	8.93635e-102	11	Unknown	87.8788	6.47994	12.6571	3.71163
Perinatal cTEC	ENSMUSG00000043099	Hic1	8.29695e-99	11	Transcription_Factor	76.7677	6.31765	9.20108	3.41592
Perinatal cTEC	ENSMUSG00000037086	1110059M19Rik	2.89585e-98	X	Unknown	56.5657	6.91971	4.93716	4.04068
Perinatal cTEC	ENSMUSG00000020424	Gatsl3	1.60036e-96	11	Unknown	94.9495	9.21563	21.544	6.2079
Perinatal cTEC	ENSMUSG00000079355	Ackr4	6.31097e-93	9	Unknown	93.9394	8.99509	17.6391	7.00824
Perinatal cTEC	ENSMUSG00000086606	Gm13205	1.68747e-92	4	Unknown	77.7778	6.96686	11.4452	4.08461
Perinatal cTEC	ENSMUSG00000039873	Neurl2	6.09031e-91	2	Unknown	68.6869	4.45976	6.41831	2.08188
Perinatal cTEC	ENSMUSG00000003849	Nqo1	4.24513e-89	8	Unknown	100	10.6375	32.5404	7.05767
Perinatal cTEC	ENSMUSG00000006179	Prss16	5.10367e-89	13	Unknown	100	13.3582	38.9587	9.80388
Perinatal cTEC	ENSMUSG00000068874	Selenbp1	2.84271e-88	3	Unknown	76.7677	7.34285	10.2783	5.1286
Perinatal cTEC	ENSMUSG00000021483	Cdk20	3.23204e-85	13	Unknown	87.8788	8.33193	17.4596	5.76443
Perinatal cTEC	ENSMUSG00000036510	Cdh8	4.60631e-85	8	Unknown	57.5758	6.69736	5.52065	3.19739
Perinatal cTEC	ENSMUSG00000027378	Nphp1	1.05779e-84	2	Unknown	89.899	7.91949	20.8259	4.80838
Perinatal cTEC	ENSMUSG00000032348	Gsta4	5.49703e-84	9	Unknown	93.9394	8.92497	19.9282	7.0926
Perinatal cTEC	ENSMUSG00000028139	Riiad1	7.15689e-84	3	Unknown	84.8485	6.65361	12.7469	4.12575
Perinatal cTEC	ENSMUSG00000039252	Lgi2	1.42315e-82	5	Unknown	66.6667	5.61638	6.05925	3.25072
Perinatal cTEC	ENSMUSG00000037260	Hgsnat	6.24771e-82	8	Unknown	98.9899	8.80549	31.7325	5.6813
Perinatal cTEC	ENSMUSG00000047428	Dlk2	7.39746e-81	17	Unknown	77.7778	7.63995	11.8492	5.33234
Perinatal cTEC	ENSMUSG00000019966	Kitl	2.9334e-79	10	Unknown	90.9091	6.52854	16.158	4.21891
Perinatal cTEC	ENSMUSG00000061353	Cxcl12	5.24946e-79	6	Unknown	100	10.9148	36.4452	8.49388
Perinatal cTEC	ENSMUSG00000030088	Aldh1l1	3.74011e-77	6	Unknown	79.798	7.45411	13.7792	4.81087
Perinatal cTEC	ENSMUSG00000085827	Gm11290	6.29074e-77	13	Unknown	52.5253	5.40235	4.12926	2.73836
Perinatal cTEC	ENSMUSG00000050910	Cdr2l	2.43961e-76	11	Unknown	79.798	7.2762	12.4776	4.68801
Perinatal cTEC	ENSMUSG00000026980	Ly75	3.82684e-76	2	Unknown	100	9.42194	39.3178	6.62086
Perinatal cTEC	ENSMUSG00000027016	Zfp385b	3.82684e-76	2	Unknown	73.7374	5.85364	8.88689	3.09486
Perinatal cTEC	ENSMUSG00000047712	Ust	9.25156e-76	10	Unknown	69.697	5.53161	9.64991	3.37149
Perinatal cTEC	ENSMUSG00000037624	Kcnk2	9.42395e-76	1	Cell_Surface	94.9495	4.69076	14.5871	2.87985
Perinatal cTEC	ENSMUSG00000067144	Slc22a7	1.78723e-73	17	Unknown	71.7172	8.1192	12.1185	5.45146
Perinatal cTEC	ENSMUSG00000036298	Slc2a13	1.00077e-72	15	Unknown	65.6566	5.56917	6.37343	2.78698
Perinatal cTEC	ENSMUSG00000033720	Sfxn5	9.1055e-71	6	Unknown	84.8485	7.16646	18.1329	5.08391
Perinatal cTEC	ENSMUSG00000030352	Tspan9	3.57789e-70	6	Unknown	93.9394	7.03768	18.7163	5.02944
Perinatal cTEC	ENSMUSG00000038725	Pkhd1l1	8.72712e-70	15	Unknown	67.6768	5.63046	8.12388	3.07316
Perinatal cTEC	ENSMUSG00000051041	Olfml1	8.66507e-69	7	Unknown	85.8586	7.55517	16.6068	5.7024
Perinatal cTEC	ENSMUSG00000039236	Isg20	1.03236e-68	7	Unknown	94.9495	11.1234	30.2962	7.77674
Perinatal cTEC	ENSMUSG00000024640	Psat1	2.04982e-68	19	Unknown	100	9.24105	31.3285	6.52585
Perinatal cTEC	ENSMUSG00000028669	Pithd1	6.65682e-68	4	Unknown	100	10.6669	38.465	7.19287
Perinatal cTEC	ENSMUSG00000085745	Gm14372	2.59367e-67	7	Unknown	36.3636	5.45548	2.60323	2.52025
Perinatal cTEC	ENSMUSG00000027574	Nkain4	4.18864e-66	2	Unknown	89.899	8.36001	18.2675	6.28
Perinatal cTEC	ENSMUSG00000012017	Scarf2	7.62379e-66	16	Unknown	74.7475	6.52306	12.9264	4.86657
Perinatal cTEC	ENSMUSG00000036545	Adamts2	9.88186e-66	11	Unknown	62.6263	6.06582	8.43806	3.63598
Perinatal cTEC	ENSMUSG00000038587	Akap12	2.88388e-65	10	Unknown	98.9899	7.99995	27.0197	5.82432
Perinatal cTEC	ENSMUSG00000009248	Ascl2	6.70475e-65	7	Transcription_Factor	43.4343	5.74007	3.45601	2.6405
Perinatal cTEC	ENSMUSG00000037580	Gch1	1.10208e-64	14	Unknown	82.8283	8.3582	18.4022	5.39945
Perinatal cTEC	ENSMUSG00000050520	Cldn8	2.06817e-64	16	Unknown	53.5354	5.63068	4.66786	2.88878
Perinatal cTEC	ENSMUSG00000038576	Susd4	4.81271e-64	1	Unknown	70.7071	5.98188	8.39318	3.42119
Perinatal cTEC	ENSMUSG00000058297	Spock2	2.86099e-63	10	Unknown	92.9293	7.73486	25.3591	5.62257
Perinatal cTEC	ENSMUSG00000048285	Frmd6	1.03923e-62	12	Unknown	92.9293	8.43068	31.7325	5.75857
Perinatal cTEC	ENSMUSG00000029205	Chrna9	4.9906e-62	5	Unknown	44.4444	6.84976	4.75763	3.74685
Perinatal cTEC	ENSMUSG00000018648	Dusp14	6.00441e-62	11	Unknown	85.8586	7.81297	18.6715	5.78399
Perinatal cTEC	ENSMUSG00000062563	Cys1	1.75023e-61	12	Unknown	55.5556	5.29473	5.56553	3.83763
Perinatal cTEC	ENSMUSG00000017697	Ada	2.0365e-60	2	Cell_Surface	71.7172	7.72914	14.6768	5.22104
Perinatal cTEC	ENSMUSG00000052105	Soga2	2.22806e-59	17	Unknown	55.5556	4.95569	5.70018	2.56398
Perinatal cTEC	ENSMUSG00000039982	Dtx4	2.72286e-59	19	Unknown	62.6263	5.52542	8.66248	3.49373
Perinatal cTEC	ENSMUSG00000023092	Fhl1	1.17251e-58	X	Unknown	52.5253	5.44665	5.83483	3.10849
Perinatal cTEC	ENSMUSG00000081769	Gm12216	2.77825e-58	11	Unknown	93.9394	8.63048	30.7002	6.23318
Perinatal cTEC	ENSMUSG00000009292	Trpm2	5.00186e-58	10	Unknown	80.8081	8.02672	19.7487	5.12329
Perinatal cTEC	ENSMUSG00000062257	Opcml	8.76761e-58	9	Unknown	52.5253	5.35781	5.83483	2.98663
Perinatal cTEC	ENSMUSG00000028024	Enpep	6.60493e-57	3	Unknown	64.6465	5.93528	8.57271	4.33117
Perinatal cTEC	ENSMUSG00000034021	Pds5b	1.98281e-56	5	Unknown	90.9091	9.44649	29.0395	6.15077
Perinatal cTEC	ENSMUSG00000040289	Hey1	3.94842e-55	3	Transcription_Factor	94.9495	7.44602	24.1921	6.03108
Perinatal cTEC	ENSMUSG00000024085	Man2a1	6.16109e-55	17	Unknown	94.9495	6.76164	27.6032	4.86102
Perinatal cTEC	ENSMUSG00000044707	Ccnjl	8.2434e-55	11	Unknown	79.798	6.62755	12.9264	4.49284
Perinatal cTEC	ENSMUSG00000044349	Snhg11	2.08784e-53	2	Unknown	69.697	8.23649	17.684	6.48435
Perinatal cTEC	ENSMUSG00000058173	Smco4	3.30919e-53	9	Unknown	95.9596	6.884	25.4039	4.88132
Perinatal cTEC	ENSMUSG00000033068	Entpd6	6.18489e-53	2	Cell_Surface	84.8485	6.98926	20.9156	4.67352
Perinatal cTEC	ENSMUSG00000020811	Wscd1	6.60365e-53	11	Unknown	91.9192	8.16852	22.2621	6.33177
Perinatal cTEC	ENSMUSG00000003541	Ier3	3.22269e-52	17	Unknown	94.9495	9.58628	31.553	7.31805
Perinatal cTEC	ENSMUSG00000048826	Dact2	8.09437e-52	17	Unknown	100	8.89165	40.2603	5.91545
Perinatal cTEC	ENSMUSG00000028385	Snx30	8.09437e-52	4	Unknown	94.9495	7.88103	32.1364	5.3878
Perinatal cTEC	ENSMUSG00000002058	Unc119	1.86669e-51	11	Unknown	95.9596	8.24278	30.2513	6.37412
Perinatal cTEC	ENSMUSG00000017734	Dbndd2	2.36871e-51	2	Unknown	73.7374	4.34224	17.9982	2.80646
Perinatal cTEC	ENSMUSG00000000794	Kcnn3	3.12689e-51	3	Unknown	98.9899	8.32276	29.3537	5.67749
Perinatal cTEC	ENSMUSG00000021068	Nin	3.28285e-51	12	Unknown	80.8081	6.45495	17.9982	4.22034
Perinatal cTEC	ENSMUSG00000020284	1810043G02Rik	8.01628e-51	10	Unknown	91.9192	7.70368	22.8456	5.69085
Perinatal cTEC	ENSMUSG00000040875	Osbpl10	9.79037e-51	9	Unknown	91.9192	7.96994	27.5583	5.92423
Perinatal cTEC	ENSMUSG00000079434	Neu2	1.06161e-50	1	Unknown	39.3939	6.44183	3.68043	3.82805
Perinatal cTEC	ENSMUSG00000042340	Ctf1	1.39933e-50	7	Unknown	94.9495	8.06021	28.5458	6.0474
Perinatal cTEC	ENSMUSG00000026594	Ralgps2	7.62862e-50	1	Unknown	85.8586	6.72691	23.2496	4.53919
Perinatal cTEC	ENSMUSG00000013089	Etv5	1.36273e-49	16	Transcription_Factor	51.5152	5.06049	6.14901	2.79463
Perinatal cTEC	ENSMUSG00000078161	BC007180	1.36273e-49	3	Unknown	45.4545	5.45767	5.6553	3.33474
Perinatal cTEC	ENSMUSG00000031740	Mmp2	1.95794e-49	8	Unknown	78.7879	8.27397	21.7235	6.51406
Perinatal cTEC	ENSMUSG00000027634	Ndrg3	3.83976e-49	2	Unknown	98.9899	9.36734	47.4865	6.87375
Perinatal cTEC	ENSMUSG00000023235	Ccl25	6.01835e-49	8	Unknown	94.9495	12.9524	35.4578	10.4323
Perinatal cTEC	ENSMUSG00000027227	Sord	9.36382e-49	2	Unknown	91.9192	7.51625	28.3662	5.90649
Perinatal cTEC	ENSMUSG00000029330	Cds1	1.66957e-48	5	Unknown	87.8788	7.48117	25.3591	5.32115
Perinatal cTEC	ENSMUSG00000040998	Npnt	4.9808e-48	3	Unknown	72.7273	6.5565	13.8241	4.55237
Perinatal cTEC	ENSMUSG00000060961	Slc4a4	5.14385e-48	5	Unknown	62.6263	5.48328	10.2783	3.46154
Perinatal cTEC	ENSMUSG00000021474	Sfxn1	5.78341e-48	13	Unknown	98.9899	8.96909	39.1831	6.81875
Perinatal cTEC	ENSMUSG00000020605	Hs1bp3	7.5999e-48	12	Unknown	55.5556	5.43027	9.24596	3.80438
Perinatal cTEC	ENSMUSG00000038141	Tmem181a	1.00663e-47	17	Unknown	96.9697	6.30846	37.8815	4.20089
Perinatal cTEC	ENSMUSG00000022947	Cbr3	1.42613e-47	16	Unknown	80.8081	7.27706	20.018	5.54481
Perinatal cTEC	ENSMUSG00000032440	Tgfbr2	1.97691e-47	9	Cell_Surface	86.8687	6.25086	21.2298	4.56936
Perinatal cTEC	ENSMUSG00000027339	Rassf2	4.65394e-47	2	Unknown	98.9899	7.25412	33.8869	5.16942
Perinatal cTEC	ENSMUSG00000024909	Efemp2	5.74095e-47	19	Unknown	83.8384	7.42878	20.018	5.76921
Perinatal cTEC	ENSMUSG00000023968	Crip3	2.21149e-46	17	Unknown	89.899	11.2318	28.456	8.65779
Perinatal cTEC	ENSMUSG00000033767	D930015E06Rik	3.63295e-46	3	Unknown	100	9.49668	49.3268	6.92042
Perinatal cTEC	ENSMUSG00000085184	4933439K11Rik	3.40979e-45	1	Unknown	88.8889	6.72768	20.1975	4.7996
Perinatal cTEC	ENSMUSG00000061288	Taok3	5.56238e-45	5	Unknown	83.8384	6.60033	23.07	4.7638
Perinatal cTEC	ENSMUSG00000033419	Snap91	6.36107e-45	9	Unknown	75.7576	6.71726	15.5296	4.45235
Perinatal cTEC	ENSMUSG00000078870	Gm14410	1.09839e-44	2	Unknown	82.8283	4.85761	23.3842	3.14317
Perinatal cTEC	ENSMUSG00000023055	Calcoco1	2.04977e-44	15	Unknown	96.9697	7.59532	40.1706	5.5148
Perinatal cTEC	ENSMUSG00000034424	Gcsh	1.33603e-43	8	Unknown	91.9192	8.00837	29.7127	5.98326
Perinatal cTEC	ENSMUSG00000021591	Glrx	1.33603e-43	13	Unknown	66.6667	5.8904	13.6445	4.62302
Perinatal cTEC	ENSMUSG00000031865	Dctn1	7.83839e-43	6	Unknown	100	9.49053	50	6.60852
Perinatal cTEC	ENSMUSG00000026090	2010300C02Rik	1.34776e-42	1	Unknown	76.7677	5.49126	12.8366	3.65623
Perinatal cTEC	ENSMUSG00000037034	Pax1	1.62743e-42	2	Transcription_Factor	100	9.05568	50.2244	6.79231
Perinatal cTEC	ENSMUSG00000015766	Eps8	2.29434e-42	6	Unknown	83.8384	7.07574	24.9102	5.61189
Perinatal cTEC	ENSMUSG00000020792	Exoc7	2.53509e-42	11	Unknown	100	9.64129	45.2424	6.80092
Perinatal cTEC	ENSMUSG00000041120	Nbl1	2.83834e-42	4	Unknown	84.8485	7.08372	27.0197	6.15652
Perinatal cTEC	ENSMUSG00000097324	Mir143hg	2.08477e-41	18	Unknown	86.8687	6.5133	21.4542	5.09349
Perinatal cTEC	ENSMUSG00000021287	Xrcc3	4.5658e-40	12	Unknown	46.4646	5.88826	7.22621	3.66605
Perinatal cTEC	ENSMUSG00000087521	AI646519	6.10416e-40	2	Unknown	96.9697	6.0003	32.8097	5.13085
Perinatal cTEC	ENSMUSG00000020614	Fam20a	7.97636e-40	11	Unknown	43.4343	5.5274	6.68761	3.5047
Perinatal cTEC	ENSMUSG00000021286	Zfyve21	1.48752e-39	12	Unknown	98.9899	9.18572	39.8564	7.48176
Perinatal cTEC	ENSMUSG00000033763	Mtss1l	2.26291e-39	8	Unknown	86.8687	5.80615	26.2118	4.17532
Perinatal cTEC	ENSMUSG00000041046	Ramp3	2.45703e-39	11	Cell_Surface	51.5152	7.31966	9.38061	4.62497
Perinatal cTEC	ENSMUSG00000052331	Ankrd44	2.79267e-39	1	Unknown	71.7172	5.69557	15.6194	4.44161
Perinatal cTEC	ENSMUSG00000024538	Ppic	7.32986e-39	18	Unknown	98.9899	8.72709	34.1562	6.87569
Perinatal cTEC	ENSMUSG00000027784	Ppm1l	1.85096e-38	3	Unknown	74.7475	6.603	19.8384	4.71444
Perinatal cTEC	ENSMUSG00000095419	Gm14328	1.86876e-38	18	Unknown	100	4.38506	49.8654	2.25041
Perinatal cTEC	ENSMUSG00000041773	Enc1	2.08174e-38	13	Unknown	69.697	6.60836	14.8115	4.80234
Perinatal cTEC	ENSMUSG00000086320	Gm12840	2.621e-38	4	Unknown	88.8889	3.59942	25.0898	2.594
Perinatal cTEC	ENSMUSG00000025190	Got1	1.52791e-37	19	Unknown	84.8485	7.59089	26.0323	5.36721
Perinatal cTEC	ENSMUSG00000035069	Oma1	1.74204e-37	4	Unknown	94.9495	8.73558	38.7792	6.38174
Perinatal cTEC	ENSMUSG00000026778	Prkcq	1.85486e-37	2	Unknown	48.4848	5.16591	6.23878	3.70059
Perinatal cTEC	ENSMUSG00000024900	Cpt1a	3.14613e-37	19	Unknown	91.9192	7.40184	34.4704	6.10792
Perinatal cTEC	ENSMUSG00000022454	Nell2	4.7203e-37	15	Unknown	50.5051	5.91834	7.09156	3.68633
Perinatal cTEC	ENSMUSG00000022378	Fam49b	5.35038e-37	15	Unknown	98.9899	7.79731	41.3375	5.72522
Perinatal cTEC	ENSMUSG00000037211	Spry1	5.98076e-37	3	Unknown	58.5859	5.91088	11.0862	3.99678
Perinatal cTEC	ENSMUSG00000030554	Synm	7.82855e-37	7	Unknown	81.8182	7.09184	27.0197	5.81404
Perinatal cTEC	ENSMUSG00000017754	Pltp	9.77125e-37	2	Unknown	100	12.0178	58.7074	9.66687
Perinatal cTEC	ENSMUSG00000054723	Vmac	1.35293e-36	17	Unknown	90.9091	6.85715	28.2316	5.61867
Perinatal cTEC	ENSMUSG00000018378	Cuedc1	1.37051e-36	11	Unknown	93.9394	6.81081	40.0359	5.35992
Perinatal cTEC	ENSMUSG00000045659	Plekha7	3.17691e-36	7	Unknown	84.8485	6.19058	22.9803	4.86015
Perinatal cTEC	ENSMUSG00000091191	Gm17334	3.26537e-36	11	Unknown	75.7576	5.20327	20.1526	3.58133
Perinatal cTEC	ENSMUSG00000057751	Megf6	8.06389e-36	4	Unknown	80.8081	7.03997	24.4614	5.66657
Perinatal cTEC	ENSMUSG00000051098	Mblac2	1.12493e-35	13	Unknown	69.697	7.06363	17.8636	5.2951
Perinatal cTEC	ENSMUSG00000027332	Ivd	1.5346e-35	2	Unknown	88.8889	7.5447	35.1885	5.97336
Perinatal cTEC	ENSMUSG00000066026	Dhrs3	1.69869e-35	4	Unknown	98.9899	9.53473	48.6086	7.73212
Perinatal cTEC	ENSMUSG00000046733	Gprc5a	2.88216e-35	6	Unknown	44.4444	5.90959	7.67504	3.9599
Perinatal cTEC	ENSMUSG00000026187	Xrcc5	3.7666e-35	1	Unknown	92.9293	6.9562	31.6427	5.42912
Perinatal cTEC	ENSMUSG00000048756	Foxo3	1.34829e-34	10	Transcription_Factor	92.9293	7.85194	51.3016	6.00923
Perinatal cTEC	ENSMUSG00000032560	Dnajc13	1.3487e-34	9	Unknown	95.9596	8.40882	43.3124	6.59146
Perinatal cTEC	ENSMUSG00000021265	Slc25a29	1.74598e-34	12	Unknown	61.6162	7.23599	14.4524	5.06862
Perinatal cTEC	ENSMUSG00000042426	Dhx29	2.67362e-34	13	Unknown	94.9495	6.99703	33.2585	5.53923
Perinatal cTEC	ENSMUSG00000021676	Iqgap2	3.40267e-34	13	Cell_Surface	62.6263	6.15361	13.2855	4.12748
Perinatal cTEC	ENSMUSG00000063887	Nlgn1	9.54384e-34	3	Cell_Surface	73.7374	5.5829	16.8761	3.9061
Perinatal cTEC	ENSMUSG00000021226	Acot2	1.89915e-33	12	Unknown	95.9596	7.07433	40.6643	5.88628
Perinatal cTEC	ENSMUSG00000028386	Slc46a2	2.7509e-33	4	Cell_Surface	100	10.763	48.3393	9.02259
Perinatal cTEC	ENSMUSG00000036225	Kctd1	3.09192e-33	18	Unknown	98.9899	6.63285	35.8169	5.52422
Perinatal cTEC	ENSMUSG00000045877	4933415A04Rik	3.31795e-33	11	Unknown	67.6768	5.98881	13.7343	4.61424
Perinatal cTEC	ENSMUSG00000022747	St3gal6	5.20752e-33	16	Unknown	88.8889	7.21445	27.3339	5.91355
Perinatal cTEC	ENSMUSG00000047842	Diras2	6.07854e-33	13	Unknown	67.6768	5.9823	17.2352	4.79136
Perinatal cTEC	ENSMUSG00000031700	Gpt2	8.2519e-33	8	Unknown	75.7576	6.3451	22.6212	4.76018
Perinatal cTEC	ENSMUSG00000029312	Klhl8	1.47821e-32	5	Unknown	68.6869	5.98515	17.1903	4.28009
Perinatal cTEC	ENSMUSG00000032263	Bckdhb	2.08507e-32	9	Unknown	83.8384	6.71092	25.5835	5.1372
Perinatal cTEC	ENSMUSG00000008575	Nfib	3.73694e-32	4	Transcription_Factor	100	8.39061	53.9497	7.09422
Perinatal cTEC	ENSMUSG00000026383	Epb4.1l5	3.80593e-32	1	Unknown	82.8283	6.2276	27.289	5.1171
Perinatal cTEC	ENSMUSG00000040729	AK129341	4.70524e-32	9	Unknown	62.6263	4.81829	13.3303	3.04792
Perinatal cTEC	ENSMUSG00000020042	Btbd11	6.02929e-32	10	Unknown	89.899	6.60589	31.4632	5.08705
Perinatal cTEC	ENSMUSG00000031342	Gpm6b	6.17199e-32	X	Unknown	60.6061	6.68848	12.2531	5.74573
Perinatal cTEC	ENSMUSG00000046027	Stard5	6.88165e-32	7	Unknown	96.9697	8.08287	45.1526	6.82295
Perinatal cTEC	ENSMUSG00000057614	Gnai1	7.40157e-32	5	Unknown	51.5152	5.60576	9.11131	3.87567
Perinatal cTEC	ENSMUSG00000001995	Sipa1l2	7.67836e-32	8	Unknown	57.5758	5.69226	12.1634	3.64557
Perinatal cTEC	ENSMUSG00000022476	Polr3h	1.2142e-31	15	Unknown	79.798	6.86033	21.8133	5.37557
Perinatal cTEC	ENSMUSG00000060487	Samd5	1.228e-31	10	Unknown	50.5051	4.91626	9.02154	3.34265
Perinatal cTEC	ENSMUSG00000034903	Cobll1	1.24725e-31	2	Unknown	69.697	4.83434	16.2478	3.02477
Perinatal cTEC	ENSMUSG00000038128	Camk4	1.36231e-31	18	Unknown	98.9899	8.03332	33.3932	5.85903
Perinatal cTEC	ENSMUSG00000036109	Mbnl3	1.70489e-31	X	Unknown	62.6263	6.02114	12.0287	3.94498
Perinatal cTEC	ENSMUSG00000022665	Ccdc80	1.90285e-31	16	Unknown	93.9394	8.99538	38.8241	7.68062
Perinatal cTEC	ENSMUSG00000050323	Ndufaf6	2.40678e-31	4	Unknown	66.6667	6.52876	15.2154	4.68849
Perinatal cTEC	ENSMUSG00000024944	Arl2	2.80551e-31	19	Unknown	93.9394	7.77038	38.7792	6.45084
Perinatal cTEC	ENSMUSG00000029201	Ugdh	3.31708e-31	5	Unknown	91.9192	7.03459	31.912	5.28396
Perinatal cTEC	ENSMUSG00000046876	Atxn1	3.59864e-31	13	Unknown	98.9899	7.54155	50.8977	6.89019
Perinatal cTEC	ENSMUSG00000020829	Slc46a1	3.84236e-31	11	Cell_Surface	72.7273	6.93965	19.7038	5.71508
Perinatal cTEC	ENSMUSG00000032702	Kank1	4.01127e-31	19	Unknown	73.7374	5.418	19.4345	4.35039
Perinatal cTEC	ENSMUSG00000036856	Wnt4	4.29037e-31	4	Cell_Surface	98.9899	9.71816	58.079	7.99453
Perinatal cTEC	ENSMUSG00000001911	Nfix	4.74778e-31	8	Transcription_Factor	100	8.26988	69.7038	7.07592
Perinatal cTEC	ENSMUSG00000034751	Mast4	5.73689e-31	13	Unknown	100	8.09738	62.8366	6.57836
Perinatal cTEC	ENSMUSG00000036249	Rbm43	5.74204e-31	2	Unknown	84.8485	6.52563	27.7379	5.69082
Perinatal cTEC	ENSMUSG00000052085	Dock8	5.99839e-31	19	Unknown	59.596	4.95763	12.3429	3.62718
Perinatal cTEC	ENSMUSG00000042961	Egflam	6.34511e-31	15	Cell_Surface	47.4747	5.77902	9.47038	3.53572
Perinatal cTEC	ENSMUSG00000028776	Tinagl1	1.13934e-30	4	Unknown	91.9192	8.66491	38.7343	7.08388
Perinatal cTEC	ENSMUSG00000000253	Gmpr	1.13934e-30	13	Unknown	97.9798	9.17515	47.4865	7.93864
Perinatal cTEC	ENSMUSG00000034614	Pik3ip1	1.46947e-30	11	Unknown	92.9293	7.68935	43.5817	6.73955
Perinatal cTEC	ENSMUSG00000026430	Rassf5	1.54433e-30	1	Unknown	65.6566	5.86335	16.6517	4.10409
Perinatal cTEC	ENSMUSG00000025036	Sfxn2	5.60925e-30	19	Unknown	60.6061	6.25709	15.8887	4.63448
Perinatal cTEC	ENSMUSG00000029270	Fam69a	8.26874e-30	5	Unknown	93.9394	8.09027	44.8833	7.22708
Perinatal cTEC	ENSMUSG00000070858	Gm1673	8.51548e-30	5	Unknown	85.8586	5.70248	28.5907	4.61203
Perinatal cTEC	ENSMUSG00000038046	Rnmtl1	9.21992e-30	11	Unknown	64.6465	6.28824	13.6445	4.72538
Perinatal cTEC	ENSMUSG00000032563	Mrpl3	9.91728e-30	9	Unknown	100	8.52809	43.6266	6.9738
Perinatal cTEC	ENSMUSG00000026730	Pter	1.00532e-29	2	Unknown	58.5859	5.64674	13.2855	4.0808
Perinatal cTEC	ENSMUSG00000078350	Smim1	1.1804e-29	4	Unknown	62.6263	4.93563	14.3178	4.5207
Perinatal cTEC	ENSMUSG00000027739	Rab33b	1.29282e-29	3	Unknown	62.6263	5.19977	16.7415	3.83174
Perinatal cTEC	ENSMUSG00000017144	Rnd3	1.30986e-29	2	Unknown	93.9394	7.03026	35.2334	5.63975
Perinatal cTEC	ENSMUSG00000038884	A230050P20Rik	1.3164e-29	9	Unknown	86.8687	6.74388	29.8923	5.39985
Perinatal cTEC	ENSMUSG00000047067	Dusp28	1.39222e-29	1	Unknown	59.596	7.49196	17.9982	5.11072
Perinatal cTEC	ENSMUSG00000058709	Egln2	1.53941e-29	7	Unknown	92.9293	8.02509	43.1329	6.61863
Perinatal cTEC	ENSMUSG00000037325	Bbs7	7.56739e-29	3	Unknown	58.5859	5.63221	10.6822	3.46517
Perinatal cTEC	ENSMUSG00000021760	Gpx8	7.82891e-29	13	Unknown	83.8384	7.41039	29.0844	6.60447
Perinatal cTEC	ENSMUSG00000041308	Sntb2	1.47178e-28	8	Unknown	90.9091	7.43117	40.7092	6.45118
Perinatal cTEC	ENSMUSG00000027160	Ccdc34	1.87186e-28	2	Unknown	97.9798	7.20066	39.9013	5.61051
Perinatal cTEC	ENSMUSG00000048701	Ccdc6	2.24881e-28	10	Unknown	100	8.70886	48.3393	7.05577
Perinatal cTEC	ENSMUSG00000028709	Mob3c	2.28738e-28	4	Unknown	68.6869	6.44645	16.7864	4.92274
Perinatal cTEC	ENSMUSG00000017639	Rab11fip4	2.31946e-28	11	Unknown	87.8788	7.43754	34.5153	5.32788
Perinatal cTEC	ENSMUSG00000000861	Bcl11a	2.44786e-28	11	Unknown	86.8687	6.49937	31.1939	5.21356
Perinatal cTEC	ENSMUSG00000050064	Zfp697	2.48706e-28	3	Unknown	53.5354	5.33262	9.24596	3.46389
Perinatal cTEC	ENSMUSG00000078878	Gm14305	3.48324e-28	2	Unknown	78.7879	4.9447	26.6607	3.6802
Perinatal cTEC	ENSMUSG00000078877	Gm14295	3.59714e-28	2	Unknown	69.697	4.75395	18.1777	3.08503
Perinatal cTEC	ENSMUSG00000053553	3110082I17Rik	4.5777e-28	5	Unknown	66.6667	6.11559	16.8312	4.37133
Perinatal cTEC	ENSMUSG00000040209	Zfp704	4.72886e-28	3	Unknown	73.7374	5.64294	18.4919	4.50011
Perinatal cTEC	ENSMUSG00000026748	Plxdc2	5.55561e-28	2	Unknown	88.8889	7.03804	34.6948	6.48391
Perinatal cTEC	ENSMUSG00000027217	Tspan18	6.2188e-28	2	Unknown	58.5859	6.43748	14.4973	4.53353
Perinatal cTEC	ENSMUSG00000020099	Unc5b	8.09869e-28	10	Unknown	53.5354	4.89741	10.2334	3.77473
Perinatal cTEC	ENSMUSG00000097815	Gm26809	1.03721e-27	6	Unknown	96.9697	7.20155	52.693	6.2402
Perinatal cTEC	ENSMUSG00000026189	Pecr	1.11808e-27	1	Unknown	69.697	6.64271	19.3447	5.0872
Perinatal cTEC	ENSMUSG00000033565	Rbfox2	1.12573e-27	15	Unknown	93.9394	7.17542	37.5224	5.68309
Perinatal cTEC	ENSMUSG00000072949	Acot1	1.42709e-27	12	Unknown	81.8182	7.33745	26.167	6.14061
Perinatal cTEC	ENSMUSG00000063704	Mapk15	1.68658e-27	15	Unknown	51.5152	5.43019	11.3106	3.79476
Perinatal cTEC	ENSMUSG00000005233	Spc25	1.91706e-27	2	Unknown	79.798	6.91691	17.1903	5.54955
Perinatal cTEC	ENSMUSG00000032456	Nmnat3	1.92721e-27	9	Unknown	58.5859	6.16806	14.9461	4.76031
Perinatal cTEC	ENSMUSG00000026102	Inpp1	2.20276e-27	1	Unknown	95.9596	8.26923	46.9928	6.5555
Perinatal cTEC	ENSMUSG00000029153	Ociad2	2.99088e-27	5	Unknown	98.9899	9.35466	47.2172	7.16942
Perinatal cTEC	ENSMUSG00000078862	Gm14326	3.17769e-27	2	Unknown	73.7374	5.38676	20.9605	3.84996
Perinatal cTEC	ENSMUSG00000097390	Gm26785	3.30994e-27	17	Unknown	51.5152	4.90641	10.7271	3.40645
Perinatal cTEC	ENSMUSG00000035274	Tpbg	3.4193e-27	9	Cell_Surface	76.7677	5.64552	20.0628	4.53775
Perinatal cTEC	ENSMUSG00000052102	Gnpda1	3.83386e-27	18	Unknown	66.6667	6.29226	18.4919	4.89826
Perinatal cTEC	ENSMUSG00000013076	Amotl1	4.40578e-27	9	Unknown	100	8.70905	53.6804	7.84259
Perinatal cTEC	ENSMUSG00000020432	Tcn2	4.51819e-27	11	Unknown	96.9697	8.00144	44.5691	7.04911
Perinatal cTEC	ENSMUSG00000025538	Sumf2	4.97089e-27	5	Unknown	57.5758	6.01938	13.7343	4.49833
Perinatal cTEC	ENSMUSG00000002799	Jag2	4.98899e-27	12	Unknown	85.8586	6.45167	28.9946	5.61243
Perinatal cTEC	ENSMUSG00000109051	NA	5.33201e-27	NA	Unknown	54.5455	4.61305	10.0539	3.4405
Perinatal cTEC	ENSMUSG00000023959	Clic5	5.55669e-27	17	Unknown	74.7475	6.779	29.982	5.11987
Perinatal cTEC	ENSMUSG00000041548	Hspb8	6.05668e-27	5	Unknown	90.9091	7.38119	31.912	6.17172
Perinatal cTEC	ENSMUSG00000051934	Spats2	6.60441e-27	15	Unknown	93.9394	6.76735	34.5601	5.53692
Perinatal cTEC	ENSMUSG00000048677	Tpcn2	6.60441e-27	7	Unknown	58.5859	5.59886	11.8043	4.31949
Perinatal cTEC	ENSMUSG00000002059	Rab34	6.60441e-27	11	Unknown	88.8889	7.88609	36.0413	6.98315
Perinatal cTEC	ENSMUSG00000001521	Tulp3	7.18118e-27	6	Unknown	96.9697	7.67289	50.7181	6.6607
Perinatal cTEC	ENSMUSG00000095362	Gm14325	7.9119e-27	2	Unknown	79.798	5.48917	24.6858	3.94863
Perinatal cTEC	ENSMUSG00000026193	Fn1	1.33515e-26	1	Unknown	80.8081	7.01501	24.1921	6.03465
Perinatal cTEC	ENSMUSG00000052512	Nav2	1.37585e-26	7	Unknown	100	9.75583	71.2747	7.83429
Perinatal cTEC	ENSMUSG00000031613	Hpgd	1.91376e-26	8	Unknown	100	8.41141	46.6786	7.96413
Perinatal cTEC	ENSMUSG00000043639	Rbm20	2.36197e-26	19	Unknown	62.6263	5.83524	18.4022	4.34135
Perinatal cTEC	ENSMUSG00000018593	Sparc	3.22788e-26	11	Cell_Surface	94.9495	9.57946	50.1346	9.54525
Perinatal cTEC	ENSMUSG00000020085	Aifm2	4.13391e-26	10	Unknown	60.6061	5.93205	14.4524	4.72105
Perinatal cTEC	ENSMUSG00000059898	Dsc3	5.85043e-26	18	Unknown	88.8889	7.1531	42.4596	6.70661
Perinatal cTEC	ENSMUSG00000032898	Fbxo21	6.35487e-26	5	Unknown	68.6869	6.16612	16.8312	4.38007
Perinatal cTEC	ENSMUSG00000017764	Zswim1	9.77495e-26	2	Unknown	63.6364	5.68813	14.0485	4.095
Perinatal cTEC	ENSMUSG00000021193	Pitrm1	9.97864e-26	13	Unknown	87.8788	7.19457	36.1759	5.46781
Perinatal cTEC	ENSMUSG00000074622	Mafb	1.01332e-25	2	Transcription_Factor	86.8687	7.50713	31.7774	6.78985
Perinatal cTEC	ENSMUSG00000062604	Srpk2	1.04266e-25	5	Unknown	96.9697	8.37183	60.5027	6.75051
Perinatal cTEC	ENSMUSG00000030339	Ltbr	1.05502e-25	6	Unknown	94.9495	6.89617	42.3698	5.45494
Perinatal cTEC	ENSMUSG00000021186	Fbln5	1.09424e-25	12	Unknown	57.5758	6.08961	12.8815	5.18975
Perinatal cTEC	ENSMUSG00000036782	Klhl13	1.26233e-25	X	Unknown	54.5455	5.54246	10.3232	3.6874
Perinatal cTEC	ENSMUSG00000023885	Thbs2	1.26675e-25	17	Unknown	71.7172	5.69251	18.5368	4.99952
Perinatal cTEC	ENSMUSG00000030313	Dennd5b	1.4448e-25	6	Unknown	74.7475	5.31433	21.8133	4.52118
Perinatal cTEC	ENSMUSG00000058056	Palld	1.4485e-25	8	Unknown	100	8.60907	58.3483	7.88276
Perinatal cTEC	ENSMUSG00000025268	Maged2	1.45148e-25	X	Unknown	88.8889	7.91943	36.6697	6.82637
Perinatal cTEC	ENSMUSG00000023960	Enpp5	1.75719e-25	17	Unknown	94.9495	8.11825	54.219	7.12202
Perinatal cTEC	ENSMUSG00000009633	G0s2	2.39722e-25	1	Unknown	73.7374	6.77268	21.6338	6.5905
Perinatal cTEC	ENSMUSG00000000579	Dynlt1c	3.15457e-25	17	Unknown	96.9697	4.87203	44.4794	3.84974
Perinatal cTEC	ENSMUSG00000022433	Csnk1e	3.15457e-25	15	Unknown	80.8081	6.71566	28.2765	5.25815
Perinatal cTEC	ENSMUSG00000073643	Wdfy1	3.68636e-25	1	Unknown	73.7374	5.56897	18.8959	4.1985
Perinatal cTEC	ENSMUSG00000010651	Acaa1b	3.90362e-25	9	Unknown	63.6364	6.35364	18.447	5.15662
Perinatal cTEC	ENSMUSG00000024423	Impact	6.68958e-25	18	Unknown	89.899	7.87192	49.1023	6.53908
Perinatal cTEC	ENSMUSG00000059708	Akap17b	7.05391e-25	X	Unknown	50.5051	5.36068	11.7145	3.95774
Perinatal cTEC	ENSMUSG00000053644	Aldh7a1	8.04122e-25	18	Unknown	89.899	7.58486	37.8366	6.10474
Perinatal cTEC	ENSMUSG00000074280	Gm6166	8.80365e-25	9	Unknown	100	6.53611	66.158	4.3129
Perinatal cTEC	ENSMUSG00000037933	Bicd2	9.36416e-25	13	Unknown	78.7879	6.43024	28.7702	5.13483
Perinatal cTEC	ENSMUSG00000037761	Actr5	9.79258e-25	2	Unknown	60.6061	6.07112	13.8689	4.27274
Perinatal cTEC	ENSMUSG00000037295	Ldlrap1	1.01561e-24	4	Unknown	83.8384	6.58271	29.8474	5.32156
Perinatal cTEC	ENSMUSG00000028743	Akr7a5	1.02788e-24	4	Unknown	100	8.34045	44.0754	7.06555
Perinatal cTEC	ENSMUSG00000019528	Gyg	1.02788e-24	3	Unknown	87.8788	7.05647	29.9372	5.65002
Perinatal cTEC	ENSMUSG00000024269	Tpgs2	1.03515e-24	18	Unknown	67.6768	6.4085	21.3645	5.02267
Perinatal cTEC	ENSMUSG00000026791	Slc2a8	1.19408e-24	2	Unknown	57.5758	5.71582	14.4524	4.52754
Perinatal cTEC	ENSMUSG00000022661	Cd200	1.25033e-24	16	Unknown	96.9697	7.16598	47.8007	7.07318
Perinatal cTEC	ENSMUSG00000006378	Gcat	1.3383e-24	15	Unknown	96.9697	9.03951	39.228	7.33352
Perinatal cTEC	ENSMUSG00000023034	Nr4a1	1.35359e-24	15	Transcription_Factor	46.4646	7.96402	11.1759	5.42862
Perinatal cTEC	ENSMUSG00000020483	Dynll2	1.63339e-24	11	Unknown	100	8.30285	61.0862	6.29241
Perinatal cTEC	ENSMUSG00000029752	Asns	2.29978e-24	6	Unknown	77.7778	7.10711	23.7433	5.76836
Perinatal cTEC	ENSMUSG00000002308	Cd320	2.46782e-24	17	Unknown	87.8788	7.14649	26.526	5.90642
Perinatal cTEC	ENSMUSG00000026000	Lancl1	2.72062e-24	1	Unknown	97.9798	9.3437	49.9551	7.48845
Perinatal cTEC	ENSMUSG00000062619	2310039H08Rik	3.1194e-24	17	Unknown	90.9091	7.18974	36.535	5.77027
Perinatal cTEC	ENSMUSG00000078695	Cisd3	3.58535e-24	11	Unknown	83.8384	7.23223	37.2083	5.55036
Perinatal cTEC	ENSMUSG00000042496	Prdm10	4.03567e-24	9	Unknown	64.6465	5.83913	20.8259	4.39032
Perinatal cTEC	ENSMUSG00000025137	Pcyt2	4.69285e-24	11	Unknown	81.8182	7.01367	29.1293	5.56441
Perinatal cTEC	ENSMUSG00000038543	BC028528	5.04641e-24	3	Unknown	49.4949	5.62006	8.66248	5.23588
Perinatal cTEC	ENSMUSG00000038351	Sgsm2	5.07948e-24	11	Unknown	74.7475	4.89854	22.3968	4.02206
Perinatal cTEC	ENSMUSG00000074743	Thbd	5.18613e-24	2	Cell_Surface	52.5253	5.6658	12.2083	4.42271
Perinatal cTEC	ENSMUSG00000069729	Arid1b	6.63788e-24	17	Unknown	96.9697	6.39049	55.4309	5.01101
Perinatal cTEC	ENSMUSG00000030555	Ttc23	6.80888e-24	7	Unknown	82.8283	6.82325	30.4758	5.6442
Perinatal cTEC	ENSMUSG00000001123	Lgals9	6.88048e-24	11	Unknown	100	11.7184	72.6212	9.80296
Perinatal cTEC	ENSMUSG00000035443	Thyn1	7.46863e-24	9	Unknown	90.9091	6.47501	29.982	4.9847
Perinatal cTEC	ENSMUSG00000031112	2610018G03Rik	8.6776e-24	X	Unknown	77.7778	5.72414	25.4039	4.79173
Perinatal cTEC	ENSMUSG00000069601	Ank3	8.89015e-24	10	Cell_Surface	100	7.99093	68.3573	6.83571
Perinatal cTEC	ENSMUSG00000023030	Slc11a2	8.9896e-24	15	Cell_Surface	67.6768	5.32263	14.4973	4.06156
Perinatal cTEC	ENSMUSG00000062373	Tmem65	1.03204e-23	15	Unknown	71.7172	5.65718	21.9031	4.47593
Perinatal cTEC	ENSMUSG00000018537	Pcgf2	1.21496e-23	11	Unknown	81.8182	4.6482	26.3465	3.15156
Perinatal cTEC	ENSMUSG00000033059	Pygb	1.4996e-23	2	Unknown	79.798	6.98175	26.526	5.55358
Perinatal cTEC	ENSMUSG00000048040	Arxes2	1.58485e-23	X	Unknown	66.6667	5.541	12.4327	4.24162
Perinatal cTEC	ENSMUSG00000020541	Tom1l1	1.63255e-23	11	Unknown	88.8889	6.52144	32.8995	5.34644
Perinatal cTEC	ENSMUSG00000078922	Tgtp1	1.71258e-23	11	Unknown	94.9495	8.05202	43.1777	7.01561
Perinatal cTEC	ENSMUSG00000011837	Snapc2	1.72788e-23	8	Unknown	82.8283	7.30602	29.623	6.06458
Perinatal cTEC	ENSMUSG00000029032	Arhgef16	1.78673e-23	4	Unknown	88.8889	7.66807	38.8689	5.92935
Perinatal cTEC	ENSMUSG00000043421	Hilpda	1.8558e-23	6	Cell_Surface	67.6768	6.58395	17.7738	5.68332
Perinatal cTEC	ENSMUSG00000006442	Srm	2.09998e-23	4	Unknown	96.9697	8.37233	37.3429	6.72221
Perinatal cTEC	ENSMUSG00000089715	Cbx6	2.77366e-23	15	Unknown	95.9596	7.00014	48.3393	5.70359
Perinatal cTEC	ENSMUSG00000019960	Dusp6	2.92758e-23	10	Unknown	67.6768	6.56917	18.5368	5.13709
Perinatal cTEC	ENSMUSG00000001098	Kctd10	2.96538e-23	5	Unknown	67.6768	5.92425	22.8905	4.49083
Perinatal cTEC	ENSMUSG00000000811	Txnrd3	3.04431e-23	6	Unknown	79.798	6.64705	24.3268	5.02676
Perinatal cTEC	ENSMUSG00000032411	Tfdp2	4.21612e-23	9	Transcription_Factor	93.9394	7.23299	44.0305	6.24586
Perinatal cTEC	ENSMUSG00000029455	Aldh2	4.24357e-23	5	Unknown	91.9192	7.88275	51.7953	7.55795
Perinatal cTEC	ENSMUSG00000045636	Mtus1	5.15737e-23	8	Unknown	63.6364	5.49855	17.3698	4.94918
Perinatal cTEC	ENSMUSG00000042073	Abhd14b	6.07002e-23	9	Unknown	79.798	7.04276	31.8223	6.28297
Perinatal cTEC	ENSMUSG00000064326	Siva1	6.21765e-23	12	Unknown	94.9495	7.70356	38.1059	6.6465
Perinatal cTEC	ENSMUSG00000046402	Rbp1	6.608e-23	9	Unknown	92.9293	8.81164	46.2747	8.03801
Perinatal cTEC	ENSMUSG00000021493	Pdlim7	6.87469e-23	13	Unknown	92.9293	7.2935	39.1382	6.04503
Perinatal cTEC	ENSMUSG00000016386	Mpped2	9.05808e-23	2	Unknown	76.7677	6.19087	18.0431	4.87673
Perinatal cTEC	ENSMUSG00000038894	Irs2	1.08803e-22	8	Unknown	90.9091	6.54537	34.1562	5.5269
Perinatal cTEC	ENSMUSG00000074649	BC029722	1.39541e-22	2	Unknown	80.8081	5.27189	25.763	4.57746
Perinatal cTEC	ENSMUSG00000020844	Nxn	1.40198e-22	11	Unknown	98.9899	9.43013	56.4183	7.2837
Perinatal cTEC	ENSMUSG00000063931	Pepd	1.80746e-22	7	Unknown	91.9192	9.15765	44.1203	7.38984
Perinatal cTEC	ENSMUSG00000040699	Limd2	1.96631e-22	11	Unknown	92.9293	7.67274	40.3501	6.24541
Perinatal cTEC	ENSMUSG00000020956	Dtd2	2.19754e-22	12	Unknown	64.6465	6.34555	20.1975	5.37164
Perinatal cTEC	ENSMUSG00000052698	Tln2	2.2364e-22	9	Unknown	51.5152	5.26713	10.0987	4.27529
Perinatal cTEC	ENSMUSG00000050373	Snx21	2.64271e-22	2	Unknown	70.7071	6.6253	24.3716	5.7645
Perinatal cTEC	ENSMUSG00000022544	Fam86	2.65269e-22	16	Unknown	76.7677	7.14217	31.149	5.94469
Perinatal cTEC	ENSMUSG00000037712	Fermt2	2.71745e-22	14	Cell_Surface	85.8586	6.3741	35.9515	5.36251
Perinatal cTEC	ENSMUSG00000022120	Rnf219	2.71745e-22	14	Unknown	63.6364	5.68256	17.9982	4.30081
Perinatal cTEC	ENSMUSG00000022186	Oxct1	2.75131e-22	15	Unknown	95.9596	8.01612	45.8707	6.84618
Perinatal cTEC	ENSMUSG00000038648	Creb3l2	2.84962e-22	6	Transcription_Factor	92.9293	7.18324	42.0108	6.25722
Perinatal cTEC	ENSMUSG00000059482	2610301B20Rik	2.85697e-22	4	Unknown	80.8081	5.76855	27.3339	4.75506
Perinatal cTEC	ENSMUSG00000028708	Mknk1	3.01952e-22	4	Unknown	76.7677	5.74866	25.9425	4.73816
Perinatal cTEC	ENSMUSG00000031242	2610002M06Rik	3.28967e-22	X	Unknown	76.7677	5.81482	23.2496	4.35212
Perinatal cTEC	ENSMUSG00000038332	Sesn1	3.66744e-22	10	Unknown	72.7273	6.29239	27.4686	5.13456
Perinatal cTEC	ENSMUSG00000050017	Pitpnb	3.72662e-22	5	Unknown	95.9596	7.34476	45.5117	6.02474
Perinatal cTEC	ENSMUSG00000053477	Tcf4	4.1024e-22	18	Transcription_Factor	98.9899	8.55912	72.2172	7.49981
Perinatal cTEC	ENSMUSG00000024134	Six2	4.13355e-22	17	Transcription_Factor	87.8788	6.26302	30.6104	4.94639
Perinatal cTEC	ENSMUSG00000034875	Nudt19	4.33614e-22	7	Unknown	86.8687	7.10688	32.8995	6.05558
Perinatal cTEC	ENSMUSG00000021477	Ctsl	4.62853e-22	13	Unknown	100	13.858	81.0592	11.7486
Perinatal cTEC	ENSMUSG00000038205	Prkab2	5.26507e-22	3	Unknown	52.5253	5.03629	12.9713	4.55896
Perinatal cTEC	ENSMUSG00000062929	Cfl2	5.54488e-22	12	Unknown	98.9899	7.69609	50	6.18632
Perinatal cTEC	ENSMUSG00000039328	Rnf122	5.83033e-22	8	Unknown	82.8283	6.71845	32.1813	5.40877
Perinatal cTEC	ENSMUSG00000037410	Tbc1d2b	6.28273e-22	9	Unknown	73.7374	5.95201	26.5709	4.95279
Perinatal cTEC	ENSMUSG00000095567	Noc2l	6.71273e-22	4	Unknown	89.899	7.08808	31.3734	5.70145
Perinatal cTEC	ENSMUSG00000001482	Def8	6.78327e-22	8	Unknown	62.6263	5.95967	18.1777	4.74103
Perinatal cTEC	ENSMUSG00000005973	Rcn1	8.70057e-22	2	Unknown	98.9899	8.34993	50.9874	6.92828
Perinatal cTEC	ENSMUSG00000043300	B3galnt1	9.26164e-22	3	Unknown	63.6364	5.78724	17.7289	4.64173
Perinatal cTEC	ENSMUSG00000045664	Cdc42ep2	9.66167e-22	19	Unknown	69.697	7.07718	23.3393	5.99977
Perinatal cTEC	ENSMUSG00000071856	Mcc	9.66167e-22	18	Unknown	88.8889	6.36801	36.4004	5.73405
Perinatal cTEC	ENSMUSG00000034449	Dhrs11	9.70633e-22	11	Unknown	53.5354	5.23055	14.9013	3.52659
Perinatal cTEC	ENSMUSG00000047767	Atg16l2	9.89424e-22	7	Unknown	61.6162	6.16396	20.1077	4.18164
Perinatal cTEC	ENSMUSG00000046897	Zfp740	1.06377e-21	15	Unknown	76.7677	5.66973	24.6858	4.80954
Perinatal cTEC	ENSMUSG00000039197	Adk	1.11593e-21	14	Unknown	85.8586	6.56227	33.9767	5.88749
Perinatal cTEC	ENSMUSG00000001473	Tubb6	1.15188e-21	18	Unknown	96.9697	10.0508	39.7217	8.27759
Perinatal cTEC	ENSMUSG00000029287	Tgfbr3	1.17907e-21	5	Unknown	67.6768	5.7599	27.8725	5.55283
Perinatal cTEC	ENSMUSG00000021876	Rnase4	1.34791e-21	14	Unknown	86.8687	8.64099	43.0431	8.43983
Perinatal cTEC	ENSMUSG00000020520	Galnt10	1.35002e-21	11	Unknown	66.6667	5.18721	18.1777	4.16204
Perinatal cTEC	ENSMUSG00000059486	Kbtbd2	1.5219e-21	6	Unknown	79.798	6.18323	27.7379	4.95028
Perinatal cTEC	ENSMUSG00000048772	Tmem53	1.53482e-21	4	Unknown	71.7172	7.07661	27.7828	6.29701
Perinatal cTEC	ENSMUSG00000015597	Zfp318	1.64606e-21	17	Unknown	84.8485	7.14287	34.6499	5.74956
Perinatal cTEC	ENSMUSG00000020877	Scrn2	1.85098e-21	11	Unknown	70.7071	7.29817	23.3842	5.54994
Perinatal cTEC	ENSMUSG00000026278	Bok	1.93823e-21	1	Unknown	97.9798	8.59858	37.0736	7.21996
Perinatal cTEC	ENSMUSG00000095105	Edaradd	2.36211e-21	13	Unknown	93.9394	8.31469	44.2101	7.21745
Perinatal cTEC	ENSMUSG00000040964	Arhgef10l	2.47752e-21	4	Unknown	77.7778	6.88551	32.8995	5.66284
Perinatal cTEC	ENSMUSG00000090150	Acad11	2.91566e-21	9	Unknown	72.7273	6.06823	25.1795	5.28944
Perinatal cTEC	ENSMUSG00000033174	Mgll	3.06276e-21	6	Unknown	83.8384	8.04339	32.3609	7.55931
Perinatal cTEC	ENSMUSG00000024044	Epb4.1l3	3.4217e-21	17	Unknown	97.9798	8.12626	41.5619	6.0936
Perinatal cTEC	ENSMUSG00000028737	Aldh4a1	3.84702e-21	4	Unknown	92.9293	6.34812	42.9982	5.2535
Perinatal cTEC	ENSMUSG00000058013	Sept11	4.07188e-21	5	Unknown	97.9798	8.46818	54.1741	7.08228
Perinatal cTEC	ENSMUSG00000067586	S1pr3	4.12451e-21	13	Unknown	89.899	7.95646	29.4434	6.78857
Perinatal cTEC	ENSMUSG00000025104	Hdgfrp3	4.6904e-21	7	Unknown	92.9293	5.97874	34.8743	5.22909
Perinatal cTEC	ENSMUSG00000017737	Mmp9	4.73611e-21	2	Unknown	86.8687	8.5709	29.3088	7.08219
Perinatal cTEC	ENSMUSG00000038013	Wipf2	4.75688e-21	11	Unknown	81.8182	5.94312	34.7397	5.04928
Perinatal cTEC	ENSMUSG00000024253	Dync2li1	5.49612e-21	17	Unknown	78.7879	6.91485	27.6481	5.88374
Perinatal cTEC	ENSMUSG00000089876	Tmem102	6.48397e-21	11	Cell_Surface	80.8081	7.42978	30.4309	6.15249
Perinatal cTEC	ENSMUSG00000039232	Stx11	9.50316e-21	10	Unknown	87.8788	7.26209	32.7199	5.75986
Perinatal cTEC	ENSMUSG00000000085	Scmh1	1.35173e-20	4	Unknown	85.8586	6.45322	32.316	5.70313
Perinatal cTEC	ENSMUSG00000022018	Rgcc	1.47671e-20	14	Unknown	63.6364	7.58541	26.6158	7.32381
Perinatal cTEC	ENSMUSG00000037017	Zscan21	1.54152e-20	5	Transcription_Factor	79.798	6.714	25.763	5.57307
Perinatal cTEC	ENSMUSG00000002057	Foxn1	1.60534e-20	11	Transcription_Factor	100	8.10368	48.6086	6.45015
Perinatal cTEC	ENSMUSG00000001435	Col18a1	1.72099e-20	10	Unknown	82.8283	7.00943	35.7271	6.07115
Perinatal cTEC	ENSMUSG00000039450	Dcxr	1.76567e-20	11	Unknown	100	9.67249	59.8294	8.23671
Perinatal cTEC	ENSMUSG00000042359	Osbpl6	1.94612e-20	2	Unknown	69.697	6.14725	22.6661	5.19017
Perinatal cTEC	ENSMUSG00000043207	Zmpste24	2.08937e-20	4	Unknown	88.8889	7.17697	43.0431	6.2361
Perinatal cTEC	ENSMUSG00000012296	Tjap1	2.20031e-20	17	Unknown	70.7071	5.76832	23.1598	4.1698
Perinatal cTEC	ENSMUSG00000021665	Hexb	2.55692e-20	13	Unknown	97.9798	8.57717	59.4255	8.06003
Perinatal cTEC	ENSMUSG00000062661	Ncs1	2.59765e-20	2	Unknown	74.7475	6.75844	22.0826	5.44344
Perinatal cTEC	ENSMUSG00000023921	Mut	2.64209e-20	17	Unknown	74.7475	5.8526	24.0126	4.67544
Perinatal cTEC	ENSMUSG00000059714	Flot1	2.68395e-20	17	Unknown	87.8788	7.45012	38.8689	6.46611
Perinatal cTEC	ENSMUSG00000024556	Me2	2.72764e-20	18	Unknown	96.9697	8.05658	50.5386	6.46634
Perinatal cTEC	ENSMUSG00000039607	Rbms3	3.44741e-20	9	Unknown	96.9697	7.04893	58.7971	6.82865
Perinatal cTEC	ENSMUSG00000040562	Gstm2	4.22791e-20	3	Unknown	76.7677	7.99051	34.3357	7.80504
Perinatal cTEC	ENSMUSG00000045934	Mtmr11	4.29325e-20	3	Unknown	53.5354	5.44045	15.0808	4.0815
Perinatal cTEC	ENSMUSG00000020780	Srp68	5.60989e-20	11	Unknown	95.9596	7.75897	44.4794	6.04796
Perinatal cTEC	ENSMUSG00000031451	Gas6	5.76303e-20	8	Unknown	100	10.3874	80.3411	9.22857
Perinatal cTEC	ENSMUSG00000024639	Gnaq	5.9702e-20	19	Unknown	96.9697	7.45217	53.6355	6.5267
Perinatal cTEC	ENSMUSG00000000325	Arvcf	6.84306e-20	16	Unknown	56.5657	5.29505	14.1831	4.13531
Perinatal cTEC	ENSMUSG00000058325	Dock1	7.68828e-20	7	Unknown	89.899	6.82076	39.5422	5.81201
Perinatal cTEC	ENSMUSG00000022636	Alcam	8.90158e-20	16	Unknown	100	8.52492	62.9713	7.09138
Perinatal cTEC	ENSMUSG00000016495	Plgrkt	9.27777e-20	19	Unknown	100	10.0583	67.2801	7.84247
Perinatal cTEC	ENSMUSG00000036093	Arl5a	1.04696e-19	2	Unknown	74.7475	5.3436	24.9102	4.56354
Perinatal cTEC	ENSMUSG00000024381	Bin1	1.28947e-19	18	Unknown	97.9798	7.38235	43.6266	6.24739
Perinatal cTEC	ENSMUSG00000023044	Csad	1.50291e-19	15	Unknown	87.8788	6.82843	38.4201	6.39636
Perinatal cTEC	ENSMUSG00000026249	Serpine2	1.58239e-19	1	Unknown	66.6667	7.37849	21.2747	7.38938
Perinatal cTEC	ENSMUSG00000038668	Lpar1	1.65555e-19	4	Cell_Surface	98.9899	7.70388	44.0754	6.80605
Perinatal cTEC	ENSMUSG00000020160	Meis1	1.76618e-19	11	Unknown	90.9091	7.07549	46.0054	6.15809
Perinatal cTEC	ENSMUSG00000022676	Snai2	1.92969e-19	16	Unknown	86.8687	7.74748	35.9515	7.10283
Perinatal cTEC	ENSMUSG00000025894	Aasdhppt	1.93895e-19	9	Unknown	88.8889	6.34064	32.7199	5.12729
Perinatal cTEC	ENSMUSG00000028228	Cpne3	2.23143e-19	4	Unknown	94.9495	7.16169	51.2567	6.6463
Perinatal cTEC	ENSMUSG00000004936	Map2k1	2.38424e-19	9	Unknown	97.9798	8.41879	53.4111	6.59369
Perinatal cTEC	ENSMUSG00000028445	Enho	2.38703e-19	4	Unknown	83.8384	7.69337	32.8546	6.66582
Perinatal cTEC	ENSMUSG00000029291	Rufy3	2.905e-19	5	Unknown	80.8081	6.17705	29.982	4.95218
Perinatal cTEC	ENSMUSG00000009418	Nav1	3.13677e-19	1	Unknown	58.5859	5.7405	16.6517	4.5675
Perinatal cTEC	ENSMUSG00000022244	Amacr	3.4005e-19	15	Unknown	63.6364	6.12164	19.2101	5.16994
Perinatal cTEC	ENSMUSG00000022742	Cpox	3.89621e-19	16	Unknown	78.7879	6.40445	33.0341	5.40016
Perinatal cTEC	ENSMUSG00000021482	Aaed1	4.13923e-19	13	Unknown	78.7879	5.71873	28.6804	5.01618
Perinatal cTEC	ENSMUSG00000042558	Adprhl2	4.13923e-19	4	Unknown	97.9798	7.87622	42.4596	6.73399
Perinatal cTEC	ENSMUSG00000041845	Rhod	4.97575e-19	19	Unknown	51.5152	6.5152	15.8438	5.17298
Perinatal cTEC	ENSMUSG00000022836	Mylk	4.99206e-19	16	Unknown	67.6768	5.7422	19.2549	4.78166
Perinatal cTEC	ENSMUSG00000011831	Evi5	6.36884e-19	5	Unknown	74.7475	6.15598	28.6804	5.1291
Perinatal cTEC	ENSMUSG00000024426	Atat1	7.4484e-19	17	Unknown	74.7475	6.42066	29.3986	5.43526
Perinatal cTEC	ENSMUSG00000021820	Camk2g	7.8796e-19	14	Unknown	71.7172	6.06031	24.4614	4.92794
Perinatal cTEC	ENSMUSG00000025153	Fasn	8.00223e-19	11	Unknown	72.7273	6.35405	22.0377	5.58305
Perinatal cTEC	ENSMUSG00000027984	Hadh	8.31477e-19	3	Unknown	100	8.81306	63.061	7.36534
Perinatal cTEC	ENSMUSG00000025372	Baiap2	8.48292e-19	11	Unknown	76.7677	6.62371	31.4632	5.56153
Perinatal cTEC	ENSMUSG00000031644	Nek1	8.48292e-19	8	Unknown	69.697	6.13196	24.9551	5.15483
Perinatal cTEC	ENSMUSG00000025260	Hsd17b10	8.60251e-19	X	Unknown	96.9697	8.36201	48.5637	7.02612
Perinatal cTEC	ENSMUSG00000062202	Btbd9	8.7851e-19	17	Unknown	76.7677	6.00481	26.9749	5.45793
Perinatal cTEC	ENSMUSG00000020096	Tbata	9.74581e-19	10	Unknown	85.8586	12.755	48.6984	10.4985
Perinatal cTEC	ENSMUSG00000001755	Coasy	1.10244e-18	11	Unknown	82.8283	7.10833	30.0718	5.81608
Perinatal cTEC	ENSMUSG00000037833	Sh2d4b	1.13909e-18	14	Unknown	85.8586	7.98402	36.4452	6.16549
Perinatal cTEC	ENSMUSG00000019822	Smpd2	1.21673e-18	10	Unknown	70.7071	6.90597	24.8654	6.02789
Perinatal cTEC	ENSMUSG00000022178	Ajuba	1.22348e-18	14	Unknown	76.7677	6.47895	24.7756	5.41899
Perinatal cTEC	ENSMUSG00000036615	Rfxap	1.31985e-18	3	Unknown	77.7778	6.63094	26.7056	5.14631
Perinatal cTEC	ENSMUSG00000029403	Cdkl2	1.44432e-18	5	Unknown	70.7071	5.5622	25.1346	4.66032
Perinatal cTEC	ENSMUSG00000029103	Lrpap1	1.55363e-18	5	Cell_Surface	100	9.50257	62.9264	8.23664
Perinatal cTEC	ENSMUSG00000032459	Mrps22	1.67752e-18	9	Unknown	68.6869	6.25016	20.6014	4.82491
Perinatal cTEC	ENSMUSG00000018217	Pmp22	1.68974e-18	11	Unknown	63.6364	6.21927	21.8133	6.52384
Perinatal cTEC	ENSMUSG00000028576	Ift74	1.72165e-18	4	Unknown	73.7374	5.9532	26.3914	4.67433
Perinatal cTEC	ENSMUSG00000024940	Ltbp3	2.40031e-18	19	Unknown	74.7475	6.48828	30.2513	6.12757
Perinatal cTEC	ENSMUSG00000018899	Irf1	2.57575e-18	11	Transcription_Factor	100	10.5425	68.0431	8.6206
Perinatal cTEC	ENSMUSG00000060935	AI597468	2.57882e-18	10	Unknown	93.9394	6.7375	39.4075	5.65727
Perinatal cTEC	ENSMUSG00000022257	Laptm4b	2.58119e-18	15	Unknown	92.9293	7.34676	43.088	6.70343
Perinatal cTEC	ENSMUSG00000028672	Hmgcl	2.62599e-18	4	Unknown	76.7677	6.97608	32.2711	6.0851
Perinatal cTEC	ENSMUSG00000022571	Pycrl	2.65298e-18	15	Unknown	80.8081	7.57989	31.8223	6.30676
Perinatal cTEC	ENSMUSG00000009894	Snap47	2.67993e-18	11	Unknown	93.9394	8.01957	48.0251	6.87236
Perinatal cTEC	ENSMUSG00000029923	Rab19	2.67993e-18	6	Unknown	71.7172	7.13857	27.7379	6.08681
Perinatal cTEC	ENSMUSG00000054676	1600014C10Rik	2.67993e-18	7	Unknown	92.9293	7.34809	39.4973	6.18714
Perinatal cTEC	ENSMUSG00000036256	Igfbp7	2.81499e-18	5	Unknown	51.5152	6.96381	15.395	7.03112
Perinatal cTEC	ENSMUSG00000028093	Acp6	2.87847e-18	3	Unknown	66.6667	6.38311	22.1724	5.52946
Perinatal cTEC	ENSMUSG00000030056	Isy1	2.9625e-18	6	Unknown	86.8687	6.09429	35.0987	5.00124
Perinatal cTEC	ENSMUSG00000044792	Isca1	3.04333e-18	13	Unknown	86.8687	6.72502	38.5099	5.70569
Perinatal cTEC	ENSMUSG00000078954	Arhgap8	3.39826e-18	15	Unknown	97.9798	8.35553	53.6355	6.72922
Perinatal cTEC	ENSMUSG00000069808	Fam57a	3.58881e-18	11	Unknown	65.6566	6.34591	23.5189	5.21716
Perinatal cTEC	ENSMUSG00000022475	Hdac7	3.58881e-18	15	Unknown	69.697	5.05582	17.8636	4.2825
Perinatal cTEC	ENSMUSG00000052632	Asap2	3.68544e-18	12	Unknown	77.7778	5.69109	29.8923	4.39928
Perinatal cTEC	ENSMUSG00000021930	Spryd7	5.27214e-18	14	Unknown	98.9899	8.35147	61.8941	6.93744
Perinatal cTEC	ENSMUSG00000025429	Pstpip2	5.36258e-18	18	Unknown	70.7071	5.80673	22.6661	4.25497
Perinatal cTEC	ENSMUSG00000027163	Commd9	6.32215e-18	2	Unknown	91.9192	8.08324	41.7415	6.69003
Perinatal cTEC	ENSMUSG00000095677	Dynlt1f	6.96359e-18	17	Unknown	94.9495	6.4336	46.2298	5.0588
Perinatal cTEC	ENSMUSG00000048078	Tenm4	7.63099e-18	7	Unknown	80.8081	6.0867	25.8977	5.39816
Perinatal cTEC	ENSMUSG00000030067	Foxp1	9.03627e-18	6	Transcription_Factor	94.9495	6.53405	54.3537	6.20612
Perinatal cTEC	ENSMUSG00000025555	Farp1	9.28481e-18	14	Unknown	62.6263	5.69271	19.2998	4.48818
Perinatal cTEC	ENSMUSG00000057440	Mpp7	9.76053e-18	18	Unknown	70.7071	6.70146	29.3088	5.44387
Perinatal cTEC	ENSMUSG00000026411	Tmem9	1.04972e-17	1	Unknown	89.899	7.69508	41.158	6.91962
Perinatal cTEC	ENSMUSG00000022464	Slc38a4	1.09048e-17	15	Unknown	56.5657	5.63055	12.6571	4.80075
Perinatal cTEC	ENSMUSG00000003559	As3mt	1.10754e-17	19	Unknown	72.7273	6.87483	27.4237	6.03854
Perinatal cTEC	ENSMUSG00000022837	Iqcb1	1.14294e-17	16	Unknown	71.7172	5.4909	24.8654	4.34507
Perinatal cTEC	ENSMUSG00000039246	Lyplal1	1.24575e-17	1	Unknown	54.5455	5.73469	14.5422	4.38402
Perinatal cTEC	ENSMUSG00000036880	Acaa2	1.28157e-17	18	Unknown	86.8687	8.42128	42.8187	7.66678
Perinatal cTEC	ENSMUSG00000039481	Nrtn	1.28953e-17	17	Unknown	84.8485	7.66119	36.6697	7.17514
Perinatal cTEC	ENSMUSG00000024026	Glo1	1.4722e-17	17	Unknown	96.9697	7.31546	48.6535	6.50747
Perinatal cTEC	ENSMUSG00000062866	Phactr2	1.4722e-17	10	Unknown	78.7879	6.75333	38.7792	6.15465
Perinatal cTEC	ENSMUSG00000002808	Epdr1	1.49542e-17	13	Unknown	59.596	5.77201	16.2029	5.4754
Perinatal cTEC	ENSMUSG00000020315	Sptbn1	1.53705e-17	11	Unknown	98.9899	8.08152	68.3573	7.50252
Perinatal cTEC	ENSMUSG00000026687	Aldh9a1	1.61605e-17	1	Unknown	82.8283	7.22787	35.2783	5.86021
Perinatal cTEC	ENSMUSG00000028086	Fbxw7	1.67472e-17	3	Transcription_Factor	89.899	6.11482	35.0987	5.65476
Perinatal cTEC	ENSMUSG00000001497	Pax9	1.67835e-17	12	Transcription_Factor	94.9495	7.8517	56.553	6.77265
Perinatal cTEC	ENSMUSG00000069089	Cdk7	1.69983e-17	13	Unknown	92.9293	7.43454	44.8833	6.28669
Perinatal cTEC	ENSMUSG00000034761	Map4k5	1.69983e-17	12	Unknown	66.6667	4.94112	21.14	4.37596
Perinatal cTEC	ENSMUSG00000022420	Dnal4	1.77028e-17	15	Unknown	83.8384	7.00998	31.149	5.9701
Perinatal cTEC	ENSMUSG00000021294	Kif26a	1.89727e-17	12	Unknown	69.697	6.45862	29.623	4.95512
Perinatal cTEC	ENSMUSG00000030060	Hmces	1.98537e-17	6	Unknown	75.7576	6.83692	23.3842	5.74138
Perinatal cTEC	ENSMUSG00000001089	Luzp1	2.01859e-17	4	Unknown	96.9697	7.89706	56.2388	7.28119
Perinatal cTEC	ENSMUSG00000028218	Fam92a	2.06287e-17	4	Unknown	92.9293	7.06385	40.5296	6.01682
Perinatal cTEC	ENSMUSG00000037235	Mxd4	2.11793e-17	5	Unknown	100	8.39191	61.7145	7.46175
Perinatal cTEC	ENSMUSG00000053113	Socs3	2.38803e-17	11	Unknown	81.8182	8.18938	37.1185	6.92154
Perinatal cTEC	ENSMUSG00000029469	Ift81	2.4194e-17	5	Unknown	57.5758	5.45365	17.5045	4.60796
Perinatal cTEC	ENSMUSG00000028229	Rmdn1	2.54779e-17	4	Unknown	84.8485	6.71661	36.2208	5.79871
Perinatal cTEC	ENSMUSG00000031176	Dynlt3	2.60318e-17	X	Unknown	95.9596	7.73904	57.675	6.71788
Perinatal cTEC	ENSMUSG00000044876	Zfp444	2.75196e-17	7	Transcription_Factor	82.8283	7.16648	35.009	5.79207
Perinatal cTEC	ENSMUSG00000032788	Pdxk	2.76454e-17	10	Unknown	63.6364	6.03847	22.4865	5.27581
Perinatal cTEC	ENSMUSG00000028532	Cachd1	2.85249e-17	4	Unknown	88.8889	6.40429	42.2801	5.5129
Perinatal cTEC	ENSMUSG00000016496	Cd274	3.00809e-17	19	Cell_Surface	90.9091	7.92493	50.4937	6.63124
Perinatal cTEC	ENSMUSG00000078234	Klhdc7a	3.02437e-17	4	Unknown	57.5758	5.11785	18.7163	4.36186
Perinatal cTEC	ENSMUSG00000032615	Nt5m	3.16195e-17	11	Unknown	60.6061	6.32671	21.1849	4.9979
Perinatal cTEC	ENSMUSG00000021318	Gli3	3.19345e-17	13	Transcription_Factor	74.7475	5.71949	26.8402	4.81119
Perinatal cTEC	ENSMUSG00000078570	1110065P20Rik	3.27493e-17	4	Unknown	88.8889	5.91013	37.7469	4.64859
Perinatal cTEC	ENSMUSG00000057531	Dtnbp1	3.29106e-17	13	Unknown	83.8384	7.38559	39.4973	6.16829
Perinatal cTEC	ENSMUSG00000020629	Adi1	3.47825e-17	12	Unknown	95.9596	7.68044	47.7558	6.5426
Perinatal cTEC	ENSMUSG00000038387	Rras	3.78467e-17	7	Unknown	96.9697	7.75475	55.2962	7.13863
Perinatal cTEC	ENSMUSG00000042035	Igsf3	4.02697e-17	3	Cell_Surface	98.9899	8.4232	61.8492	7.92934
Perinatal cTEC	ENSMUSG00000037111	Setd7	4.20798e-17	3	Unknown	80.8081	5.1265	29.5781	5.26128
Perinatal cTEC	ENSMUSG00000022816	Fstl1	4.56914e-17	16	Unknown	92.9293	8.28019	49.8654	7.42367
Perinatal cTEC	ENSMUSG00000018012	Rac3	4.6769e-17	11	Unknown	82.8283	6.71451	38.6894	6.05326
Perinatal cTEC	ENSMUSG00000029007	Agtrap	5.31125e-17	4	Unknown	76.7677	6.68228	33.3034	5.70888
Perinatal cTEC	ENSMUSG00000058351	Smim4	5.84941e-17	14	Unknown	85.8586	5.85992	34.2908	4.89885
Perinatal cTEC	ENSMUSG00000036452	Arhgap26	6.09463e-17	18	Unknown	89.899	6.08237	32.3609	5.02729
Perinatal cTEC	ENSMUSG00000020806	Rhbdf2	7.09323e-17	11	Unknown	62.6263	6.20298	20.9605	5.11427
Perinatal cTEC	ENSMUSG00000039883	Lrrc17	8.9861e-17	5	Unknown	64.6465	6.4973	16.8312	5.3717
Perinatal cTEC	ENSMUSG00000086316	2210013O21Rik	9.17504e-17	X	Unknown	94.9495	7.39775	47.4417	6.56538
Perinatal cTEC	ENSMUSG00000042709	Atpaf2	9.36008e-17	11	Unknown	83.8384	7.12637	32.5404	6.19325
Perinatal cTEC	ENSMUSG00000025607	Copg2	9.83876e-17	6	Unknown	72.7273	6.45574	27.8276	5.08738
Perinatal cTEC	ENSMUSG00000002017	Fam98a	1.06205e-16	17	Unknown	87.8788	6.62896	39.1831	5.28426
Perinatal cTEC	ENSMUSG00000002365	Snx9	1.07764e-16	17	Unknown	89.899	7.07451	45.6912	5.80232
Perinatal cTEC	ENSMUSG00000032018	Sc5d	1.20711e-16	9	Unknown	92.9293	7.84261	48.1149	6.74895
Perinatal cTEC	ENSMUSG00000060260	Pwwp2b	1.52688e-16	7	Unknown	55.5556	5.26719	17.8636	4.35013
Perinatal cTEC	ENSMUSG00000044148	1810030O07Rik	1.54689e-16	X	Unknown	80.8081	6.66921	36.1759	6.01698
Perinatal cTEC	ENSMUSG00000032606	Nicn1	1.82207e-16	9	Unknown	78.7879	6.7369	30.1167	6.05234
Perinatal cTEC	ENSMUSG00000073987	Ggh	1.86339e-16	4	Unknown	88.8889	7.41063	41.6966	6.70024
Perinatal cTEC	ENSMUSG00000028245	Nsmaf	2.08373e-16	4	Unknown	79.798	6.80734	36.1759	5.37789
Perinatal cTEC	ENSMUSG00000026478	Lamc1	2.09864e-16	1	Unknown	59.596	5.76293	18.088	4.36289
Perinatal cTEC	ENSMUSG00000059248	Sept9	2.15011e-16	11	Unknown	93.9394	6.78343	49.6858	5.76227
Perinatal cTEC	ENSMUSG00000034412	Tbc1d10a	2.34719e-16	11	Unknown	93.9394	8.13308	50.763	7.05397
Perinatal cTEC	ENSMUSG00000020376	Rnf130	2.45342e-16	11	Unknown	73.7374	6.38331	35.009	5.87382
Perinatal cTEC	ENSMUSG00000015750	Aph1a	2.51581e-16	3	Unknown	96.9697	6.1525	51.4811	5.08719
Perinatal cTEC	ENSMUSG00000039715	Wdr34	2.51637e-16	2	Unknown	69.697	6.44443	22.711	5.28714
Perinatal cTEC	ENSMUSG00000038658	C030046E11Rik	2.52045e-16	19	Unknown	96.9697	6.38236	54.623	5.51802
Perinatal cTEC	ENSMUSG00000008167	Fbxw9	2.60641e-16	8	Unknown	63.6364	6.31609	22.3519	5.32924
Perinatal cTEC	ENSMUSG00000015994	Fnta	2.90979e-16	8	Unknown	96.9697	8.14857	52.7379	7.38172
Perinatal cTEC	ENSMUSG00000002319	Ipo4	2.99957e-16	14	Unknown	78.7879	6.62692	28.456	5.38695
Perinatal cTEC	ENSMUSG00000029207	Apbb2	3.01055e-16	5	Unknown	66.6667	5.88966	22.7558	4.65197
Perinatal cTEC	ENSMUSG00000048490	Nrip1	3.18998e-16	16	Unknown	82.8283	6.63273	41.2926	5.96696
Perinatal cTEC	ENSMUSG00000051007	Pddc1	3.19572e-16	7	Unknown	82.8283	6.61229	36.4901	5.70613
Perinatal cTEC	ENSMUSG00000021127	Zfp36l1	3.43417e-16	12	Unknown	100	7.96416	69.2998	7.82489
Perinatal cTEC	ENSMUSG00000059824	Dbp	4.27878e-16	7	Transcription_Factor	73.7374	5.89231	31.4183	5.68108
Perinatal cTEC	ENSMUSG00000032009	Sesn3	4.34898e-16	9	Unknown	90.9091	6.64108	52.6481	6.36083
Perinatal cTEC	ENSMUSG00000022515	Anks3	4.35918e-16	16	Unknown	70.7071	6.32878	27.3339	5.3098
Perinatal cTEC	ENSMUSG00000020484	Xbp1	4.43576e-16	11	Transcription_Factor	98.9899	8.63317	62.3878	7.58851
Perinatal cTEC	ENSMUSG00000035392	Dennd1a	4.49129e-16	2	Unknown	64.6465	5.01553	19.9282	4.47597
Perinatal cTEC	ENSMUSG00000031575	Ash2l	4.50905e-16	8	Unknown	87.8788	7.4083	40.0808	6.32652
Perinatal cTEC	ENSMUSG00000057329	Bcl2	4.55768e-16	1	Unknown	87.8788	7.01834	45.0628	6.77677
Perinatal cTEC	ENSMUSG00000032013	Trim29	4.95361e-16	9	Unknown	95.9596	8.62986	58.079	7.77484
Perinatal cTEC	ENSMUSG00000015126	Tsr3	4.97293e-16	17	Unknown	84.8485	7.16141	33.9318	6.1052
Perinatal cTEC	ENSMUSG00000051502	Ufsp1	5.30134e-16	5	Unknown	83.8384	6.82345	30.4758	5.77493
Perinatal cTEC	ENSMUSG00000026483	Fam129a	5.98525e-16	1	Unknown	78.7879	6.51701	37.0287	5.98935
Perinatal cTEC	ENSMUSG00000040997	Abhd4	6.59748e-16	14	Unknown	78.7879	6.75191	33.7971	6.03157
Perinatal cTEC	ENSMUSG00000041598	Cdc42ep4	7.1342e-16	11	Unknown	60.6061	6.91148	24.5512	5.24282
Perinatal cTEC	ENSMUSG00000023249	Parp3	7.57761e-16	9	Unknown	78.7879	7.05187	35.9066	5.66432
Perinatal cTEC	ENSMUSG00000042258	Isl1	7.7247e-16	13	Unknown	92.9293	8.06732	57.6302	7.70167
Perinatal cTEC	ENSMUSG00000027805	Pfn2	7.89919e-16	3	Unknown	93.9394	7.61145	47.2172	6.71543
Perinatal cTEC	ENSMUSG00000021375	Kif13a	8.01946e-16	13	Unknown	68.6869	5.62231	26.93	5.10007
Perinatal cTEC	ENSMUSG00000019917	Sept10	8.07092e-16	10	Unknown	94.9495	6.03727	53.1418	5.33847
Perinatal cTEC	ENSMUSG00000023348	Trip6	8.12228e-16	5	Unknown	79.798	7.24882	34.8294	6.45361
Perinatal cTEC	ENSMUSG00000046879	Irgm1	8.12462e-16	11	Unknown	94.9495	8.93929	53.2316	8.05989
Perinatal cTEC	ENSMUSG00000026171	Rnf25	8.50402e-16	1	Unknown	66.6667	6.78215	25	5.5394
Perinatal cTEC	ENSMUSG00000051483	Cbr1	8.68958e-16	16	Unknown	91.9192	7.84151	50.0449	7.2257
Perinatal cTEC	ENSMUSG00000044442	N6amt1	9.06678e-16	16	Unknown	81.8182	6.73541	32.675	5.91628
Perinatal cTEC	ENSMUSG00000018672	Copz2	9.27079e-16	11	Unknown	97.9798	8.59981	60.368	8.29614
Perinatal cTEC	ENSMUSG00000028037	Ifi44	9.35726e-16	3	Unknown	89.899	7.08367	44.0305	6.98956
Perinatal cTEC	ENSMUSG00000029178	Klf3	9.41695e-16	5	Unknown	88.8889	6.98136	45.8707	6.65074
Perinatal cTEC	ENSMUSG00000021222	Dcaf4	9.59563e-16	12	Unknown	57.5758	6.30415	21.3196	5.07738
Perinatal cTEC	ENSMUSG00000020538	Srebf1	1.00016e-15	11	Transcription_Factor	84.8485	7.55416	43.2226	6.07747
Perinatal cTEC	ENSMUSG00000067787	Blcap	1.00476e-15	2	Unknown	86.8687	6.91049	40.4847	5.76525
Perinatal cTEC	ENSMUSG00000072964	Bhlhb9	1.03009e-15	X	Unknown	71.7172	6.34913	24.5063	4.85016
Perinatal cTEC	ENSMUSG00000024588	Fech	1.13239e-15	18	Unknown	74.7475	6.28639	32.4057	5.28689
Perinatal cTEC	ENSMUSG00000030872	Gga2	1.22308e-15	7	Unknown	75.7576	6.56867	31.4632	5.42462
Perinatal cTEC	ENSMUSG00000032599	Ip6k2	1.45263e-15	9	Unknown	90.9091	7.00144	44.9282	5.83811
Perinatal cTEC	ENSMUSG00000041959	S100a10	1.55201e-15	3	Unknown	100	9.68909	73.5637	8.71722
Perinatal cTEC	ENSMUSG00000028345	Tex10	1.60309e-15	4	Unknown	83.8384	5.99965	38.5996	4.75717
Perinatal cTEC	ENSMUSG00000025035	Arl3	1.77327e-15	19	Unknown	98.9899	7.41696	59.7397	6.49208
Perinatal cTEC	ENSMUSG00000044712	Slc38a6	1.78572e-15	12	Unknown	71.7172	4.9126	27.693	4.23668
Perinatal cTEC	ENSMUSG00000032536	Trak1	1.80802e-15	9	Unknown	83.8384	5.70903	32.2262	5.19057
Perinatal cTEC	ENSMUSG00000039515	Ppp2r4	1.8647e-15	2	Unknown	95.9596	7.41094	56.3285	6.18138
Perinatal cTEC	ENSMUSG00000043987	Cep164	1.9204e-15	9	Unknown	88.8889	5.98941	42.9533	5.39601
Perinatal cTEC	ENSMUSG00000021033	Gstz1	1.92691e-15	12	Unknown	79.798	7.00491	32.4955	5.91873
Perinatal cTEC	ENSMUSG00000097290	1300002E11Rik	1.93079e-15	16	Unknown	88.8889	7.24634	41.8761	6.00054
Perinatal cTEC	ENSMUSG00000009569	Mkl2	2.50462e-15	16	Unknown	90.9091	7.37771	47.711	6.53803
Perinatal cTEC	ENSMUSG00000030275	Etnk1	2.7796e-15	6	Unknown	90.9091	6.70575	48.1149	6.10238
Perinatal cTEC	ENSMUSG00000021371	Mcur1	2.9832e-15	13	Unknown	71.7172	5.8274	25.3142	4.85796
Perinatal cTEC	ENSMUSG00000032047	Acat1	2.98602e-15	9	Unknown	100	8.69337	56.7325	7.56336
Perinatal cTEC	ENSMUSG00000051510	Mafg	3.05282e-15	11	Transcription_Factor	91.9192	7.80947	48.1598	6.64931
Perinatal cTEC	ENSMUSG00000036840	Siah1a	3.12722e-15	8	Unknown	76.7677	5.77545	30.3411	4.8182
Perinatal cTEC	ENSMUSG00000044786	Zfp36	3.13766e-15	7	Unknown	98.9899	9.57853	65.4399	8.0716
Perinatal cTEC	ENSMUSG00000062376	2010012O05Rik	3.24254e-15	19	Unknown	85.8586	6.30761	38.4201	5.52365
Perinatal cTEC	ENSMUSG00000026883	Dab2ip	3.38467e-15	2	Unknown	71.7172	5.60804	27.9174	5.26625
Perinatal cTEC	ENSMUSG00000090942	F830016B08Rik	3.83036e-15	18	Unknown	60.6061	6.79658	23.0251	5.39471
Perinatal cTEC	ENSMUSG00000022106	Rcbtb2	3.97735e-15	14	Unknown	95.9596	7.4286	40.1257	6.28284
Perinatal cTEC	ENSMUSG00000034850	Tmem127	4.45875e-15	2	Unknown	95.9596	7.47108	63.4201	6.83601
Perinatal cTEC	ENSMUSG00000028636	Ppcs	4.59925e-15	4	Unknown	84.8485	7.73431	37.298	6.40339
Perinatal cTEC	ENSMUSG00000042770	Hebp1	4.64307e-15	6	Unknown	97.9798	7.74912	48.9228	6.83482
Perinatal cTEC	ENSMUSG00000030231	Plekha5	4.72303e-15	6	Unknown	92.9293	7.8788	50.1795	6.49498
Perinatal cTEC	ENSMUSG00000040483	Xaf1	5.38307e-15	11	Unknown	96.9697	8.63283	59.605	8.12178
Perinatal cTEC	ENSMUSG00000030161	Gabarapl1	5.45989e-15	6	Unknown	84.8485	6.24167	47.2172	5.52477
Perinatal cTEC	ENSMUSG00000025171	Ubtd1	5.5696e-15	19	Unknown	61.6162	5.81657	20.1975	5.26005
Perinatal cTEC	ENSMUSG00000028760	Eif4g3	6.11913e-15	4	Unknown	92.9293	6.3475	48.1598	5.72609
Perinatal cTEC	ENSMUSG00000032802	Srxn1	6.12632e-15	2	Unknown	76.7677	8.23067	34.6499	6.74837
Perinatal cTEC	ENSMUSG00000024431	Nr3c1	6.17851e-15	18	Transcription_Factor	83.8384	6.85258	44.0754	6.32153
Perinatal cTEC	ENSMUSG00000029209	Gnpda2	6.45804e-15	5	Unknown	88.8889	7.16466	41.6966	6.51331
Perinatal cTEC	ENSMUSG00000029380	Cxcl1	6.48538e-15	5	Unknown	43.4343	8.11955	12.6571	6.69503
Perinatal cTEC	ENSMUSG00000040433	Zbtb38	6.78067e-15	9	Unknown	88.8889	7.17569	47.8456	6.49679
Perinatal cTEC	ENSMUSG00000014075	Tctex1d2	6.96653e-15	16	Unknown	68.6869	5.63851	24.5063	4.73685
Perinatal cTEC	ENSMUSG00000055401	Fbxo6	6.96653e-15	4	Unknown	92.9293	8.22379	50.4039	7.05992
Perinatal cTEC	ENSMUSG00000035232	Pdk3	7.11068e-15	X	Unknown	81.8182	6.82756	32.7648	5.63062
Perinatal cTEC	ENSMUSG00000044033	Ccdc141	7.24746e-15	2	Unknown	60.6061	5.37543	16.921	4.51953
Perinatal cTEC	ENSMUSG00000040813	Tex264	7.44878e-15	9	Unknown	91.9192	8.09167	54.0844	7.18454
Perinatal cTEC	ENSMUSG00000021062	Rab15	8.22414e-15	12	Unknown	93.9394	7.19299	45.1077	6.43853
Perinatal cTEC	ENSMUSG00000018417	Myo1b	8.64345e-15	1	Unknown	81.8182	6.90832	36.4004	6.21946
Perinatal cTEC	ENSMUSG00000028517	Ppap2b	9.14386e-15	4	Unknown	96.9697	8.75358	68.1777	8.76805
Perinatal cTEC	ENSMUSG00000030870	Ubfd1	9.18064e-15	7	Unknown	93.9394	7.49795	45.018	6.45092
Perinatal cTEC	ENSMUSG00000040097	Flywch1	9.67723e-15	17	Unknown	72.7273	6.38786	28.7253	5.46555
Perinatal cTEC	ENSMUSG00000003923	Tfam	9.67723e-15	10	Transcription_Factor	94.9495	7.19833	43.5817	6.22194
Perinatal cTEC	ENSMUSG00000026827	Gpd2	1.00884e-14	2	Unknown	66.6667	5.97381	25.1795	5.1723
Perinatal cTEC	ENSMUSG00000021271	Zfp839	1.03878e-14	12	Unknown	54.5455	5.55915	16.6517	4.76041
Perinatal cTEC	ENSMUSG00000049354	Dcaf7	1.08848e-14	11	Unknown	92.9293	7.30626	51.6158	6.21838
Perinatal cTEC	ENSMUSG00000038286	Bphl	1.1174e-14	13	Unknown	88.8889	7.71749	47.6212	6.8064
Perinatal cTEC	ENSMUSG00000056121	Fez2	1.15269e-14	17	Unknown	57.5758	5.81203	17.8636	4.93902
Perinatal cTEC	ENSMUSG00000027610	Gss	1.16228e-14	2	Unknown	66.6667	6.61323	23.7882	5.75247
Perinatal cTEC	ENSMUSG00000040370	Lyrm5	1.17001e-14	6	Unknown	75.7576	6.24172	30.3411	5.27768
Perinatal cTEC	ENSMUSG00000002307	Daxx	1.23621e-14	17	Unknown	70.7071	6.3866	31.0592	5.17411
Perinatal cTEC	ENSMUSG00000030611	Mrps11	1.27681e-14	7	Unknown	85.8586	6.9023	34.0664	6.00283
Perinatal cTEC	ENSMUSG00000032673	Prorsd1	1.29161e-14	11	Unknown	78.7879	5.6875	32.4955	5.29045
Perinatal cTEC	ENSMUSG00000047379	B3gnt1	1.33022e-14	19	Unknown	64.6465	6.23982	22.8456	5.24686
Perinatal cTEC	ENSMUSG00000061887	Ssbp3	1.3909e-14	4	Unknown	97.9798	7.11664	64.0036	6.62201
Perinatal cTEC	ENSMUSG00000051316	Taf7	1.43542e-14	18	Transcription_Factor	86.8687	7.20723	41.8312	5.88776
Perinatal cTEC	ENSMUSG00000001630	Stk38l	1.47745e-14	6	Unknown	73.7374	5.518	32.8097	5.29352
Perinatal cTEC	ENSMUSG00000022946	Dopey2	1.65576e-14	16	Unknown	53.5354	5.74654	20.781	4.99958
Perinatal cTEC	ENSMUSG00000014980	Tsen15	1.66623e-14	1	Unknown	74.7475	6.32951	25.763	5.65445
Perinatal cTEC	ENSMUSG00000054072	Iigp1	2.09676e-14	18	Unknown	95.9596	9.13083	62.5673	8.13894
Perinatal cTEC	ENSMUSG00000055435	Maf	2.11758e-14	8	Transcription_Factor	96.9697	5.80029	51.8851	5.25721
Perinatal cTEC	ENSMUSG00000022911	Arl13b	2.15698e-14	16	Unknown	77.7778	6.47083	33.7971	5.40854
Perinatal cTEC	ENSMUSG00000015112	Slc25a13	2.23449e-14	6	Unknown	86.8687	6.91156	38.6894	5.46909
Perinatal cTEC	ENSMUSG00000062421	Arf2	2.29365e-14	11	Unknown	70.7071	5.69987	22.7558	4.8476
Perinatal cTEC	ENSMUSG00000016918	Sulf1	2.30908e-14	1	Cell_Surface	96.9697	7.25502	49.2819	7.01358
Perinatal cTEC	ENSMUSG00000022951	Rcan1	2.36489e-14	16	Unknown	76.7677	7.14923	31.5081	5.93293
Perinatal cTEC	ENSMUSG00000017132	Cyth1	2.61355e-14	11	Unknown	85.8586	6.74596	38.1957	5.57364
Perinatal cTEC	ENSMUSG00000026003	Acadl	2.69304e-14	1	Unknown	95.9596	7.94029	57.8546	7.26252
Perinatal cTEC	ENSMUSG00000028383	Hsdl2	2.72697e-14	4	Unknown	84.8485	6.95452	45.5117	6.32502
Perinatal cTEC	ENSMUSG00000030341	Tnfrsf1a	2.75762e-14	6	Cell_Surface	94.9495	7.08797	55.2513	6.63555
Perinatal cTEC	ENSMUSG00000036977	Anapc10	2.84957e-14	8	Unknown	81.8182	6.64767	35.5027	5.57094
Perinatal cTEC	ENSMUSG00000034187	Nsf	2.85575e-14	11	Unknown	68.6869	6.02639	26.6607	5.24446
Perinatal cTEC	ENSMUSG00000020766	Galk1	3.01189e-14	11	Unknown	74.7475	7.91945	29.8474	6.15205
Perinatal cTEC	ENSMUSG00000028266	Lmo4	3.01527e-14	3	Unknown	98.9899	6.78329	64.9013	6.63855
Perinatal cTEC	ENSMUSG00000019487	Trip10	3.43867e-14	17	Unknown	68.6869	5.85798	25.6732	5.20193
Perinatal cTEC	ENSMUSG00000001100	Poldip2	3.50395e-14	11	Unknown	93.9394	7.55932	44.1203	6.39185
Perinatal cTEC	ENSMUSG00000017561	Crlf3	3.56318e-14	11	Unknown	67.6768	5.88401	23.6535	4.67019
Perinatal cTEC	ENSMUSG00000032086	Bace1	3.71344e-14	9	Cell_Surface	73.7374	6.20667	30.2962	5.70701
Perinatal cTEC	ENSMUSG00000051319	1500011K16Rik	3.99237e-14	2	Unknown	98.9899	6.44309	55.1167	5.71071
Perinatal cTEC	ENSMUSG00000022323	Hrsp12	4.0392e-14	15	Unknown	60.6061	5.98712	22.4865	5.86172
Perinatal cTEC	ENSMUSG00000039234	Sec24d	4.11965e-14	3	Unknown	80.8081	6.39227	34.3806	5.46654
Perinatal cTEC	ENSMUSG00000073155	1810058I24Rik	4.12507e-14	6	Unknown	100	9.23161	70.6912	7.51017
Perinatal cTEC	ENSMUSG00000022516	Nudt16l1	4.39787e-14	16	Unknown	95.9596	7.96266	47.4417	6.89209
Perinatal cTEC	ENSMUSG00000001211	Agpat3	4.48352e-14	10	Unknown	98.9899	8.55956	57.4955	7.35305
Perinatal cTEC	ENSMUSG00000026655	Fam107b	5.0117e-14	2	Unknown	83.8384	7.16904	38.1059	6.18613
Perinatal cTEC	ENSMUSG00000037234	Hook3	5.12207e-14	8	Unknown	87.8788	6.73198	52.8276	6.17869
Perinatal cTEC	ENSMUSG00000041995	Zbed3	5.65078e-14	13	Unknown	83.8384	6.0676	33.4381	5.27534
Perinatal cTEC	ENSMUSG00000020173	Cobl	5.96561e-14	11	Unknown	72.7273	5.77478	32.2711	5.70533
Perinatal cTEC	ENSMUSG00000039770	Ypel5	6.42609e-14	17	Unknown	95.9596	7.28107	54.9372	6.40136
Perinatal cTEC	ENSMUSG00000029672	Fam3c	6.63379e-14	6	Unknown	79.798	6.01887	37.298	5.41972
Perinatal cTEC	ENSMUSG00000027316	Gfra4	6.9877e-14	2	Unknown	67.6768	7.35402	22.5763	6.22681
Perinatal cTEC	ENSMUSG00000034781	Gna11	7.0128e-14	10	Unknown	91.9192	7.93966	51.6607	7.30683
Perinatal cTEC	ENSMUSG00000025085	Ablim1	7.09117e-14	19	Unknown	97.9798	8.06951	60.6373	7.06651
Perinatal cTEC	ENSMUSG00000016534	Lamp2	7.28361e-14	X	Unknown	100	10.4542	87.7917	8.86459
Perinatal cTEC	ENSMUSG00000020232	Hmg20b	7.28434e-14	10	Transcription_Factor	100	7.10425	64.3178	5.7343
Perinatal cTEC	ENSMUSG00000001082	Mfsd10	7.71281e-14	5	Unknown	75.7576	7.09187	30.9246	6.22089
Perinatal cTEC	ENSMUSG00000044461	Shisa2	8.43952e-14	14	Unknown	88.8889	7.80895	45.1077	7.24729
Perinatal cTEC	ENSMUSG00000024513	Mbd2	8.55304e-14	18	Unknown	72.7273	5.23686	28.7253	4.60288
Perinatal cTEC	ENSMUSG00000031916	Cog8	8.63282e-14	8	Unknown	91.9192	6.66306	46.8582	5.89249
Perinatal cTEC	ENSMUSG00000056214	Pard6g	8.93412e-14	18	Unknown	95.9596	7.87396	57.1813	7.25607
Perinatal cTEC	ENSMUSG00000019539	Rcn3	9.05154e-14	7	Unknown	78.7879	7.84687	33.7522	7.21873
Perinatal cTEC	ENSMUSG00000067071	Hes6	9.9917e-14	1	Transcription_Factor	96.9697	11.3448	55.5655	9.28023
Perinatal cTEC	ENSMUSG00000002741	Ykt6	1.01568e-13	11	Unknown	88.8889	6.41214	40.1706	5.13243
Perinatal cTEC	ENSMUSG00000002957	Ap2a2	1.09145e-13	7	Unknown	98.9899	7.06724	66.7415	6.4133
Perinatal cTEC	ENSMUSG00000039298	Cdk5rap2	1.13962e-13	4	Unknown	73.7374	6.21785	34.1562	5.46205
Perinatal cTEC	ENSMUSG00000004044	Ptrf	1.14978e-13	11	Unknown	97.9798	7.90121	64.5871	7.89011
Perinatal cTEC	ENSMUSG00000009640	Dmap1	1.20536e-13	4	Unknown	71.7172	6.92162	29.1741	5.7505
Perinatal cTEC	ENSMUSG00000028675	Pnrc2	1.23772e-13	4	Unknown	100	8.40926	67.1005	7.04338
Perinatal cTEC	ENSMUSG00000074890	Lcmt2	1.24941e-13	2	Unknown	60.6061	6.0915	20.7361	5.1228
Perinatal cTEC	ENSMUSG00000003809	Gcdh	1.25958e-13	8	Unknown	67.6768	6.57807	24.4614	5.62602
Perinatal cTEC	ENSMUSG00000003534	Ddr1	1.27831e-13	17	Unknown	92.9293	6.69769	55.1616	6.64385
Perinatal cTEC	ENSMUSG00000030852	Tacc2	1.28777e-13	7	Unknown	75.7576	5.93186	35.8169	5.59228
Perinatal cTEC	ENSMUSG00000043384	Gprasp1	1.28945e-13	X	Unknown	72.7273	5.78572	27.7379	5.31955
Perinatal cTEC	ENSMUSG00000061024	Rrs1	1.31008e-13	1	Unknown	80.8081	6.48702	34.8294	5.57879
Perinatal cTEC	ENSMUSG00000062753	AI413582	1.33282e-13	17	Unknown	95.9596	9.06959	62.6122	7.54033
Perinatal cTEC	ENSMUSG00000042487	Leo1	1.41717e-13	9	Unknown	78.7879	6.91093	34.6948	5.92674
Perinatal cTEC	ENSMUSG00000026269	Rnpepl1	1.41994e-13	1	Unknown	83.8384	7.75969	44.6589	6.50378
Perinatal cTEC	ENSMUSG00000026014	Raph1	1.6411e-13	1	Unknown	83.8384	6.09917	43.8061	5.38283
Perinatal cTEC	ENSMUSG00000032251	Irak1bp1	1.81094e-13	9	Unknown	67.6768	5.53383	25.3591	5.06348
Perinatal cTEC	ENSMUSG00000039473	Ubn1	1.88675e-13	16	Unknown	87.8788	7.4207	52.0197	6.28061
Perinatal cTEC	ENSMUSG00000069631	Strada	2.15165e-13	11	Unknown	65.6566	6.27873	29.219	5.36624
Perinatal cTEC	ENSMUSG00000030861	Acadsb	2.20305e-13	7	Unknown	72.7273	5.9642	31.7774	5.45921
Perinatal cTEC	ENSMUSG00000073423	Zfp414	2.26611e-13	17	Unknown	78.7879	6.36515	33.3932	5.35294
Perinatal cTEC	ENSMUSG00000033423	Eri3	2.29528e-13	4	Unknown	98.9899	7.69478	52.7828	6.67499
Perinatal cTEC	ENSMUSG00000063253	Scoc	2.38265e-13	8	Unknown	90.9091	5.91546	41.7864	5.34154
Perinatal cTEC	ENSMUSG00000022197	Pdzd2	2.47063e-13	15	Unknown	81.8182	6.44894	47.5763	6.23229
Perinatal cTEC	ENSMUSG00000097006	9530082P21Rik	2.54642e-13	17	Unknown	70.7071	6.21943	27.7379	5.39973
Perinatal cTEC	ENSMUSG00000030849	Fgfr2	2.55433e-13	7	Cell_Surface	88.8889	6.75547	44.0754	6.62745
Perinatal cTEC	ENSMUSG00000021947	Cryl1	2.81304e-13	14	Unknown	92.9293	7.97867	50.1795	7.62888
Perinatal cTEC	ENSMUSG00000041731	Pgm5	2.84936e-13	19	Unknown	66.6667	5.33406	24.1921	4.78624
Perinatal cTEC	ENSMUSG00000032178	Ilf3	2.9312e-13	9	Unknown	92.9293	7.84785	51.6607	6.78253
Perinatal cTEC	ENSMUSG00000001665	Gstt3	3.00859e-13	10	Unknown	86.8687	7.36175	42.1454	6.78406
Perinatal cTEC	ENSMUSG00000045257	Morn2	3.14073e-13	17	Unknown	71.7172	5.37005	24.3268	4.7
Perinatal cTEC	ENSMUSG00000075595	Zfp652	3.15438e-13	11	Unknown	76.7677	6.17212	36.5799	5.56348
Perinatal cTEC	ENSMUSG00000031591	Asah1	3.15892e-13	8	Unknown	89.899	7.03487	48.7882	6.09673
Perinatal cTEC	ENSMUSG00000037349	Nudt22	3.1834e-13	19	Unknown	86.8687	7.4198	37.8366	6.38362
Perinatal cTEC	ENSMUSG00000061576	Dpp6	3.22615e-13	5	Unknown	55.5556	5.8387	28.7253	6.5082
Perinatal cTEC	ENSMUSG00000025226	Fbxl15	3.3712e-13	19	Unknown	55.5556	6.03132	17.9533	4.85476
Perinatal cTEC	ENSMUSG00000059447	Hadhb	3.48006e-13	5	Unknown	97.9798	7.9599	67.8187	7.09626
Perinatal cTEC	ENSMUSG00000003033	Ap1m1	3.69205e-13	8	Unknown	90.9091	7.33215	39.228	6.29136
Perinatal cTEC	ENSMUSG00000025246	Tbl1x	3.78995e-13	X	Unknown	97.9798	7.80612	52.7828	6.6773
Perinatal cTEC	ENSMUSG00000046573	Lyrm4	3.93928e-13	13	Unknown	85.8586	6.71312	40.754	6.11808
Perinatal cTEC	ENSMUSG00000001552	Jup	4.16558e-13	11	Unknown	98.9899	8.06401	77.4686	7.36726
Perinatal cTEC	ENSMUSG00000028102	Pex11b	4.34738e-13	3	Unknown	77.7778	6.09462	31.1939	5.51496
Perinatal cTEC	ENSMUSG00000039989	Cbx4	4.46858e-13	11	Unknown	74.7475	5.75832	35.5925	5.00187
Perinatal cTEC	ENSMUSG00000014633	Cmc2	4.7268e-13	8	Unknown	70.7071	6.15017	27.1095	5.13295
Perinatal cTEC	ENSMUSG00000029185	Fam114a1	4.75899e-13	5	Unknown	65.6566	5.85345	24.7307	5.22917
Perinatal cTEC	ENSMUSG00000039456	Morc3	4.83698e-13	16	Unknown	69.697	6.041	30.6104	5.31152
Perinatal cTEC	ENSMUSG00000020089	Ppa1	4.96729e-13	10	Unknown	95.9596	8.99626	54.8474	7.78179
Perinatal cTEC	ENSMUSG00000037270	4932438A13Rik	5.2493e-13	3	Unknown	89.899	6.47191	50.4937	5.67065
Perinatal cTEC	ENSMUSG00000058761	Rnf169	5.36069e-13	7	Unknown	64.6465	5.25576	25.0898	4.63645
Perinatal cTEC	ENSMUSG00000022671	Mzt2	5.51916e-13	16	Unknown	79.798	6.64129	32.9892	5.8407
Perinatal cTEC	ENSMUSG00000042428	Mgat3	5.56315e-13	15	Unknown	56.5657	5.41924	21.544	5.29546
Perinatal cTEC	ENSMUSG00000028860	Sytl1	5.72119e-13	4	Unknown	71.7172	6.63873	34.605	6.3039
Perinatal cTEC	ENSMUSG00000033192	Lpcat2	6.53576e-13	8	Unknown	74.7475	6.59045	35.8618	6.38945
Perinatal cTEC	ENSMUSG00000020611	Gna13	6.59779e-13	11	Unknown	83.8384	6.71785	41.6068	5.89004
Perinatal cTEC	ENSMUSG00000028568	Btf3l4	7.65177e-13	4	Unknown	95.9596	6.05391	49.0575	5.12612
Perinatal cTEC	ENSMUSG00000023043	Krt18	8.18664e-13	15	Unknown	100	13.2858	96.0503	11.5975
Perinatal cTEC	ENSMUSG00000058886	Deaf1	8.52994e-13	7	Transcription_Factor	61.6162	5.75402	23.9228	5.01481
Perinatal cTEC	ENSMUSG00000036442	Thap11	8.60712e-13	8	Unknown	71.7172	6.35913	28.2765	5.72755
Perinatal cTEC	ENSMUSG00000039156	Stim2	8.71272e-13	5	Unknown	81.8182	6.60977	38.2855	5.81231
Perinatal cTEC	ENSMUSG00000056076	Eif3b	8.76204e-13	5	Unknown	94.9495	8.82146	59.0215	6.96058
Perinatal cTEC	ENSMUSG00000089687	Rab42	9.00968e-13	4	Unknown	75.7576	6.32729	29.0395	5.43498
Perinatal cTEC	ENSMUSG00000073684	2610002J02Rik	9.01353e-13	4	Unknown	83.8384	7.38272	39.8115	6.38519
Perinatal cTEC	ENSMUSG00000029405	G3bp2	9.2482e-13	5	Unknown	100	8.21831	66.4273	7.32463
Perinatal cTEC	ENSMUSG00000006356	Crip2	9.58561e-13	12	Unknown	100	10.3342	63.4201	9.09768
Perinatal cTEC	ENSMUSG00000091337	Eid1	9.95497e-13	2	Unknown	95.9596	6.81578	55.9695	6.12193
Perinatal cTEC	ENSMUSG00000039633	Lonrf1	1.12485e-12	8	Unknown	67.6768	5.65688	26.5709	5.26099
Perinatal cTEC	ENSMUSG00000029364	Wsb2	1.14468e-12	5	Unknown	82.8283	6.71984	37.2531	5.94005
Perinatal cTEC	ENSMUSG00000041220	Elovl6	1.1555e-12	3	Unknown	64.6465	5.72988	22.307	5.17333
Perinatal cTEC	ENSMUSG00000022428	Cby1	1.2999e-12	15	Unknown	73.7374	6.51915	29.5332	5.38041
Perinatal cTEC	ENSMUSG00000003200	Sh3gl1	1.33044e-12	17	Unknown	89.899	7.08387	43.3124	5.94665
Perinatal cTEC	ENSMUSG00000025612	Bach1	1.33044e-12	16	Transcription_Factor	86.8687	5.94028	38.7792	5.00812
Perinatal cTEC	ENSMUSG00000020462	Ccdc104	1.35289e-12	11	Unknown	86.8687	7.04721	41.6966	5.71312
Perinatal cTEC	ENSMUSG00000055148	Klf2	1.45738e-12	8	Transcription_Factor	84.8485	6.8081	31.149	6.10361
Perinatal cTEC	ENSMUSG00000061143	Maml3	1.46625e-12	3	Unknown	70.7071	5.36877	26.8402	4.98263
Perinatal cTEC	ENSMUSG00000033306	Lpp	1.49894e-12	16	Unknown	96.9697	8.09146	62.3429	7.50023
Perinatal cTEC	ENSMUSG00000054364	Rhob	1.52925e-12	12	Unknown	90.9091	6.25882	43.9856	5.67652
Perinatal cTEC	ENSMUSG00000004451	Ralb	1.55253e-12	1	Unknown	94.9495	8.16369	57.3609	6.81201
Perinatal cTEC	ENSMUSG00000039953	Clstn1	1.60918e-12	4	Cell_Surface	93.9394	7.57502	65.3501	7.49823
Perinatal cTEC	ENSMUSG00000023328	Ache	1.64991e-12	5	Cell_Surface	94.9495	8.36943	44.7487	7.1802
Perinatal cTEC	ENSMUSG00000071454	Dtnb	1.83594e-12	12	Unknown	83.8384	6.2862	40.8438	6.06754
Perinatal cTEC	ENSMUSG00000038502	Ptov1	1.92684e-12	7	Unknown	100	8.96373	63.6445	7.70101
Perinatal cTEC	ENSMUSG00000011884	Gltp	2.00551e-12	5	Unknown	93.9394	8.16929	49.1023	6.96139
Perinatal cTEC	ENSMUSG00000021285	Ppp1r13b	2.03519e-12	12	Unknown	82.8283	6.44489	35.9964	5.89521
Perinatal cTEC	ENSMUSG00000020647	Ncoa1	2.16313e-12	12	Unknown	75.7576	5.74498	37.0287	5.5792
Perinatal cTEC	ENSMUSG00000032026	Rexo2	2.16484e-12	9	Unknown	94.9495	7.87625	60.0539	6.98416
Perinatal cTEC	ENSMUSG00000009291	Pttg1ip	2.46007e-12	10	Unknown	96.9697	8.20322	61.4004	7.54119
Perinatal cTEC	ENSMUSG00000029781	Fkbp9	2.47649e-12	6	Unknown	74.7475	6.73383	32.8097	6.02986
Perinatal cTEC	ENSMUSG00000006589	Aprt	2.50537e-12	8	Unknown	83.8384	7.51918	42.9533	6.87854
Perinatal cTEC	ENSMUSG00000033157	Abhd10	2.63493e-12	16	Unknown	67.6768	5.87065	26.4811	5.12472
Perinatal cTEC	ENSMUSG00000042046	Dstyk	2.65533e-12	1	Unknown	59.596	5.90364	26.93	5.59695
Perinatal cTEC	ENSMUSG00000029397	Rchy1	2.72202e-12	5	Unknown	95.9596	8.27565	62.702	7.5925
Perinatal cTEC	ENSMUSG00000032030	Cul5	2.75397e-12	9	Unknown	91.9192	6.68016	50.2693	5.92353
Perinatal cTEC	ENSMUSG00000107283	NA	2.7576e-12	NA	Unknown	92.9293	7.2062	48.474	6.84135
Perinatal cTEC	ENSMUSG00000024601	Isoc1	2.77135e-12	18	Unknown	83.8384	7.09137	40.1257	6.89202
Perinatal cTEC	ENSMUSG00000004105	Angptl2	2.87495e-12	2	Unknown	69.697	7.13743	26.6607	6.26433
Perinatal cTEC	ENSMUSG00000009035	Tmem184b	2.88868e-12	15	Unknown	77.7778	6.66493	38.0162	5.35029
Perinatal cTEC	ENSMUSG00000029705	Cux1	2.97795e-12	5	Unknown	97.9798	7.01231	64.3178	6.51031
Perinatal cTEC	ENSMUSG00000044408	Sptssa	2.98812e-12	12	Unknown	96.9697	6.98361	56.6427	6.94141
Perinatal cTEC	ENSMUSG00000038305	Spats2l	2.99745e-12	1	Unknown	89.899	6.7511	46.4542	6.4129
Perinatal cTEC	ENSMUSG00000059689	Zfp637	3.02885e-12	6	Unknown	86.8687	7.40036	41.8312	6.88667
Perinatal cTEC	ENSMUSG00000034484	Snx2	3.08774e-12	18	Unknown	92.9293	7.48105	54.3986	6.74092
Perinatal cTEC	ENSMUSG00000064215	Ifi27	3.39881e-12	12	Unknown	100	9.41434	72.6212	8.89997
Perinatal cTEC	ENSMUSG00000018932	Map2k3	3.44808e-12	11	Unknown	90.9091	7.45671	48.5637	6.83519
Perinatal cTEC	ENSMUSG00000055044	Pdlim1	3.74125e-12	19	Unknown	100	10.4351	70.5566	8.67294
Perinatal cTEC	ENSMUSG00000017692	Rhbdl3	3.87534e-12	11	Unknown	87.8788	6.13995	41.4722	5.47063
Perinatal cTEC	ENSMUSG00000032422	Snx14	3.94435e-12	9	Unknown	70.7071	5.33131	30.3411	5.04135
Perinatal cTEC	ENSMUSG00000014554	Dguok	4.10813e-12	6	Unknown	80.8081	7.12984	42.8636	6.49836
Perinatal cTEC	ENSMUSG00000031563	Wwc2	4.10813e-12	8	Unknown	60.6061	5.19891	23.8779	5.15568
Perinatal cTEC	ENSMUSG00000023972	Ptk7	4.29597e-12	17	Unknown	66.6667	5.84676	29.8923	5.49428
Perinatal cTEC	ENSMUSG00000026603	Smyd2	5.45024e-12	1	Unknown	79.798	6.5788	29.5332	5.96257
Perinatal cTEC	ENSMUSG00000028035	Dnajb4	5.78792e-12	3	Unknown	70.7071	5.31584	30.6553	5.12732
Perinatal cTEC	ENSMUSG00000022241	Tars	5.87724e-12	15	Unknown	90.9091	6.69724	41.0682	5.72234
Perinatal cTEC	ENSMUSG00000003531	Dgcr6	5.97552e-12	16	Unknown	91.9192	6.99966	45.9156	6.44024
Perinatal cTEC	ENSMUSG00000000538	Tom1l2	6.30351e-12	11	Unknown	72.7273	5.96777	34.4704	5.71779
Perinatal cTEC	ENSMUSG00000004931	Apba3	6.62629e-12	10	Unknown	64.6465	6.14515	26.4811	5.68901
Perinatal cTEC	ENSMUSG00000073755	5730409E04Rik	6.66681e-12	4	Unknown	71.7172	5.97942	31.5978	5.43248
Perinatal cTEC	ENSMUSG00000026277	Stk25	6.73633e-12	1	Unknown	95.9596	7.76084	47.0826	6.80042
Perinatal cTEC	ENSMUSG00000015839	Nfe2l2	6.90709e-12	2	Transcription_Factor	95.9596	7.61779	66.6517	7.42483
Perinatal cTEC	ENSMUSG00000011096	Akt1s1	7.1409e-12	7	Unknown	89.899	6.65598	42.0108	5.59351
Perinatal cTEC	ENSMUSG00000038178	Slc43a2	7.33777e-12	11	Unknown	65.6566	5.73045	28.86	5.76365
Perinatal cTEC	ENSMUSG00000027035	Cers6	7.5009e-12	2	Unknown	77.7778	5.54381	31.7774	5.51965
Perinatal cTEC	ENSMUSG00000052926	Rnaseh2a	7.5009e-12	8	Unknown	85.8586	7.30011	39.5871	6.3961
Perinatal cTEC	ENSMUSG00000031298	Gpr64	7.61575e-12	X	Cell_Surface	60.6061	5.82752	29.0395	5.6872
Perinatal cTEC	ENSMUSG00000041961	Znrf3	8.13636e-12	11	Unknown	62.6263	6.04986	25.3591	5.39049
Perinatal cTEC	ENSMUSG00000039745	Htatip2	8.50081e-12	7	Unknown	54.5455	6.01826	21.3196	5.35274
Perinatal cTEC	ENSMUSG00000035356	Nfkbiz	8.73221e-12	16	Unknown	79.798	7.15016	39.3178	6.40693
Perinatal cTEC	ENSMUSG00000030770	Parva	9.27866e-12	7	Unknown	84.8485	7.1795	47.1275	6.60856
Perinatal cTEC	ENSMUSG00000034640	Tiparp	9.29608e-12	3	Unknown	66.6667	5.72243	25.3591	5.23849
Perinatal cTEC	ENSMUSG00000021379	Id4	9.70851e-12	13	Unknown	75.7576	5.45507	34.2011	5.67122
Perinatal cTEC	ENSMUSG00000015002	Efr3a	1.00838e-11	15	Unknown	82.8283	6.48077	37.5224	5.58382
Perinatal cTEC	ENSMUSG00000039159	Ube2h	1.08695e-11	6	Unknown	92.9293	6.6863	48.1149	6.09673
Perinatal cTEC	ENSMUSG00000029249	Rest	1.08805e-11	5	Transcription_Factor	85.8586	6.7313	37.5224	6.00138
Perinatal cTEC	ENSMUSG00000030763	Lcmt1	1.08904e-11	7	Unknown	73.7374	6.8814	32.8995	5.95469
Perinatal cTEC	ENSMUSG00000006127	Inpp5k	1.11225e-11	11	Unknown	74.7475	6.49103	30.5655	5.75835
Perinatal cTEC	ENSMUSG00000038416	Cdc16	1.15005e-11	8	Unknown	90.9091	7.26697	46.544	6.37128
Perinatal cTEC	ENSMUSG00000046032	Snx12	1.15653e-11	X	Unknown	83.8384	6.6357	38.2855	5.79306
Perinatal cTEC	ENSMUSG00000028657	Ppt1	1.16007e-11	4	Unknown	92.9293	7.42356	53.9048	7.02668
Perinatal cTEC	ENSMUSG00000019842	Traf3ip2	1.19528e-11	10	Unknown	73.7374	5.43671	35.1436	5.40652
Perinatal cTEC	ENSMUSG00000022558	Mroh1	1.22349e-11	15	Unknown	60.6061	6.47169	28.3214	5.88264
Perinatal cTEC	ENSMUSG00000024213	Nudt3	1.22898e-11	17	Unknown	100	8.36179	72.8456	7.40321
Perinatal cTEC	ENSMUSG00000002660	Clpp	1.24812e-11	17	Unknown	94.9495	8.4721	58.6625	7.60156
Perinatal cTEC	ENSMUSG00000091512	Lamtor3	1.25641e-11	3	Unknown	93.9394	7.42163	50.0449	6.75661
Perinatal cTEC	ENSMUSG00000035828	Pim3	1.25903e-11	15	Unknown	75.7576	6.75601	31.0144	5.90385
Perinatal cTEC	ENSMUSG00000024446	Rpp21	1.30469e-11	17	Unknown	93.9394	7.0992	52.289	6.22765
Perinatal cTEC	ENSMUSG00000031782	Coq9	1.30469e-11	8	Unknown	85.8586	7.48181	38.8241	6.65069
Perinatal cTEC	ENSMUSG00000020843	Timm22	1.35682e-11	11	Unknown	85.8586	7.52233	39.0934	6.71686
Perinatal cTEC	ENSMUSG00000028608	0610037L13Rik	1.35688e-11	4	Unknown	93.9394	7.34673	51.4811	6.933
Perinatal cTEC	ENSMUSG00000054889	Dsp	1.48125e-11	13	Unknown	97.9798	8.17491	73.4291	8.31033
Perinatal cTEC	ENSMUSG00000060376	Bckdha	1.53631e-11	7	Unknown	78.7879	6.05193	35.368	5.34278
Perinatal cTEC	ENSMUSG00000027076	Timm10	1.59759e-11	2	Unknown	76.7677	6.39146	32.5853	5.83289
Perinatal cTEC	ENSMUSG00000040158	Tax1bp3	1.72121e-11	11	Unknown	97.9798	7.39238	58.5278	7.00899
Perinatal cTEC	ENSMUSG00000032666	1700025G04Rik	1.7387e-11	1	Unknown	100	7.65572	59.6948	6.71946
Perinatal cTEC	ENSMUSG00000030793	Pycard	1.79967e-11	7	Unknown	98.9899	8.0805	60.9515	7.09089
Perinatal cTEC	ENSMUSG00000028634	Hivep3	1.8422e-11	4	Transcription_Factor	87.8788	7.20942	45.7361	6.3348
Perinatal cTEC	ENSMUSG00000038806	Sde2	1.87018e-11	1	Unknown	83.8384	6.30976	41.2029	5.86089
Perinatal cTEC	ENSMUSG00000078921	Tgtp2	1.8739e-11	11	Unknown	90.9091	7.57882	53.2316	7.37028
Perinatal cTEC	ENSMUSG00000049232	Tigd2	1.95464e-11	6	Unknown	67.6768	5.77084	28.456	5.53221
Perinatal cTEC	ENSMUSG00000054263	Lifr	1.95782e-11	15	Unknown	96.9697	8.49277	61.5799	9.35192
Perinatal cTEC	ENSMUSG00000061601	Pclo	1.96557e-11	5	Unknown	75.7576	6.17221	39.6768	5.9493
Perinatal cTEC	ENSMUSG00000004393	Ddx56	2.05677e-11	11	Unknown	81.8182	6.9571	34.8743	6.20772
Perinatal cTEC	ENSMUSG00000030802	Bckdk	2.09232e-11	7	Unknown	88.8889	7.63604	43.6715	7.01228
Perinatal cTEC	ENSMUSG00000058446	Znrf2	2.14043e-11	6	Unknown	80.8081	5.80509	39.0036	5.37045
Perinatal cTEC	ENSMUSG00000002661	Alkbh7	2.14073e-11	17	Unknown	77.7778	6.36733	31.6876	5.72757
Perinatal cTEC	ENSMUSG00000101089	NA	2.16613e-11	NA	Unknown	84.8485	6.43535	38.465	5.6663
Perinatal cTEC	ENSMUSG00000024457	Trim26	2.18888e-11	17	Unknown	81.8182	6.70503	44.8833	6.22263
Perinatal cTEC	ENSMUSG00000005656	Snx6	2.23553e-11	12	Unknown	97.9798	8.0479	62.298	6.91178
Perinatal cTEC	ENSMUSG00000005262	Ufd1l	2.34724e-11	16	Unknown	94.9495	7.32632	52.4237	6.51592
Perinatal cTEC	ENSMUSG00000040151	Hs2st1	2.43709e-11	3	Unknown	86.8687	6.64459	48.6984	6.32557
Perinatal cTEC	ENSMUSG00000039680	Mrps6	2.58536e-11	16	Unknown	86.8687	6.43714	35.6822	5.46676
Perinatal cTEC	ENSMUSG00000022272	Myo10	2.64872e-11	15	Unknown	98.9899	7.23409	65.6643	6.82452
Perinatal cTEC	ENSMUSG00000019373	Cops3	2.68069e-11	11	Unknown	88.8889	7.17276	43.5817	6.60522
Perinatal cTEC	ENSMUSG00000070436	Serpinh1	3.05034e-11	7	Unknown	97.9798	6.69373	55.2065	6.03414
Perinatal cTEC	ENSMUSG00000063273	Naa15	3.08052e-11	3	Unknown	95.9596	6.63889	61.0862	5.61612
Perinatal cTEC	ENSMUSG00000003131	Pafah1b2	3.23279e-11	9	Unknown	93.9394	7.51056	52.0646	6.6295
Perinatal cTEC	ENSMUSG00000033446	Lpar6	3.24958e-11	14	Unknown	60.6061	5.61129	24.6858	5.63526
Perinatal cTEC	ENSMUSG00000020608	Smc6	3.69398e-11	12	Unknown	93.9394	6.95941	52.5135	6.10772
Perinatal cTEC	ENSMUSG00000026727	Rsu1	3.77649e-11	2	Unknown	93.9394	7.62431	52.0197	7.09428
Perinatal cTEC	ENSMUSG00000025785	Exosc7	3.92352e-11	9	Unknown	84.8485	7.16525	36.7145	6.56913
Perinatal cTEC	ENSMUSG00000031245	Hmgn5	3.93765e-11	X	Unknown	88.8889	6.39189	40.7092	5.53329
Perinatal cTEC	ENSMUSG00000028124	Gclm	4.11681e-11	3	Unknown	73.7374	5.92884	32.9443	5.39988
Perinatal cTEC	ENSMUSG00000026192	Atic	4.19734e-11	1	Unknown	76.7677	6.66233	36.2208	5.81779
Perinatal cTEC	ENSMUSG00000028173	Wls	4.25749e-11	3	Unknown	97.9798	8.07409	72.0377	8.07891
Perinatal cTEC	ENSMUSG00000002332	Dhrs1	4.49094e-11	14	Unknown	87.8788	7.6657	40.754	6.90811
Perinatal cTEC	ENSMUSG00000003545	Fosb	4.59522e-11	7	Transcription_Factor	83.8384	7.70121	35.9066	7.06732
Perinatal cTEC	ENSMUSG00000061731	Ext1	4.73873e-11	15	Unknown	74.7475	5.69949	31.0592	5.17387
Perinatal cTEC	ENSMUSG00000029191	Rfc1	5.13424e-11	5	Unknown	83.8384	6.17042	42.0557	5.70111
Perinatal cTEC	ENSMUSG00000027506	Tpd52	5.16829e-11	3	Unknown	98.9899	7.77207	71.2298	7.15371
Perinatal cTEC	ENSMUSG00000028013	Ppa2	5.24278e-11	3	Unknown	89.899	7.3269	45.2873	6.50072
Perinatal cTEC	ENSMUSG00000025986	Slc39a10	5.32182e-11	1	Unknown	76.7677	5.85328	32.8546	5.3205
Perinatal cTEC	ENSMUSG00000014791	Elmo3	5.348e-11	8	Unknown	69.697	6.06688	31.5081	5.63517
Perinatal cTEC	ENSMUSG00000004070	Hmox2	5.43515e-11	16	Unknown	80.8081	6.88489	39.4973	6.32284
Perinatal cTEC	ENSMUSG00000026991	Pkp4	5.8247e-11	2	Unknown	80.8081	6.34274	40.8438	6.06589
Perinatal cTEC	ENSMUSG00000018395	Kif3a	5.83811e-11	11	Unknown	80.8081	6.99453	37.5673	6.16919
Perinatal cTEC	ENSMUSG00000031068	Glrx3	5.94298e-11	7	Unknown	98.9899	8.70991	63.7343	7.62473
Perinatal cTEC	ENSMUSG00000096727	Psmb9	6.00579e-11	17	Unknown	100	10.5682	85.8169	9.24819
Perinatal cTEC	ENSMUSG00000017664	Slc35c2	6.13247e-11	2	Unknown	63.6364	6.23919	25.4937	5.53102
Perinatal cTEC	ENSMUSG00000039852	Rere	6.13247e-11	4	Transcription_Factor	86.8687	5.73084	44.4345	5.45015
Perinatal cTEC	ENSMUSG00000026313	Hdac4	6.69693e-11	1	Unknown	92.9293	6.59642	48.3842	6.34517
Perinatal cTEC	ENSMUSG00000051367	Six1	7.25792e-11	12	Transcription_Factor	97.9798	7.66771	66.0682	7.28602
Perinatal cTEC	ENSMUSG00000035478	Mbd3	7.37156e-11	10	Unknown	93.9394	8.02182	54.3088	6.91552
Perinatal cTEC	ENSMUSG00000026753	Ppp6c	7.46769e-11	2	Unknown	91.9192	7.02258	48.1598	6.08136
Perinatal cTEC	ENSMUSG00000020687	Cdc27	7.54237e-11	11	Unknown	69.697	6.0263	30.0269	5.21969
Perinatal cTEC	ENSMUSG00000003420	Fcgrt	7.6091e-11	7	Unknown	69.697	6.73078	35.3232	7.30891
Perinatal cTEC	ENSMUSG00000070371	Prss36	7.64689e-11	7	Unknown	59.596	5.929	26.0772	5.43935
Perinatal cTEC	ENSMUSG00000050812	AI314180	8.06116e-11	4	Unknown	85.8586	6.15387	46.7235	5.68561
Perinatal cTEC	ENSMUSG00000038708	Golga4	8.11132e-11	9	Unknown	88.8889	7.41251	55.7899	6.82854
Perinatal cTEC	ENSMUSG00000022751	Nit2	8.62777e-11	16	Unknown	70.7071	6.29535	28.3662	5.93132
Perinatal cTEC	ENSMUSG00000004996	Mri1	8.62985e-11	8	Unknown	79.798	7.32746	35.772	6.36265
Perinatal cTEC	ENSMUSG00000017615	Tnfaip1	8.63668e-11	11	Unknown	92.9293	7.37305	52.0646	6.82907
Perinatal cTEC	ENSMUSG00000044986	Tst	8.86627e-11	15	Unknown	95.9596	9.01396	56.6427	8.51086
Perinatal cTEC	ENSMUSG00000019923	Zwint	8.98295e-11	10	Unknown	95.9596	8.89261	58.0341	7.67277
Perinatal cTEC	ENSMUSG00000056999	Ide	9.01956e-11	19	Cell_Surface	83.8384	6.89837	55.386	6.72835
Perinatal cTEC	ENSMUSG00000055053	Nfic	9.07279e-11	10	Transcription_Factor	95.9596	7.18071	59.4704	6.65542
Perinatal cTEC	ENSMUSG00000022517	Mgrn1	9.3767e-11	16	Unknown	70.7071	6.25496	34.605	5.58612
Perinatal cTEC	ENSMUSG00000061838	Suclg2	9.70484e-11	6	Unknown	81.8182	6.27536	36.9838	5.38977
Perinatal cTEC	ENSMUSG00000037822	Smim14	9.84849e-11	5	Unknown	97.9798	8.98573	72.4865	7.79066
Perinatal cTEC	ENSMUSG00000028136	Snx27	9.93732e-11	3	Unknown	87.8788	6.06027	49.8654	5.89443
Perinatal cTEC	ENSMUSG00000048915	Efna5	1.01965e-10	17	Unknown	86.8687	6.39395	40.8887	6.03892
Perinatal cTEC	ENSMUSG00000009076	Zmat5	1.03456e-10	11	Unknown	89.899	6.85177	45.4668	6.26096
Perinatal cTEC	ENSMUSG00000041625	Ggact	1.08719e-10	14	Unknown	64.6465	6.03012	26.7504	5.47452
Perinatal cTEC	ENSMUSG00000024645	Timm21	1.12291e-10	18	Unknown	65.6566	6.10209	26.5709	5.46782
Perinatal cTEC	ENSMUSG00000027534	Snx16	1.16443e-10	3	Unknown	75.7576	6.90054	40.2603	5.80781
Perinatal cTEC	ENSMUSG00000020952	Scfd1	1.19069e-10	12	Unknown	94.9495	7.32806	52.0646	6.62555
Perinatal cTEC	ENSMUSG00000036402	Gng12	1.2332e-10	6	Unknown	90.9091	7.00544	51.93	6.5472
Perinatal cTEC	ENSMUSG00000041895	Wipi1	1.2404e-10	11	Unknown	88.8889	7.22795	40.5745	6.15291
Perinatal cTEC	ENSMUSG00000044502	Bod1	1.26123e-10	11	Unknown	85.8586	7.04938	40.9785	6.25961
Perinatal cTEC	ENSMUSG00000028484	Psip1	1.4107e-10	4	Unknown	100	7.80827	63.9587	6.556
Perinatal cTEC	ENSMUSG00000020083	2010107G23Rik	1.49376e-10	10	Unknown	71.7172	6.23116	32.9892	5.30929
Perinatal cTEC	ENSMUSG00000030539	Sema4b	1.49589e-10	7	Unknown	94.9495	5.68332	66.6517	5.17956
Perinatal cTEC	ENSMUSG00000019804	Snx3	1.52863e-10	10	Unknown	100	9.94966	78.1867	8.32593
Perinatal cTEC	ENSMUSG00000026131	Dst	1.54901e-10	1	Unknown	97.9798	8.07658	77.4686	7.92253
Perinatal cTEC	ENSMUSG00000024906	Mus81	1.57452e-10	19	Unknown	60.6061	6.3116	23.474	5.5838
Perinatal cTEC	ENSMUSG00000004934	Pias4	1.61023e-10	10	Unknown	75.7576	6.8007	39.6768	6.12208
Perinatal cTEC	ENSMUSG00000022201	Zfr	1.69416e-10	15	Unknown	94.9495	7.5627	61.5799	6.95878
Perinatal cTEC	ENSMUSG00000009647	Mcu	1.86213e-10	10	Unknown	85.8586	6.96647	38.1059	5.89947
Perinatal cTEC	ENSMUSG00000042444	Fam63b	1.90169e-10	9	Unknown	79.798	6.4366	41.5619	6.04267
Perinatal cTEC	ENSMUSG00000031585	Gtf2e2	1.91662e-10	8	Unknown	93.9394	7.72749	46.9031	6.5517
[truncated: 2,868 more rows]

## Sheet: Table 3
Supplementary File 1-table 3: Tests for marker proteins in TEC
List of proteins	Technique tested	Worked?	Clone	Host	Conjugate	Provider	Reference number	Staining Pattern
CD177	Histology	Yes	1171A	Rabbit	PE	R&D biosystems	FAB8186P	Staining largely overlaps with CD11b positive cells (non TEC). Most positive cells are in the cortex.
CD177	Flow cytometry	No	1171A	Rabbit	PE	R&D biosystems	FAB8186P
CD177	Flow cytometry	Yes	Y127	Rat	Alexa Fluor 647	BD	566599	By flow cytometry it can only be found in 5-7% of mTEChigh
CD177	Histology	Yes	Y127	Rat	Alexa Fluor 647	BD	566599	Staining largely overlaps with CD11b positive cells. Most positive cells are in the cortex.
CD52	Histology	No	BTG-2G	Rat	PE	MBL	D204-5
Tagln	Histology	No, only unspecific staining from secondary antibody observable	TAGLN/247	Mouse	Unconjugated	Novus Biologicals	NBP2-44435
Lifr	Histology	Yes	Polyclonal	Rabbit	Unconjugated	Proteintech	227779-1-AP	Primarily staining blood vessels, some epithelial pattern observable, present quite ubiquitously the thymic epithelium, no specific populations can be identified using this marker
Lifr	Flow cytometry	No	Polyclonal	Rabbit	Unconjugated	Proteintech	227779-1-AP
Dcamkl1 (Dclk1)	Flow cytometry	No	Polyclonal	Rabbit	Unconjugated	Abcam	ab37994
Itgb4	Flow cytometry	No	346-11A	Rat	Biotin	Biolegend	123603
L1CAM	Flow cytometry	Yes	#555	Rat	Alexa Fluor 700	R&D biosystems	FAB5674N	by FACS found in 9-10% of mTEClo, CD80lo
L1CAM	Histology	No	#555	Rat	Alexa Fluor 700	R&D biosystems	FAB5674N
MMP2	Flow cytometry	Yes	EPR1184	Rabbit	Unconjugated	Abcam	ab92536	Mainly on mTEChigh, similar pattern to CD80
CD271 (NGFR)	Flow cytometry	No	ME20.4	Mouse	PE	eBioscience	12-9400-42
F3 (CD142)	Flow cytometry	Yes	Polyclonal	Rabbit	PE	Sino Biologicals	50413-R001	Present on most of mTEC and cTEC showing low levels of MHCII expression
k5	Histology	Yes	Monoclonal	Rabbit	Unconjugated	Abcam	ab52635	Staining the medulla only
k8	Histology	Yes	TROMA	rat	Unconjugated	Hybridoma bank	N/A	staining the cortex only, very low detection in the medulla
CCL21a	Histology	Yes	Polyclonal	Rabbit	Unconjugated	LS Bio	LS-C104634	staining the medulla only, low detection in the cortex		(CCL21 ligand for CCR7)

## Sheet: Table 4
	Supplementary File 1-table 4: Single-cell defined TEC subtypes and known concordant phenotypes.
	TEC subtype	Locations	Populations	Reference
	nTEC	Unknown1	nTEC	(Wülfing et al., 2018)
			neuroTEC	(Park et al., 2020)
	sTEC	Unknown1
	Perinatal cTEC	Cortex
	Mature cTEC	Cortex	cTEC	(Bornstein et al., 2018)
	Intertypical TEC	Assumed:CMJ2 /Cortex	mTEC I	(Bornstein et al., 2018; Park et al., 2020)
			PDPN+ CCL21+ jTEC	(Onder et al., 2015)
			MHCIIlo TPAlo TEC	(Michel et al., 2017)
			SCA1+ PLET1+ TEC	(Ulyanchenko et al., 2016)
			SCA1hi α6 integrin+ TEC	(Lepletier et al., 2019)
	Proliferating TEC	Cortex & Medulla	mTEC II	(Bornstein et al., 2018; Park et al., 2020)
	Mature mTEC	Medulla	mTEC II	(Bornstein et al., 2018; Park et al., 2020)
	Post-AIRE mTEC	Medulla	mTEC III	(Bornstein et al., 2018; Park et al., 2020)
			Post-AIRE	(Nishikawa et al., 2010)
	Tuft-like TEC	Medulla	mTEC IV	(Bornstein et al., 2018; Park et al., 2020)
				(Miller et al., 2018)
		1assumed cortex in adult. 2Corticomedullary junction

## Sheet: Table 5
	Supplementary File 1-table 5: Details of antibodies used in flow cytometry staining panels to identify TEC and thymocytes undergoing negative selection
	Target	Clone	Fluorophore	Company	Concentration
	Thymic epithelial cell sorting panel
	CD45	30-F11	AF700	BioLegend	1:1000
	EpCAM	G8.8	PerCPCy5.5	BioLegend	1:1000
	UEA-1	Polyclonal	Cy5	Vector Laboratories	1:500
	Ly51	6C3	PE	BioLegend	1:200
	I-A/I-E (MHCII)	M5/114.15.2	FITC	BioLegend	1:1000
	CD80	16-10A1	PECy5	BioLegend	1:1000
	CD86	GL-1	PECy7	BioLegend	1:1000
	DSG3	AK18	Unconjugated	MBL	1:100
	Anti-mouse IgG1	Polyclonal	APC-Cy7	Abcam	1:500
	Thymic epithelial cell intracellular panel
	CD45	30-F11	AF700	BioLegend	1:1000
	EpCAM	G8.8	PerCPCy5.5	BioLegend	1:1000
	UEA-1	Polyclonal	Cy5	Vector Laboratories	1:500
	Ly51	6C3	PE	BioLegend	1:200
	I-A/I-E (MHCII)	M5/114.15.2	BV421	BioLegend	1:1000
	CD80	16-10A1	PECy5	BioLegend	1:1000
	CD86	GL-1	PECy7	BioLegend	1:1000
	AIRE	5H12	AF488	eBioscience	1:1000
	Thymocyte negative selection panel
	CCR7	4B12	BV421	BioLegend	1:200
	CD24	M1/69	PerCP-eFluor710	eBioscience	1:1000
	CD4	RM4-5	FITC	BioLegend	1:500
	CD5	53-7.3	PECy7	BioLegend	1:1000
	CD69	H1.2F3	PECy5	BioLegend	1:1000
	CD8a	53-6.7	AF700	BioLegend	1:1000
	PD-1	RMP1-30	APC	BioLegend	1:500
	TCRb	H57-597	APC-Cy7	BioLegend	1:1000
	CD25	PC61.5	Biotin	BioLegend	1:500
	NK1.1	PK136	Biotin	BioLegend	1:500
	Streptavidin		BV605	BioLegend	1:1000
	FOXP3	FJK-16s	PE-eFluor610	eBioscience	1:1000
	Helios	22F6	PE	BioLegend	1:40
	Thymic epithelial cell CellHashing panel
	Target	Host Species	Clone	Conjugate	Supplier
	CD45	Rat	30-F11	PE-TexasRed	Invitrogen
	EpCAM (CD326)	Rat	G8.8	Biotin	Biolegend
	EpCAM (CD326)	Rat	G8.8	PerCP-Cy5.5	Biolegend
	MHCII (I-A/I-E)	Rat	M5/114.15.2	APC-Cy7	Biolegend
	Ly51	Rat	6C3	PE-Cy7	Biolegend
	UEA1 (Lectin)	N/A	N/A	Biotin	Vector Labs
	MHCI; CD45	Rat	M1/42;	Anti-mouse Hashtag #1 TotalSeq-A Oligo	Biolegend
			30-F11
	MHCI; CD45	Rat	M1/42;	Anti-mouse Hashtag #2 TotalSeq-A Oligo	Biolegend
			30-F11
	MHCI; CD45	Rat	M1/42;	Anti-mouse Hashtag #3 TotalSeq-A Oligo	Biolegend
			30-F11
	MHCI; CD45	Rat	M1/42;	Anti-mouse Hashtag #4 TotalSeq-A Oligo	Biolegend
			30-F11
	MHCI; CD45	Rat	M1/42;	Anti-mouse Hashtag #5 TotalSeq-A Oligo	Biolegend
			30-F11
	MHCI; CD45	Rat	M1/42;	Anti-mouse Hashtag #6 TotalSeq-A Oligo	Biolegend
			30-F11
	MHCII (I-A/I-E)	Rat	M5/114.15.2	TotalSeq-A0117 Oligonucleotide	Biolegend
	Sca1 (Ly6A/E)	Rat	D7	TotalSeq-A0130 Oligonucleotide	Biolegend
	CD24	Rat	M1/69	TotalSeq-A0212 Oligonucleotide	Biolegend
	CD86	Rat	GL-1	TotalSeq-A0200 Oligonucleotide	Biolegend

## Sheet: Table6
	Supplementary File 1-table 6: ADT primers for Droplet sequencing
ADT ID	ADT ID Sequence (unique indexes shown in red)
RPI 1	CAAGCAGAAGACGGCATACGAGATCGTGATGTGACTGGAGTTCCTTGGCACCCGAGAATTCCA
RPI 3	CAAGCAGAAGACGGCATACGAGATGCCTAAGTGACTGGAGTTCCTTGGCACCCGAGAATTCCA
RPI 4	CAAGCAGAAGACGGCATACGAGATTGGTCAGTGACTGGAGTTCCTTGGCACCCGAGAATTCCA
RPI 10	CAAGCAGAAGACGGCATACGAGATAAGCTAGTGACTGGAGTTCCTTGGCACCCGAGAATTCCA
RPI 13	CAAGCAGAAGACGGCATACGAGATTTGACTGTGACTGGAGTTCCTTGGCACCCGAGAATTCCA
RPI 11	CAAGCAGAAGACGGCATACGAGATGTAGCCGTGACTGGAGTTCCTTGGCACCCGAGAATTCCA

## Sheet: Table7
	Supplementary File 1-table 7: HTO primers for Droplet sequencing
HTO ID	HTO ID Sequence (unique indexes shown in red)
HashT1 (Q7005)	CAAGCAGAAGACGGCATACGAGATGTGAATATGTGACTGGAGTTCAGACGTGTGC
HashT2 (Q7006)	CAAGCAGAAGACGGCATACGAGATACAGGCGCGTGACTGGAGTTCAGACGTGTGC
HashT3 (Q7007)	CAAGCAGAAGACGGCATACGAGATCATAGAGTGTGACTGGAGTTCAGACGTGTGC
HashT4 (Q7008)	CAAGCAGAAGACGGCATACGAGATTGCGAGACGTGACTGGAGTTCAGACGTGTGC
HashT5 (Q7015)	CAAGCAGAAGACGGCATACGAGATTCTCTACTGTGACTGGAGTTCAGACGTGTGC
HashT6 (Q7016)	CAAGCAGAAGACGGCATACGAGATCTCTCGTCGTGACTGGAGTTCAGACGTGTGC

## Sheet: Tablel 8
Supplementary File 1-table 8: Tissue specific gene classification via FANTOM5 Cage-Seq:Tissue samples were grouped into 27 broad groups based on the annotation data
id	symbol	Category	Level 2 tissue group	Tau - lev2
ENSMUSG00000000001	Gnai3	Other	Intestine	0.204745
ENSMUSG00000000003	Pbsn	AireDep
ENSMUSG00000000028	Cdc45	TRGs	Lymphoid	0.226414
ENSMUSG00000000031	H19
ENSMUSG00000000037	Scml2	AireEnh	Brain	0.456645
ENSMUSG00000000049	Apoh	TRGs	Liver	0.767204
ENSMUSG00000000056	Narf	Other	Liver	0.300467
ENSMUSG00000000058	Cav2	Other	Lung	0.339981
ENSMUSG00000000078	Klf6	Other	Lymphoid	0.341945
ENSMUSG00000000085	Scmh1	Other	Male_reproductive	0.225141
ENSMUSG00000000088	Cox5a	Other	Heart	0.146141
ENSMUSG00000000093	Tbx2	AireEnh	Lung	0.43309
ENSMUSG00000000094	Tbx4	AireEnh	Lung	0.811703
ENSMUSG00000000103	Zfy2	TRGs
ENSMUSG00000000120	Ngfr	TRGs	PNS	0.619249
ENSMUSG00000000125	Wnt3	Other	Brain	0.778097
ENSMUSG00000000126	Wnt9a	AireEnh	Trachea	0.507829
ENSMUSG00000000127	Fer	Other	Myeloid	0.408511
ENSMUSG00000000131	Xpo6	Other	Lymphoid	0.247001
ENSMUSG00000000134	Tfe3	Other	Myeloid	0.377754
ENSMUSG00000000142	Axin2	Other	Intestine	0.424859
ENSMUSG00000000148	Brat1	Other	Lymphoid	0.452708
ENSMUSG00000000149	Gna12	Other	Myeloid	0.270237
ENSMUSG00000000154	Slc22a18	TRGs	Liver	0.502798
ENSMUSG00000000157	Itgb2l	AireEnh	Myeloid	0.875771
ENSMUSG00000000159	Igsf5	AireEnh	Intestine	0.625657
ENSMUSG00000000167	Pih1d2	TRGs	Male_reproductive	0.590212
ENSMUSG00000000168	Dlat	Other	Heart	0.258218
ENSMUSG00000000171	Sdhd	Other	Heart	0.176566
ENSMUSG00000000182	Fgf23	AireEnh	Lymphoid	0.945375
ENSMUSG00000000183	Fgf6	AireEnh
ENSMUSG00000000184	Ccnd2	Other	Lymphoid	0.267685
ENSMUSG00000000194	Gpr107	Housekeeping	Intestine	0.186993
ENSMUSG00000000197	Nalcn	AireEnh	Brain	0.681424
ENSMUSG00000000202	Btbd17	AireEnh	Brain	0.787971
ENSMUSG00000000204	Slfn4	AireEnh	Myeloid	0.734975
ENSMUSG00000000214	Th	AireEnh	Peripheral_gland	0.836052
ENSMUSG00000000215	Ins2	AireDep	Peripheral_gland	0.838244
ENSMUSG00000000216	Scnn1g	TRGs	Lung	0.754014
ENSMUSG00000000223	Drp2	TRGs	PNS	0.694207
ENSMUSG00000000244	Tspan32	AireEnh	Lymphoid	0.652829
ENSMUSG00000000247	Lhx2	AireEnh	Liver	0.750269
ENSMUSG00000000248	Clec2g	TRGs	Skeleton	0.850657
ENSMUSG00000000253	Gmpr	Other	Liver	0.390031
ENSMUSG00000000263	Glra1	AireEnh	Spinal_cord	0.909398
ENSMUSG00000000266	Mid2	Other	Liver	0.443628
ENSMUSG00000000275	Trim25	Other	Myeloid	0.385019
ENSMUSG00000000276	Dgke	Other	Thymus	0.433915
ENSMUSG00000000278	Scpep1	Other	Myeloid	0.228608
ENSMUSG00000000282	Mnt	Other	Myeloid	0.20652
ENSMUSG00000000290	Itgb2	AireEnh	Myeloid	0.582456
ENSMUSG00000000295	Hddc2	Other	Lymphoid	0.150059
ENSMUSG00000000296	Tpd52l1	Other	Male_reproductive	0.458796
ENSMUSG00000000301	Pemt	TRGs	Liver	0.697647
ENSMUSG00000000303	Cdh1	Other	Cecum	0.33024
ENSMUSG00000000305	Cdh4	TRGs	Brain	0.594981
ENSMUSG00000000308	Ckmt1	Other	Intestine	0.528206
ENSMUSG00000000317	Bcl6b	TRGs	Liver	0.637852
ENSMUSG00000000318	Clec10a	TRGs	Myeloid	0.729781
ENSMUSG00000000320	Alox12	TRGs	Skeleton	0.487802
ENSMUSG00000000325	Arvcf	TRGs	Liver
ENSMUSG00000000326	Comt	Other	Liver
ENSMUSG00000000339	Rtca	Other	Male_reproductive	0.326795
ENSMUSG00000000340	Dbt	Other	Liver	0.465885
ENSMUSG00000000346	Dazap2	Housekeeping	Myeloid	0.756177
ENSMUSG00000000355	Mcts1	Other	Brain	0.191473
ENSMUSG00000000359	Rem1	Other	Male_reproductive	0.504304
ENSMUSG00000000365	Rnf17	AireEnh	Male_reproductive	0.737931
ENSMUSG00000000374	Trappc10	Other
ENSMUSG00000000378	Ccm2	Other	Lymphoid	0.354277
ENSMUSG00000000381	Wap	AireEnh	Peripheral_gland	0.964045
ENSMUSG00000000384	Tbrg4	Other
ENSMUSG00000000385	Tmprss2	Other	Urinary	0.582552
ENSMUSG00000000386	Mx1	TRGs
ENSMUSG00000000392	Fap	AireEnh	Skeleton	0.498176
ENSMUSG00000000394	Gcg	AireEnh	Peripheral_gland	0.769936
ENSMUSG00000000399	Ndufa9	Housekeeping	Liver	0.309312
ENSMUSG00000000402	Egfl6	TRGs	Skeleton	0.482602
ENSMUSG00000000409	Lck	TRGs	Lymphoid	0.721223
ENSMUSG00000000411	Tssk3	TRGs	Male_reproductive	0.997459
ENSMUSG00000000416	Cttnbp2	AireEnh	Brain	0.487265
ENSMUSG00000000420	Galnt1	Other	Lymphoid	0.268707
ENSMUSG00000000435	Myf5	AireEnh	Skeleton	0.827251
ENSMUSG00000000439	Mkrn2	Other	Brain	0.346363
ENSMUSG00000000440	Pparg	Other	Female_reproductive	0.551841
ENSMUSG00000000441	Raf1	Housekeeping	Liver	0.255294
ENSMUSG00000000486	Sept1		Lymphoid	0.519944
ENSMUSG00000000489	Pdgfb	Other	Kidney	0.398384
ENSMUSG00000000530	Acvrl1	AireEnh	Lung	0.513837
ENSMUSG00000000531	Grasp	TRGs	Liver	0.402504
ENSMUSG00000000532	Acvr1b	Other	Myeloid	0.228211
ENSMUSG00000000538	Tom1l2	Other	Intestine	0.286671
ENSMUSG00000000544	Gpa33	TRGs	Intestine	0.794047
ENSMUSG00000000552	Zfp385a	Other	Eye	0.375676
ENSMUSG00000000555	Itga5	AireEnh	Myeloid	0.43145
ENSMUSG00000000560	Gabra2	AireEnh	Spinal_cord	0.777639
ENSMUSG00000000561	Wdr77	Other	Lymphoid	0.172428
ENSMUSG00000000562	Adora3	TRGs	Male_reproductive	0.874373
ENSMUSG00000000563	Atp5f1	Housekeeping	Heart	0.188551
ENSMUSG00000000567	Sox9	Other	Brain	0.329468
ENSMUSG00000000568	Hnrnpd	Other	Myeloid	0.144138
ENSMUSG00000000579	Dynlt1c	Other
ENSMUSG00000000581	C1d	Other	Myeloid	0.260192
ENSMUSG00000000594	Gm2a	AireEnh	Peripheral_gland	0.2595
ENSMUSG00000000600	Krit1	Other	Myeloid	0.306974
ENSMUSG00000000605	Clcn4		Liver	0.251185
ENSMUSG00000000606	Vmn2r88	AireDep
ENSMUSG00000000617	Grm6	AireEnh	Eye	0.99014
ENSMUSG00000000627	Sema4f	AireEnh	PNS	0.695214
ENSMUSG00000000628	Hk2	Other	Myeloid	0.392149
ENSMUSG00000000631	Myo18a	Other	PNS	0.255019
ENSMUSG00000000632	Sez6	TRGs	Brain	0.784339
ENSMUSG00000000673	Haao	TRGs	Liver	0.871767
ENSMUSG00000000682	Cd52	Other	Myeloid	0.450976
ENSMUSG00000000686	Abhd15	TRGs	Liver	0.611176
ENSMUSG00000000690	Hoxb6	AireEnh	Kidney	0.464275
ENSMUSG00000000693	Loxl3	TRGs	Fat	0.51475
ENSMUSG00000000701	Tcl1b5	Other
ENSMUSG00000000706	Btn1a1	AireEnh	Peripheral_gland	0.920201
ENSMUSG00000000708	Kat2b	Other
ENSMUSG00000000711	Rab5b	Other	Myeloid	0.241626
ENSMUSG00000000724	Cryba1	AireEnh	Eye	0.929137
ENSMUSG00000000730	Dnmt3l	TRGs	Male_reproductive	0.809853
ENSMUSG00000000731	Aire	AireEnh	Thymus	0.840165
ENSMUSG00000000732	Icosl	TRGs	Myeloid	0.526923
ENSMUSG00000000738	Spg7	Other	Liver	0.196143
ENSMUSG00000000739	Sult5a1	TRGs	Skin	0.482984
ENSMUSG00000000740	Rpl13	Housekeeping
ENSMUSG00000000743	Chmp1a	Other	Intestine	0.272134
ENSMUSG00000000751	Rpa1	Other	Male_reproductive	0.288458
ENSMUSG00000000753	Serpinf1	Other	Liver	0.307583
ENSMUSG00000000759	Tubgcp3	Other	Liver	0.139841
ENSMUSG00000000766	Oprm1	Other	Brain	0.890029
ENSMUSG00000000776	Polr3d	Other	Brain	0.256272
ENSMUSG00000000782	Tcf7	TRGs	Thymus	0.5974
ENSMUSG00000000787	Ddx3x	Other	Liver	0.375518
ENSMUSG00000000791	Il12rb1	Other		0.844759
ENSMUSG00000000792	Slc5a5	TRGs	Stomach	0.837879
ENSMUSG00000000794	Kcnn3	Other	Thymus	0.572302
ENSMUSG00000000804	Usp32	Other	Brain	0.247261
ENSMUSG00000000805	Car4	AireEnh	Cecum	0.485982
ENSMUSG00000000811	Txnrd3	TRGs	Male_reproductive	0.646986
ENSMUSG00000000817	Fasl	TRGs	Lymphoid	0.90674
ENSMUSG00000000823	Zfp512b		Liver	0.31357
ENSMUSG00000000826	Dnajc5	Other	Brain	0.21021
ENSMUSG00000000827	Tpd52l2	Other	Lymphoid	0.156771
ENSMUSG00000000838	Fmr1	Other	Brain	0.334365
ENSMUSG00000000861	Bcl11a	TRGs	Lymphoid	0.398271
ENSMUSG00000000869	Il4	TRGs	Lymphoid	0.900693
ENSMUSG00000000876	Pxmp4	Other	Liver	0.333775
ENSMUSG00000000881	Dlg3	Other	Brain	0.353561
ENSMUSG00000000884	Gnb1l	TRGs	Brain	0.323685
ENSMUSG00000000889	Dbh	AireEnh	Peripheral_gland	0.811983
ENSMUSG00000000901	Mmp11	TRGs	Fat	0.350923
ENSMUSG00000000902	Smarcb1	Other	Brain	0.210006
ENSMUSG00000000903	Vpreb3	AireEnh	Erythroid	0.662197
ENSMUSG00000000915	Hip1r	Other	Intestine	0.373566
ENSMUSG00000000916	Nsun5	Other	Lymphoid	0.357623
ENSMUSG00000000934	Top1mt	Other	Liver	0.418525
ENSMUSG00000000938	Hoxa10	TRGs	Kidney	0.563939
ENSMUSG00000000942	Hoxa4	TRGs	Liver	0.59131
ENSMUSG00000000948	Gm38393
ENSMUSG00000000957	Mmp14	Other	Myeloid	0.305133
ENSMUSG00000000958	Slc7a7	TRGs	Myeloid	0.503449
ENSMUSG00000000959	Oxa1l	Other	Erythroid	0.273238
ENSMUSG00000000976	Heatr6	Other	Myeloid	0.412106
ENSMUSG00000000982	Ccl3	AireEnh	Myeloid	0.715929
ENSMUSG00000000983	Wfdc18	AireEnh	Peripheral_gland	0.763108
ENSMUSG00000001014	Icam4	TRGs	Erythroid	0.776875
ENSMUSG00000001016	Ilf2	Other	Brain	0.18016
ENSMUSG00000001017	Chtop	Other	Myeloid	0.472837
ENSMUSG00000001018	Snapin	Other	Male_reproductive	0.115886
ENSMUSG00000001020	S100a4	Other	Fat	0.490338
ENSMUSG00000001021	S100a3	Other	Skin	0.947576
ENSMUSG00000001023	S100a5	TRGs	Brain	0.911972
ENSMUSG00000001025	S100a6	Other	Trachea	0.349959
ENSMUSG00000001027	Scn4a	TRGs
ENSMUSG00000001029	Icam2	TRGs	Liver	0.420274
ENSMUSG00000001034	Mapk7	Other	Brain	0.206197
ENSMUSG00000001036	Epn2	Other	Liver	0.283262
ENSMUSG00000001039	B9d1	TRGs	Male_reproductive	0.428675
ENSMUSG00000001052	Sec24b	Other	Myeloid	0.307571
ENSMUSG00000001053	N4bp3	TRGs	Brain	0.445832
ENSMUSG00000001054	Rmnd5b	Other	Male_reproductive	0.306795
ENSMUSG00000001056	Nhp2	Other	Erythroid	0.206416
ENSMUSG00000001062	Vps9d1	Other	Myeloid	0.26942
ENSMUSG00000001065	Zfp276	Other	PNS	0.547314
ENSMUSG00000001076	C1ql4	Other
ENSMUSG00000001082	Mfsd10	Other	Brain	0.199916
ENSMUSG00000001089	Luzp1	Other	Male_reproductive	0.356874
ENSMUSG00000001095	Slc13a2	TRGs	Intestine	0.773834
ENSMUSG00000001098	Kctd10	Other	Brain	0.237509
ENSMUSG00000001100	Poldip2	Other	Brain	0.164755
ENSMUSG00000001103	Sebox	AireEnh	Liver	0.894071
ENSMUSG00000001105	Ift20	Other	Liver	0.318805
ENSMUSG00000001119	Col6a1	Other	Skeleton	0.280717
ENSMUSG00000001120	Pcbp3	TRGs	Male_reproductive	0.476362
ENSMUSG00000001123	Lgals9	Other	Liver	0.260143
ENSMUSG00000001127	Araf	Other	Brain	0.156084
ENSMUSG00000001128	Cfp	TRGs	Myeloid	0.618657
ENSMUSG00000001131	Timp1	TRGs	Skeleton	0.427568
ENSMUSG00000001134	Uxt	Other	Erythroid	0.42053
ENSMUSG00000001138	Cnnm3	Other	Liver	0.212642
ENSMUSG00000001143	Lman2l	Other	Brain	0.23247
ENSMUSG00000001150	Mcm3ap	Other	Erythroid	0.240899
ENSMUSG00000001151	Pcnt	Other	Brain	0.299837
ENSMUSG00000001155	Ftcd	AireEnh	Liver	0.883848
ENSMUSG00000001156	Mxd1	Other	Intestine	0.448387
ENSMUSG00000001157	Gmcl1	Other	Male_reproductive	0.457684
ENSMUSG00000001158	Snrnp27	Other	Myeloid	0.342154
ENSMUSG00000001166	Oas1c	AireEnh	Myeloid	0.607572
ENSMUSG00000001168	Oas1h	AireEnh
ENSMUSG00000001173	Ocrl	Other	Myeloid	0.247846
ENSMUSG00000001175	Calm1	Other	Male_reproductive	0.515878
ENSMUSG00000001211	Agpat3	Other	Male_reproductive	0.277285
ENSMUSG00000001225	Slc26a3	AireEnh	Cecum	0.847073
ENSMUSG00000001227	Sema6b	Other	Brain	0.522674
ENSMUSG00000001228	Uhrf1	Other	Brain	0.248132
ENSMUSG00000001229	Dpp9	Other	Erythroid	0.274953
ENSMUSG00000001240	Ramp2	AireEnh	Liver	0.429759
ENSMUSG00000001247	Lsr	Other	Liver	0.452302
ENSMUSG00000001248	Gramd1a	Other	Erythroid	0.331683
ENSMUSG00000001249	Hpn	TRGs	Liver	0.650285
ENSMUSG00000001260	Gabrg1	TRGs
ENSMUSG00000001270	Ckb	Other	Brain	0.431561
ENSMUSG00000001280	Sp1	Other	Brain	0.263632
ENSMUSG00000001281	Itgb7	TRGs	Lymphoid	0.701217
ENSMUSG00000001285	Myg1	Other	Brain	0.159243
ENSMUSG00000001288	Rarg	Other	Liver	0.354098
ENSMUSG00000001289	Pfdn5	Housekeeping	Male_reproductive	0.348195
ENSMUSG00000001300	Efnb2	Other	Brain	0.268091
ENSMUSG00000001305	Rrp15	Other	Myeloid	0.309957
ENSMUSG00000001313	Rnd2	TRGs	PNS	0.469016
ENSMUSG00000001323	Srr	Other	Liver	0.362981
ENSMUSG00000001333	Sync	TRGs	Skeleton	0.511567
ENSMUSG00000001334	Fndc5	AireEnh	Heart	0.599819
ENSMUSG00000001348	Acp5	AireEnh	Skeleton	0.49322
ENSMUSG00000001349	Cnn1	AireEnh	Urinary	0.481843
ENSMUSG00000001366	Fbxo9	Other	Liver	0.277413
ENSMUSG00000001376	Vps50		Myeloid	0.31717
ENSMUSG00000001380	Hars	Other	Lymphoid	0.184255
ENSMUSG00000001383	Zmat2	Other	Myeloid	0.394957
ENSMUSG00000001403	Ube2c	Other	Erythroid	0.193872
ENSMUSG00000001415	Smg5	Other	Male_reproductive	0.273123
ENSMUSG00000001416	Cct3	Other	Male_reproductive	0.146231
ENSMUSG00000001418	Glmp		Brain	0.219436
ENSMUSG00000001419	Mef2d	Other	Lymphoid	0.228038
ENSMUSG00000001420	Tmem79	TRGs	Female_reproductive	0.504725
ENSMUSG00000001424	Snd1	Other	Peripheral_gland	0.252714
ENSMUSG00000001435	Col18a1	Other	Liver	0.365038
ENSMUSG00000001436	Slc19a1	AireEnh	Erythroid	0.394222
ENSMUSG00000001440	Kpnb1	Housekeeping	Liver	0.148474
ENSMUSG00000001441	Npepps	Other	Liver	0.238637
ENSMUSG00000001444	Tbx21	TRGs	Lymphoid	0.839339
ENSMUSG00000001445	Mrpl10	Other	Erythroid	0.163601
ENSMUSG00000001467	Cyp51	Other	Liver	0.262172
ENSMUSG00000001472	Tcf25	Other	Peripheral_gland	0.163941
ENSMUSG00000001473	Tubb6	Other	Brain	0.222943
ENSMUSG00000001482	Def8	Other	Brain	0.264218
ENSMUSG00000001493	Meox1	TRGs	Heart	0.518839
ENSMUSG00000001494	Sost	AireEnh	Artery	0.74695
ENSMUSG00000001496	Nkx2-1	AireEnh	Lung	0.863823
ENSMUSG00000001497	Pax9	TRGs	Skeletal_muscle	0.765833
ENSMUSG00000001504	Irx2	TRGs	Peripheral_gland	0.592929
ENSMUSG00000001506	Col1a1	AireEnh	Skeleton	0.27993
ENSMUSG00000001507	Itga3	TRGs	Brain	0.367394
ENSMUSG00000001508	Sgca	AireEnh	Skeleton	0.700809
ENSMUSG00000001510	Dlx3	Other	Skin	0.772155
ENSMUSG00000001517	Foxm1	TRGs	Male_reproductive	0.454219
ENSMUSG00000001518	Itfg2	Other	Erythroid	0.347434
ENSMUSG00000001520	Nrip2	AireEnh	Brain	0.682962
ENSMUSG00000001521	Tulp3	Other	Brain	0.327232
ENSMUSG00000001524	Gtf2h4	Other	Thymus	0.322625
ENSMUSG00000001525	Tubb5	Other	Brain	0.134841
ENSMUSG00000001542	Ell2	Other	Lymphoid	0.354996
ENSMUSG00000001552	Jup	Other	Female_reproductive	0.3168
ENSMUSG00000001555	Fkbp10	AireEnh	Skin	0.29827
ENSMUSG00000001558	Klhl10	TRGs	Male_reproductive	0.998943
ENSMUSG00000001566	Mnx1	AireEnh	Intestine	0.845498
ENSMUSG00000001569	Nom1	Other	Myeloid	0.347562
ENSMUSG00000001576	Ergic1	Other	Peripheral_gland	0.210905
ENSMUSG00000001583	Tnk1	Other	Intestine	0.646413
ENSMUSG00000001588	Acap1	Other	Lymphoid	0.653397
ENSMUSG00000001604	Tcea3	AireEnh	Skeleton	0.426676
ENSMUSG00000001622	Csn3	TRGs	Peripheral_gland	0.876913
ENSMUSG00000001627	Ifrd1	Other	Lymphoid	0.362791
ENSMUSG00000001630	Stk38l	Other	Lymphoid	0.346553
ENSMUSG00000001632	Brpf1	Other	Lymphoid	0.246759
ENSMUSG00000001642	Akr1b3	Other
ENSMUSG00000001655	Hoxc13	AireEnh	Skin	0.842945
ENSMUSG00000001656	Hoxc11	Other
ENSMUSG00000001657	Hoxc8	AireEnh	Spinal_cord	0.699594
ENSMUSG00000001661	Hoxc6	Other	Fat	0.591495
ENSMUSG00000001663	Gstt1	Other	Liver	0.475225
ENSMUSG00000001665	Gstt3	Other	Liver	0.449362
ENSMUSG00000001666	Ddt	Other	Liver	0.386506
ENSMUSG00000001670	Tat	AireEnh	Liver	0.918475
ENSMUSG00000001672	Marveld3	Other	Intestine	0.581366
ENSMUSG00000001674	Ddx18	Other	Myeloid	0.332681
ENSMUSG00000001687	Ubl3	Other	Male_reproductive	0.348996
ENSMUSG00000001700	Gramd3	Other	Lymphoid	0.400259
ENSMUSG00000001707	Eef1e1	Other	Lymphoid	0.270524
ENSMUSG00000001729	Akt1	Other	Erythroid	0.145897
ENSMUSG00000001739	Cldn15	AireEnh	Intestine	0.631204
ENSMUSG00000001741	Il16	Other	Myeloid	0.513412
ENSMUSG00000001750	Tcirg1	TRGs	Myeloid	0.450413
ENSMUSG00000001751	Naglu	Other	Myeloid	0.356327
ENSMUSG00000001755	Coasy	Other	Liver	0.408047
ENSMUSG00000001761	Smo	Other	PNS	0.277747
ENSMUSG00000001763	Tspan33	TRGs	Erythroid	0.615401
ENSMUSG00000001767	Crnkl1	Other	Myeloid	0.331296
ENSMUSG00000001768	Rin2	Other	Myeloid	0.548313
ENSMUSG00000001773	Folh1	AireEnh	Kidney	0.803027
ENSMUSG00000001774	Chordc1	Other	Myeloid	0.329397
ENSMUSG00000001783	Rtcb	Other	Liver	0.285182
ENSMUSG00000001785	Pwp1	Housekeeping	Lymphoid	0.253362
ENSMUSG00000001786	Fbxo7	Other	Erythroid	0.405912
ENSMUSG00000001794	Capns1	Other	Brain	0.190002
ENSMUSG00000001802	Lrp3	AireEnh	Liver	0.378211
ENSMUSG00000001804	Dsg4	Other	Skin	0.963142
ENSMUSG00000001815	Evx2	AireDep
ENSMUSG00000001819	Hoxd13	AireDep	Skeleton	0.940811
ENSMUSG00000001823	Hoxd12	Other	Skeleton	0.919786
ENSMUSG00000001827	Folr1	AireEnh	Peripheral_gland	0.754708
ENSMUSG00000001829	Clpb	Other	Male_reproductive	0.477141
ENSMUSG00000001833	Sept7		Myeloid	0.345883
ENSMUSG00000001844	Zdhhc4	Other	Male_reproductive	0.395446
ENSMUSG00000001847	Rac1	Housekeeping	Intestine	0.131243
ENSMUSG00000001855	Nup214	Other	PNS	0.286755
ENSMUSG00000001864	Aif1l	Other	Female_reproductive	0.452305
ENSMUSG00000001865	Cpa3	AireDep	Skeleton	0.594028
ENSMUSG00000001870	Ltbp1	AireEnh	Artery	0.361825
ENSMUSG00000001891	Ugp2	Other	Liver	0.41115
ENSMUSG00000001901	Kcnh6	Other	PNS	0.742771
ENSMUSG00000001909	Trmt1	Other	Male_reproductive	0.229182
ENSMUSG00000001910	Nacc1	Other	Erythroid	0.283037
ENSMUSG00000001911	Nfix	Other	Brain	0.307161
ENSMUSG00000001918	Slc1a5	Other	Lymphoid	0.34527
ENSMUSG00000001924	Uba1	Other	Brain	0.182594
ENSMUSG00000001930	Vwf	Other	Liver	0.613846
ENSMUSG00000001942	Siae	Other	Liver	0.394285
ENSMUSG00000001943	Vsig2	TRGs	Stomach	0.859197
ENSMUSG00000001946	Esam	Other	Liver	0.412087
ENSMUSG00000001948	Spa17	TRGs	Male_reproductive	0.687546
ENSMUSG00000001962	Fam50a	Other	Myeloid	0.392578
ENSMUSG00000001964	Emd	Other	Fat	0.20506
ENSMUSG00000001983	Taco1	Other	Heart	0.225101
ENSMUSG00000001985	Grik3	AireEnh	Brain	0.741918
ENSMUSG00000001986	Gria3	TRGs	Brain	0.572495
ENSMUSG00000001988	Npas1	AireEnh	Brain	0.910363
ENSMUSG00000001995	Sipa1l2	Other	Myeloid	0.252781
ENSMUSG00000001998	Ap4e1	Other	Lymphoid	0.277206
ENSMUSG00000001999	Blvra	Other	Myeloid	0.394547
ENSMUSG00000002006	Pdzd4	TRGs	Brain	0.565492
ENSMUSG00000002007	Srpk3	AireEnh	Skeleton	0.601658
ENSMUSG00000002010	Idh3g	Other	Artery	0.263152
ENSMUSG00000002012	Pnck	AireEnh	Brain	0.600183
ENSMUSG00000002014	Ssr4	Other	Peripheral_gland	0.212068
ENSMUSG00000002015	Bcap31	Other	Myeloid	0.299838
ENSMUSG00000002017	Fam98a	Other	Male_reproductive	0.34199
ENSMUSG00000002020	Ltbp2	TRGs	Lung	0.64202
ENSMUSG00000002028	Kmt2a	Other	Lymphoid	0.254612
ENSMUSG00000002031	Ift46	Other	Liver	0.362015
ENSMUSG00000002032	Tmem25	Other	Brain	0.580465
ENSMUSG00000002033	Cd3g	AireEnh	Lymphoid	0.704083
ENSMUSG00000002043	Trappc6a	Other	Lymphoid	0.219568
ENSMUSG00000002052	Supt6	Other	Myeloid	0.432694
ENSMUSG00000002055	Spag5	Other	Erythroid	0.393091
ENSMUSG00000002057	Foxn1	Other	Skin	0.797851
ENSMUSG00000002058	Unc119	Other	Eye	0.355457
ENSMUSG00000002059	Rab34	Other	PNS	0.372074
ENSMUSG00000002064	Sdf2	Housekeeping	Trachea	0.169791
ENSMUSG00000002068	Ccne1	TRGs	Lymphoid	0.340409
ENSMUSG00000002076	Hsf2bp	TRGs	Male_reproductive	0.93274
ENSMUSG00000002083	Bbc3	Other	Liver	0.350924
ENSMUSG00000002100	Mybpc3	AireEnh	Heart	0.899386
ENSMUSG00000002102	Psmc3	Other	Myeloid	0.344204
ENSMUSG00000002103	Acp2	Other	Myeloid	0.368169
ENSMUSG00000002104	Rapsn	AireEnh		0.639409
ENSMUSG00000002105	Slc39a13	Other	Brain	0.281724
ENSMUSG00000002107	Celf2	Other	Myeloid	0.376375
ENSMUSG00000002108	Nr1h3	TRGs	Myeloid	0.602558
ENSMUSG00000002109	Ddb2	Other	Lymphoid	0.497759
ENSMUSG00000002111	Spi1	AireEnh	Myeloid	0.565125
ENSMUSG00000002129	Sf3a1	Housekeeping	Erythroid	0.174336
ENSMUSG00000002147	Stat6	Other	Lymphoid	0.295997
ENSMUSG00000002190	Clgn	AireDep	Male_reproductive	0.859649
ENSMUSG00000002204	Napsa	Other	Kidney	0.613954
ENSMUSG00000002205	Vrk3	Other	Male_reproductive	0.372619
ENSMUSG00000002210	Smg9	TRGs	Erythroid	0.340364
ENSMUSG00000002221	Paxip1	Other	Erythroid	0.346818
ENSMUSG00000002222	Rmnd5a	Other	Thymus	0.410774
ENSMUSG00000002227	Mov10	TRGs	Erythroid	0.510648
ENSMUSG00000002228	Ppm1j	TRGs	Male_reproductive	0.532046
ENSMUSG00000002233	Rhoc	Other	PNS	0.171517
ENSMUSG00000002240	Prr27		Male_reproductive	0.98613
ENSMUSG00000002249	Tead3	TRGs	Skin	0.216641
ENSMUSG00000002250	Ppard	TRGs	Intestine	0.29899
ENSMUSG00000002257	Def6	Other	Lymphoid	0.409435
ENSMUSG00000002265	Peg3	Other	Brain	0.264455
ENSMUSG00000002266	Zim1	AireEnh
ENSMUSG00000002274	Metrn	TRGs	Brain	0.696871
ENSMUSG00000002279	Lmf1	Other	Male_reproductive	0.273494
ENSMUSG00000002280	Narfl	Other	Lymphoid	0.136493
ENSMUSG00000002289	Angptl4	Other	Liver	0.374773
ENSMUSG00000002297	Dbf4	Other	Brain	0.306469
ENSMUSG00000002307	Daxx	Other	Myeloid	0.595754
ENSMUSG00000002308	Cd320	TRGs	Female_reproductive	0.342029
ENSMUSG00000002319	Ipo4	Other	Male_reproductive	0.368654
ENSMUSG00000002320	Tm9sf1	Other	Brain	0.128175
ENSMUSG00000002324	Rec8	TRGs	Intestine	0.536835
ENSMUSG00000002325	Irf9	Other	Myeloid	0.32867
ENSMUSG00000002326	Gmpr2	Other	Myeloid	0.336138
ENSMUSG00000002329	Mdp1	Other	Intestine	0.156785
ENSMUSG00000002332	Dhrs1	Other	Brain	0.3648
ENSMUSG00000002341	Ncan	AireEnh	Brain	0.826969
ENSMUSG00000002342	Tmem161a	Other	PNS	0.262797
ENSMUSG00000002343	Armc6	Other	Brain	0.352113
ENSMUSG00000002345	Borcs8
ENSMUSG00000002346	Slc25a42	TRGs	Artery	0.39569
ENSMUSG00000002365	Snx9	Other	Intestine	0.320908
ENSMUSG00000002372	Ranbp3	Other	Myeloid	0.241214
ENSMUSG00000002379	Ndufa11	Other
ENSMUSG00000002384	Bmp8b	AireEnh	Intestine	0.796025
ENSMUSG00000002393	Nr2f6	Other	Liver	0.408574
ENSMUSG00000002395	Use1	Other	Lymphoid	0.234111
ENSMUSG00000002396	Ocel1	TRGs	Male_reproductive	0.343787
ENSMUSG00000002409	Dyrk1b	TRGs	Male_reproductive	0.319099
ENSMUSG00000002413	Braf	Other	Lymphoid	0.291179
ENSMUSG00000002416	Ndufb2	Housekeeping	Brain	0.172806
ENSMUSG00000002428	Hltf	Other	Myeloid	0.332446
ENSMUSG00000002455	Prpf6	Other	Myeloid	0.25182
ENSMUSG00000002458	Rgs19	Other	Myeloid	0.305163
ENSMUSG00000002459	Rgs20	TRGs	Brain	0.677059
ENSMUSG00000002475	Abhd3	Other
ENSMUSG00000002477	Snrpd1	Other
ENSMUSG00000002486	Tchp	TRGs	Male_reproductive	0.466574
ENSMUSG00000002489	Tiam1	Other	Lymphoid	0.406739
ENSMUSG00000002496	Tsc2	Other	Erythroid	0.32289
ENSMUSG00000002500	Rpl3l	AireEnh	Skeleton	0.803901
ENSMUSG00000002504	Slc9a3r2	Other	Liver	0.381555
ENSMUSG00000002524	Puf60	Other	Myeloid	0.181153
ENSMUSG00000002546	Golga2	Other	Lymphoid	0.283695
ENSMUSG00000002550	Uck1	Other	Brain	0.223909
ENSMUSG00000002565	Scin	TRGs	Intestine	0.616971
ENSMUSG00000002578	Ikzf4	TRGs	Lymphoid	0.783402
ENSMUSG00000002580	Mien1	Other	Lymphoid	0.267215
ENSMUSG00000002588	Pon1	AireEnh	Liver	0.800801
ENSMUSG00000002602	Axl	Other	PNS	0.312468
ENSMUSG00000002603	Tgfb1	Other	Lymphoid	0.435509
ENSMUSG00000002608	Ccdc97	Other	Brain	0.208047
ENSMUSG00000002617	Zfp40	Other	Brain	0.558227
ENSMUSG00000002625	Akap8l	Other	Lymphoid	0.245295
ENSMUSG00000002633	Shh	AireEnh	Urinary	0.612218
ENSMUSG00000002635	Pdcd2l	Other	Male_reproductive	0.237074
ENSMUSG00000002658	Gtf2f1	Other	Myeloid	0.320537
ENSMUSG00000002660	Clpp	Other	Liver	0.173175
ENSMUSG00000002661	Alkbh7	Other	Heart	0.158222
ENSMUSG00000002664	Pspn	Other
ENSMUSG00000002668	Dennd1c	TRGs	Myeloid	0.649393
ENSMUSG00000002679	Med6	Other	Myeloid	0.217404
ENSMUSG00000002688	Prkd1	Other	Brain	0.308424
ENSMUSG00000002699	Lcp2	AireEnh	Myeloid	0.612081
ENSMUSG00000002718	Cse1l	Other	Myeloid	0.200648
ENSMUSG00000002728	Naa20	Other	Myeloid	0.233568
ENSMUSG00000002731	Prkra	Other	Brain	0.259896
ENSMUSG00000002732	Fkbp7	Other	Skeleton	0.275266
ENSMUSG00000002733	Plekha3	Other	Male_reproductive	0.412085
ENSMUSG00000002741	Ykt6	Other	Myeloid	0.150043
ENSMUSG00000002748	Baz1b	Other	Brain	0.254142
ENSMUSG00000002763	Pex6	Other	Intestine	0.245046
ENSMUSG00000002767	Mrpl2	Other	Liver	0.176318
ENSMUSG00000002768	Mea1	Other	Male_reproductive	0.374119
ENSMUSG00000002769	Gnmt	TRGs	Liver	0.795965
ENSMUSG00000002771	Grin2d	TRGs	Spinal_cord	0.902513
ENSMUSG00000002778	Kdelr1	Other	Brain	0.18021
ENSMUSG00000002781	Tmem143	TRGs	Artery	0.356567
ENSMUSG00000002797	Ggct	Other	Skin	0.467983
ENSMUSG00000002799	Jag2	TRGs	Brain	0.417409
ENSMUSG00000002803	Btbd6	Other	PNS	0.369257
ENSMUSG00000002804	Nudt14	Other	Trachea	0.225546
ENSMUSG00000002808	Epdr1	Other	Brain	0.326564
ENSMUSG00000002812	Flii	Other	Myeloid	0.0892936
ENSMUSG00000002814	Top3a	Other	Male_reproductive	0.222383
ENSMUSG00000002820	Atg4d	Other	Intestine	0.320638
ENSMUSG00000002825	Qtrt1	Other	Brain	0.364351
ENSMUSG00000002831	Plin4	AireEnh	Artery	0.49312
ENSMUSG00000002833	Hdgfrp2	TRGs	Liver	0.308223
ENSMUSG00000002835	Chaf1a	Other	Male_reproductive	0.368394
ENSMUSG00000002844	Adprh	Other	Myeloid	0.164984
ENSMUSG00000002845	Tmem39a	Other	Peripheral_gland	0.196437
ENSMUSG00000002846	Timmdc1	Other	Liver	0.23126
ENSMUSG00000002847	Pla1a	TRGs	Female_reproductive	0.582529
ENSMUSG00000002870	Mcm2	Other	Lymphoid	0.227452
ENSMUSG00000002871	Tpra1	Other	Myeloid	0.336494
ENSMUSG00000002881	Nab1	Other	Liver	0.378926
ENSMUSG00000002885	Adgre5		Lung	0.316379
ENSMUSG00000002897	Il17ra	Other	Myeloid	0.422127
ENSMUSG00000002900	Lamb1	Other	PNS	0.225723
ENSMUSG00000002908	Kcnn1	AireEnh	Brain	0.829553
ENSMUSG00000002910	Arrdc2	TRGs		0.326252
ENSMUSG00000002930	Ppp1r17	AireEnh	Brain	0.859437
ENSMUSG00000002944	Cd36	AireEnh	Myeloid	0.496168
ENSMUSG00000002948	Map2k7	Other	Male_reproductive	0.375805
ENSMUSG00000002949	Timm44	Other	Liver	0.281903
ENSMUSG00000002957	Ap2a2	Other	Brain	0.206694
ENSMUSG00000002963	Pnkp	Other	Myeloid	0.532913
ENSMUSG00000002968	Med25	Other	Brain	0.207522
ENSMUSG00000002980	Bcam	TRGs	Lung	0.325468
ENSMUSG00000002981	Clptm1	Other	Brain	0.14732
ENSMUSG00000002983	Relb	TRGs	Liver	0.475104
ENSMUSG00000002984	Tomm40	Other	Brain	0.144989
ENSMUSG00000002985	Apoe	Other	Liver	0.374065
ENSMUSG00000002992	Apoc2	AireEnh	Liver	0.688228
ENSMUSG00000002996	Hbp1	Other	Myeloid	0.312009
ENSMUSG00000002997	Prkar2b	AireEnh	Artery	0.339559
ENSMUSG00000003031	Cdkn1b	Other	Brain	0.222109
ENSMUSG00000003032	Klf4	Other	Lymphoid	0.386937
ENSMUSG00000003033	Ap1m1	Other	Male_reproductive	0.338142
ENSMUSG00000003037	Rab8a	Other	Myeloid	0.305791
ENSMUSG00000003038	Hmgn2	Housekeeping
ENSMUSG00000003039	Fam32a	Housekeeping	Myeloid	0.356032
ENSMUSG00000003051	Elf3	TRGs	Intestine	0.501209
ENSMUSG00000003053	Cyp2c29	AireEnh	Liver	0.906982
ENSMUSG00000003062	Stard3nl	Other	Myeloid	0.291064
ENSMUSG00000003068	Stk11	Other	Lymphoid	0.251461
ENSMUSG00000003070	Efna2	Other	PNS	0.403545
ENSMUSG00000003072	Atp5d	Other	Heart	0.0971725
ENSMUSG00000003099	Ppp5c	Other	Liver	0.264445
ENSMUSG00000003119	Cdk12	Other	Liver	0.261342
ENSMUSG00000003123	Lipe	Other	Male_reproductive	0.529886
ENSMUSG00000003131	Pafah1b2	Other	Brain	0.185739
ENSMUSG00000003134	Tbc1d8	Other	Myeloid	0.47043
ENSMUSG00000003135	Cnot11	Other	Male_reproductive	0.189891
ENSMUSG00000003153	Slc2a3	AireEnh	Myeloid	0.591246
ENSMUSG00000003154	Foxj2	Other	Erythroid	0.283542
ENSMUSG00000003161	Sri	Other	Myeloid	0.262106
ENSMUSG00000003166	Dgcr2	Other	Brain	0.206165
ENSMUSG00000003184	Irf3	Other	Lymphoid	0.206619
ENSMUSG00000003190	Bcl2l12	Other	Male_reproductive	0.260288
ENSMUSG00000003198	Zfp959	Other
ENSMUSG00000003199	Mpnd	Other	Intestine	0.277386
ENSMUSG00000003200	Sh3gl1	Other	Brain	0.153775
ENSMUSG00000003206	Ebi3	TRGs	Myeloid	0.614778
ENSMUSG00000003208	Ccdc94	Other	Lymphoid	0.409204
ENSMUSG00000003226	Ranbp2	Other	Lymphoid	0.229936
ENSMUSG00000003227	Edar	Other	Male_reproductive	0.666568
ENSMUSG00000003228	Grk5	Other
ENSMUSG00000003233	Dvl3	Other	PNS	0.290814
ENSMUSG00000003234	Abcf3	Other	Myeloid	0.247961
ENSMUSG00000003235	Eif2b5	Housekeeping	Lymphoid	0.188187
ENSMUSG00000003269	Cyth2	Other	Lymphoid	0.297085
ENSMUSG00000003271	Sult2b1	TRGs	Intestine	0.604842
ENSMUSG00000003273	Car11	TRGs	PNS	0.600183
ENSMUSG00000003279	Dlgap1	TRGs	Brain	0.709672
ENSMUSG00000003282	Plag1	Other	Female_reproductive	0.308645
ENSMUSG00000003283	Hck	AireEnh	Myeloid	0.620703
ENSMUSG00000003299	Mrpl4	Other	Brain	0.132398
ENSMUSG00000003308	Keap1	Other	Liver	0.325627
ENSMUSG00000003309	Ap1m2	Other	Intestine	0.372653
ENSMUSG00000003316	Glg1	Other	Myeloid	0.150417
ENSMUSG00000003341	Atp8b3	AireEnh	Male_reproductive	0.959129
ENSMUSG00000003344	Btbd2	Other	Erythroid	0.210384
ENSMUSG00000003345	Csnk1g2	Other	Male_reproductive	0.296024
ENSMUSG00000003346	Abhd17a	Other	Intestine	0.222503
ENSMUSG00000003348	Mob3a	Other	Myeloid	0.342902
ENSMUSG00000003352	Cacnb3	Other	Brain	0.36375
ENSMUSG00000003354	Ccdc65	AireEnh	Male_reproductive	0.787493
ENSMUSG00000003355	Fkbp11	AireEnh	Peripheral_gland	0.524719
ENSMUSG00000003360	Ddx23	Other	Myeloid	0.284479
ENSMUSG00000003363	Pld3	Other	Myeloid	0.303262
ENSMUSG00000003378	Grik5	TRGs	Brain	0.638606
ENSMUSG00000003379	Cd79a	AireEnh	Lymphoid	0.668118
ENSMUSG00000003380	Rabac1	Other	Liver	0.252788
ENSMUSG00000003382	Etv3	Other	Myeloid	0.395055
ENSMUSG00000003402	Prkcsh	Other	Brain	0.236315
ENSMUSG00000003410	Elavl3	AireEnh	Brain	0.79894
ENSMUSG00000003411	Rab3b	AireEnh	Brain	0.536536
ENSMUSG00000003418	St8sia6	TRGs	Eye	0.656436
ENSMUSG00000003420	Fcgrt	Other	Intestine	0.380489
ENSMUSG00000003421	Nosip	Other	Myeloid	0.214235
ENSMUSG00000003423	Pih1d1	Other	Male_reproductive	0.297532
ENSMUSG00000003429	Rps11	Housekeeping	Erythroid	0.185336
ENSMUSG00000003435	Supt5	Housekeeping	Myeloid	0.279534
ENSMUSG00000003436	Dll3	TRGs	Male_reproductive	0.697798
ENSMUSG00000003437	Paf1	Other	Lymphoid	0.249115
ENSMUSG00000003438	Timm50	Other	Erythroid	0.170669
ENSMUSG00000003444	Med29	Other	Lymphoid	0.396726
ENSMUSG00000003452	Bicd1	Other	PNS	0.486192
ENSMUSG00000003458	Ncstn	Other	Male_reproductive	0.139574
ENSMUSG00000003464	Pex19	Other	Liver	0.273829
ENSMUSG00000003469	Phyhip	AireEnh	Brain	0.680654
ENSMUSG00000003476	Crhr2	AireEnh	Skeleton	0.785013
ENSMUSG00000003477	Inmt	AireEnh	Liver	0.688202
ENSMUSG00000003484	Cyp4f18	AireEnh	Myeloid	0.828181
ENSMUSG00000003500	Impdh1	Other	Erythroid	0.319147
ENSMUSG00000003505	Psg18	AireEnh	Female_reproductive	0.978293
ENSMUSG00000003518	Dusp3	Other	Liver	0.33313
ENSMUSG00000003526	Prodh	TRGs		0.419172
ENSMUSG00000003527	Dgcr14	Other	PNS	0.344887
ENSMUSG00000003528	Slc25a1	Other	Peripheral_gland	0.269249
ENSMUSG00000003531	Dgcr6	Other		0.329502
ENSMUSG00000003534	Ddr1	Other	Brain	0.336259
ENSMUSG00000003541	Ier3	Other	Myeloid	0.375878
ENSMUSG00000003545	Fosb	TRGs	Lymphoid	0.613291
ENSMUSG00000003546	Klc4	Other	Intestine	0.543568
ENSMUSG00000003549	Ercc1	Other	Male_reproductive	0.251996
ENSMUSG00000003555	Cyp17a1	TRGs	Male_reproductive	0.864258
ENSMUSG00000003559	As3mt	Other	Liver	0.360807
ENSMUSG00000003573	Homer3	TRGs	Brain	0.272085
ENSMUSG00000003575	Crtc1	Other	Brain	0.440731
ENSMUSG00000003581	Rnf215	Other	Lymphoid	0.275048
ENSMUSG00000003585	Sec14l2	TRGs	Liver	0.607069
ENSMUSG00000003604	Aven	TRGs	Lymphoid	0.313961
ENSMUSG00000003617	Cp	Other	Liver	0.569249
ENSMUSG00000003623	Crot	Other	Liver	0.420721
ENSMUSG00000003644	Rps6ka1	Other	Intestine	0.399686
ENSMUSG00000003657	Calb2	AireEnh	Brain	0.713289
ENSMUSG00000003660	Snrnp200	Other	Liver	0.18282
ENSMUSG00000003662	Ciao1	Other	Myeloid	0.28584
ENSMUSG00000003665	Has1	AireEnh	Lymphoid	0.786968
ENSMUSG00000003680	Taf6l	Other	Brain	0.453204
ENSMUSG00000003721	Insig2	Other	Liver	0.652691
ENSMUSG00000003731	Kpna6	Other	Male_reproductive	0.388176
ENSMUSG00000003746	Man1a	Other	Lymphoid	0.416717
ENSMUSG00000003752	Itpkc	Other	Liver	0.44545
ENSMUSG00000003762	Adck4	Other	Intestine	0.265155
ENSMUSG00000003778	Brd8	Other	Myeloid	0.243264
ENSMUSG00000003779	Kif20a	Other	Erythroid	0.211609
ENSMUSG00000003808	Farsa	Other	PNS	0.205939
ENSMUSG00000003809	Gcdh	TRGs	Liver	0.509597
ENSMUSG00000003810	Mast2	Other	Intestine	0.345423
ENSMUSG00000003812	Dnase2a	TRGs	Myeloid	0.460129
ENSMUSG00000003813	Rad23a	Other	Erythroid	0.266061
ENSMUSG00000003814	Calr	Other	Myeloid	0.283461
ENSMUSG00000003824	Syce2	Other	Myeloid	0.436638
ENSMUSG00000003847	Nfat5	Other	Myeloid	0.297404
ENSMUSG00000003848	Nob1	Other	Lymphoid	0.250752
ENSMUSG00000003849	Nqo1	TRGs	Stomach	0.402305
ENSMUSG00000003863	Ppfia3	Other	Myeloid	0.601244
ENSMUSG00000003865	Gys1	TRGs	Myeloid	0.367597
ENSMUSG00000003868	Ruvbl2	Other	Male_reproductive	0.302155
ENSMUSG00000003872	Lin7b	TRGs	Brain	0.760257
ENSMUSG00000003873	Bax	Other	Skin	0.219608
ENSMUSG00000003882	Il7r	TRGs	Lymphoid	0.739325
ENSMUSG00000003923	Tfam	Other	Male_reproductive	0.359186
ENSMUSG00000003929	Zfp81	Other	Brain	0.263801
ENSMUSG00000003934	Efnb3	TRGs	Spinal_cord	0.565668
ENSMUSG00000003948	Mmd	Other	Liver	0.353431
ENSMUSG00000003949	Hlf	Other	Lymphoid	0.426602
ENSMUSG00000003955	Fam162a	Other	Stomach	0.220745
ENSMUSG00000003970	Rpl8	Housekeeping	Lymphoid	0.20835
ENSMUSG00000003974	Grm3	AireEnh	Brain	0.84471
ENSMUSG00000003992	Ssbp2	Other	Thymus	0.265412
ENSMUSG00000004018	Fancl	Other	Erythroid	0.344891
ENSMUSG00000004031	Brinp2	TRGs	Brain	0.76934
ENSMUSG00000004032	Gstm5	AireEnh	Male_reproductive	0.494723
ENSMUSG00000004035	Gstm7	AireEnh	Male_reproductive	0.551075
ENSMUSG00000004038	Gstm3	AireEnh	Intestine	0.813073
ENSMUSG00000004040	Stat3	Other	Lymphoid	0.279107
ENSMUSG00000004043	Stat5a	Other	Lymphoid	0.519208
ENSMUSG00000004044	Ptrf	Other	Brain	0.33268
ENSMUSG00000004054	Map3k11	Other	Lymphoid	0.388343
ENSMUSG00000004056	Akt2	Other	Artery	0.229797
ENSMUSG00000004069	Dnaja3	Other	Liver	0.272629
ENSMUSG00000004070	Hmox2	Other	Myeloid	0.266815
ENSMUSG00000004071	Cdip1	Other	Brain	0.249678
ENSMUSG00000004085	Zak	Other	Skeleton	0.270881
ENSMUSG00000004096	Cwc15	Other	Myeloid	0.403017
ENSMUSG00000004098	Col5a3	AireEnh	PNS	0.442302
ENSMUSG00000004099	Dnmt1	Other	Myeloid	0.200249
ENSMUSG00000004100	Ppan	Other	Lymphoid	0.366194
ENSMUSG00000004105	Angptl2	Other	Liver	0.361248
ENSMUSG00000004110	Cacna1e	TRGs	Brain	0.949678
ENSMUSG00000004113	Cacna1b	TRGs	Brain	0.734895
ENSMUSG00000004127	Trmt10a	Other	Male_reproductive	0.430249
ENSMUSG00000004151	Etv1	Other	Brain	0.399632
ENSMUSG00000004187	Kifc2	TRGs	Brain	0.643217
ENSMUSG00000004207	Psap	Other	Myeloid	0.325666
ENSMUSG00000004221	Ikbkg	Other	Myeloid	0.387834
ENSMUSG00000004231	Pax2	AireEnh	Male_reproductive	0.841342
ENSMUSG00000004233	Wars2	Other	Lymphoid	0.237475
ENSMUSG00000004263	Atn1	Other	Liver	0.192728
ENSMUSG00000004264	Phb2	Housekeeping	Liver	0.144659
ENSMUSG00000004266	Ptpn6	Other	Myeloid	0.50717
ENSMUSG00000004267	Eno2	TRGs	Brain	0.584837
ENSMUSG00000004268	Emg1	Other	Erythroid	0.152398
ENSMUSG00000004270	Lpcat3	Other	Eye	0.32841
ENSMUSG00000004285	Atp6v1f	Housekeeping	Myeloid	0.329091
ENSMUSG00000004296	Il12b	AireEnh	Myeloid	0.941301
ENSMUSG00000004317	Clcn5	Other	Lymphoid	0.395438
ENSMUSG00000004319	Clcn3	Other	Erythroid	0.250842
ENSMUSG00000004328	Hif3a	TRGs	Lung	0.388902
ENSMUSG00000004341	Gpx6	TRGs	Male_reproductive	0.88859
ENSMUSG00000004344	Gpx5	AireDep	Male_reproductive	0.983645
ENSMUSG00000004347	Pde1c	Other	Male_reproductive	0.748467
ENSMUSG00000004356	Utp20	Other	Lymphoid	0.266188
ENSMUSG00000004359	Spic	TRGs	Myeloid	0.712936
ENSMUSG00000004360	9330159F19Rik	AireEnh	Skeleton	0.604999
ENSMUSG00000004364	Cul3	Other	Male_reproductive	0.320946
ENSMUSG00000004366	Sst	AireEnh	Stomach	0.673003
ENSMUSG00000004371	Il11	Other	Kidney	0.883892
ENSMUSG00000004383	Large	Other
ENSMUSG00000004393	Ddx56	Other	Brain	0.247996
ENSMUSG00000004394	Tmed4	Other	Intestine	0.222204
ENSMUSG00000004415	Col26a1	AireEnh	PNS	0.367784
ENSMUSG00000004446	Bid	Other	Lymphoid	0.359782
ENSMUSG00000004451	Ralb	Other	Myeloid	0.188706
ENSMUSG00000004455	Ppp1cc	Housekeeping	Male_reproductive	0.29221
ENSMUSG00000004460	Dnajb11	Other	Peripheral_gland	0.247125
ENSMUSG00000004462	Tbccd1	Other	PNS	0.233924
ENSMUSG00000004473	Clec11a	TRGs	Skeleton	0.589927
ENSMUSG00000004500	Zfp324	Other	Brain	0.338364
ENSMUSG00000004508	Gab2	Other	Liver	0.326928
ENSMUSG00000004530	Coro1c	Other	PNS	0.234409
ENSMUSG00000004535	Tax1bp1	Housekeeping	Myeloid	0.260473
ENSMUSG00000004540	Psg17	AireEnh	Female_reproductive	0.998845
ENSMUSG00000004542	Psg19	AireEnh	Female_reproductive	0.995779
ENSMUSG00000004552	Ctse	Other	Stomach	0.538408
ENSMUSG00000004558	Ndrg2	Other	Liver	0.411627
ENSMUSG00000004561	Mettl17	Other	Brain	0.24032
ENSMUSG00000004562	Arhgef40	Other	PNS	0.283382
ENSMUSG00000004565	Pnpla6	Other	Intestine	0.361607
ENSMUSG00000004567	Mcoln1	Other	Liver	0.331873
ENSMUSG00000004568	Arhgef18	Other	Trachea	0.235389
ENSMUSG00000004591	Pkn2	Other	Lymphoid	0.205613
ENSMUSG00000004609	Cd33	AireEnh	Myeloid	0.647546
ENSMUSG00000004610	Etfb	Other	Liver	0.331642
ENSMUSG00000004612	Nkg7	AireEnh	Lymphoid	0.605521
ENSMUSG00000004613	Lim2	AireDep	Eye	0.908221
ENSMUSG00000004626	Stxbp2	Other	Myeloid	0.305501
ENSMUSG00000004630	Pcp2	AireEnh	Brain	0.950461
ENSMUSG00000004631	Sgce	Other	Skeleton	0.312157
ENSMUSG00000004633	Chn2	TRGs	Male_reproductive	0.552913
ENSMUSG00000004637	Wwox	Other	Brain	0.32123
ENSMUSG00000004642	Slbp	Other	Lymphoid	0.195611
ENSMUSG00000004651	Tyr	TRGs	Eye	0.871202
ENSMUSG00000004654	Ghrhr	TRGs	Brain_gland	0.976371
ENSMUSG00000004655	Aqp1	AireEnh	Liver	0.459342
ENSMUSG00000004661	Arid3b	TRGs	Lymphoid	0.315695
ENSMUSG00000004665	Cnn2	Other	Myeloid	0.253147
ENSMUSG00000004667	Polr2e	Other	Lymphoid	0.105429
ENSMUSG00000004668	Abca13	AireEnh	Myeloid	0.813833
ENSMUSG00000004677	Myo9b	Other	Erythroid	0.336267
ENSMUSG00000004698	Hdac9	Other	Heart	0.488158
ENSMUSG00000004707	Ly9	TRGs	Myeloid	0.690085
ENSMUSG00000004709	Cd244	TRGs
ENSMUSG00000004730	Adgre1		Myeloid	0.633958
ENSMUSG00000004748	Mtfp1	Other	Heart	0.378748
ENSMUSG00000004768	Rab23	Other	Brain	0.370391
ENSMUSG00000004771	Rab11a	Housekeeping	Myeloid	0.102744
ENSMUSG00000004788	Eif2b2	Housekeeping	Lymphoid	0.213088
ENSMUSG00000004789	Dlst	Other	Liver	0.270093
ENSMUSG00000004791	Pgf	AireEnh	Heart	0.512901
ENSMUSG00000004798	Ulk2	Other	Male_reproductive	0.352581
ENSMUSG00000004814	Ccl24	AireEnh	Myeloid	0.672249
ENSMUSG00000004815	Dgkq	Other	Intestine	0.434385
ENSMUSG00000004821	Tmed11	TRGs	Peripheral_gland	0.931646
ENSMUSG00000004837	Grap	TRGs	Lymphoid	0.56974
ENSMUSG00000004842	Pou1f1	AireEnh	Brain_gland	0.986501
ENSMUSG00000004843	Chmp2b	Other	Intestine	0.223959
ENSMUSG00000004846	Plod3	Other	PNS	0.34818
ENSMUSG00000004849	Ap1s1	Other	Brain	0.175446
ENSMUSG00000004864	Mapk13	Other	Intestine	0.488568
ENSMUSG00000004865	Srpk1	Other	Male_reproductive	0.290765
ENSMUSG00000004872	Pax3	AireEnh	Brain	0.872789
ENSMUSG00000004880	Lbr	Other	Myeloid	0.314263
ENSMUSG00000004885	Crabp2	AireEnh	Brain	0.345849
ENSMUSG00000004891	Nes	AireEnh	PNS	0.382749
ENSMUSG00000004892	Bcan	AireEnh	Brain	0.824317
ENSMUSG00000004894	Hapln2	AireEnh	Spinal_cord	0.942159
ENSMUSG00000004895	Prcc	Other	Brain	0.167472
ENSMUSG00000004896	Rrnad1	Other	Brain_gland	0.173757
ENSMUSG00000004897	Hdgf	Other	Erythroid	0.187942
ENSMUSG00000004902	Slc25a18	AireEnh	Brain	0.931045
ENSMUSG00000004929	Thop1	TRGs	Male_reproductive	0.28705
ENSMUSG00000004931	Apba3	Other	Intestine	0.305396
ENSMUSG00000004933	Matk	TRGs	Myeloid	0.613898
ENSMUSG00000004934	Pias4	TRGs	Male_reproductive	0.370132
ENSMUSG00000004936	Map2k1	Other	Myeloid	0.248952
ENSMUSG00000004937	Sgta	Other	Male_reproductive	0.197019
ENSMUSG00000004939	Nmrk2	TRGs	Heart	0.841127
ENSMUSG00000004945	Tmem242	Other	Liver	0.284571
ENSMUSG00000004947	Dtx2	Other	Myeloid	0.299614
ENSMUSG00000004948	Zp3	AireEnh	Female_reproductive	0.987399
ENSMUSG00000004951	Hspb1	AireEnh	Liver	0.570348
ENSMUSG00000004952	Rasa4	TRGs	Myeloid	0.49358
ENSMUSG00000004961	Syt5	TRGs
ENSMUSG00000004980	Hnrnpa2b1	Other	Myeloid	0.691653
ENSMUSG00000004988	Fxyd4	TRGs	Female_reproductive	0.809706
ENSMUSG00000004994	Ccdc130	TRGs	Male_reproductive	0.387323
ENSMUSG00000004996	Mri1	Other	PNS	0.174328
ENSMUSG00000005034	Prkacb	Other	Brain	0.424418
ENSMUSG00000005043	Sgsh	Other	Myeloid	0.403467
ENSMUSG00000005045	Chd5	AireEnh	Male_reproductive	0.812063
ENSMUSG00000005054	Cstb	Other	Myeloid	0.354333
ENSMUSG00000005057	Sh2b2	TRGs	Brain	0.532358
ENSMUSG00000005069	Pex5	Other	Intestine	0.260029
ENSMUSG00000005078	Jkamp	Other	Brain	0.221304
ENSMUSG00000005087	Cd44	Other	Myeloid	0.313151
ENSMUSG00000005089	Slc1a2	TRGs	Brain	0.755935
ENSMUSG00000005102	Eif2ak4	Other	Liver	0.276321
ENSMUSG00000005103	Wdr1	Other	Myeloid	0.204653
ENSMUSG00000005107	Slc2a9	Other	Myeloid	0.368109
ENSMUSG00000005124	Wisp1	TRGs	Brain	0.418936
ENSMUSG00000005125	Ndrg1	Other	Kidney	0.32763
ENSMUSG00000005131	4930550C14Rik	TRGs	Male_reproductive	0.833675
ENSMUSG00000005142	Man2b1	Other	Myeloid	0.321112
ENSMUSG00000005148	Klf5	AireEnh	Cecum	0.309377
ENSMUSG00000005150	Wdr83	Other	Lymphoid	0.298953
ENSMUSG00000005161	Prdx2	Other	Erythroid	0.226867
ENSMUSG00000005198	Polr2a	Other	Lymphoid	0.192661
ENSMUSG00000005202	Shbg	AireEnh	Male_reproductive	0.9227
ENSMUSG00000005204	Senp3	Other	Liver	0.266582
ENSMUSG00000005220	Corin	TRGs	Heart	0.795859
ENSMUSG00000005225	Plekha8	Other	Male_reproductive	0.326027
ENSMUSG00000005232	G6pc2	TRGs	Peripheral_gland	0.953189
ENSMUSG00000005233	Spc25	Other	Brain	0.240751
ENSMUSG00000005237	Dnah2	AireEnh
ENSMUSG00000005251	Ripk4	Other	Intestine	0.398108
ENSMUSG00000005262	Ufd1l	Other	Myeloid	0.186326
ENSMUSG00000005267	Zfp287	Other	PNS	0.478104
ENSMUSG00000005268	Prlr	Other	Liver	0.536348
ENSMUSG00000005299	Letm1	Other	Intestine	0.317402
ENSMUSG00000005312	Ubqln1	Other	Male_reproductive	0.238997
ENSMUSG00000005320	Fgfr4	AireEnh	Liver	0.595596
ENSMUSG00000005338	Cadm3	Other	Brain	0.574756
ENSMUSG00000005339	Fcer1a	AireEnh	Lymphoid	0.840034
ENSMUSG00000005354	Txn2	Housekeeping	Liver	0.163077
ENSMUSG00000005355	Casp14	AireEnh	Skeleton	0.819656
ENSMUSG00000005357	Slc1a6	AireEnh	Brain	0.723385
ENSMUSG00000005360	Slc1a3	Other	Brain	0.495739
ENSMUSG00000005362	Crbn	Other	Myeloid	0.411403
ENSMUSG00000005364	Il5ra	AireEnh	Lymphoid	0.825744
ENSMUSG00000005370	Msh6	Other	Brain	0.25634
ENSMUSG00000005371	Fbxo11	Other	Myeloid	0.271847
ENSMUSG00000005373	Mlxipl	TRGs	Liver	0.566841
ENSMUSG00000005374	Tbl2	Other	Male_reproductive	0.261279
ENSMUSG00000005378	Wbscr22	Other	Lymphoid	0.188247
ENSMUSG00000005397	Nid1	AireEnh
ENSMUSG00000005410	Mcm5	Other	Erythroid	0.233011
ENSMUSG00000005413	Hmox1	Other	Myeloid	0.461791
ENSMUSG00000005417	Mprip	Other	Liver	0.161412
ENSMUSG00000005442	Cic	Other	Myeloid	0.386754
ENSMUSG00000005447	Pafah1b3	Other	Brain	0.293316
ENSMUSG00000005465	Il27ra	TRGs	Lymphoid	0.65795
ENSMUSG00000005469	Prkaca	Other	Skeleton	0.190051
ENSMUSG00000005470	Asf1b	Other	Erythroid	0.356002
ENSMUSG00000005474	Myl10	AireEnh	Male_reproductive	0.903763
ENSMUSG00000005481	Ddx39	Other	Lymphoid	0.164218
ENSMUSG00000005483	Dnajb1	Other	Liver	0.422422
ENSMUSG00000005493	Msh4	TRGs
ENSMUSG00000005501	Usp40	Other	Myeloid	0.26818
ENSMUSG00000005503	Evx1	Other
ENSMUSG00000005505	Kbtbd4	Other		0.237373
ENSMUSG00000005506	Celf1	Other	Liver	0.244185
ENSMUSG00000005510	Ndufs3	Other
ENSMUSG00000005514	Por	Other	Liver	0.306753
ENSMUSG00000005533	Igf1r	Other	Lymphoid	0.314645
ENSMUSG00000005534	Insr	Other	Liver	0.268671
ENSMUSG00000005540	Fcer2a	TRGs	Lymphoid	0.76241
ENSMUSG00000005547	Cyp2a5	TRGs	Liver	0.844863
ENSMUSG00000005553	Atp4a	TRGs	Stomach	0.888101
ENSMUSG00000005566	Trim28	Other	Skeleton	0.1296
ENSMUSG00000005575	Ube2m	Other	Intestine	0.149463
ENSMUSG00000005580	Adcy9	Other	Brain	0.484515
ENSMUSG00000005583	Mef2c	AireEnh	Brain	0.449063
ENSMUSG00000005609	Ctr9	Other	Lymphoid	0.273434
ENSMUSG00000005610	Eif4g2	Other	Lymphoid	0.113165
ENSMUSG00000005611	Mrvi1	AireEnh	Urinary	0.556315
ENSMUSG00000005615	Pcyt1a	Other	Intestine	0.304452
ENSMUSG00000005621	Zfp592	Other	Lymphoid	0.285072
ENSMUSG00000005625	Psmd4	Other	Myeloid	0.211803
ENSMUSG00000005628	Tmod4	TRGs	Skeleton	0.733002
ENSMUSG00000005640	Insrr	Other	Kidney	0.732711
ENSMUSG00000005649	Cabp5	AireEnh	Eye	0.995259
ENSMUSG00000005656	Snx6	Other	Myeloid	0.275757
ENSMUSG00000005667	Mthfd2	Other	Lymphoid	0.386825
ENSMUSG00000005672	Kit	Other	Liver	0.418671
ENSMUSG00000005674	Tomm40l	Other	Brain	0.27709
ENSMUSG00000005677	Nr1i3	TRGs	Liver	0.861566
ENSMUSG00000005681	Apoa2	AireEnh	Liver	0.789674
ENSMUSG00000005682	Pan2	Other	Lymphoid	0.244208
ENSMUSG00000005683	Cs	Housekeeping	Heart	0.203312
ENSMUSG00000005686	Ampd3	Other	Female_reproductive	0.54538
ENSMUSG00000005687	Bcas2	Other	Male_reproductive	0.203724
ENSMUSG00000005696	Sh2d1a	TRGs	Thymus	0.836242
ENSMUSG00000005698	Ctcf	Housekeeping	Thymus	0.145241
ENSMUSG00000005699	Pard6a	TRGs	Brain	0.419614
ENSMUSG00000005705	Agrp	AireEnh	Erythroid	0.431332
ENSMUSG00000005716	Pvalb	Other	Skeleton	0.678215
ENSMUSG00000005718	Tfap4	Other	Myeloid	0.343287
ENSMUSG00000005732	Ranbp1	Other		0.120958
ENSMUSG00000005763	Cd247	TRGs	Lymphoid	0.764925
ENSMUSG00000005774	Rfx5	Other	Lymphoid	0.39692
ENSMUSG00000005779	Psmb4	Housekeeping	Brain	0.170199
ENSMUSG00000005800	Mmp8	AireEnh	Myeloid	0.804896
ENSMUSG00000005802	Slc30a4	Other		0.388306
ENSMUSG00000005803	Sqrdl	Other	Cecum	0.33616
ENSMUSG00000005804	Bloc1s6	Other	Myeloid	0.219016
ENSMUSG00000005813	Metap1	Housekeeping	Liver	0.130402
ENSMUSG00000005823	Gpr108	Other	Cecum	0.163935
ENSMUSG00000005824	Tnfsf14	AireEnh	Lymphoid	0.811601
ENSMUSG00000005836	Gata6	Other	Liver	0.505703
ENSMUSG00000005846	Rsl1d1	Other	Lymphoid	0.197822
ENSMUSG00000005864	Cnga2	Other
ENSMUSG00000005871	Apc	Other	Brain	0.331211
ENSMUSG00000005873	Reep5	Other	Peripheral_gland	0.269808
ENSMUSG00000005881	Ergic3	Other	Brain	0.147128
ENSMUSG00000005882	Uqcc1	Other	Liver	0.284127
ENSMUSG00000005883	Spo11	TRGs	Male_reproductive	0.850886
ENSMUSG00000005886	Ncoa2	Other	Lymphoid	0.27249
ENSMUSG00000005891	Prl4a1	AireDep	Female_reproductive	0.91314
ENSMUSG00000005892	Trh	AireDep	Brain	0.847073
ENSMUSG00000005893	Nr2c2	Other	Liver	0.199417
ENSMUSG00000005897	Nr2c1	Other	PNS	0.278158
ENSMUSG00000005899	Smpd4	Other	Brain	0.189832
ENSMUSG00000005907	Pex1	Other	Liver	0.373878
ENSMUSG00000005917	Otx1	TRGs	Eye	0.788484
ENSMUSG00000005936	Kctd20	Other	Erythroid	0.31464
ENSMUSG00000005947	Itgae	AireEnh	Lymphoid	0.782203
ENSMUSG00000005949	Ctns	Other	Peripheral_gland	0.282882
ENSMUSG00000005950	P2rx5	TRGs	Artery	0.679191
ENSMUSG00000005951	Shpk	TRGs	Erythroid	0.435167
ENSMUSG00000005952	Trpv1	AireEnh
ENSMUSG00000005958	Ephb3	Other	PNS	0.323937
ENSMUSG00000005968	Tuft1	Other	Intestine	0.509589
ENSMUSG00000005973	Rcn1	Other	Peripheral_gland	0.357923
ENSMUSG00000005980	Dnase1	TRGs	Peripheral_gland	0.890615
ENSMUSG00000005981	Trap1	Other	Liver	0.185989
ENSMUSG00000005982	Naa60	Other	Male_reproductive	0.296842
ENSMUSG00000005983	1700037C18Rik	TRGs	Male_reproductive	0.586695
ENSMUSG00000005986	Ankrd13d	TRGs	Spinal_cord	0.458304
ENSMUSG00000005994	Tyrp1	AireDep	Eye	0.875347
ENSMUSG00000006005	Tpr	Other	Myeloid	0.337063
ENSMUSG00000006007	Pdc	AireEnh	Eye	0.993387
ENSMUSG00000006010	BC003331	Other	Myeloid	0.32
ENSMUSG00000006014	Prg4	AireEnh	Liver	0.725983
ENSMUSG00000006019	Dhx34	TRGs	Peripheral_gland	0.629903
ENSMUSG00000006021	Kptn	Other	Brain	0.318176
ENSMUSG00000006024	Napa	Other	Lymphoid	0.11367
ENSMUSG00000006050	Sra1	Other	Erythroid	0.153985
ENSMUSG00000006056	Calcoco2	AireEnh
ENSMUSG00000006057	Atp5g1	Other	Heart	0.289102
ENSMUSG00000006058	Snf8	Housekeeping	Brain	0.162001
ENSMUSG00000006095	Tbcb	Other	Brain	0.14388
ENSMUSG00000006127	Inpp5k	Other	Male_reproductive	0.25232
ENSMUSG00000006134	Crkl	Housekeeping	Myeloid	0.217805
ENSMUSG00000006143	Upk3bl	AireEnh	Trachea	0.700279
ENSMUSG00000006154	Eps8l1	Other	Lymphoid	0.626499
ENSMUSG00000006169	Clint1	Other	Myeloid	0.177287
ENSMUSG00000006179	Prss16	Other	Thymus	0.823449
ENSMUSG00000006191	Cdkal1	Other	Male_reproductive	0.267359
ENSMUSG00000006200	Rhox6	AireEnh
ENSMUSG00000006204	5430419D17Rik	AireEnh	Peripheral_gland	0.957415
ENSMUSG00000006205	Htra1	Other	Female_reproductive	0.448798
ENSMUSG00000006215	Zbtb17	Other	Lymphoid	0.316995
ENSMUSG00000006216	Clcnkb	AireEnh	Kidney	0.94004
ENSMUSG00000006218	Fam131c	AireEnh	Spinal_cord	0.663408
ENSMUSG00000006219	Fblim1	Other	Myeloid	0.511551
ENSMUSG00000006221	Hspb7	AireEnh	Male_reproductive	0.685764
ENSMUSG00000006235	Epor	AireEnh	Erythroid	0.685014
ENSMUSG00000006241	Ccdc159	TRGs	Brain	0.493097
ENSMUSG00000006262	Mob1b	Other	Liver	0.178889
ENSMUSG00000006269	Atp6v1b1	AireEnh	Kidney	0.785834
ENSMUSG00000006270	Vax1	Other	Brain	0.934621
ENSMUSG00000006273	Atp6v1b2	Other	Myeloid	0.329927
ENSMUSG00000006276	Eps15l1	Other	Brain	0.119564
ENSMUSG00000006281	Tep1	Other	Intestine	0.359113
ENSMUSG00000006288	Ttc5	Other
ENSMUSG00000006289	Osgep	Other	Erythroid	0.123064
ENSMUSG00000006299	Aamp	Other	Liver	0.186701
ENSMUSG00000006301	Tmbim1	Other	Intestine	0.231936
ENSMUSG00000006304	Arpc2	Housekeeping	Myeloid	0.254394
ENSMUSG00000006307	Kmt2b	Other	PNS	0.321349
ENSMUSG00000006310	Zbtb32	TRGs	Male_reproductive	0.838302
ENSMUSG00000006311	Etv2	AireEnh	Male_reproductive	0.988416
ENSMUSG00000006313	Upk1a	TRGs	Eye	0.900654
ENSMUSG00000006315	Tmem147	Other	Liver	0.188911
ENSMUSG00000006333	Rps9	Housekeeping	Lymphoid	0.321099
ENSMUSG00000006335	Tfpt	Other	Myeloid	0.494261
ENSMUSG00000006342	Susd2	Other	Intestine	0.406712
ENSMUSG00000006344	Ggt5	TRGs	Liver	0.447462
ENSMUSG00000006345	Ggt1	AireEnh	Intestine	0.696631
ENSMUSG00000006356	Crip2	Other	Heart	0.289578
ENSMUSG00000006360	Crip1	Other	Intestine	0.363369
ENSMUSG00000006362	Cbfa2t3	Other	Peripheral_gland	0.440411
ENSMUSG00000006369	Fbln1	AireEnh	Brain	0.390269
ENSMUSG00000006373	Pgrmc1	Other	Liver	0.365304
ENSMUSG00000006378	Gcat	TRGs
ENSMUSG00000006386	Tek	TRGs	Liver	0.546575
ENSMUSG00000006389	Mpl	AireEnh	Erythroid	0.72284
ENSMUSG00000006390	Elovl1	Other	Eye	0.244691
ENSMUSG00000006392	Med8	Other	Myeloid	0.339079
ENSMUSG00000006398	Cdc20	Other	Liver	0.307705
ENSMUSG00000006403	Adamts4	TRGs	Lymphoid	0.50778
ENSMUSG00000006411	Pvrl4	TRGs	Skin	0.552554
ENSMUSG00000006412	Pfdn2	Other	Lymphoid	0.221647
ENSMUSG00000006418	Rnf114	Other	Myeloid	0.240747
ENSMUSG00000006423	C330007P06Rik	Other
ENSMUSG00000006435	Neurl1a	TRGs	Brain	0.591738
ENSMUSG00000006442	Srm	Other	Lymphoid	0.221742
ENSMUSG00000006445	Epha2	TRGs	Intestine	0.513827
ENSMUSG00000006456	Rbm14	Other	Lymphoid	0.791939
ENSMUSG00000006457	Actn3	TRGs	Skeleton	0.687695
ENSMUSG00000006462	A530013C23Rik
ENSMUSG00000006463	Zdhhc24	Other	Brain	0.361802
ENSMUSG00000006464	Bbs1	TRGs	Male_reproductive	0.369707
ENSMUSG00000006469	Slc34a3	AireEnh	Kidney	0.921137
ENSMUSG00000006471	Ndor1	Other	Lymphoid	0.210089
ENSMUSG00000006476	Nsmf	Other	Brain	0.372854
ENSMUSG00000006488	Prl7a1	TRGs
ENSMUSG00000006490	Prl8a9	TRGs	Female_reproductive	0.958335
ENSMUSG00000006494	Pdk1	Other	Liver	0.291318
ENSMUSG00000006498	Ptbp1	Other	Lymphoid	0.20596
ENSMUSG00000006517	Mvd	Other	Skin	0.229698
ENSMUSG00000006519	Cyba	Other	Myeloid	0.383857
ENSMUSG00000006522	Itih3	AireEnh	Liver	0.720932
ENSMUSG00000006526	Tmem110	TRGs	Peripheral_gland	0.2057
ENSMUSG00000006527	Sfmbt1	Other	Male_reproductive	0.447893
ENSMUSG00000006529	Itih1	TRGs	Liver	0.891944
ENSMUSG00000006538	Ihh	AireEnh	Cecum	0.694115
ENSMUSG00000006542	Prkag3	TRGs	Skeleton	0.794839
ENSMUSG00000006546	Cryba2	AireEnh	Eye	0.907085
ENSMUSG00000006567	Atp7b	AireEnh	Intestine	0.698335
ENSMUSG00000006570	Defb2	TRGs
ENSMUSG00000006574	Slc4a1	AireEnh	Erythroid	0.565395
ENSMUSG00000006575	Rundc3a	TRGs	Brain	0.611383
ENSMUSG00000006576	Slc4a3	Other	Lymphoid	0.44181
ENSMUSG00000006585	Cdt1	Other	Erythroid	0.30645
ENSMUSG00000006586	Runx1t1	Other	Brain	0.569973
ENSMUSG00000006587	Snai3	Other	Lymphoid	0.585202
ENSMUSG00000006589	Aprt	Other	Intestine	0.166398
ENSMUSG00000006599	Gtf2h1	Other	Male_reproductive	0.292436
ENSMUSG00000006611	Hfe	Other	Myeloid	0.449692
ENSMUSG00000006641	Slc5a6	TRGs	Female_reproductive	0.540211
ENSMUSG00000006642	Tcf23	AireEnh	Female_reproductive	0.901262
ENSMUSG00000006649	Nphs1	AireEnh	Kidney	0.892515
ENSMUSG00000006651	Aplp1	TRGs	Brain	0.57239
ENSMUSG00000006673	Qrich1	Other	Male_reproductive	0.238441
ENSMUSG00000006675	P4htm	Other	Brain	0.564268
ENSMUSG00000006676	Usp19	Other	PNS	0.244841
ENSMUSG00000006678	Pola1	Other	Lymphoid	0.25902
ENSMUSG00000006699	Cdc42	Other	Myeloid	0.202479
ENSMUSG00000006705	Pknox1	Other	Male_reproductive	0.326714
ENSMUSG00000006711	D130043K22Rik	TRGs	Brain	0.757569
ENSMUSG00000006715	Gmnn	Other	Myeloid	0.271635
ENSMUSG00000006717	Acot13	Other	Heart	0.274668
ENSMUSG00000006720	Zfp184	TRGs	PNS	0.460172
ENSMUSG00000006724	Cyp27b1	AireEnh	Kidney	0.978102
ENSMUSG00000006728	Cdk4	Other
ENSMUSG00000006731	B4galnt1	Other	Intestine	0.318325
ENSMUSG00000006732	Mettl1	Other	Lymphoid	0.253045
ENSMUSG00000006736	Tspan31	Other	Liver	0.257229
ENSMUSG00000006740	Kif5b	Other	Myeloid	0.331469
ENSMUSG00000006763	Saal1	Other	PNS	0.200131
ENSMUSG00000006764	Tph2	AireEnh	Brain	0.99288
ENSMUSG00000006777	Krt23	AireEnh	Skin	0.496348
ENSMUSG00000006782	Cnp	Other	PNS	0.399044
ENSMUSG00000006784	Ttc25	TRGs	Male_reproductive	0.784428
ENSMUSG00000006800	Sulf2	Other	Brain	0.33806
ENSMUSG00000006818	Sod2	Other	Myeloid	0.33536
ENSMUSG00000006850	Tmco6	TRGs	Lymphoid	0.314798
ENSMUSG00000006906	Stambp	Housekeeping	Myeloid	0.344957
ENSMUSG00000006920	Ezh1	Other	Myeloid	0.258815
ENSMUSG00000006930	Hap1	TRGs	Spinal_cord	0.599185
ENSMUSG00000006931	P3h4		Brain	0.236663
ENSMUSG00000006932	Ctnnb1	Other	Liver	0.130242
ENSMUSG00000006941	Eif1b	Other	Brain	0.276239
ENSMUSG00000006948	Klk4	AireEnh	Female_reproductive	0.864113
ENSMUSG00000006958	Chrd	AireEnh	Liver	0.563826
ENSMUSG00000006998	Psmd2	Housekeeping	Male_reproductive	0.207011
ENSMUSG00000007021	Syngr3	TRGs	Brain	0.739102
ENSMUSG00000007029	Vars	Other	Male_reproductive	0.404753
ENSMUSG00000007030	Vwa7	Other	Lymphoid	0.615417
ENSMUSG00000007033	Hspa1l	TRGs	Male_reproductive	0.92869
ENSMUSG00000007034	Slc44a4	TRGs	Intestine	0.666728
ENSMUSG00000007035	Msh5	AireEnh	Liver	0.459223
ENSMUSG00000007036	Abhd16a	Other	Myeloid	0.29294
ENSMUSG00000007038	Neu1	Other	Intestine	0.339808
ENSMUSG00000007039	Ddah2	Other	Brain	0.255585
ENSMUSG00000007041	Clic1	Other	Myeloid	0.186629
ENSMUSG00000007050	Lsm2	TRGs	Male_reproductive	0.253662
ENSMUSG00000007080	Pole	Other	Brain	0.289383
ENSMUSG00000007097	Atp1a2	Other	Skeleton	0.415417
ENSMUSG00000007107	Atp1a4	TRGs	Male_reproductive	0.990687
ENSMUSG00000007122	Casq1	TRGs	Skeleton	0.669173
ENSMUSG00000007207	Stx1a	TRGs	Brain	0.559747
ENSMUSG00000007209	Ceacam9	AireDep	Female_reproductive	0.970398
ENSMUSG00000007216	Zfp775	Other	PNS	0.497793
ENSMUSG00000007279	Scube2	TRGs	Lung	0.729429
ENSMUSG00000007338	Mrpl49	Housekeeping	Erythroid	0.140921
ENSMUSG00000007379	Dennd2c	TRGs	Female_reproductive	0.415278
ENSMUSG00000007411	Mark3	Housekeeping	Lymphoid	0.19243
ENSMUSG00000007415	Gatad1	Other	Male_reproductive	0.226371
ENSMUSG00000007440	Pcdha11
ENSMUSG00000007457	2310003L06Rik	AireDep
ENSMUSG00000007458	M6pr	Other	Myeloid	0.370108
ENSMUSG00000007476	Lrrc8a	Other	Liver	0.338407
ENSMUSG00000007480	Mc5r	TRGs	Eye	0.705871
ENSMUSG00000007564	Ppp2r1a	Other	Brain	0.131416
ENSMUSG00000007570	Fance	Other
ENSMUSG00000007589	Tinf2	Other	Lymphoid	0.522957
ENSMUSG00000007591	Tssk4	TRGs	Male_reproductive	0.995032
ENSMUSG00000007594	Hapln4	AireEnh	Spinal_cord	0.740659
ENSMUSG00000007603	Dus3l	Other	PNS	0.290468
ENSMUSG00000007610	Gtpbp3	Other	Brain	0.378578
ENSMUSG00000007613	Tgfbr1	Other	Myeloid	0.357824
ENSMUSG00000007617	Homer1	TRGs	Brain	0.418109
ENSMUSG00000007646	Rad51c	Other	Lymphoid	0.484262
ENSMUSG00000007653	Gabrb2	AireEnh	Brain	0.809408
ENSMUSG00000007655	Cav1	AireEnh	Artery	0.308112
ENSMUSG00000007656	Arpp19	Other	Myeloid	0.268228
ENSMUSG00000007659	Bcl2l1	Other	Myeloid	0.473304
ENSMUSG00000007670	Khsrp	Other	Liver	0.155589
ENSMUSG00000007682	Dio2	AireEnh	Myeloid	0.816111
ENSMUSG00000007721	Ccdc124	Other	Spinal_cord	0.169196
ENSMUSG00000007739	Cct4	Housekeeping	Male_reproductive	0.145204
ENSMUSG00000007777	0610009B22Rik	Other	Myeloid	0.2489
ENSMUSG00000007783	Cpt1c	Other	Brain	0.514431
ENSMUSG00000007805	Twist2	AireDep	Skin	0.489925
ENSMUSG00000007812	Zfp655	Other	Lymphoid	0.272991
ENSMUSG00000007815	Rhoa	Housekeeping	Myeloid	0.739565
ENSMUSG00000007817	Zmiz1	Other	Lymphoid	0.261577
ENSMUSG00000007827	Ankrd26	Other	Brain	0.445939
ENSMUSG00000007833	Aldh16a1	Other	Intestine	0.405698
ENSMUSG00000007836	Hnrnpa0	Other	Erythroid	0.203141
ENSMUSG00000007837	Prrg2	Other	Liver	0.305143
ENSMUSG00000007850	Hnrnph1	Other	Lymphoid	0.207967
ENSMUSG00000007867	Ift43	Other	Male_reproductive	0.38173
ENSMUSG00000007872	Id3	Other	Brain	0.29266
ENSMUSG00000007877	Tcap	AireEnh	Skeleton	0.696819
ENSMUSG00000007880	Arid1a	Other	Lymphoid	0.239129
ENSMUSG00000007888	Crlf1	AireEnh	PNS	0.525942
ENSMUSG00000007891	Ctsd	Other	Myeloid	0.374154
ENSMUSG00000007892	Rplp1	Housekeeping	Brain	0.563364
ENSMUSG00000007907	Cabs1	AireEnh	Male_reproductive	0.998659
ENSMUSG00000007908	Hmgcll1	TRGs	Brain	0.478314
ENSMUSG00000007944	Ttc9b	AireEnh	Brain	0.817569
ENSMUSG00000007946	Phox2a	TRGs	PNS	0.749282
ENSMUSG00000007950	Abhd8	Other	Male_reproductive	0.348832
ENSMUSG00000007987	Ift22		Male_reproductive	0.390464
ENSMUSG00000007989	Fzd3	TRGs	Brain	0.433701
ENSMUSG00000008028	1700008O03Rik	TRGs	Male_reproductive	0.886955
ENSMUSG00000008035	Mid1ip1	Other	Eye	0.437948
ENSMUSG00000008036	Ap2s1	Other	Myeloid	0.162048
ENSMUSG00000008090	Fgfrl1	Other	Erythroid	0.414372
ENSMUSG00000008129	4930432K21Rik	TRGs	Male_reproductive	0.887129
ENSMUSG00000008136	Fhl2	AireEnh	Heart	0.521828
ENSMUSG00000008140	Emc10	Other	Brain	0.207487
ENSMUSG00000008153	Clstn3	AireEnh	Brain	0.596593
ENSMUSG00000008167	Fbxw9	Other	Brain	0.294495
ENSMUSG00000008193	Spib	TRGs	Intestine	0.677031
ENSMUSG00000008200	Fnbp4	Other	Lymphoid	0.234176
ENSMUSG00000008206	Cers4	Other	Eye	0.615973
ENSMUSG00000008226	Scrn3	Other	Liver	0.424891
ENSMUSG00000008301	Phax	Other	Myeloid	0.22178
ENSMUSG00000008305	Tle1	Other	Lymphoid	0.326279
ENSMUSG00000008307	1700109H08Rik	TRGs	Male_reproductive	0.968231
ENSMUSG00000008318	Relt	TRGs	Liver	0.547502
ENSMUSG00000008333	Snrpb2	Housekeeping	Myeloid	0.334756
ENSMUSG00000008348	Ubc	Housekeeping	Myeloid	0.164191
ENSMUSG00000008373	Prpf31	Other	Myeloid	0.442325
ENSMUSG00000008384	Sertad1	Other	Lymphoid	0.299543
ENSMUSG00000008393	Carhsp1	Other	Liver	0.729993
ENSMUSG00000008398	Elk3	Other	Liver	0.305988
ENSMUSG00000008429	Herpud2	Other	Male_reproductive	0.250655
ENSMUSG00000008435	Rdh13	Other	Brain	0.438477
ENSMUSG00000008438	Adam21	TRGs
ENSMUSG00000008450	Nutf2	Other
ENSMUSG00000008461	Fut1	Other	Peripheral_gland	0.652259
ENSMUSG00000008475	Arpc5	Other	Myeloid	0.279264
ENSMUSG00000008482	Rnf151	TRGs	Male_reproductive	0.998245
ENSMUSG00000008489	Elavl2	TRGs	Brain	0.634764
ENSMUSG00000008496	Pou2f2	AireEnh	Lymphoid	0.67616
ENSMUSG00000008540	Mgst1	Other	Liver	0.450883
ENSMUSG00000008575	Nfib	Other	Brain	0.335433
ENSMUSG00000008590	Htr3b	AireDep
ENSMUSG00000008601	Rab25	Other	Skeletal_muscle	0.406086
ENSMUSG00000008604	Ubqln4	Other	PNS	0.347489
ENSMUSG00000008658	Rbfox1	TRGs	Brain	0.655706
ENSMUSG00000008668	Rps18	Housekeeping
ENSMUSG00000008682	Rpl10	Other
ENSMUSG00000008683	Rps15a	Housekeeping	Lymphoid	0.463966
ENSMUSG00000008690	Ncaph2	Other	Erythroid	0.204813
ENSMUSG00000008730	Hipk1	Other	Myeloid	0.261391
ENSMUSG00000008734	Gprc5b	Other	Spinal_cord	0.355185
ENSMUSG00000008763	Man1a2	Other	Lymphoid	0.215931
ENSMUSG00000008789	Ceacam5	AireEnh	Female_reproductive	0.983779
ENSMUSG00000008813	Tppp2	Other	Male_reproductive	0.985164
ENSMUSG00000008822	Acyp1	Other	Male_reproductive	0.467239
ENSMUSG00000008843	Cldn13	TRGs	Erythroid	0.682439
ENSMUSG00000008845	Cd163	AireEnh	Artery	0.419491
ENSMUSG00000008855	Hdac5	Other	Liver	0.250224
ENSMUSG00000008859	Rala	Other	Myeloid	0.239658
ENSMUSG00000008874	Clec3a	AireDep	Skeleton	0.811695
ENSMUSG00000008892	Vdac3	Other	Myeloid	0.210616
ENSMUSG00000008932	Slc1a7	TRGs	Eye	0.943088
ENSMUSG00000008958	Vps72	Other	Brain	0.127827
ENSMUSG00000008976	Gabpa	Other	Brain	0.289383
ENSMUSG00000008999	Bmp7	TRGs	Lymphoid	0.47908
ENSMUSG00000009013	Dynll1	Other	Male_reproductive	0.239179
ENSMUSG00000009030	Pdcl	Other	Myeloid	0.316511
ENSMUSG00000009035	Tmem184b	Other	Myeloid	0.280618
ENSMUSG00000009047	Gm5965	Other
ENSMUSG00000009070	Rsph14		Male_reproductive	0.822033
ENSMUSG00000009073	Nf2	Other	Liver	0.153173
ENSMUSG00000009075	Cabp7	TRGs	Brain	0.873845
ENSMUSG00000009076	Zmat5	Other	Brain	0.243714
ENSMUSG00000009079	Ewsr1	Other	Liver	0.250928
ENSMUSG00000009090	Ap1b1	Other	Liver	0.206248
ENSMUSG00000009092	Derl3	TRGs	Peripheral_gland	0.639875
ENSMUSG00000009093	Gstt4	AireEnh	Male_reproductive	1
ENSMUSG00000009097	Tbx1	TRGs	Skeletal_muscle	0.58079
ENSMUSG00000009108	Gnat2	AireEnh	Eye	0.955251
ENSMUSG00000009112	Bcl2l13	Other	Brain	0.275633
ENSMUSG00000009114	2610028H24Rik	Other	Trachea	0.852314
ENSMUSG00000009115	Spatc1l	TRGs	Male_reproductive	0.998362
ENSMUSG00000009145	Dqx1	TRGs	Intestine	0.728767
ENSMUSG00000009185	Ccl8	AireEnh
ENSMUSG00000009207	Lnp	Other	Eye	0.222611
ENSMUSG00000009210	Prr29		Trachea	0.754003
ENSMUSG00000009214	Tmem8c	AireEnh	Skeleton	0.678534
ENSMUSG00000009216	Fam163b	TRGs	Brain	0.859853
ENSMUSG00000009246	Trpm5	Other	Female_reproductive	0.579018
ENSMUSG00000009248	Ascl2	AireEnh	Female_reproductive	0.771905
ENSMUSG00000009281	Rarres2	Other	Liver	0.535515
ENSMUSG00000009291	Pttg1ip	Other	Stomach	0.21851
ENSMUSG00000009292	Trpm2	TRGs	Myeloid	0.711601
ENSMUSG00000009293	Ube2g2	Other	Lymphoid	0.255746
ENSMUSG00000009350	Mpo	AireEnh	Myeloid	0.780015
ENSMUSG00000009356	Lpo	TRGs	Peripheral_gland	0.907817
ENSMUSG00000009376	Met	Other	PNS	0.450242
ENSMUSG00000009378	Slc16a12	Other	Liver	0.625893
ENSMUSG00000009394	Syn2	TRGs	Brain	0.673655
ENSMUSG00000009406	Elk1	Other	Brain	0.256121
ENSMUSG00000009418	Nav1	Other	Brain	0.521435
ENSMUSG00000009470	Tnpo1	Other	Erythroid	0.256055
ENSMUSG00000009471	Myod1	AireEnh	Skeleton	0.744232
ENSMUSG00000009487	Otog	AireEnh	PNS	0.950744
ENSMUSG00000009535	Rnmt	Other	Myeloid	0.384744
ENSMUSG00000009545	Kcnq1	Other	Intestine	0.58635
ENSMUSG00000009549	Srp14	Housekeeping
ENSMUSG00000009551	6330409D20Rik	Other
ENSMUSG00000009555	Cdk9	Other	Lymphoid	0.225388
ENSMUSG00000009563	Tor2a	Other	Liver	0.233434
ENSMUSG00000009566	Fpgs	TRGs	Liver	0.48245
ENSMUSG00000009569	Mkl2	Other	Brain	0.265472
ENSMUSG00000009575	Cbx5	Other	Liver	0.221404
ENSMUSG00000009580	Odam	AireEnh	Male_reproductive	0.882621
ENSMUSG00000009585	Apobec3	Other	Lymphoid	0.455137
ENSMUSG00000009588	St6galnac1	TRGs
ENSMUSG00000009596	Taf7l	AireEnh	Female_reproductive	0.947741
ENSMUSG00000009614	Sardh	TRGs	Liver	0.605664
ENSMUSG00000009621	Vav2	Other	Liver	0.39141
ENSMUSG00000009628	Tex15	TRGs	Male_reproductive	0.740028
ENSMUSG00000009630	Ppp2cb	Other	Lymphoid	0.222508
ENSMUSG00000009633	G0s2	AireEnh	Peripheral_gland	0.50525
ENSMUSG00000009640	Dmap1	Other	Myeloid	0.221792
ENSMUSG00000009646	Pla2g12b	AireEnh	Intestine	0.812425
ENSMUSG00000009647	Mcu	Other	Intestine	0.290987
ENSMUSG00000009654	Oit3	AireEnh	Liver	0.824237
ENSMUSG00000009670	Tex11	TRGs	Male_reproductive	0.921207
ENSMUSG00000009681	Bcr	TRGs	Liver	0.283041
ENSMUSG00000009687	Fxyd5	Other	Lymphoid	0.377545
ENSMUSG00000009731	Kcnd1	TRGs
ENSMUSG00000009733	Tfcp2	Other	Brain	0.327843
ENSMUSG00000009734	Pou6f2	Other
ENSMUSG00000009739	Pou6f1	TRGs	Lymphoid	0.568351
ENSMUSG00000009741	Ubp1	Other	Intestine	0.249951
ENSMUSG00000009772	Nuak2	Other	Brain	0.390828
ENSMUSG00000009828	Ick	Other	Erythroid	0.317061
ENSMUSG00000009863	Sdhb	Other	Heart	0.199993
ENSMUSG00000009876	Cox4i2	AireEnh	Lung	0.485042
ENSMUSG00000009894	Snap47	Other	Brain	0.290686
ENSMUSG00000009900	Wnt3a	AireEnh	Lung	0.894787
ENSMUSG00000009905	Kdsr	Other	Eye	0.356658
ENSMUSG00000009907	Vps4b	Other	Myeloid	0.324941
ENSMUSG00000009927	Rps25	Housekeeping
ENSMUSG00000009941	Nxf2	TRGs	Male_reproductive	0.970216
ENSMUSG00000009995	Taz	Other	Myeloid	0.15685
ENSMUSG00000010021	Kif19a	Other	PNS	0.616865
ENSMUSG00000010025	Aldh3a2	Other	Liver	0.413212
ENSMUSG00000010044	Zmynd10	AireEnh	Male_reproductive	0.817262
ENSMUSG00000010045	Tmem115	Other	Lymphoid	0.260747
ENSMUSG00000010047	Hyal2	Other	Trachea	0.157925
ENSMUSG00000010048	Ifrd2	Other	Erythroid	0.306713
ENSMUSG00000010051	Hyal1	Other	Liver	0.380268
ENSMUSG00000010054	Tusc2	Other	Liver	0.196845
ENSMUSG00000010057	Nprl2	Other	Lymphoid	0.212389
ENSMUSG00000010064	Slc38a3	AireEnh	Liver	0.581616
ENSMUSG00000010066	Cacna2d2	AireEnh	Brain	0.709279
ENSMUSG00000010067	Rassf1	Other	PNS	0.272029
ENSMUSG00000010080	Epn3	TRGs	Female_reproductive	0.450578
ENSMUSG00000010086	Rnf112	AireEnh	Brain	0.803331
ENSMUSG00000010095	Slc3a2	Other	Myeloid	0.259755
ENSMUSG00000010097	Nxf1	Other	Lymphoid	0.297759
ENSMUSG00000010110	Stx5a	Other	Lymphoid	0.212188
ENSMUSG00000010122	Slc47a1	AireEnh	Kidney	0.70565
ENSMUSG00000010136	Pifo	TRGs	Male_reproductive	0.783408
ENSMUSG00000010142	Tnfrsf13b	AireEnh	Erythroid	0.61178
ENSMUSG00000010154	Spire2	Other	Intestine	0.515094
ENSMUSG00000010175	Prox1	TRGs	Liver	0.610895
ENSMUSG00000010205	Raver1	Other	Brain	0.66664
ENSMUSG00000010277	2610507B11Rik	Other	Male_reproductive	0.171641
ENSMUSG00000010290	AI597479	Other	Erythroid	0.398135
ENSMUSG00000010307	Tmem86a	AireEnh	Eye	0.394526
ENSMUSG00000010311	Optc	TRGs	Eye	0.877183
ENSMUSG00000010342	Tex14	TRGs	Male_reproductive	0.876773
ENSMUSG00000010358	Ifi35	Other	Myeloid	0.361466
ENSMUSG00000010362	Rdm1	Other	Brain	0.221166
ENSMUSG00000010376	Nedd8	Other	Myeloid	0.205039
ENSMUSG00000010392	Gosr1	Housekeeping	Myeloid	0.257403
ENSMUSG00000010406	Mrpl52	Other	Liver	0.212449
ENSMUSG00000010435	Spaca7	AireDep	Male_reproductive	0.950052
ENSMUSG00000010453	Kansl3	Other	Lymphoid	0.203576
ENSMUSG00000010461	Eya4	TRGs	Liver	0.478324
ENSMUSG00000010476	Ebf3	AireEnh	Brain	0.572723
ENSMUSG00000010492	Uckl1os
ENSMUSG00000010505	Myt1	AireEnh	Brain	0.813131
ENSMUSG00000010517	Faf1	Other	Brain	0.229572
ENSMUSG00000010529	Gm266	TRGs	PNS	0.521598
ENSMUSG00000010538	Tsacc	TRGs	Male_reproductive	0.620663
ENSMUSG00000010554	Mettl16	Other	Erythroid	0.328219
ENSMUSG00000010592	Dazl	TRGs	Male_reproductive	0.947741
ENSMUSG00000010601	Apol7a	AireEnh	Liver	0.889526
ENSMUSG00000010607	Pigyl	Other	Liver	0.289657
ENSMUSG00000010608	Rbm25	Other	Myeloid	0.213165
ENSMUSG00000010609	Psen2	Other	Liver	0.568211
ENSMUSG00000010651	Acaa1b	AireEnh	Liver	0.727742
ENSMUSG00000010660	Plcd1	Other	Skeletal_muscle	0.275514
ENSMUSG00000010663	Fads1	Other	Peripheral_gland	0.366618
ENSMUSG00000010721	Lmbr1	Other	Female_reproductive	0.161151
ENSMUSG00000010751	Tnfrsf22	TRGs	Trachea	0.299053
ENSMUSG00000010755	Cars	Other	Lymphoid	0.315779
ENSMUSG00000010760	Phlda2	AireEnh	Female_reproductive	0.628842
ENSMUSG00000010796	Asz1	AireEnh	Male_reproductive	0.972738
ENSMUSG00000010797	Wnt2	TRGs	Liver	0.783474
ENSMUSG00000010803	Gabra1	AireEnh	Brain	0.815645
ENSMUSG00000010825	Grid2ip	AireEnh	Brain	0.815131
ENSMUSG00000010830	Kdelr3	Other	Skin	0.293064
ENSMUSG00000010841	1700006E09Rik	TRGs	Male_reproductive	0.996142
ENSMUSG00000010911	Apip	Other	Myeloid	0.233999
ENSMUSG00000010914	Pdhx	Other	Liver	0.259019
ENSMUSG00000010936	Vac14	Other	Brain	0.239283
ENSMUSG00000011008	Mcoln2	AireEnh	Myeloid	0.786906
ENSMUSG00000011034	Slc5a1	AireEnh	Intestine	0.775589
ENSMUSG00000011052	1700049J03Rik
ENSMUSG00000011096	Akt1s1	Other	Artery	0.229159
ENSMUSG00000011114	Tbrg1	Other	Myeloid	0.200235
ENSMUSG00000011118	Panx3	AireEnh	Skeleton	0.825079
ENSMUSG00000011148	Adssl1	AireEnh	Skeleton	0.489176
ENSMUSG00000011154	Cfap161		Male_reproductive	0.880519
ENSMUSG00000011158	Brf1	Other	Brain	0.262634
ENSMUSG00000011171	Vipr2	AireEnh	Brain	0.566694
ENSMUSG00000011179	Odc1	Other	Male_reproductive	0.544951
ENSMUSG00000011254	Thg1l	TRGs	Myeloid	0.261608
ENSMUSG00000011256	Adam19	Other	Female_reproductive	0.327659
ENSMUSG00000011257	Pabpc4	Other
ENSMUSG00000011263	Exoc3l2	AireEnh	Male_reproductive	0.960002
ENSMUSG00000011267	Zfp296	TRGs	Lymphoid	0.536886
ENSMUSG00000011305	Plin5	AireEnh	Liver	0.744146
ENSMUSG00000011306	Sugp1	Other	Male_reproductive	0.337539
ENSMUSG00000011349	Dmrtc2	TRGs	Male_reproductive	0.972282
ENSMUSG00000011382	Dhdh	Other	Artery	0.489843
ENSMUSG00000011427	Zfp790	Other	Liver	0.339931
ENSMUSG00000011463	Cpb1	AireEnh	Peripheral_gland	0.821019
ENSMUSG00000011486	Slc25a41	AireEnh	Male_reproductive	1
ENSMUSG00000011589	Fsd1	AireEnh	PNS	0.688235
ENSMUSG00000011632	Pinlyp	TRGs	Skin	0.815151
ENSMUSG00000011658	Fuz	Other	Brain	0.396801
ENSMUSG00000011751	Sptbn4	AireEnh	Brain	0.858776
ENSMUSG00000011752	Pgam1	Housekeeping	Myeloid	0.415557
ENSMUSG00000011831	Evi5	Other	Liver	0.468285
ENSMUSG00000011832	Evi5l	TRGs	Male_reproductive	0.363407
ENSMUSG00000011837	Snapc2	Other	Brain	0.167757
ENSMUSG00000011877	Git1	TRGs	Male_reproductive	0.603249
ENSMUSG00000011884	Gltp	Other	Skeleton	0.27587
ENSMUSG00000011958	Bnip2	Other	Myeloid	0.269429
ENSMUSG00000011960	Ccnt1	Other	Lymphoid	0.213811
ENSMUSG00000012017	Scarf2	Other	Liver	0.484506
ENSMUSG00000012042	4930579F01Rik	AireDep	Male_reproductive	0.994774
ENSMUSG00000012076	Brms1l	Other	Brain	0.346154
ENSMUSG00000012114	Med15	Other	Myeloid	0.208417
ENSMUSG00000012117	Dhdds	Other	Myeloid	0.263265
ENSMUSG00000012123	Aim1l	AireEnh	Intestine	0.748607
ENSMUSG00000012126	Ubxn11	TRGs	Male_reproductive	0.684224
ENSMUSG00000012187	Mogat1	TRGs	Eye	0.855638
ENSMUSG00000012211	Tex22	TRGs	Male_reproductive	0.848538
ENSMUSG00000012282	Wnt8a	Other	Skin	0.916529
ENSMUSG00000012296	Tjap1	Housekeeping	Lymphoid	0.21752
ENSMUSG00000012350	Ehf	Other	Peripheral_gland	0.532992
ENSMUSG00000012396	Nanog	AireEnh
ENSMUSG00000012405	Rpl15	Housekeeping
ENSMUSG00000012422	Tmem167	Other	Fat	0.173548
ENSMUSG00000012428	Steap4	Other	Liver	0.567427
ENSMUSG00000012429	Mplkip	Other
ENSMUSG00000012443	Kif11	TRGs		0.296333
ENSMUSG00000012483	Rpa3	Other	Erythroid	0.175931
ENSMUSG00000012519	Mlkl	TRGs	Myeloid	0.573363
ENSMUSG00000012520	Phox2b	AireDep	PNS	0.845164
ENSMUSG00000012535	Tnpo3	Housekeeping	Lymphoid	0.213616
ENSMUSG00000012609	Ttll5	TRGs	Male_reproductive	0.530336
ENSMUSG00000012640	Zfp715	Other	Liver	0.348565
ENSMUSG00000012705	Retn	Other	Peripheral_gland	0.568966
ENSMUSG00000012777	Acpt	AireEnh
ENSMUSG00000012819	Cdh23	TRGs	Male_reproductive	0.662966
ENSMUSG00000012848	Rps5	Housekeeping	Erythroid	0.125001
ENSMUSG00000012889	Podnl1	AireEnh	Lymphoid	0.813965
ENSMUSG00000013033	Adgrl1		Spinal_cord	0.316455
ENSMUSG00000013076	Amotl1	Other	Liver	0.280829
ENSMUSG00000013083	2200002J24Rik	TRGs	Male_reproductive	0.870144
ENSMUSG00000013089	Etv5	Other	Male_reproductive	0.293933
ENSMUSG00000013091	Tmem190	TRGs	Male_reproductive	0.994706
ENSMUSG00000013150	Gfod2	Other	Brain	0.302245
ENSMUSG00000013155	Enkd1	TRGs	Male_reproductive	0.555448
ENSMUSG00000013158	4933405L10Rik	TRGs	Male_reproductive	0.9324
ENSMUSG00000013160	Atp6v0d1	Other	Brain	0.162322
ENSMUSG00000013236	Ptprs	Other	Brain	0.269269
ENSMUSG00000013275	Slc41a1	Other	Lymphoid	0.507297
ENSMUSG00000013338	Fer1l4	AireEnh	Urinary	0.881464
ENSMUSG00000013353	4931406B18Rik	AireEnh	Male_reproductive	0.998486
ENSMUSG00000013367	Iglon5	AireEnh	Brain	0.602939
ENSMUSG00000013415	Igf2bp1	Other	Erythroid	0.348332
ENSMUSG00000013418	B4galnt2	TRGs	Intestine	0.749941
ENSMUSG00000013419	Zfp651	TRGs	PNS	0.327024
ENSMUSG00000013465	Nelfb	Other	Lymphoid	0.206807
ENSMUSG00000013483	Card14	AireEnh	Peripheral_gland	0.67189
ENSMUSG00000013495	Tmem175	Other	Male_reproductive	0.242353
ENSMUSG00000013523	Bcas1	AireEnh	Brain	0.710762
ENSMUSG00000013539	Tango2	Other		0.442167
ENSMUSG00000013562	4833413E03Rik	Other
ENSMUSG00000013584	Aldh1a2	AireEnh	Female_reproductive	0.384097
ENSMUSG00000013593	Ndufs2	Other	Heart	0.192139
ENSMUSG00000013611	Snx31	TRGs	Urinary	0.655566
ENSMUSG00000013622	Atraid	Other	Liver	0.168861
ENSMUSG00000013629	Cad	TRGs	Brain	0.306287
ENSMUSG00000013643	Lypd8	TRGs	Cecum	0.731473
ENSMUSG00000013646	Sh3bp5l	Other	PNS	0.368817
ENSMUSG00000013653	1810065E05Rik	AireEnh	Stomach	0.903501
ENSMUSG00000013662	Atad1	Other	Myeloid	0.262974
ENSMUSG00000013663	Pten	Other	Myeloid	0.174397
ENSMUSG00000013668	4933402N03Rik	TRGs	Male_reproductive	1
ENSMUSG00000013698	Pea15a	Other	Brain	0.421457
ENSMUSG00000013701	Timm23	Other	Erythroid	0.346341
ENSMUSG00000013707	Tnfaip8l2	Other	Myeloid	0.62973
ENSMUSG00000013736	Trnt1	Other	Myeloid	0.332645
ENSMUSG00000013766	Ly6g6e	AireEnh	Stomach	0.605613
ENSMUSG00000013787	Ehmt2	Other	Brain	0.370914
ENSMUSG00000013822	Elof1	Other	Male_reproductive	0.324002
ENSMUSG00000013833	Med16	Other	Male_reproductive	0.370326
ENSMUSG00000013846	St3gal1	TRGs	Myeloid	0.379338
ENSMUSG00000013858	Tmem259	Other	Liver	0.294876
ENSMUSG00000013878	Rnf170	Other	Liver	0.40036
ENSMUSG00000013921	Clip3	AireEnh	Brain	0.402522
ENSMUSG00000013928	Thap8	Other
ENSMUSG00000013936	Myl2	AireEnh	Heart	0.753474
ENSMUSG00000013973	Dedd	Housekeeping	Myeloid	0.459273
ENSMUSG00000013974	Mcemp1		Myeloid	0.779968
ENSMUSG00000013997	Nit1	Housekeeping	Liver	0.28401
ENSMUSG00000014030	Pax5	TRGs	Lymphoid	0.74569
ENSMUSG00000014039	Prdm15	Other	Brain	0.330844
ENSMUSG00000014074	Rnf168	Other	Stomach	0.520636
ENSMUSG00000014075	Tctex1d2	TRGs	Myeloid	0.437543
ENSMUSG00000014077	Chp1	Other	Liver	0.741785
ENSMUSG00000014104	Sval2	TRGs	Peripheral_gland	0.915983
ENSMUSG00000014158	Trpv4	AireEnh	Trachea	0.551019
ENSMUSG00000014164	Klhl3	Other	Lymphoid	0.497214
ENSMUSG00000014177	Tvp23b	Other
ENSMUSG00000014195	Dnajc7	Other	Myeloid	0.261776
ENSMUSG00000014198	Zfp385c	Other	Brain	0.865369
ENSMUSG00000014226	Cacybp	Other	Myeloid	0.236897
ENSMUSG00000014232	Cluap1	Other	Brain	0.31526
ENSMUSG00000014243	Zswim7	TRGs	Male_reproductive	0.331324
ENSMUSG00000014245	Pigl	Other	Lymphoid	0.370195
ENSMUSG00000014294	Ndufa2	Other	Myeloid	0.148311
ENSMUSG00000014301	Pam16	Other	Male_reproductive	0.384066
ENSMUSG00000014303	Glis2	Other	Kidney	0.329659
ENSMUSG00000014313	Cox6c	Other
ENSMUSG00000014329	Bicc1	AireEnh	Liver	0.433911
ENSMUSG00000014349	Ube2z	Other	Lymphoid	0.26197
ENSMUSG00000014351	Gip	AireEnh	Intestine	0.923483
ENSMUSG00000014353	Tmem87b	Other	Lymphoid	0.269845
ENSMUSG00000014355	Anapc1	Other	Erythroid	0.228965
ENSMUSG00000014361	Mertk	AireEnh	Myeloid	0.522807
ENSMUSG00000014402	Tsg101	Housekeeping	Brain	0.157774
ENSMUSG00000014418	Hps5	Other	PNS	0.341279
ENSMUSG00000014426	Map3k4	Other	Brain	0.218832
ENSMUSG00000014444	Piezo1	Other	Myeloid	0.331355
ENSMUSG00000014453	Blk	TRGs	Lymphoid	0.803015
ENSMUSG00000014470	Rnf166	Other	Male_reproductive	0.356069
ENSMUSG00000014496	Ankrd28	Other	Erythroid	0.306121
ENSMUSG00000014498	Ankrd52	Other	Liver	0.250429
ENSMUSG00000014503	Pkd2l2	TRGs	Male_reproductive	0.569012
ENSMUSG00000014504	Srp19	Housekeeping	Myeloid	0.206441
ENSMUSG00000014529	Tmbim7		Male_reproductive	0.988403
ENSMUSG00000014542	Clec4f	AireDep	Liver	0.918911
ENSMUSG00000014543	Klra17	TRGs	Myeloid	0.886232
ENSMUSG00000014547	Wdfy2	Other	Myeloid	0.373795
ENSMUSG00000014550	Rbsn		Brain	0.167467
ENSMUSG00000014551	Mrps25	Other	Myeloid	0.173567
ENSMUSG00000014554	Dguok	Other	PNS	0.268804
ENSMUSG00000014592	Camta1	Other	Brain	0.260915
ENSMUSG00000014599	Csf1	TRGs	Female_reproductive	0.488533
ENSMUSG00000014601	Strip1	Other	Lymphoid	0.224193
ENSMUSG00000014602	Kif1a	TRGs	Brain	0.573059
ENSMUSG00000014603	Alx3	TRGs	Eye	0.74914
ENSMUSG00000014606	Slc25a11	Other	Myeloid	0.189406
ENSMUSG00000014609	Chrne	TRGs	Male_reproductive	0.849198
ENSMUSG00000014633	Cmc2	Other	Lymphoid	0.199024
ENSMUSG00000014668	Chfr	Other	PNS	0.275767
ENSMUSG00000014686	Ceacam16	Other	Myeloid	0.894009
ENSMUSG00000014704	Hoxa2	Other	Liver	0.617388
ENSMUSG00000014725	Adam28	TRGs	Male_reproductive	0.824481
ENSMUSG00000014747	Ankrd53	Other	Male_reproductive	0.993439
ENSMUSG00000014748	Tex261	Housekeeping	Liver	0.221603
ENSMUSG00000014763	Fam120b	Other	Male_reproductive	0.162084
ENSMUSG00000014767	Tbp	TRGs	Male_reproductive	0.365182
ENSMUSG00000014769	Psmb1	Housekeeping	Myeloid	0.165706
ENSMUSG00000014771	Pdcd2	Other	Lymphoid	0.154802
ENSMUSG00000014773	Dll1	TRGs	Liver	0.431153
ENSMUSG00000014776	Nol3	TRGs	Skeletal_muscle	0.433587
ENSMUSG00000014778	Fhod1	Other	Lung	0.398686
ENSMUSG00000014782	Plekhg4	AireEnh	Skeleton	0.812506
ENSMUSG00000014786	Slc9a5	TRGs	Myeloid	0.558709
ENSMUSG00000014791	Elmo3	Other	Intestine	0.434818
ENSMUSG00000014813	Stc1	TRGs	Lymphoid	0.447968
ENSMUSG00000014837	4931428F04Rik	Other	Brain	0.474137
ENSMUSG00000014846	Tppp3	Other	Brain	0.366875
ENSMUSG00000014850	Msh3	Other	Brain	0.281185
ENSMUSG00000014852	Adamts13	Other	Liver	0.855315
ENSMUSG00000014856	Tmem208	Other	Brain	0.168932
ENSMUSG00000014859	E2f4	TRGs	Erythroid	0.277331
ENSMUSG00000014867	Surf4	Other	Intestine	0.253378
ENSMUSG00000014873	Surf2	Other	Lymphoid	0.25822
ENSMUSG00000014905	Dnajb9	Other	Liver	0.278913
ENSMUSG00000014907	Naf1	Other	Lymphoid	0.250267
ENSMUSG00000014932	Yes1	Other	Liver	0.379839
ENSMUSG00000014956	Ppp1cb	Other	Lymphoid	0.147013
ENSMUSG00000014959	Gorasp2	Housekeeping	Male_reproductive	0.260382
ENSMUSG00000014980	Tsen15	Other	Erythroid	0.412611
ENSMUSG00000015001	Oc90	AireDep	PNS	0.935364
ENSMUSG00000015002	Efr3a	Other	Erythroid	0.294974
ENSMUSG00000015013	Trappc2l	Other	Myeloid	0.239386
ENSMUSG00000015016	Acsf3	TRGs	Liver	0.368254
ENSMUSG00000015023	Ddx19a	Other	Liver	0.18444
ENSMUSG00000015027	Galns	TRGs	Female_reproductive	0.374555
ENSMUSG00000015053	Gata2	AireEnh	Peripheral_gland	0.460578
ENSMUSG00000015083	C8g	TRGs	Liver	0.78008
ENSMUSG00000015085	Entpd2	Other	Female_reproductive	0.609791
ENSMUSG00000015087	Rabl6	Other	Lymphoid	0.18902
ENSMUSG00000015090	Ptgds	AireEnh	Brain	0.664824
ENSMUSG00000015092	Edf1	Housekeeping
ENSMUSG00000015093	Clic3	TRGs	Lung	0.587828
ENSMUSG00000015094	Npdc1	Other	PNS	0.22701
ENSMUSG00000015095	Fbxw5	TRGs	Male_reproductive	0.305507
ENSMUSG00000015112	Slc25a13	TRGs	Liver	0.502695
ENSMUSG00000015120	Ube2i	Other	Skin	0.158557
ENSMUSG00000015126	Tsr3	Other	Liver	0.1874
ENSMUSG00000015127	Unkl	Other	Brain	0.330244
ENSMUSG00000015133	Lrrk1	Other	Liver	0.360794
ENSMUSG00000015134	Aldh1a3	TRGs	PNS	0.530498
ENSMUSG00000015143	Actn1	Other	Urinary	0.219128
ENSMUSG00000015149	Sirt2	Other	Brain	0.329799
ENSMUSG00000015165	Hnrnpl	Other	Myeloid	0.142424
ENSMUSG00000015176	Nolc1	Other	Lymphoid	0.314446
ENSMUSG00000015189	Casd1	Other	Erythroid	0.340343
ENSMUSG00000015202	Cnksr3	Other	Liver	0.392009
ENSMUSG00000015214	Mtmr1	Other	Lymphoid	0.279375
ENSMUSG00000015217	Hmgb3	Other	Brain	0.223784
ENSMUSG00000015222	Map2	Other	Brain	0.487494
ENSMUSG00000015224	Cyp2j9	TRGs	PNS	0.58291
ENSMUSG00000015242	Nipsnap3a	TRGs	Male_reproductive	0.988614
ENSMUSG00000015243	Abca1	Other	Myeloid	0.423929
ENSMUSG00000015247	Nipsnap3b	Other	Liver	0.226175
ENSMUSG00000015289	Lage3	Other	Brain	0.221707
ENSMUSG00000015290	Ubl4a		Peripheral_gland	0.0966206
ENSMUSG00000015291	Gdi1	Other	Brain	0.234844
ENSMUSG00000015305	Sash1	Other	Myeloid	0.373026
ENSMUSG00000015312	Gadd45b	Other	Lymphoid	0.454357
ENSMUSG00000015314	Slamf6	TRGs	Lymphoid	0.731991
ENSMUSG00000015316	Slamf1	TRGs	Lymphoid	0.785233
ENSMUSG00000015335	Zdhhc12	TRGs	Male_reproductive	0.350548
ENSMUSG00000015337	Endog	Other	Liver	0.356398
ENSMUSG00000015340	Cybb	TRGs	Myeloid	0.70218
ENSMUSG00000015341	Golga7	Housekeeping	Myeloid	0.19155
ENSMUSG00000015342	Xk	TRGs	Erythroid	0.620208
ENSMUSG00000015354	Pcolce2	TRGs	Lung	0.477585
ENSMUSG00000015355	Cd48	Other	Myeloid	0.547822
ENSMUSG00000015357	Clpx	Other	Liver	0.373097
ENSMUSG00000015363	Trabd	Other	Peripheral_gland	0.298592
ENSMUSG00000015365	Mov10l1	AireEnh	Male_reproductive	0.884557
ENSMUSG00000015377	Dennd6b	TRGs	Brain	0.502847
ENSMUSG00000015396	Cd83	Other	Myeloid	0.622728
ENSMUSG00000015401	Tmem27	AireEnh	Kidney	0.889012
ENSMUSG00000015405	Ace2	AireEnh	Intestine	0.705812
ENSMUSG00000015437	Gzmb	AireEnh	Lymphoid	0.698253
ENSMUSG00000015441	Gzmf	AireDep	Female_reproductive	0.936544
ENSMUSG00000015443	Gzmn	AireDep	Male_reproductive	0.995747
ENSMUSG00000015452	Ager	TRGs	Lung	0.865636
ENSMUSG00000015461	Atf6b	Other	Myeloid	0.355696
ENSMUSG00000015467	Egfl8	TRGs	PNS	0.798628
ENSMUSG00000015468	Notch4	TRGs	Liver	0.504073
ENSMUSG00000015474	Ppt2	Other	Brain	0.197934
ENSMUSG00000015476	Prrt1	TRGs	Brain	0.590602
ENSMUSG00000015478	Rnf5	Other	Liver	0.210763
ENSMUSG00000015484	Fam163a	TRGs	Liver	0.683455
ENSMUSG00000015488	Cacfd1	Other	Liver	0.255019
ENSMUSG00000015501	Hivep2	Other	Lymphoid	0.397678
ENSMUSG00000015519	2310057J18Rik	TRGs	Peripheral_gland	0.88962
ENSMUSG00000015522	Arnt	Other	PNS	0.284737
ENSMUSG00000015533	Itga2	Other	Trachea	0.546137
ENSMUSG00000015536	Mocs2	Other	Liver	0.319575
ENSMUSG00000015542	Nat9	TRGs	Liver	0.372998
ENSMUSG00000015568	Lpl	Other	Heart	0.405772
ENSMUSG00000015575	Atp6v0e	Other	Myeloid	0.254521
ENSMUSG00000015579	Nkx2-5	AireEnh	Heart	0.833769
ENSMUSG00000015597	Zfp318	TRGs	Male_reproductive	0.39922
ENSMUSG00000015599	Ttbk1	AireEnh	Male_reproductive	0.77066
ENSMUSG00000015605	Srf	Other	Heart	0.250617
ENSMUSG00000015619	Gata3	TRGs	Lymphoid	0.65135
ENSMUSG00000015627	Gata5	AireEnh	Intestine	0.680623
ENSMUSG00000015647	Lama5	Other	Female_reproductive	0.331393
ENSMUSG00000015652	Steap1	AireEnh	Kidney	0.645359
ENSMUSG00000015653	Steap2	AireEnh	Kidney	0.4388
ENSMUSG00000015656	Hspa8	Housekeeping	Lymphoid	0.150582
ENSMUSG00000015659	Serac1	Other	Brain	0.397554
ENSMUSG00000015665	Awat1	Other	Skin	0.94182
ENSMUSG00000015668	Pdzd11	Other	Myeloid	0.169301
ENSMUSG00000015671	Psma2	Other	Myeloid	0.231883
ENSMUSG00000015672	Mrpl32	Other	Lymphoid	0.195254
ENSMUSG00000015697	Setdb1	Other	Brain	0.434667
ENSMUSG00000015702	Anxa9	TRGs	Peripheral_gland	0.673987
ENSMUSG00000015709	Arnt2	TRGs	Brain	0.623442
ENSMUSG00000015711	Prune	Other	Lymphoid	0.341008
ENSMUSG00000015714	Cers2	Other	Liver	0.340537
ENSMUSG00000015721	Nlrp5	AireEnh	Female_reproductive	0.984083
ENSMUSG00000015733	Capza2	Other	Myeloid	0.368515
ENSMUSG00000015745	Plekho1	Other	Myeloid	0.372999
ENSMUSG00000015747	Vps45	Other	Myeloid	0.31899
ENSMUSG00000015748	Prpf3	Other	Myeloid	0.274272
ENSMUSG00000015749	Anp32e	Other	Thymus	0.22822
ENSMUSG00000015750	Aph1a	Other	Liver	0.279061
ENSMUSG00000015755	Tab2	Other	Liver	0.304562
ENSMUSG00000015757	Ppil4	Other	Myeloid	0.427024
ENSMUSG00000015759	Cnih1	Other	Liver	0.0918525
ENSMUSG00000015766	Eps8	Other	Intestine	0.391537
ENSMUSG00000015776	Med22	Other	Erythroid	0.33043
ENSMUSG00000015787	Abo	AireEnh	Peripheral_gland	0.894107
ENSMUSG00000015790	Surf1	Other	Brain	0.137678
ENSMUSG00000015804	Med28	Other	Male_reproductive	0.26222
ENSMUSG00000015806	Qdpr	Other	Liver	0.308939
ENSMUSG00000015812	Gnrh1	AireEnh	Brain	0.966579
ENSMUSG00000015829	Tnr	AireEnh	Brain	0.811785
ENSMUSG00000015837	Sqstm1	Other	Myeloid	0.3108
ENSMUSG00000015839	Nfe2l2	Other	Myeloid	0.256874
ENSMUSG00000015843	Rxrg	TRGs	Brain	0.571071
ENSMUSG00000015846	Rxra	Other	Liver	0.435279
ENSMUSG00000015850	Adamtsl4	Other	Brain	0.3804
ENSMUSG00000015852	Fcrls	TRGs	Myeloid	0.559383
ENSMUSG00000015854	Cd5l	AireEnh	Liver	0.710383
ENSMUSG00000015869	Prpsap1	Housekeeping	Intestine	0.21058
ENSMUSG00000015879	Fam184b	TRGs	PNS	0.727663
ENSMUSG00000015880	Ncapg	Other	Erythroid	0.332459
ENSMUSG00000015882	Lcorl	Other	Eye	0.240119
ENSMUSG00000015889	Lta4h	Other	Myeloid	0.341842
ENSMUSG00000015890	Amdhd1	TRGs	Liver	0.846394
ENSMUSG00000015932	Dstn	Other	Intestine	0.206978
ENSMUSG00000015937	H2afy	Other	Erythroid	0.34299
ENSMUSG00000015942	Gtf2ird2	Other	Myeloid	0.29397
ENSMUSG00000015943	Bola1	Other	Brain	0.239366
ENSMUSG00000015944	Gatsl2	Other	Brain	0.307665
ENSMUSG00000015947	Fcgr1	TRGs	Myeloid	0.706739
ENSMUSG00000015950	Ncf1	Other	Myeloid	0.632526
ENSMUSG00000015957	Wnt11	Other	Lung	0.425525
ENSMUSG00000015961	Adss	Other	Lymphoid	0.238558
ENSMUSG00000015962	1700016C15Rik	AireEnh	Male_reproductive	0.949504
ENSMUSG00000015966	Il17rb	TRGs	Brain	0.681404
ENSMUSG00000015968	Cacna1d	TRGs	Brain	0.606589
ENSMUSG00000015970	Chdh	Other	Intestine	0.568866
ENSMUSG00000015971	Actr8	Other	Liver	0.230299
ENSMUSG00000015980	Lrrc27	AireEnh		0.788798
ENSMUSG00000015981	Stk32c	AireEnh	Brain	0.638423
ENSMUSG00000015994	Fnta	Housekeeping	Male_reproductive	0.181244
ENSMUSG00000016018	Skiv2l2	Other	Myeloid	0.348667
ENSMUSG00000016024	Lbp	AireEnh	Female_reproductive	0.450499
ENSMUSG00000016028	Celsr1	Other	PNS	0.307083
ENSMUSG00000016087	Fli1	Other	Myeloid	0.472087
ENSMUSG00000016128	Stard13	AireEnh	PNS	0.555475
ENSMUSG00000016150	Tenm1	TRGs	Brain	0.837914
ENSMUSG00000016179	Camk1g	AireEnh	Brain	0.583876
ENSMUSG00000016181	Diexf	Other	Lymphoid	0.342956
ENSMUSG00000016194	Hsd11b1	Other	Liver	0.587068
ENSMUSG00000016200	Syt14	Other	Liver	0.554245
ENSMUSG00000016206	H2-M3	TRGs	Myeloid	0.597785
ENSMUSG00000016239	Lonrf3	TRGs	Myeloid	0.662523
ENSMUSG00000016252	Atp5e	Housekeeping	Intestine	0.121491
ENSMUSG00000016253	Nelfcd	Other	Liver	0.222039
ENSMUSG00000016255	Tubb1	Other	Skeleton	0.619468
ENSMUSG00000016256	Ctsz	Other	Myeloid	0.458523
ENSMUSG00000016257	Slmo2	Other	Stomach	0.226057
ENSMUSG00000016262	Sertad4	AireEnh	Brain	0.46762
ENSMUSG00000016283	H2-M2	Other	Myeloid	0.832131
ENSMUSG00000016308	Ube2a	Housekeeping	Lymphoid	0.237925
ENSMUSG00000016319	Slc25a5	Housekeeping	Intestine	0.225202
ENSMUSG00000016327	Atp1b4	AireEnh	Skeleton	0.745058
ENSMUSG00000016344	Ppdpf	Other	Brain	0.151808
ENSMUSG00000016346	Kcnq2	Other	Brain	0.802247
ENSMUSG00000016349	Eef1a2	Other	Skeleton	0.589913
ENSMUSG00000016356	Col20a1	AireEnh
ENSMUSG00000016382	Pls3	Other	Artery	0.241748
ENSMUSG00000016386	Mpped2	Other	Brain	0.487971
ENSMUSG00000016409	Nkap	Other	Myeloid	0.347753
ENSMUSG00000016427	Ndufa1	Other	Heart	0.202561
ENSMUSG00000016458	Wt1	AireDep	Female_reproductive	0.627867
ENSMUSG00000016477	E2f3	Other	Brain	0.256428
ENSMUSG00000016481	Cr1l	Other	Lymphoid	0.294138
ENSMUSG00000016487	Ppfibp1	Other	Heart	0.20999
ENSMUSG00000016493	Cd46	TRGs	Male_reproductive	0.948692
ENSMUSG00000016494	Cd34	AireEnh	Lymphoid	0.278341
ENSMUSG00000016495	Plgrkt	Other	Female_reproductive	0.371267
ENSMUSG00000016496	Cd274	Other	Myeloid	0.683035
ENSMUSG00000016498	Pdcd1lg2	TRGs	Myeloid	0.93956
ENSMUSG00000016503	Gtf3a	Housekeeping	Erythroid	0.173449
ENSMUSG00000016510	Mtif3	Other	Liver	0.236955
ENSMUSG00000016520	Lnx2	Other	Lymphoid	0.339699
ENSMUSG00000016524	Il19	AireEnh
ENSMUSG00000016526	Dyrk3	TRGs	Lymphoid	0.55144
ENSMUSG00000016528	Mapkapk2	Other	Myeloid	0.323206
ENSMUSG00000016529	Il10	TRGs	Myeloid	0.890436
ENSMUSG00000016534	Lamp2	Other	Eye	0.178764
ENSMUSG00000016541	Atxn10	Housekeeping	Female_reproductive	0.213893
ENSMUSG00000016552	Foxred2	TRGs	Lymphoid	0.400318
ENSMUSG00000016554	Eif3d	Other	Male_reproductive	0.111525
ENSMUSG00000016559	H3f3b	Housekeeping
ENSMUSG00000016619	Nup50	Other	Male_reproductive	0.261179
ENSMUSG00000016624	Phf21b	TRGs	Brain	0.678861
ENSMUSG00000016626	Nlrp14	AireDep	Male_reproductive	0.97767
ENSMUSG00000016637	Ift27	Other	Male_reproductive	0.272137
ENSMUSG00000016664	Pacsin2	Other	Eye	0.26124
ENSMUSG00000016756	Cmah	TRGs	Liver	0.650299
ENSMUSG00000016757	Ttll12	Other	Erythroid	0.192417
ENSMUSG00000016758	Bik	Other	Liver	0.510941
ENSMUSG00000016763	Scube1	AireEnh	Brain	0.394772
ENSMUSG00000016831	Tox4	Other	Lymphoid	0.336499
ENSMUSG00000016833	Mrps18c	Other	Myeloid	0.409653
ENSMUSG00000016918	Sulf1	TRGs	Male_reproductive	0.234873
ENSMUSG00000016921	Srsf6	Other	PNS	0.155105
ENSMUSG00000016933	Plcg1	Other	Brain	0.270538
ENSMUSG00000016940	Kctd2	Other	PNS	0.40568
ENSMUSG00000016942	Tmprss6	AireEnh	Liver	0.812605
ENSMUSG00000016946	Kctd5	Other	Intestine	0.20327
ENSMUSG00000016982	Pom121l2	TRGs
ENSMUSG00000016984	Etaa1	Other	Brain	0.25902
ENSMUSG00000016995	Matn4	AireEnh	Skeleton	0.597279
ENSMUSG00000016998	Svs4	AireDep	Peripheral_gland	0.98589
ENSMUSG00000017000	Svs6	Other	Peripheral_gland	0.997947
ENSMUSG00000017002	Slpi	AireEnh	Myeloid	0.520716
ENSMUSG00000017003	Svs3a	AireDep	Peripheral_gland	0.998939
ENSMUSG00000017004	Svs5	AireDep	Peripheral_gland	0.988168
ENSMUSG00000017007	Rbpjl	TRGs	Peripheral_gland	0.878255
ENSMUSG00000017009	Sdc4	Other	Myeloid	0.289169
ENSMUSG00000017049	Ccdc70	TRGs
ENSMUSG00000017057	Il13ra1	Other	Intestine	0.387117
ENSMUSG00000017064	Prl5a1	AireEnh	Female_reproductive	0.983201
ENSMUSG00000017119	Nbr1	Other	Male_reproductive	0.292628
ENSMUSG00000017132	Cyth1	Other	Lymphoid	0.285643
ENSMUSG00000017144	Rnd3	Other	Brain	0.260541
ENSMUSG00000017146	Brca1	Other	Lymphoid	0.329732
ENSMUSG00000017165	Gast	AireEnh	Stomach	0.912216
ENSMUSG00000017167	Cntnap1	Other
ENSMUSG00000017176	Nt5c3b	Other	Male_reproductive	0.368083
ENSMUSG00000017188	Coa3	Other	Trachea	0.133291
ENSMUSG00000017195	Zpbp2	TRGs	Male_reproductive	0.909111
ENSMUSG00000017204	Gsdma	AireEnh	Peripheral_gland	0.812653
ENSMUSG00000017210	Med24	Other	Male_reproductive	0.324038
ENSMUSG00000017211	Gsdma2	AireEnh	Stomach	0.941707
ENSMUSG00000017221	Psmd3	Other	Intestine	0.142806
ENSMUSG00000017264	Exosc10	Other	Male_reproductive	0.256613
ENSMUSG00000017286	Glod4	Other	Myeloid	0.253425
ENSMUSG00000017288	Vps53	Other	Brain	0.100626
ENSMUSG00000017291	Taok1	Other	Lymphoid	0.326271
ENSMUSG00000017299	Dnttip1	Other	Erythroid	0.130214
ENSMUSG00000017300	Tnnc2	AireEnh	Skeleton	0.623787
ENSMUSG00000017307	Acot8	Other	Intestine	0.362748
ENSMUSG00000017309	Cd300lg	AireEnh	Liver	0.602694
ENSMUSG00000017310	Spint4	AireDep	Male_reproductive	0.988316
ENSMUSG00000017311	Pyy	AireEnh	Peripheral_gland	0.78104
ENSMUSG00000017314	Mpp2	AireEnh	Brain	0.457771
ENSMUSG00000017316	Ppy	AireDep	Peripheral_gland	0.850294
ENSMUSG00000017344	Vtn	AireEnh	Liver	0.64491
ENSMUSG00000017376	Nlk	Other	Brain	0.26822
ENSMUSG00000017386	Traf4	Other	Lymphoid	0.275745
ENSMUSG00000017390	Aldoc	Other	Brain	0.54966
ENSMUSG00000017400	Stac2	AireEnh	Myeloid	0.551377
ENSMUSG00000017404	Rpl19	Housekeeping
ENSMUSG00000017405	Nek8	Other	Lymphoid	0.408885
ENSMUSG00000017412	Cacnb4	TRGs	Brain	0.75888
ENSMUSG00000017417	Plxdc1	TRGs	Thymus	0.487792
ENSMUSG00000017418	Arl5b	Other	Lymphoid	0.375615
ENSMUSG00000017421	Zfp207	Other	Myeloid	0.119567
ENSMUSG00000017428	Psmd11	Other	Myeloid	0.323253
ENSMUSG00000017446	C1qtnf1	AireEnh	Liver	0.594214
ENSMUSG00000017453	Pipox	TRGs	Liver	0.683603
ENSMUSG00000017466	Timp2	AireEnh	Artery	0.259024
ENSMUSG00000017478	Zc3h18	Other	Liver	0.225772
ENSMUSG00000017485	Top2b	Other	Thymus	0.134638
ENSMUSG00000017491	Rarb	TRGs	Liver	0.489809
ENSMUSG00000017493	Igfbp4	Other	Liver	0.412951
ENSMUSG00000017499	Cdc6	TRGs	Lymphoid	0.388716
ENSMUSG00000017548	Suz12	Other	Liver	0.311337
ENSMUSG00000017550	Atad5	TRGs	Erythroid	0.411598
ENSMUSG00000017561	Crlf3	Other	Myeloid	0.312211
ENSMUSG00000017588	Krt27	AireEnh	Skin	0.95295
ENSMUSG00000017607	Tns4	Other	Cecum	0.611137
ENSMUSG00000017615	Tnfaip1	Other	Intestine	0.179663
ENSMUSG00000017631	Abr	Other	Brain	0.43521
ENSMUSG00000017639	Rab11fip4	TRGs	Brain	0.51539
ENSMUSG00000017652	Cd40	TRGs	Myeloid	0.776971
ENSMUSG00000017664	Slc35c2	Other	Peripheral_gland	0.299826
ENSMUSG00000017667	Zfp334	TRGs	Brain	0.366262
ENSMUSG00000017670	Elmo2	Other	Brain	0.259083
ENSMUSG00000017677	Wsb1	Other	Myeloid	0.216389
ENSMUSG00000017679	Ttpal	TRGs	Lymphoid	0.322116
ENSMUSG00000017686	Rhot1	Other	Male_reproductive	0.16837
ENSMUSG00000017688	Hnf4g	TRGs	Intestine	0.858079
ENSMUSG00000017692	Rhbdl3	TRGs	PNS	0.535895
ENSMUSG00000017697	Ada	TRGs	Intestine	0.663818
ENSMUSG00000017707	Serinc3	Other	Lymphoid	0.178016
ENSMUSG00000017713	Tha1	Other	Intestine	0.424459
ENSMUSG00000017715	Pgs1	Other	Myeloid	0.282931
ENSMUSG00000017716	Birc5	Other	Erythroid	0.27674
ENSMUSG00000017718	Afmid	TRGs	Myeloid	0.591287
ENSMUSG00000017720	Trp53tg5	TRGs
ENSMUSG00000017721	Pigt	Other	Brain	0.205193
ENSMUSG00000017723	Wfdc2	Other	Trachea	0.587793
ENSMUSG00000017724	Etv4	AireEnh	PNS	0.362361
ENSMUSG00000017733	Eppin	AireDep	Male_reproductive	0.984683
ENSMUSG00000017734	Dbndd2	TRGs	Spinal_cord	0.333932
ENSMUSG00000017737	Mmp9	TRGs	Myeloid	0.625374
ENSMUSG00000017740	Slc12a5	TRGs	Brain	0.719882
ENSMUSG00000017747	Ghdc	Other	Myeloid	0.35176
ENSMUSG00000017754	Pltp	Other	Myeloid	0.454034
ENSMUSG00000017756	Slc12a7	Other	Intestine	0.270068
ENSMUSG00000017760	Ctsa	Other	Myeloid	0.259631
ENSMUSG00000017764	Zswim1	Other	Brain	0.265898
ENSMUSG00000017765	Slc12a4	Other	Liver	0.288503
ENSMUSG00000017767	Spata25	TRGs	Male_reproductive	0.991732
ENSMUSG00000017774	Myo1c	Other	Female_reproductive	0.309454
ENSMUSG00000017776	Crk	Other	Lymphoid	0.236146
ENSMUSG00000017778	Cox7c	Housekeeping
ENSMUSG00000017781	Pitpna	Housekeeping	Intestine	0.216136
ENSMUSG00000017801	Mlx	Housekeeping	Intestine	0.27535
ENSMUSG00000017802	Fam134c	Other	Erythroid	0.38881
ENSMUSG00000017817	Jph2	AireDep	Skeleton	0.622695
ENSMUSG00000017830	Dhx58	Other	Myeloid	0.575384
ENSMUSG00000017831	Rab5a	Other	Liver	0.215142
ENSMUSG00000017832	Hspb9	TRGs	Male_reproductive	0.935008
ENSMUSG00000017837	Nkiras2	Other	Male_reproductive	0.43477
ENSMUSG00000017843	Ppp2r5c	Other	Myeloid	0.439199
ENSMUSG00000017858	Ift52	Other	Liver	0.317882
ENSMUSG00000017861	Mybl2	TRGs	Brain	0.389419
ENSMUSG00000017868	Sgk2	AireEnh	Liver	0.744502
ENSMUSG00000017897	Eya2	TRGs	Brain	0.476493
ENSMUSG00000017922	Prl3c1	AireDep	Female_reproductive	0.998972
ENSMUSG00000017929	B4galt5	Other	Myeloid	0.394021
ENSMUSG00000017943	Gdap1l1	TRGs	Brain	0.662354
ENSMUSG00000017950	Hnf4a	AireEnh	Intestine	0.752586
ENSMUSG00000017969	Ptgis	AireEnh	Artery	0.502253
ENSMUSG00000017978	Cadps2	Other	Brain	0.577268
ENSMUSG00000017999	Ddx27	Other	Lymphoid	0.239221
ENSMUSG00000018001	Cyth3	Other	Lung	0.231567
ENSMUSG00000018008	Cyth4	AireEnh	Myeloid	0.510242
ENSMUSG00000018012	Rac3	Other	Brain	0.477639
ENSMUSG00000018040	Rrp7a	Other	Fat	0.372284
ENSMUSG00000018042	Cyb5r3	Other	Intestine	0.240527
ENSMUSG00000018068	Ints2	Other	Kidney	0.261885
ENSMUSG00000018076	Med13l	Other	Lymphoid	0.452332
ENSMUSG00000018102	Hist1h2bc	Other
ENSMUSG00000018126	Baiap2l2	AireEnh	Intestine	0.667984
ENSMUSG00000018143	Mafk	Other	Myeloid	0.423208
ENSMUSG00000018160	Med1	Other	Erythroid	0.361542
ENSMUSG00000018166	Erbb3	Other	Intestine	0.487516
ENSMUSG00000018167	Stard3	Other	Myeloid	0.332317
ENSMUSG00000018168	Ikzf3	TRGs	Erythroid	0.70168
ENSMUSG00000018169	Mfng	Other	Lymphoid	0.388507
ENSMUSG00000018171	Vmp1	Other	Myeloid	0.266529
ENSMUSG00000018189	Uchl5	Other	Erythroid	0.216755
ENSMUSG00000018196	Glrx2	Other	Male_reproductive	0.322576
ENSMUSG00000018199	Trove2	Other	Brain	0.218537
ENSMUSG00000018209	Stk4	Other	Lymphoid	0.481113
ENSMUSG00000018211	Wfdc15b	AireEnh	Male_reproductive	0.825956
ENSMUSG00000018217	Pmp22	AireEnh	PNS	0.250621
ENSMUSG00000018238	Gdf9	TRGs	Female_reproductive	0.911057
ENSMUSG00000018239	Zcchc10	Other	Myeloid	0.372532
ENSMUSG00000018259	Prl8a2	TRGs	Female_reproductive	0.924569
ENSMUSG00000018263	Tbx5	AireEnh	Heart	0.774197
ENSMUSG00000018286	Psmb6	Other	Myeloid	0.219071
ENSMUSG00000018287	Spag7	Housekeeping	Myeloid	0.166976
ENSMUSG00000018293	Pfn1	Other	Myeloid	0.203534
ENSMUSG00000018322	Tomm34	Other	Lymphoid	0.294706
ENSMUSG00000018326	Ywhab	Housekeeping	Brain	0.117417
ENSMUSG00000018334	Ksr1	TRGs	Intestine	0.400903
ENSMUSG00000018339	Gpx3	AireEnh	Kidney	0.377047
ENSMUSG00000018340	Anxa6	Other	Lymphoid	0.0941295
ENSMUSG00000018341	Il12rb2	TRGs	Lymphoid	0.749683
ENSMUSG00000018347	Zkscan6	Other	Lymphoid	0.396658
ENSMUSG00000018362	Kpna2	Other	Myeloid	0.449101
ENSMUSG00000018363	Smurf2	Other	Brain	0.459025
ENSMUSG00000018372	Cep95	Other	Male_reproductive	0.447815
ENSMUSG00000018377	Vezf1	Other	Erythroid
ENSMUSG00000018378	Cuedc1	Other	Liver
ENSMUSG00000018379	Srsf1	Other	Lymphoid	0.137827
ENSMUSG00000018381	Abi3	TRGs	Thymus	0.475329
ENSMUSG00000018387	Shroom1	TRGs	Liver	0.612294
ENSMUSG00000018395	Kif3a	Other	Myeloid	0.362578
ENSMUSG00000018398	Sept8		Heart	0.251485
ENSMUSG00000018401	Mtmr4	Other	Intestine	0.401185
ENSMUSG00000018405	Mrm1	Other	Lymphoid	0.588714
ENSMUSG00000018411	Mapt	AireEnh	Brain	0.555215
ENSMUSG00000018412	Kansl1	Other	Brain	0.338722
ENSMUSG00000018415	Gid4	Other	Liver	0.421419
ENSMUSG00000018417	Myo1b	Other	Liver	0.325652
ENSMUSG00000018425	Dhx40	Other	Male_reproductive	0.274292
ENSMUSG00000018427	Ypel2	Other	Lymphoid	0.37946
ENSMUSG00000018428	Akap1	Other	Male_reproductive	0.558501
ENSMUSG00000018433	Nol11	Other	Lymphoid	0.205452
ENSMUSG00000018442	Derl2	Other	Liver	0.303219
ENSMUSG00000018446	C1qbp	Other	Erythroid	0.159656
ENSMUSG00000018449	Rpain	Other	Liver	0.42623
ENSMUSG00000018451	6330403K07Rik
ENSMUSG00000018459	Slc13a3	AireEnh	Liver	0.719648
ENSMUSG00000018470	Kcnab3	AireEnh	Brain	0.638828
ENSMUSG00000018474	Chd3	Other	Intestine	0.41057
ENSMUSG00000018476	Kdm6b	Other	Lymphoid	0.629328
ENSMUSG00000018479	1700125H20Rik	AireEnh	Male_reproductive	1
ENSMUSG00000018481	Appbp2	Other	Lymphoid	0.274698
ENSMUSG00000018486	Wnt9b	AireEnh	Liver	0.891787
ENSMUSG00000018500	Adora2b	TRGs	Myeloid	0.56026
ENSMUSG00000018501	Ncor1	Housekeeping	Lymphoid	0.196366
ENSMUSG00000018507	Trpv2	Other	Myeloid	0.547267
ENSMUSG00000018509	Cenpv	TRGs	Male_reproductive	0.360387
ENSMUSG00000018537	Pcgf2	Other	PNS	0.260905
ENSMUSG00000018541	Cwc25	Other	Lymphoid	0.412257
ENSMUSG00000018543	1700001P01Rik	TRGs	Male_reproductive	0.970157
ENSMUSG00000018547	Pip4k2b	Other	Brain	0.330999
ENSMUSG00000018548	Trim37	Other	Male_reproductive	0.48845
ENSMUSG00000018554	Ybx2	TRGs	Male_reproductive	0.813784
ENSMUSG00000018559	Ctdnep1	Other	Myeloid	0.160934
ENSMUSG00000018565	Elp5	Other	Male_reproductive	0.385859
ENSMUSG00000018566	Slc2a4	TRGs	Skeleton	0.447936
ENSMUSG00000018567	Gabarap	Housekeeping	Myeloid	0.186377
ENSMUSG00000018569	Cldn7	Other	Intestine	0.534679
ENSMUSG00000018570	2810408A11Rik	Other	Male_reproductive	0.71974
ENSMUSG00000018572	Phf23	Other	Myeloid	0.36255
ENSMUSG00000018574	Acadvl	Other	Heart	0.305276
ENSMUSG00000018581	Dnah11	TRGs	Brain	0.658831
ENSMUSG00000018583	G3bp1	Other	Brain	0.416751
ENSMUSG00000018585	Atox1	Other	Liver	0.266358
ENSMUSG00000018589	Glra2	TRGs	Spinal_cord	0.887426
ENSMUSG00000018593	Sparc	AireEnh	Skeleton	0.18287
ENSMUSG00000018595	Glra4	AireEnh
ENSMUSG00000018599	Mief2	TRGs	Brain	0.460477
ENSMUSG00000018604	Tbx3	TRGs	Peripheral_gland	0.489686
ENSMUSG00000018620	Mmp20	AireEnh	Hair	0.916339
ENSMUSG00000018623	Mmp7	AireEnh	Peripheral_gland	0.817931
ENSMUSG00000018634	Crhr1	AireEnh	Brain	0.868564
ENSMUSG00000018648	Dusp14	TRGs	Skin	0.48472
ENSMUSG00000018651	Tada2a	Other	Eye	0.212104
ENSMUSG00000018654	Ikzf1	Other	Myeloid	0.564046
ENSMUSG00000018656	Tcaf3		Peripheral_gland	0.994231
ENSMUSG00000018659	Pnpo	Other	Liver	0.411931
ENSMUSG00000018661	Cog1	Other
ENSMUSG00000018666	Cbx1	Other	Myeloid	0.209842
ENSMUSG00000018669	Cdk5rap3	Other	Liver	0.312427
ENSMUSG00000018672	Copz2	Other	Peripheral_gland	0.290417
ENSMUSG00000018677	Slc25a39	Other	Male_reproductive	0.237378
ENSMUSG00000018678	Sp2	Other	Lymphoid	0.268342
ENSMUSG00000018697	Aatf	Other	Myeloid	0.308877
ENSMUSG00000018698	Lhx1	AireEnh	Brain	0.8438
ENSMUSG00000018707	Dync1h1	Other	Myeloid	0.178569
ENSMUSG00000018727	Cpsf4l	TRGs	Thymus	0.82021
ENSMUSG00000018733	Pex12	Other	Male_reproductive	0.376677
ENSMUSG00000018736	Ndel1	Other	Myeloid	0.294487
ENSMUSG00000018740	Slc25a35	TRGs	Artery	0.349314
ENSMUSG00000018750	Zbtb4	Other	Lymphoid	0.406809
ENSMUSG00000018752	Tnfsfm13		Liver	0.427667
ENSMUSG00000018761	Mpdu1	Other	Eye	0.22167
ENSMUSG00000018765	Fxr2	Other	Male_reproductive	0.174501
ENSMUSG00000018770	Atp5g3	Housekeeping	Liver	0.206935
ENSMUSG00000018774	Cd68	Other	Myeloid	0.472319
ENSMUSG00000018776	Slc35g3	TRGs	Male_reproductive	0.921785
ENSMUSG00000018796	Acsl1	Other	Myeloid	0.424907
ENSMUSG00000018800	Abca5	Other	Peripheral_gland	0.41755
ENSMUSG00000018809	Smyd4	TRGs	Myeloid	0.360182
ENSMUSG00000018819	Lsp1	Other	Myeloid	0.514583
ENSMUSG00000018820	Zfyve27	Other	Myeloid	0.297453
ENSMUSG00000018821	Avpi1	Other	Trachea	0.386398
[truncated: 26,000 more rows]
