# Supplementary figures and images for: Ageing compromises mouse thymus function and remodels epithelial cell differentiation
Source: eLife journal article supplement (doi:10.7554/elife.56221), 2020-08-25

**a**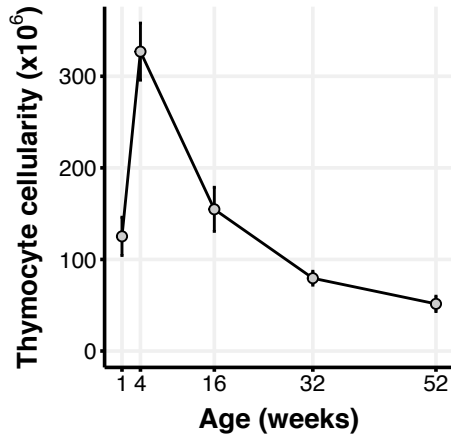**b**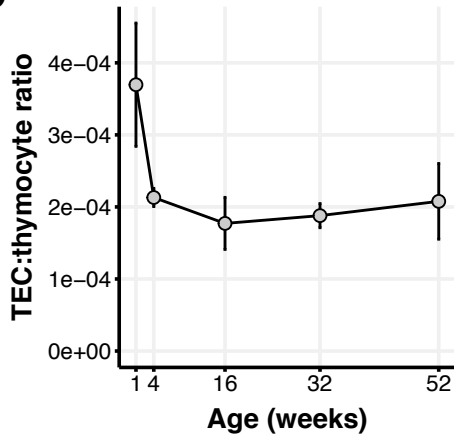**c**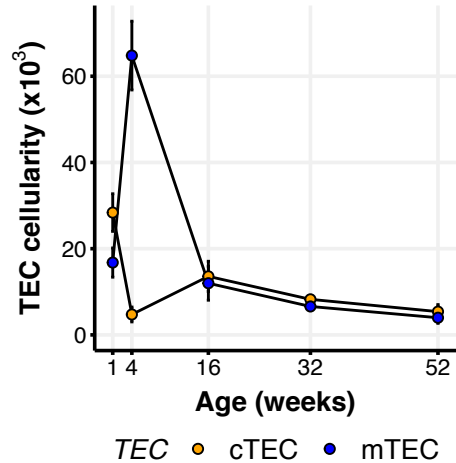

Supplement: supp [file elife-56221-supp-v1.zip › elife_poa_e56221_Figure_1_figure_supplement_1.pdf]

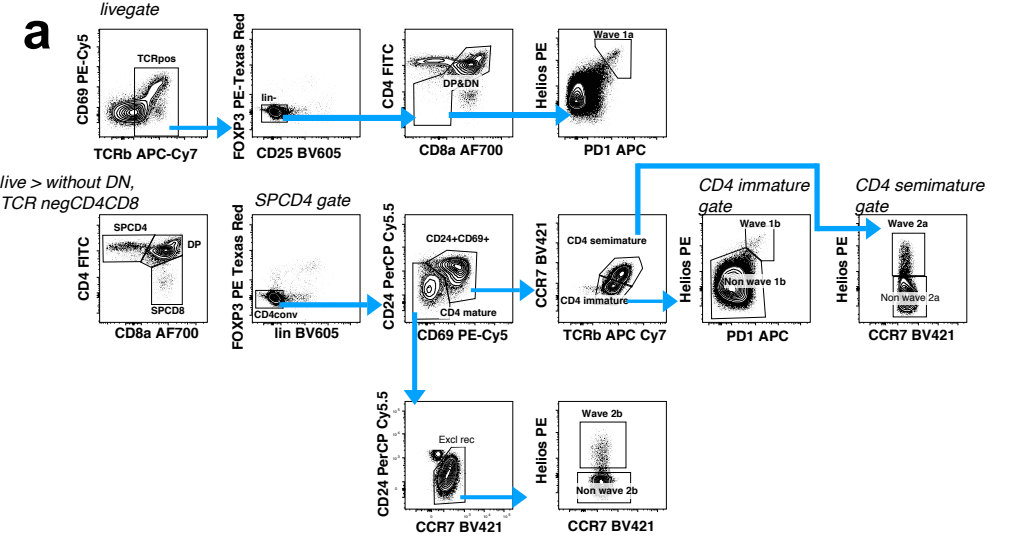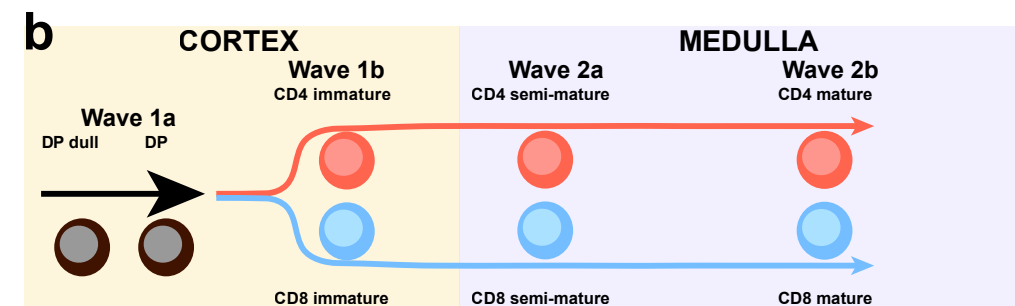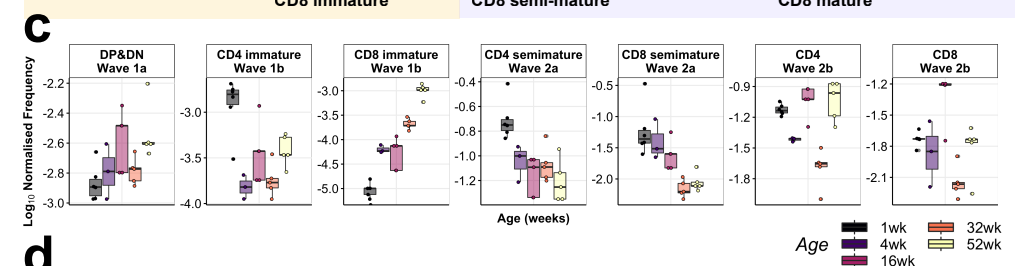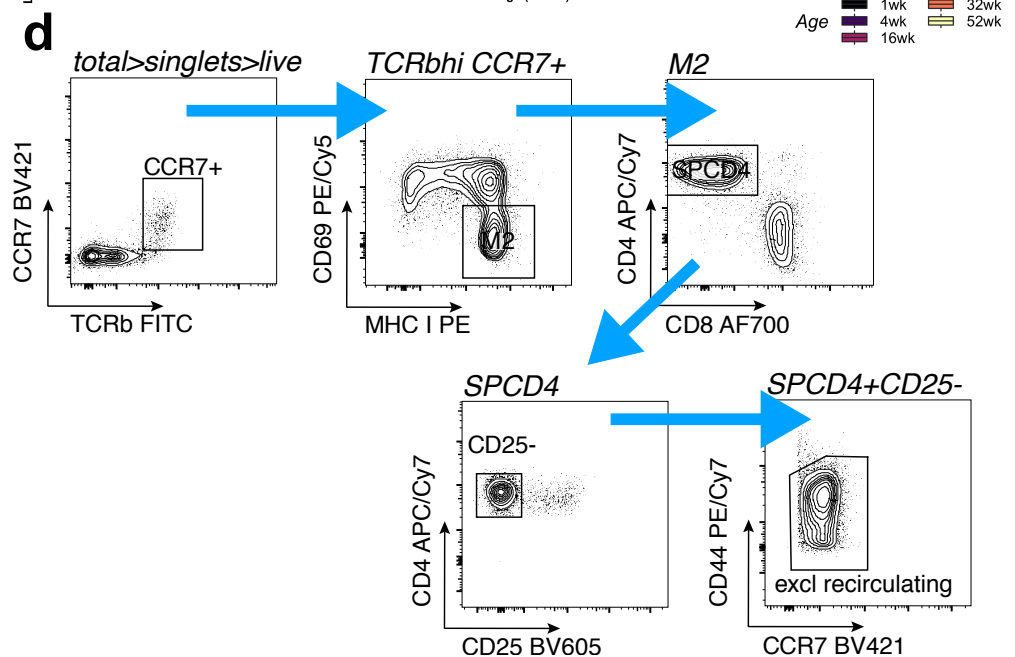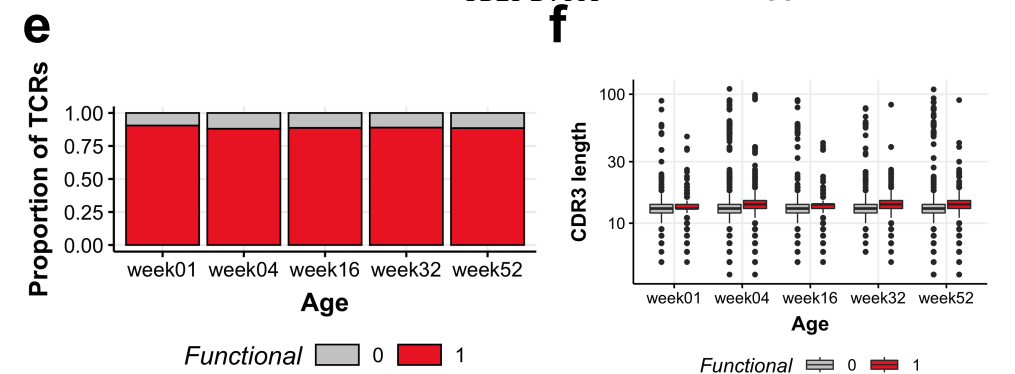

Supplement: supp [file elife-56221-supp-v1.zip › elife_poa_e56221_Figure_1_figure_supplement_2.pdf]

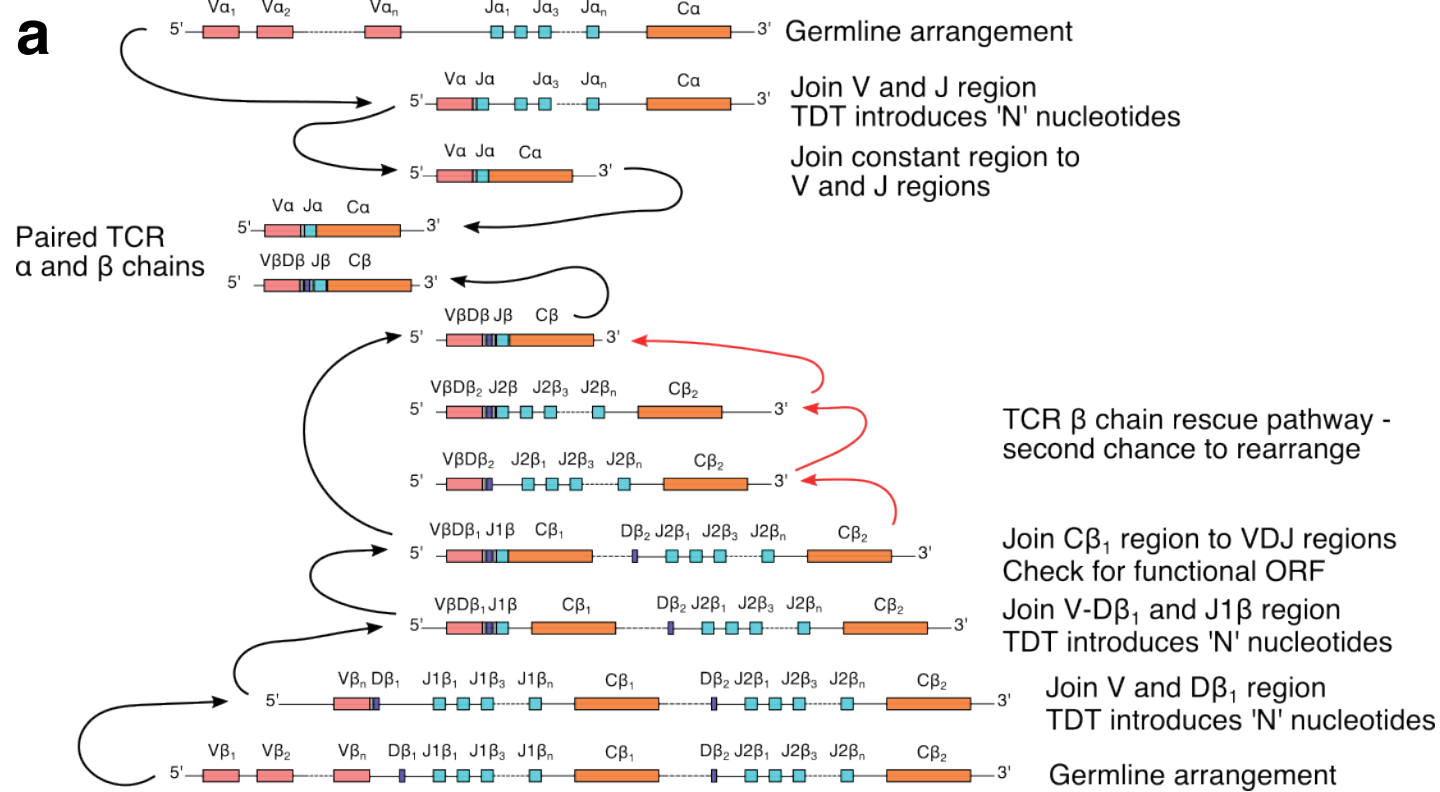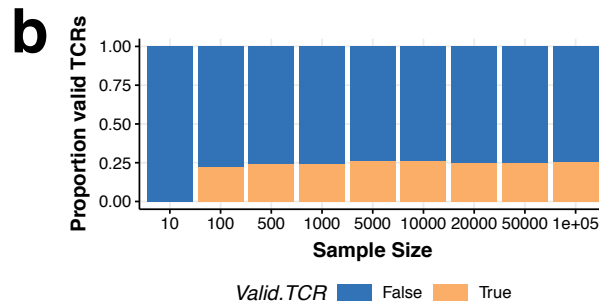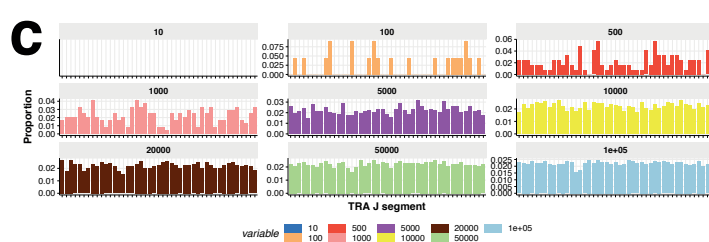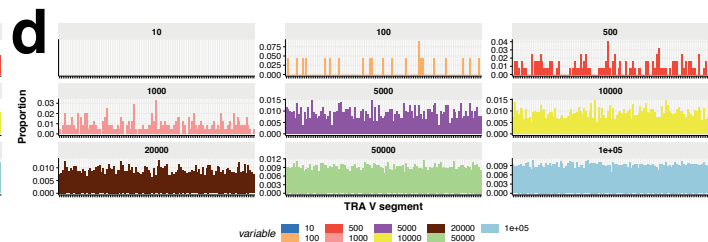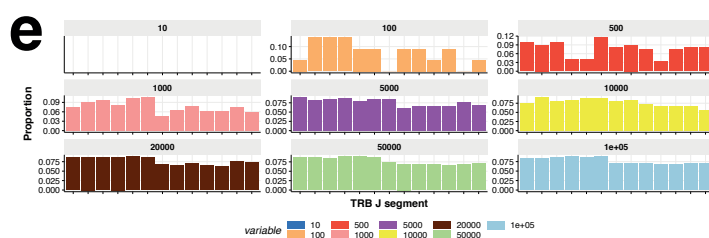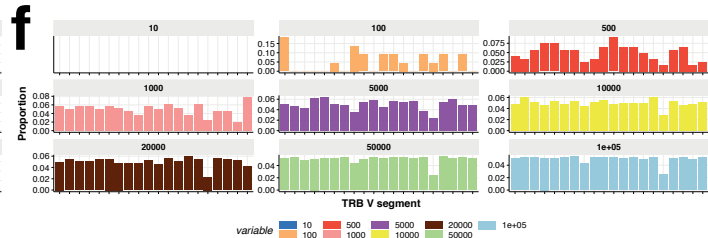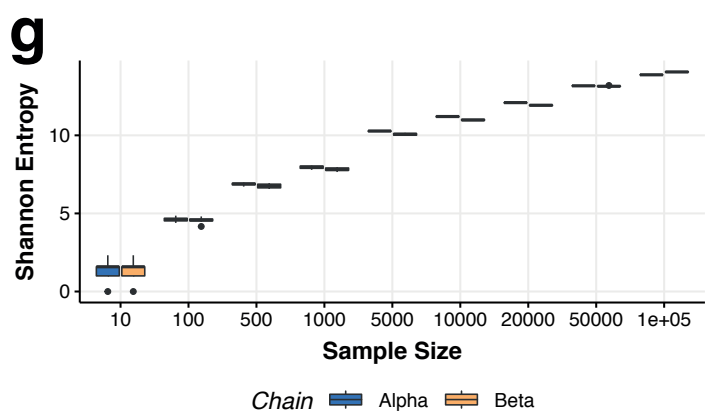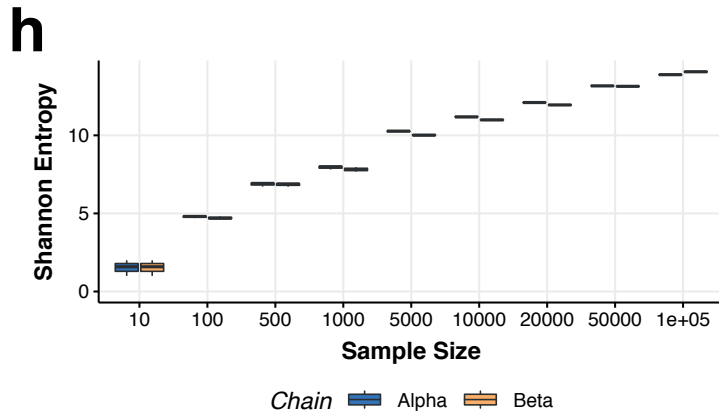

Supplement: supp [file elife-56221-supp-v1.zip › elife_poa_e56221_Figure_1_figure_supplement_3.pdf]

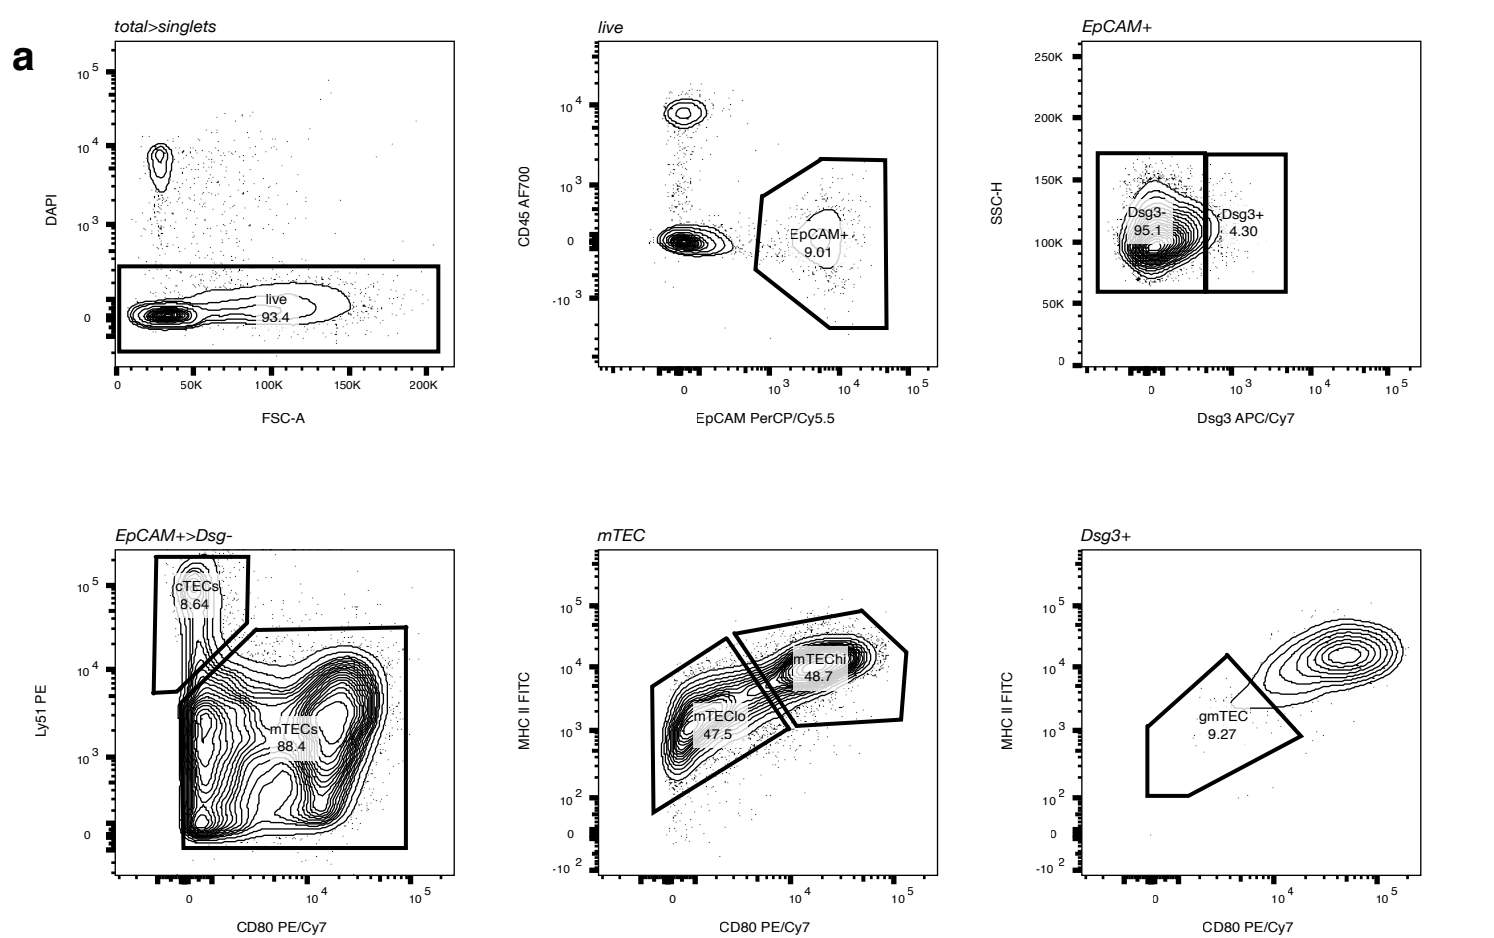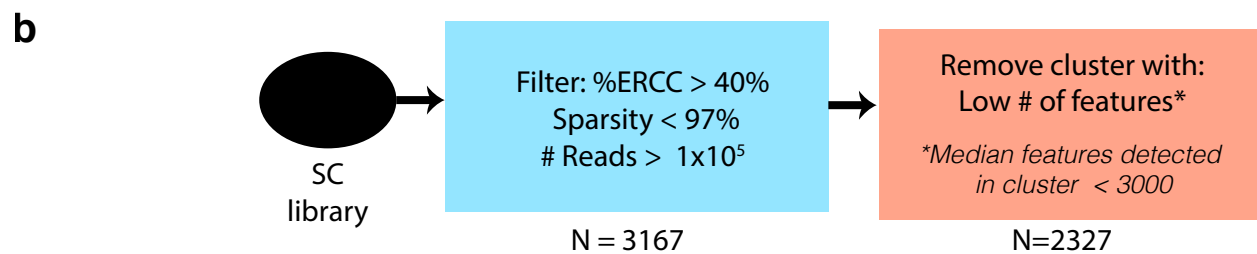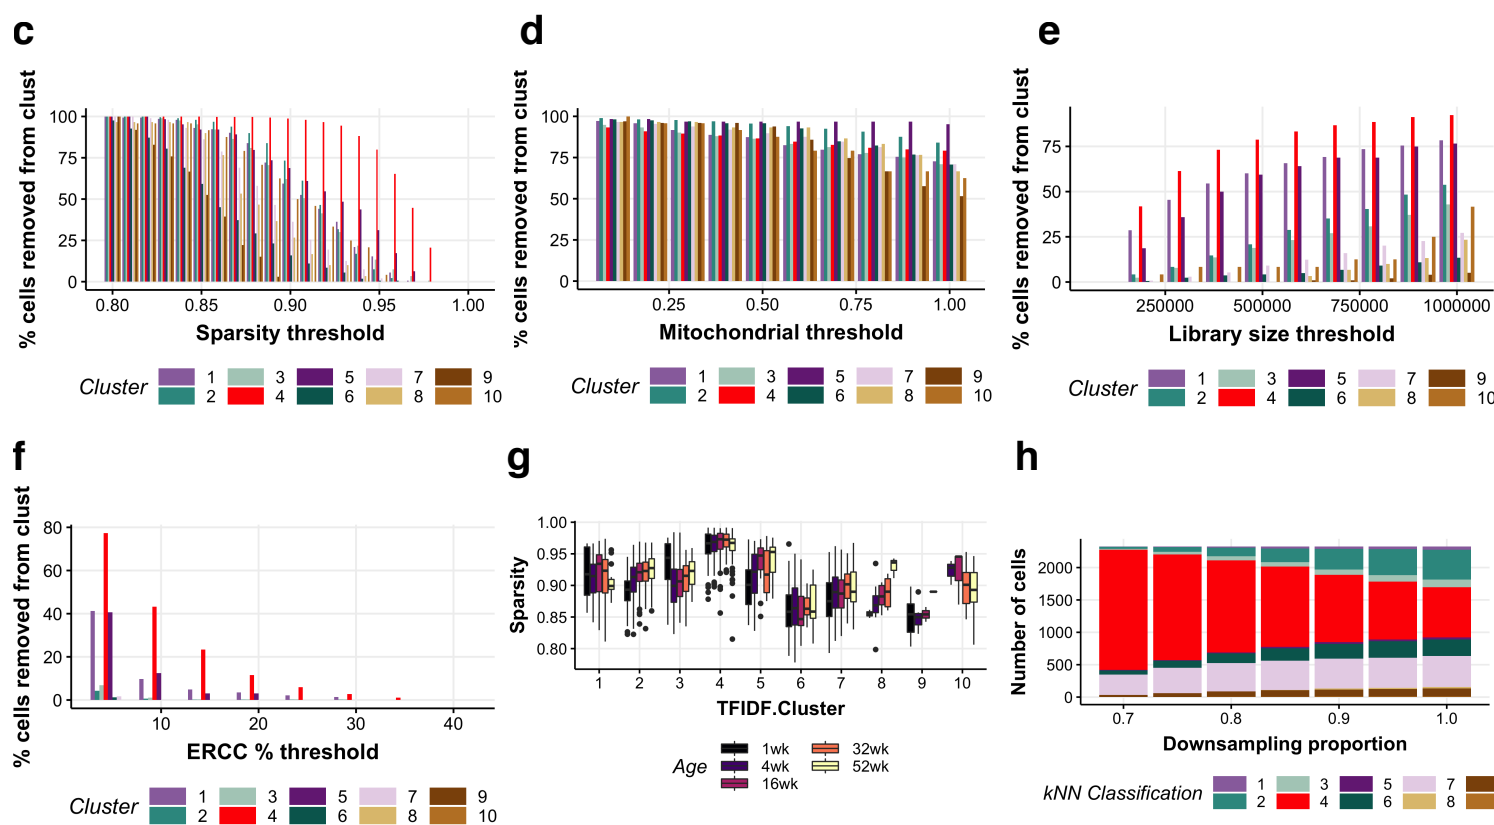

Supplement: supp [file elife-56221-supp-v1.zip › elife_poa_e56221_Figure_2_figure_supplement_1.pdf]

## Bornstein

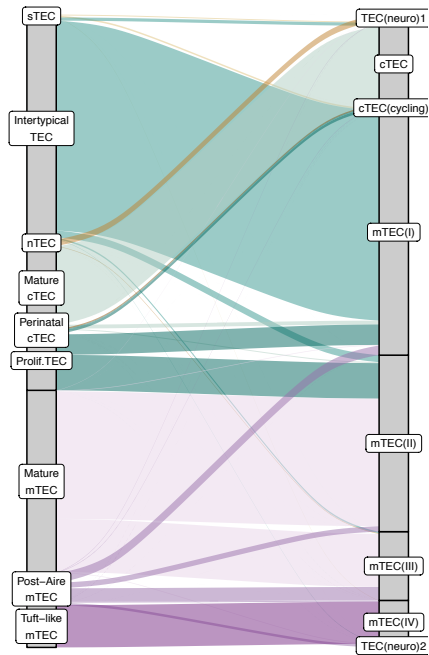

## Park

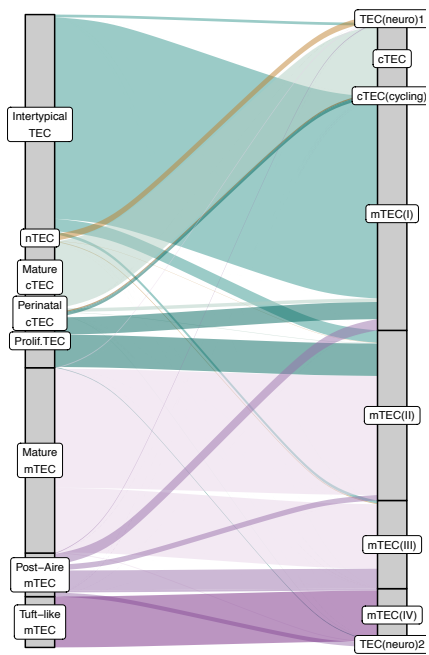

## Ageing

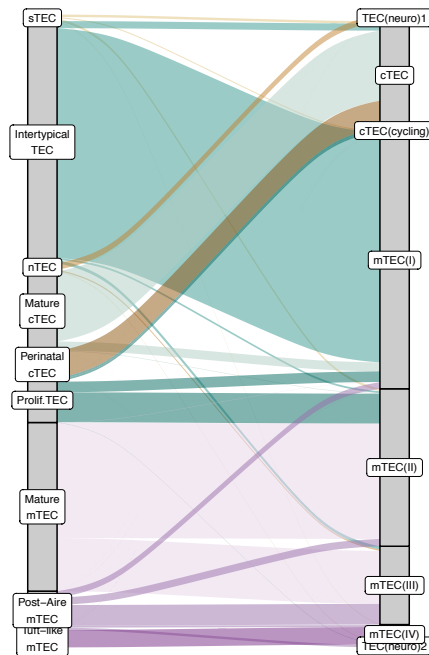

### Age Class

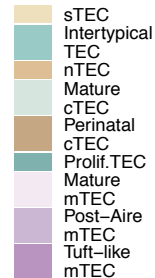

Supplement: supp [file elife-56221-supp-v1.zip › elife_poa_e56221_Figure_2_figure_supplement_2.pdf]

**a**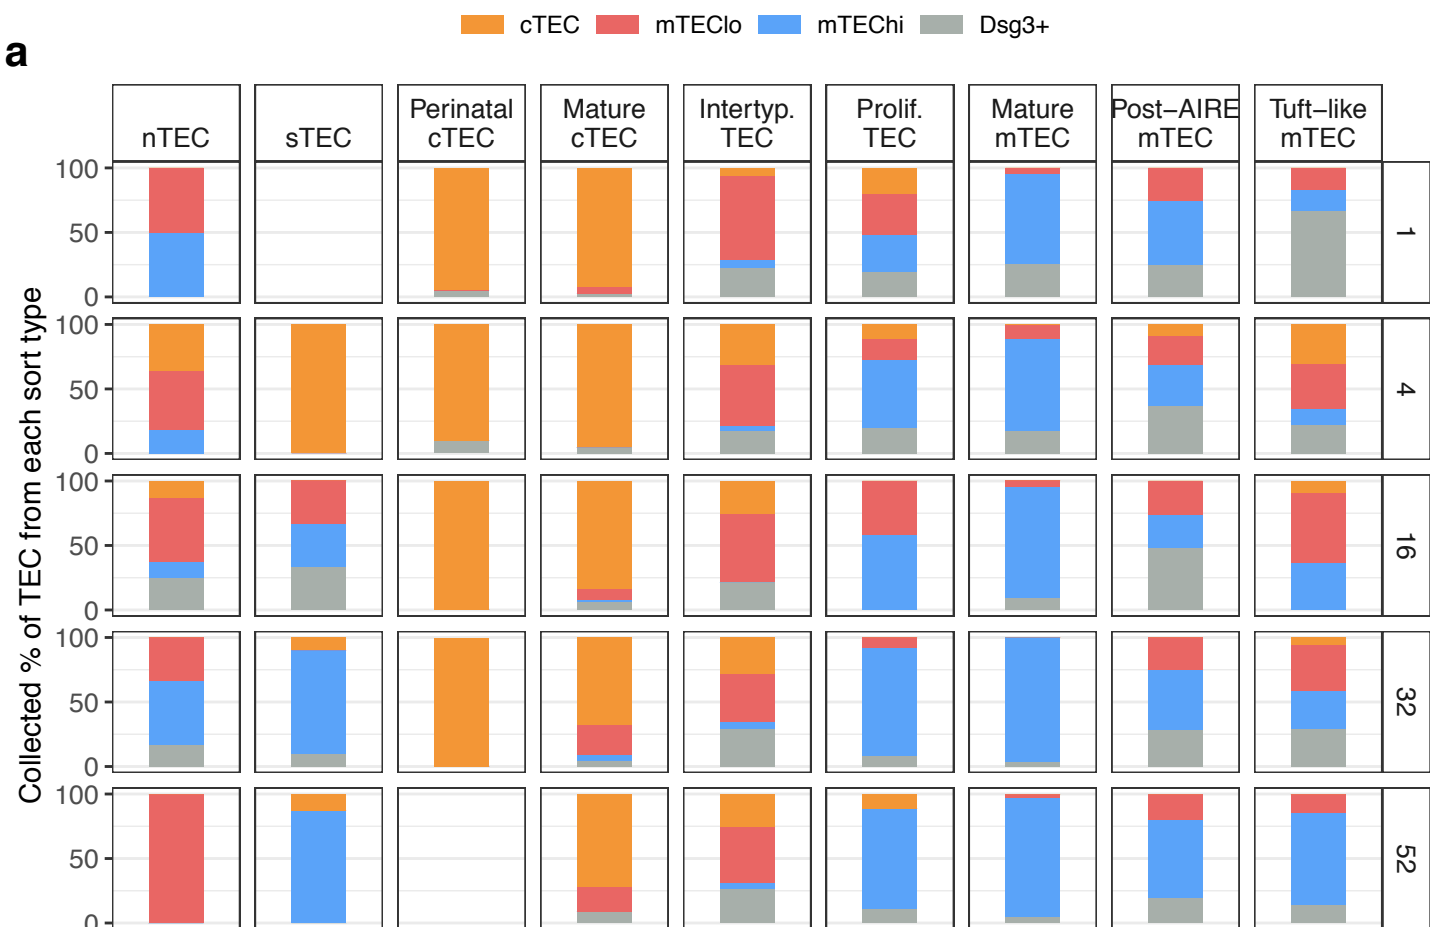**b**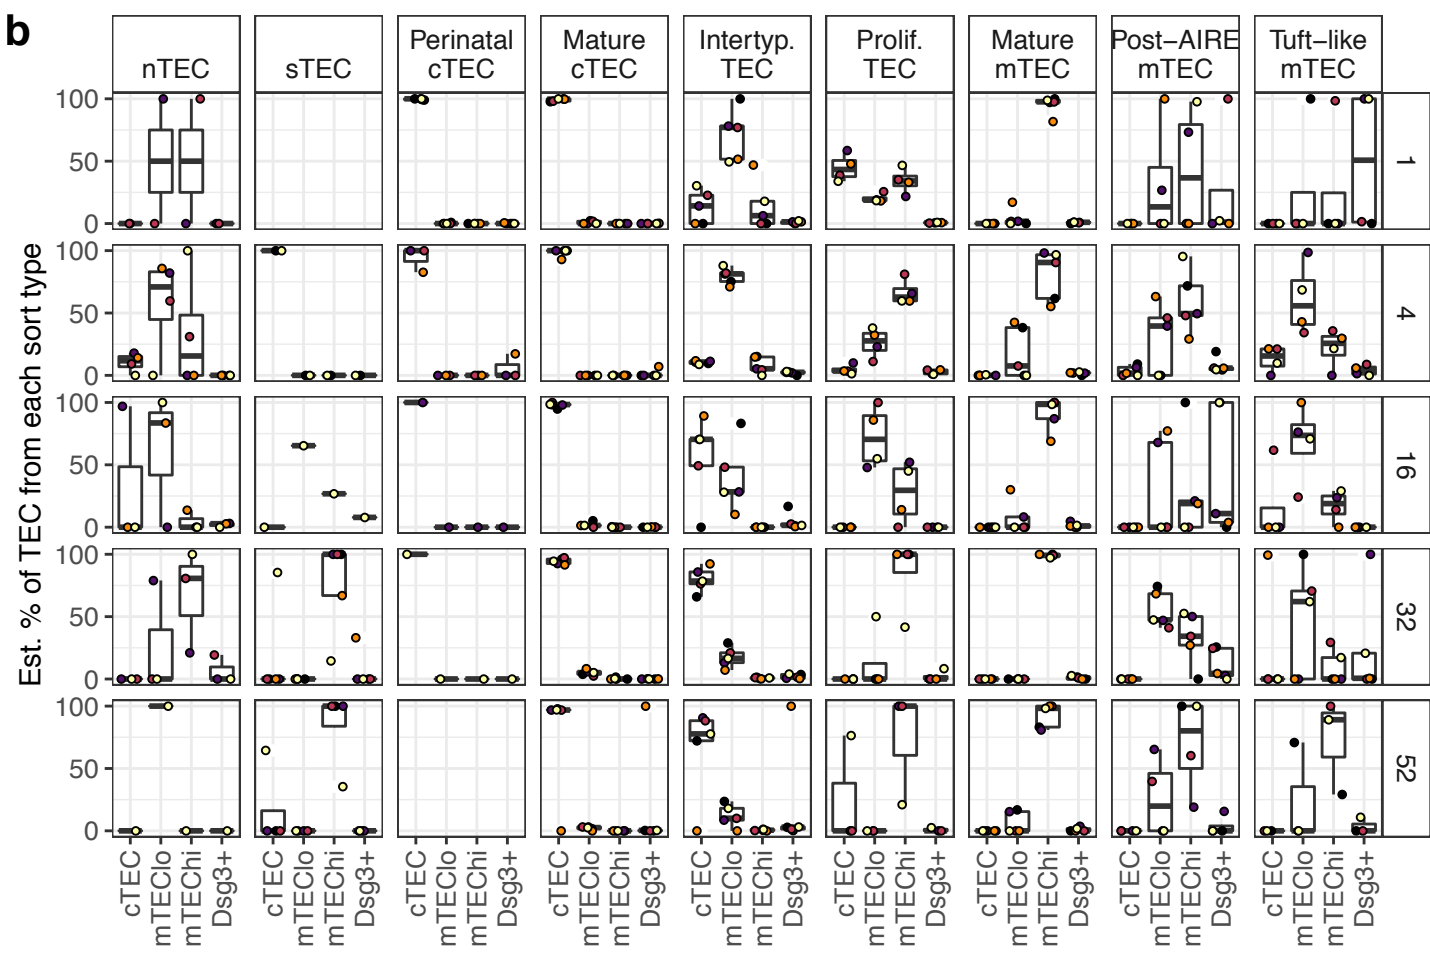

Supplement: supp [file elife-56221-supp-v1.zip › elife_poa_e56221_Figure_2_figure_supplement_3.pdf]

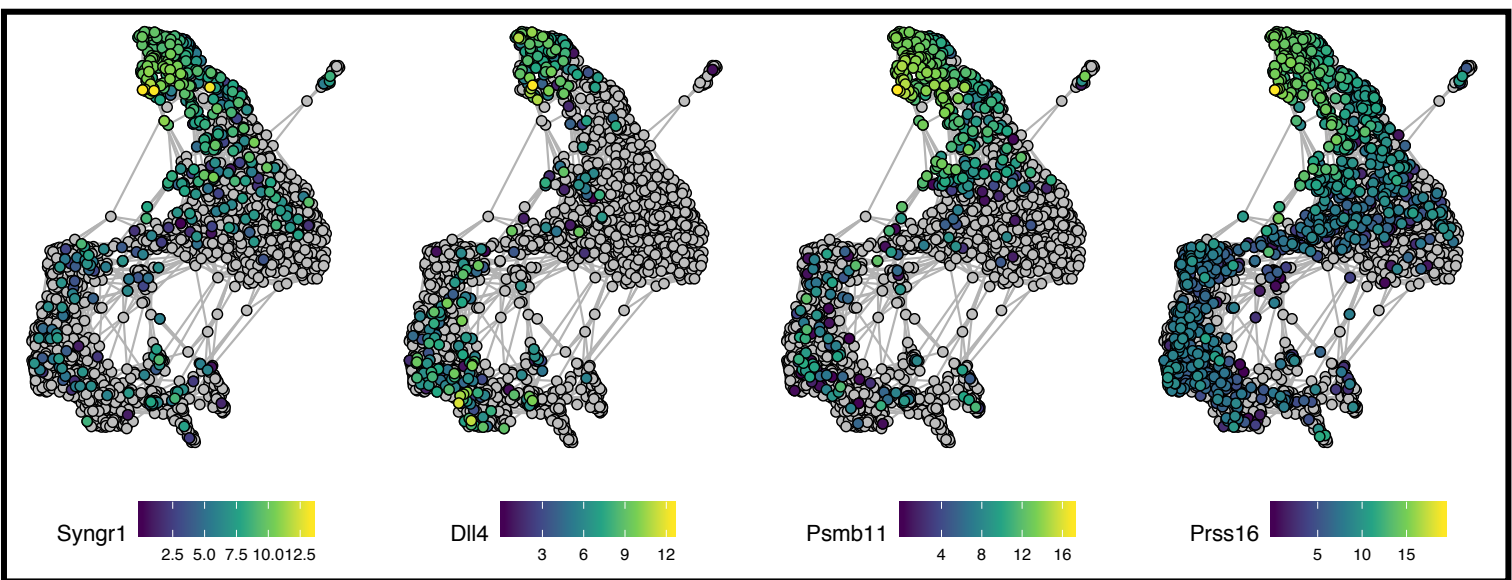

cTEC

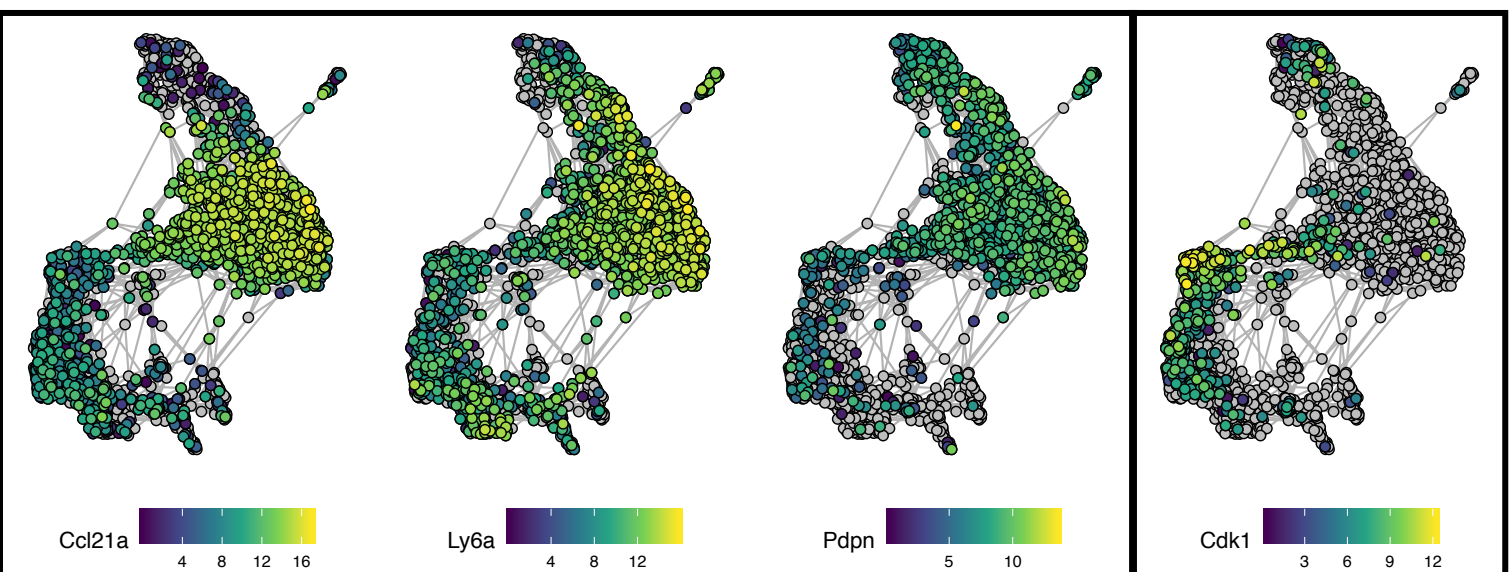

Intertypal TEC

Prolif. TEC

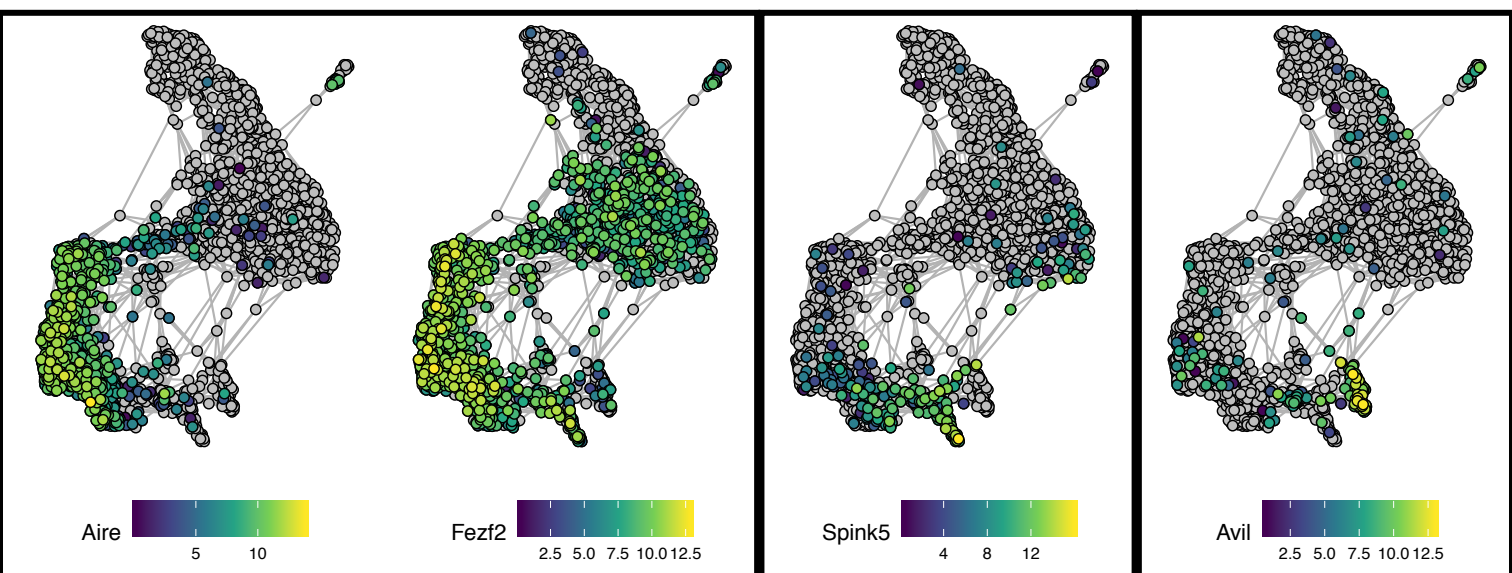

mTEC

Post AIRE

Tuft-liike

Supplement: supp [file elife-56221-supp-v1.zip › elife_poa_e56221_Figure_2_figure_supplement_4.pdf]

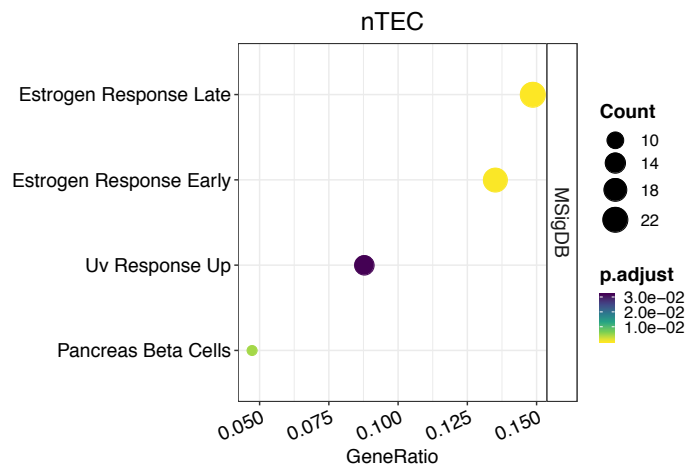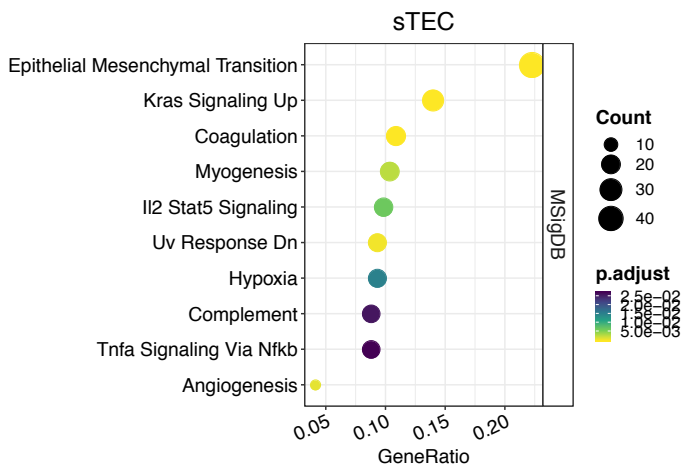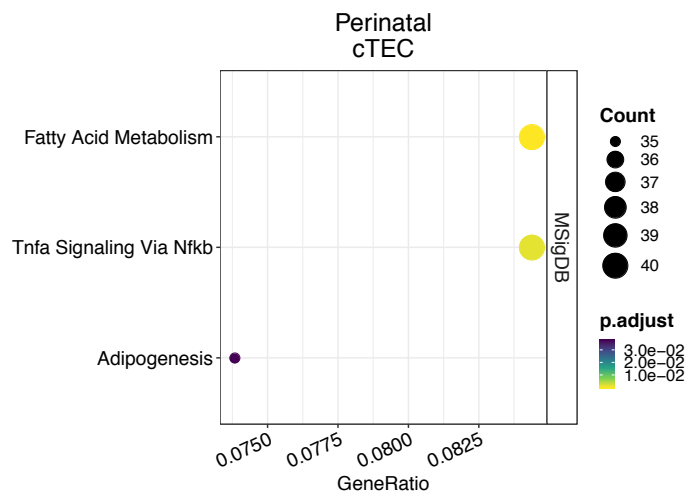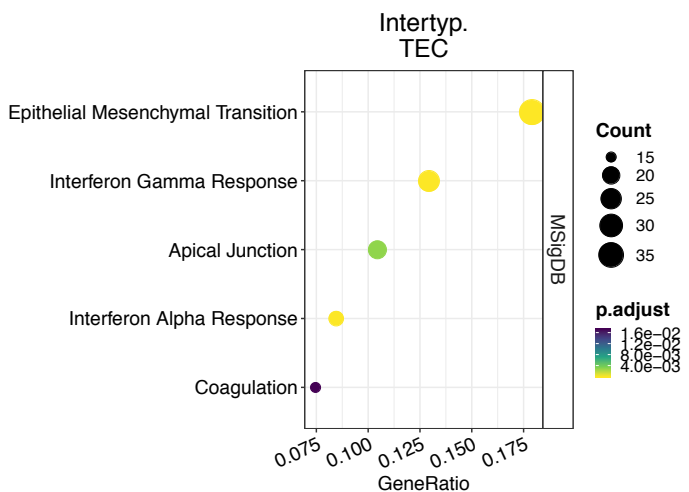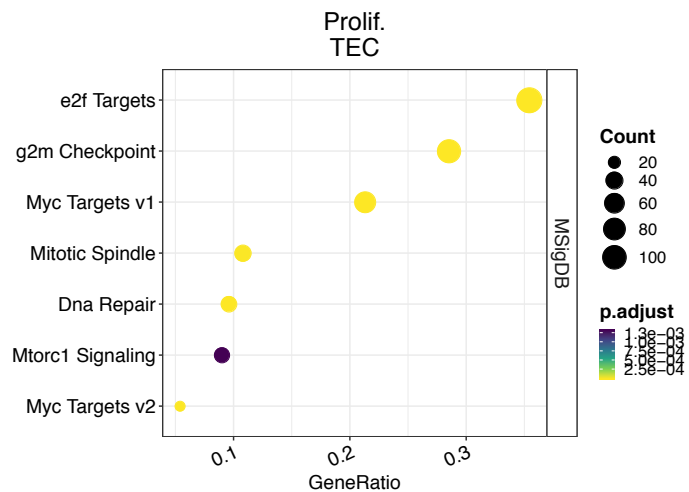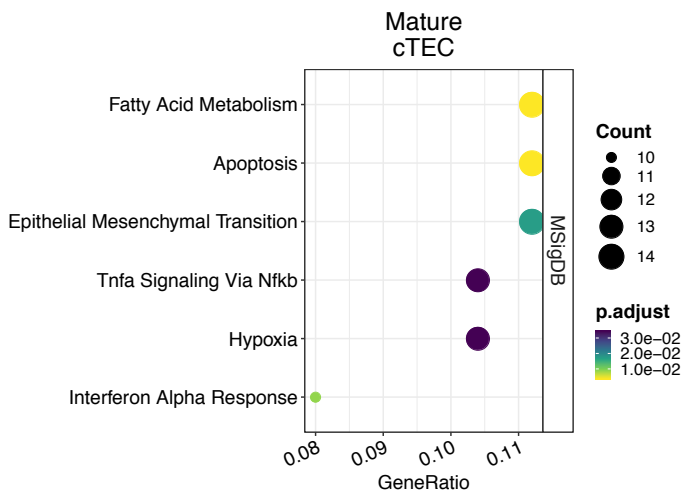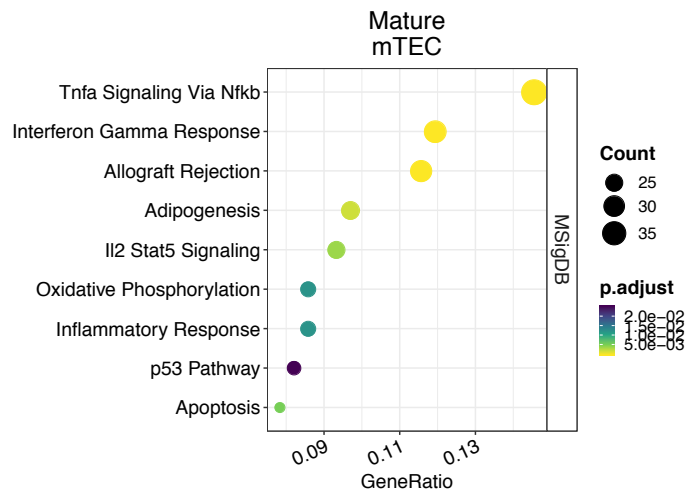

Supplement: supp [file elife-56221-supp-v1.zip › elife_poa_e56221_Figure_2_figure_supplement_5.pdf]

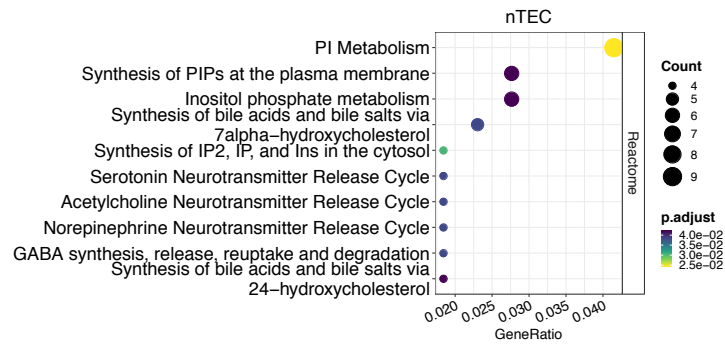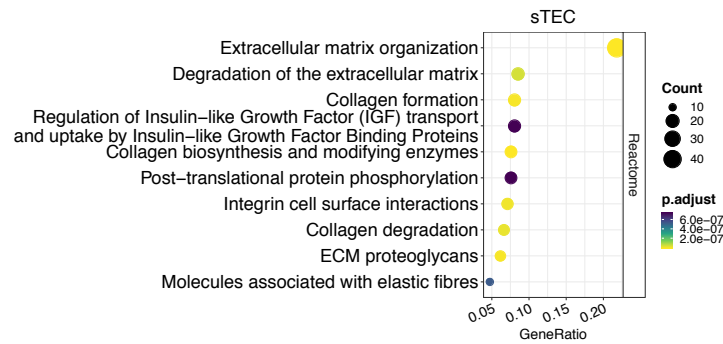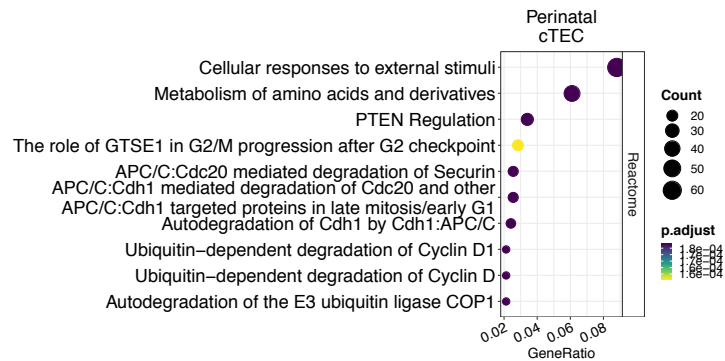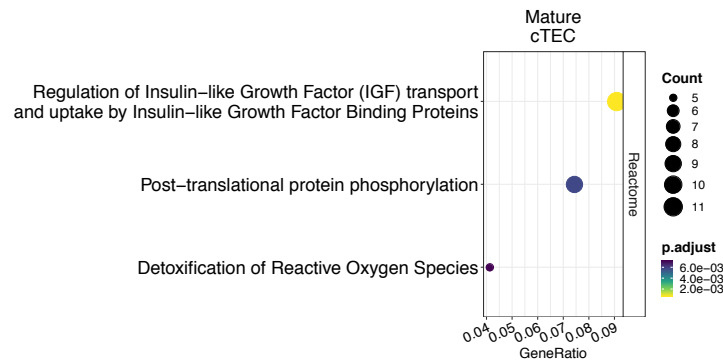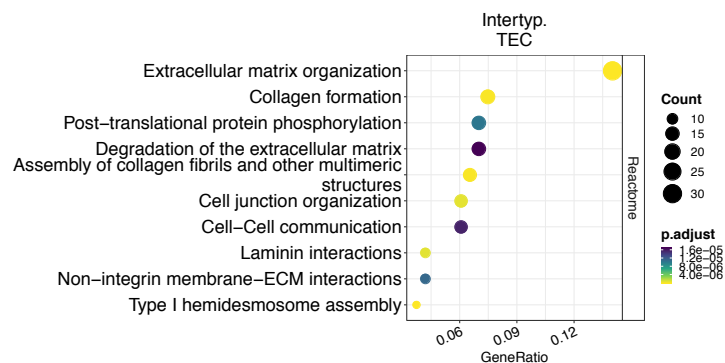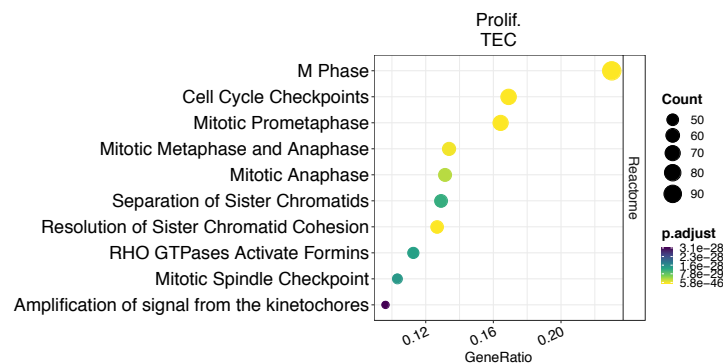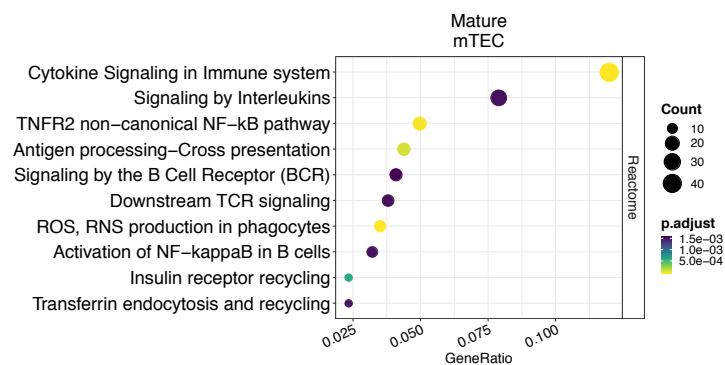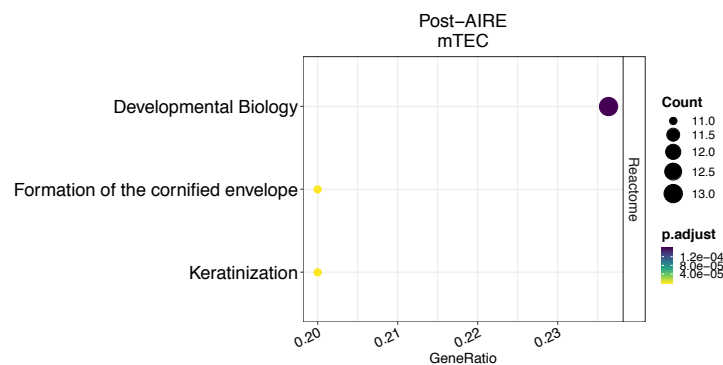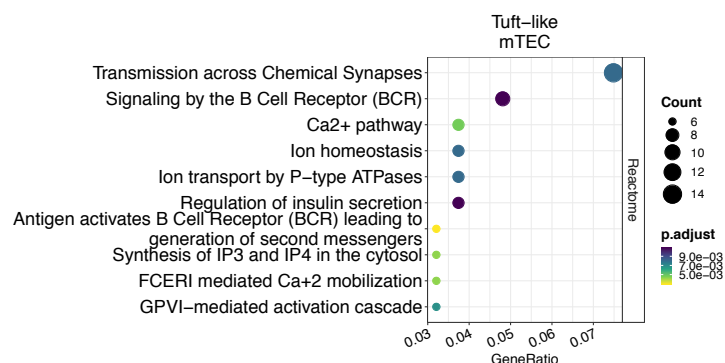

Supplement: supp [file elife-56221-supp-v1.zip › elife_poa_e56221_Figure_2_figure_supplement_6.pdf]

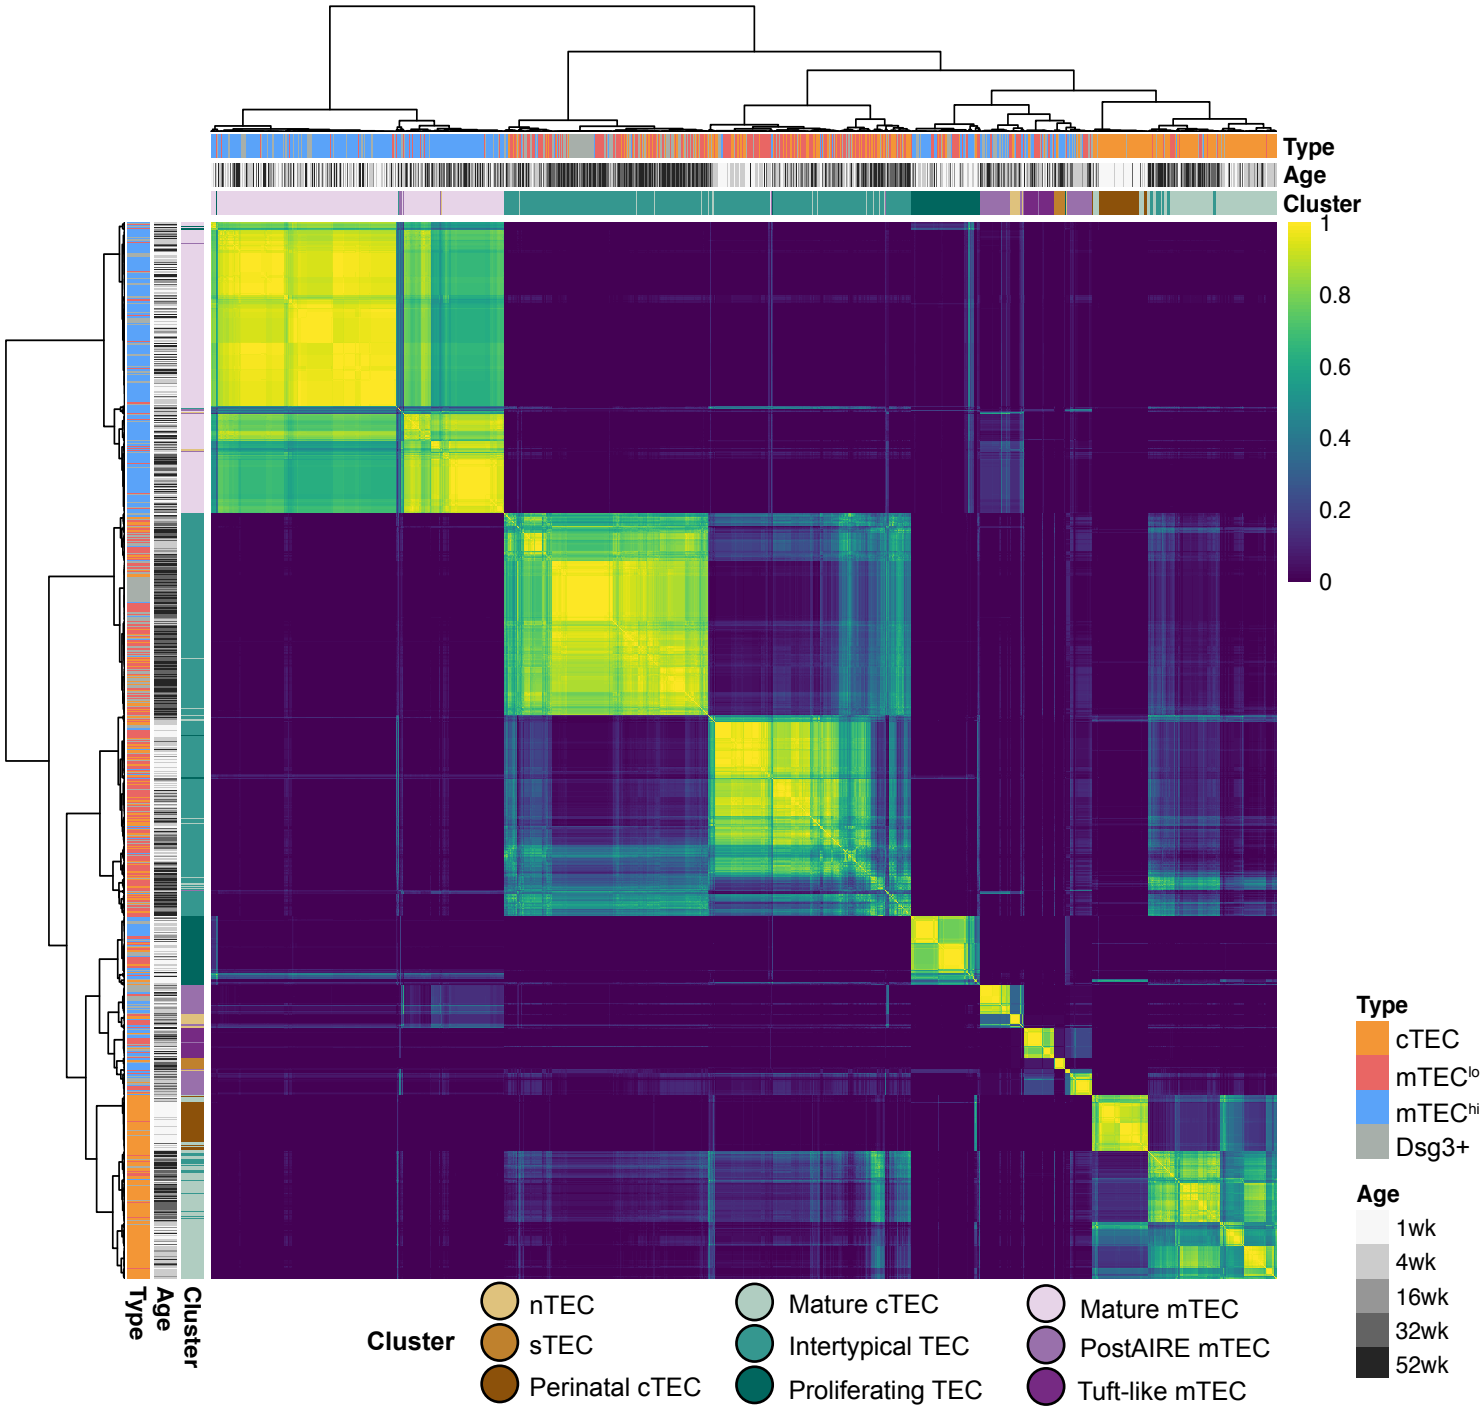

Supplement: supp [file elife-56221-supp-v1.zip › elife_poa_e56221_Figure_2_figure_supplement_7.pdf]

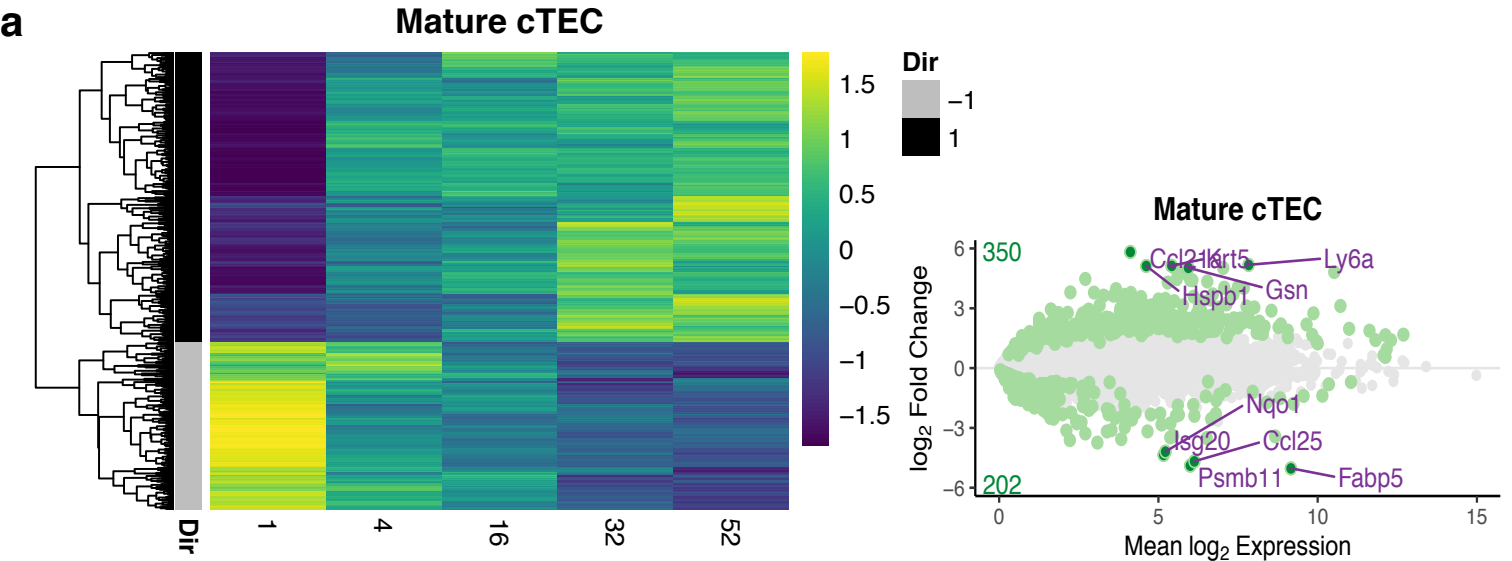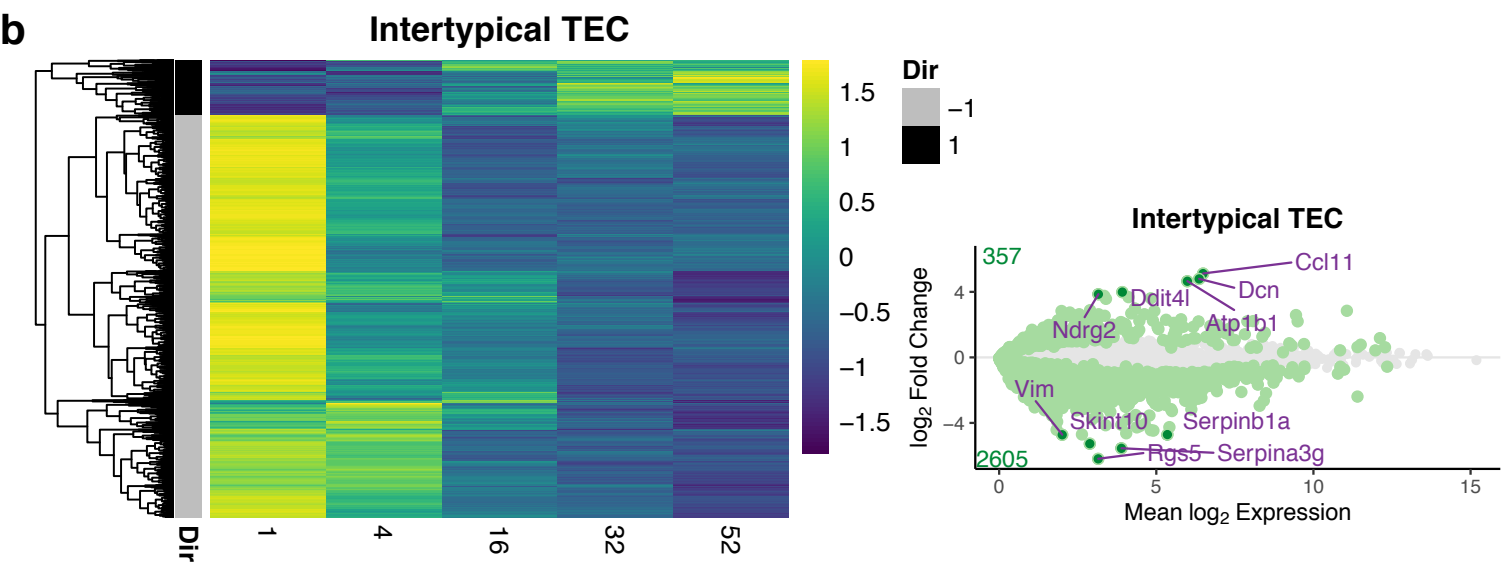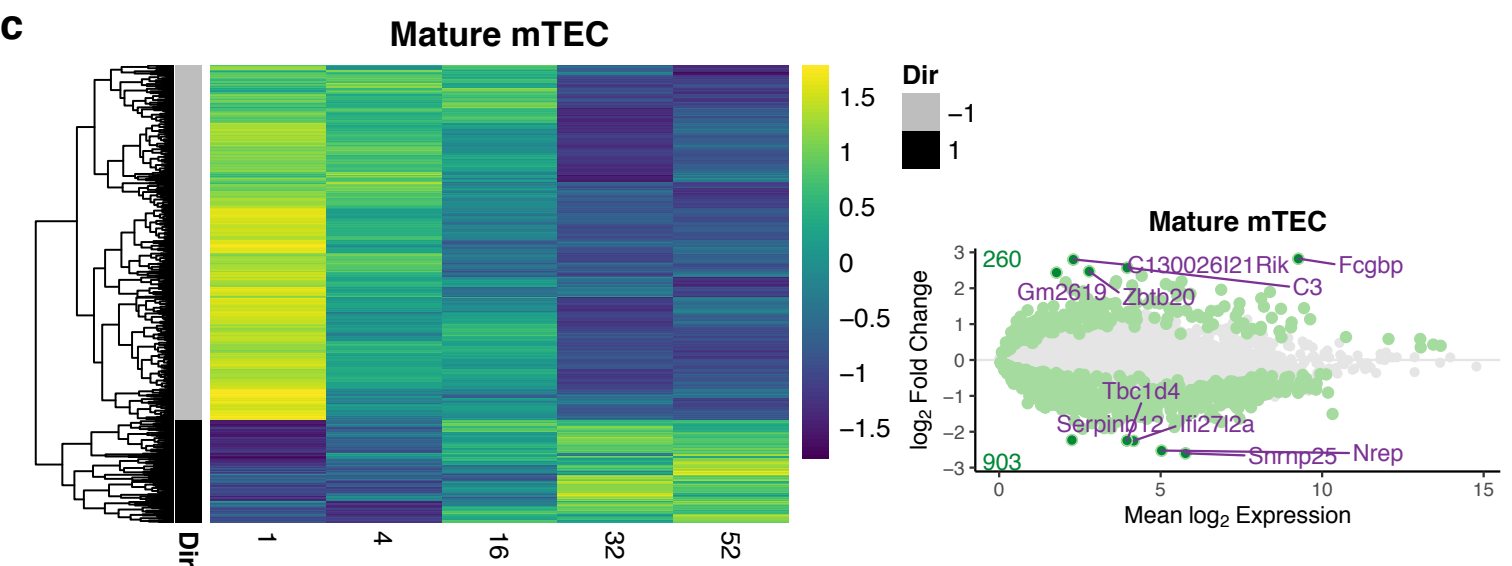

Supplement: supp [file elife-56221-supp-v1.zip › elife_poa_e56221_Figure_3_figure_supplement_1.pdf]

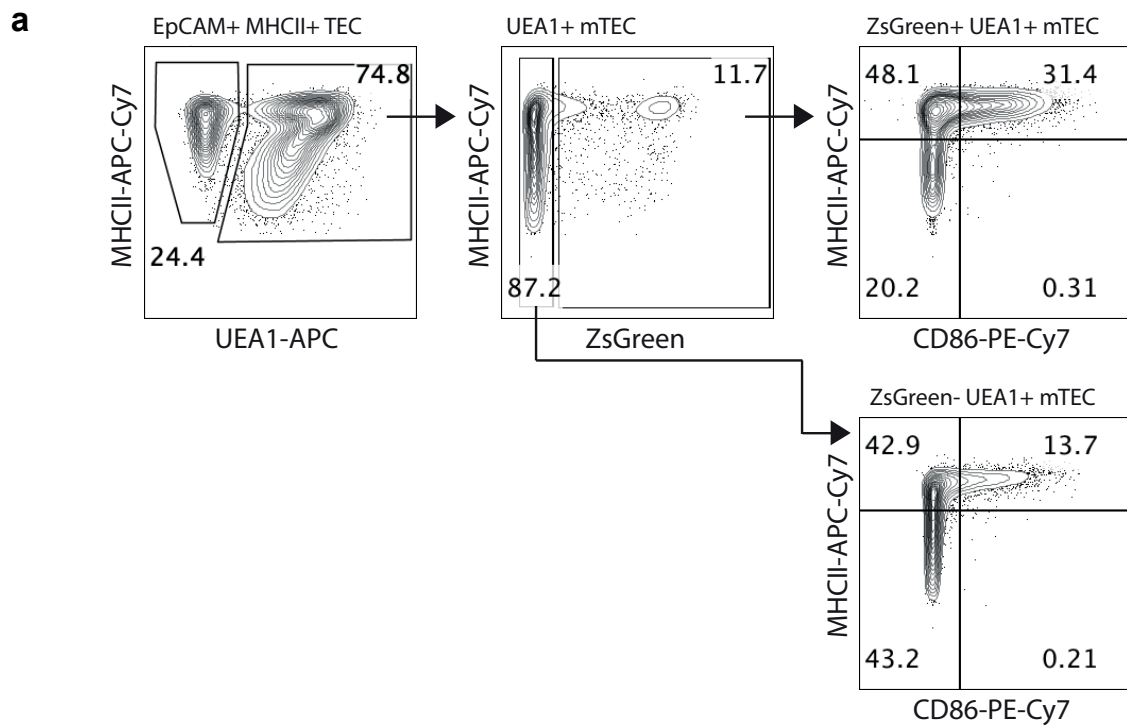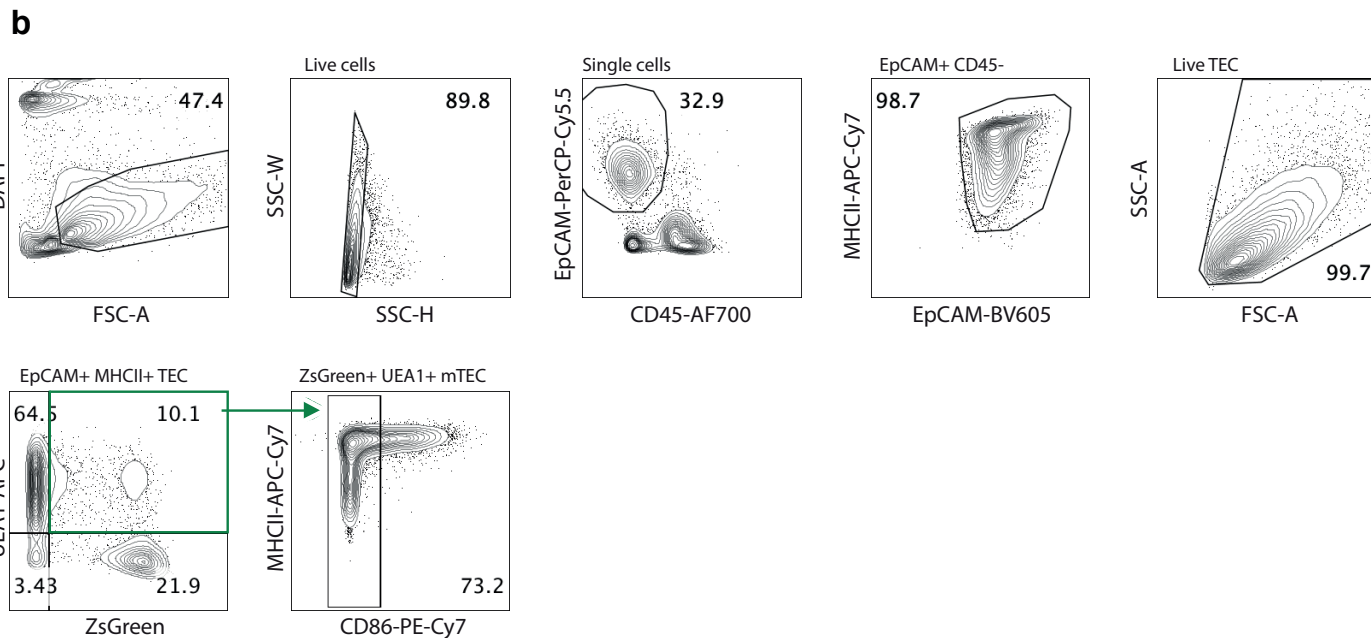

Supplement: supp [file elife-56221-supp-v1.zip › elife_poa_e56221_Figure_5_figure_supplement_1.pdf]

**a**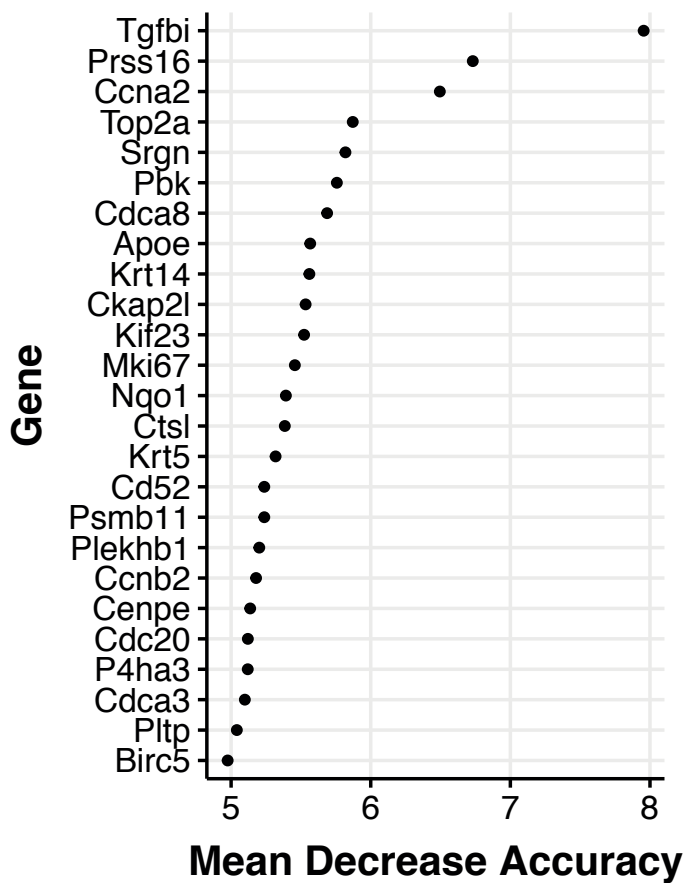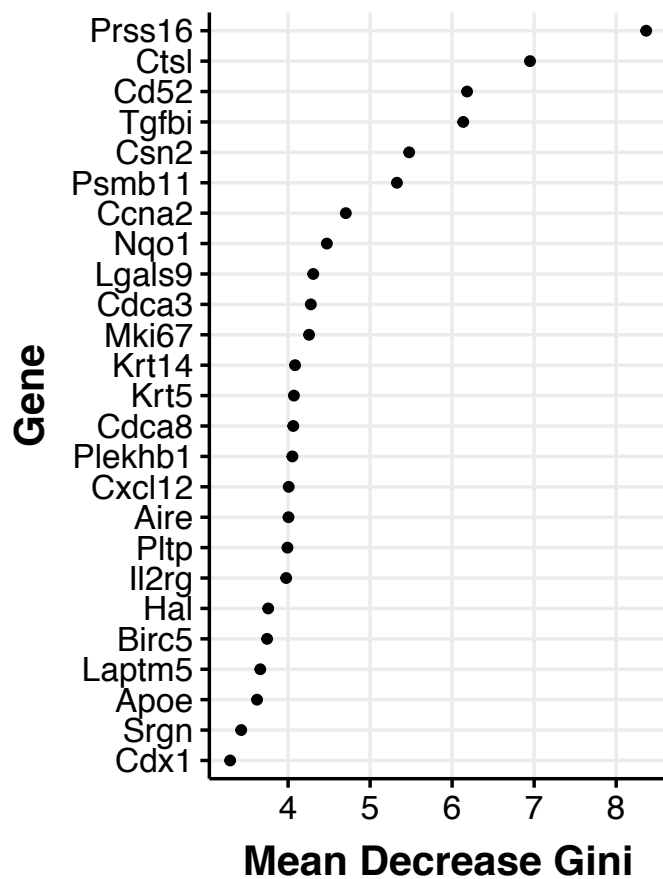**b**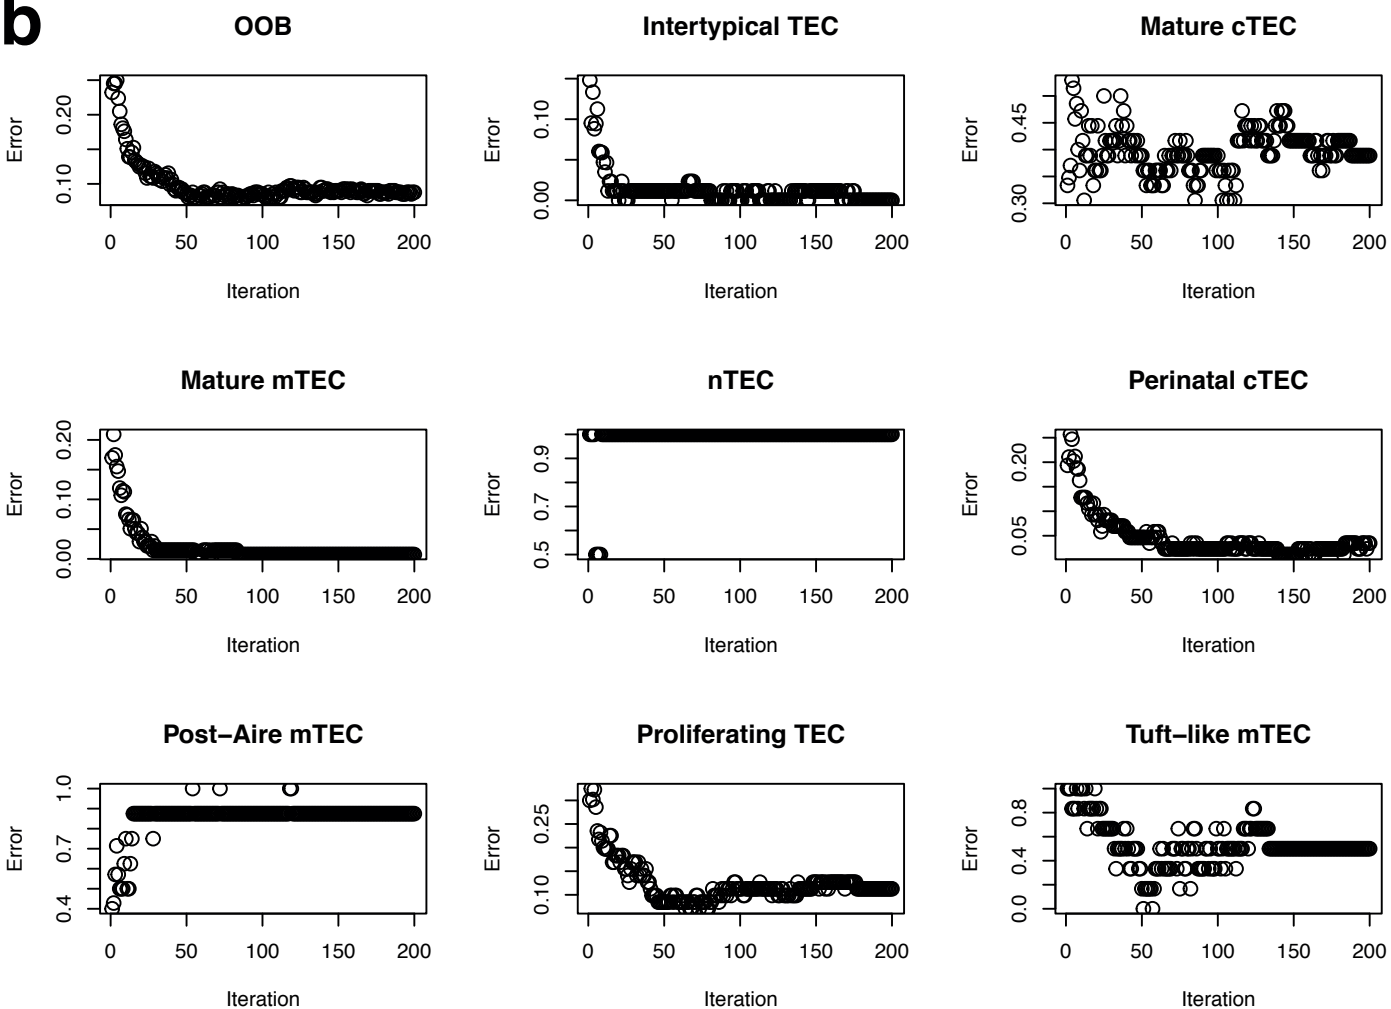

Supplement: supp [file elife-56221-supp-v1.zip › elife_poa_e56221_Figure_5_figure_supplement_2.pdf]

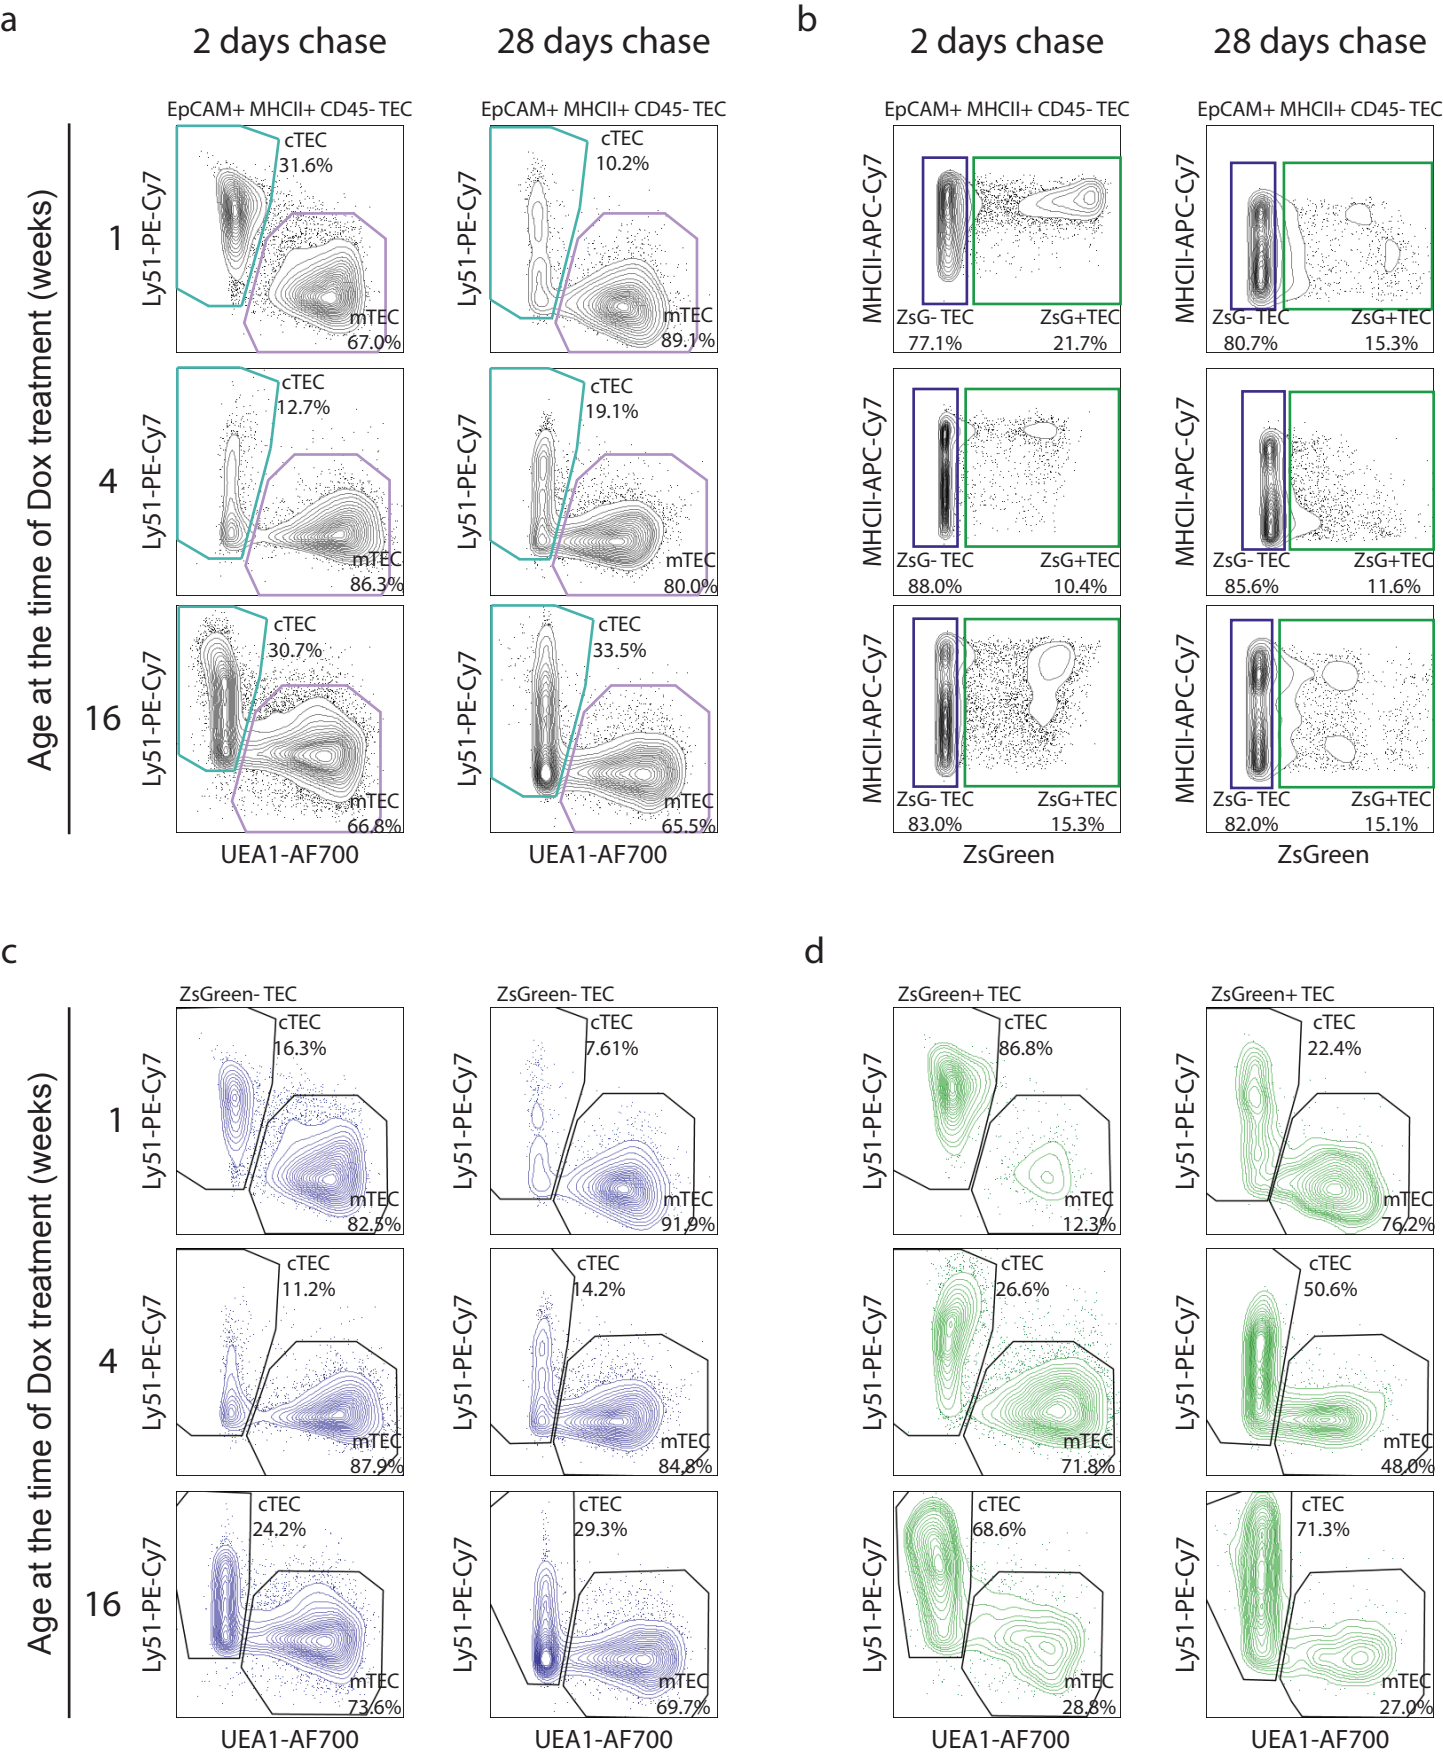

Supplement: supp [file elife-56221-supp-v1.zip › elife_poa_e56221_Figure_6_figure_supplement_1.pdf]

**a**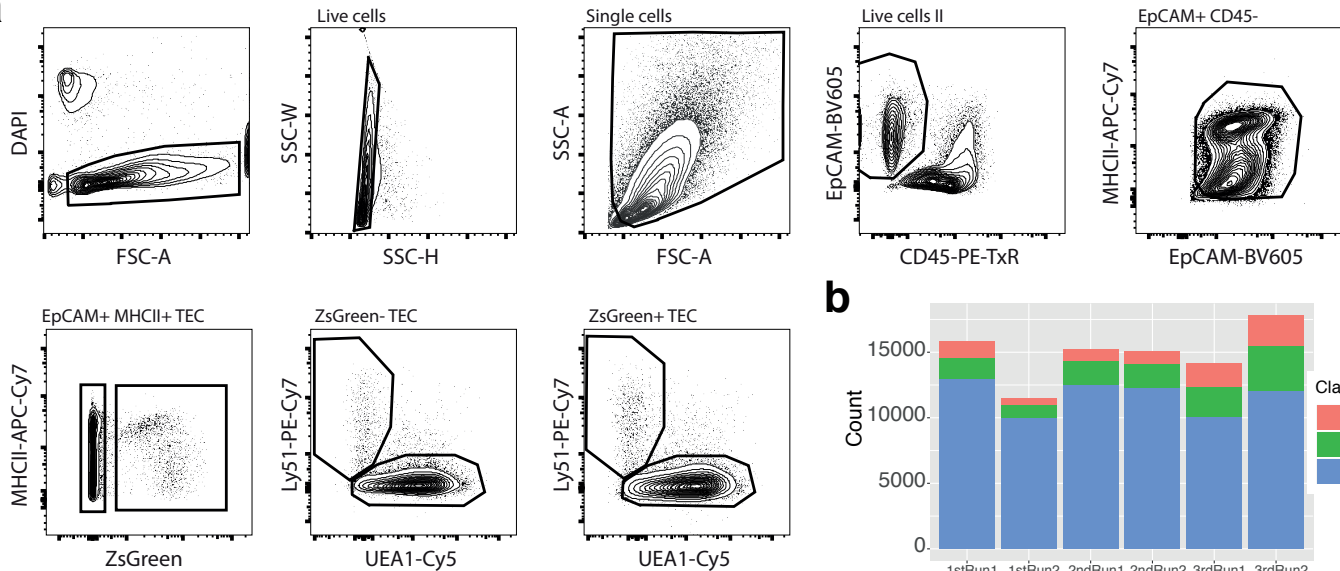**b**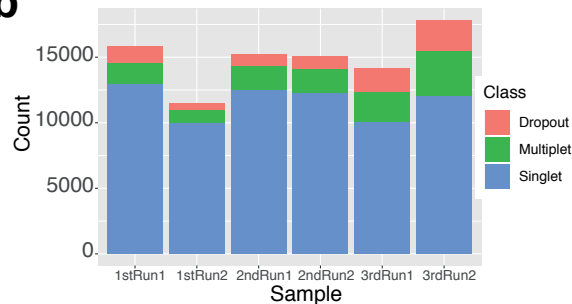**c**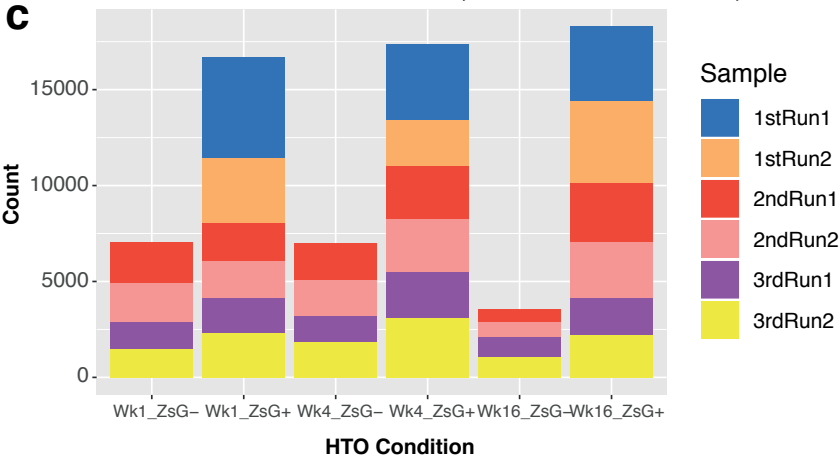

Supplement: supp [file elife-56221-supp-v1.zip › elife_poa_e56221_Figure_6_figure_supplement_2.pdf]

**a**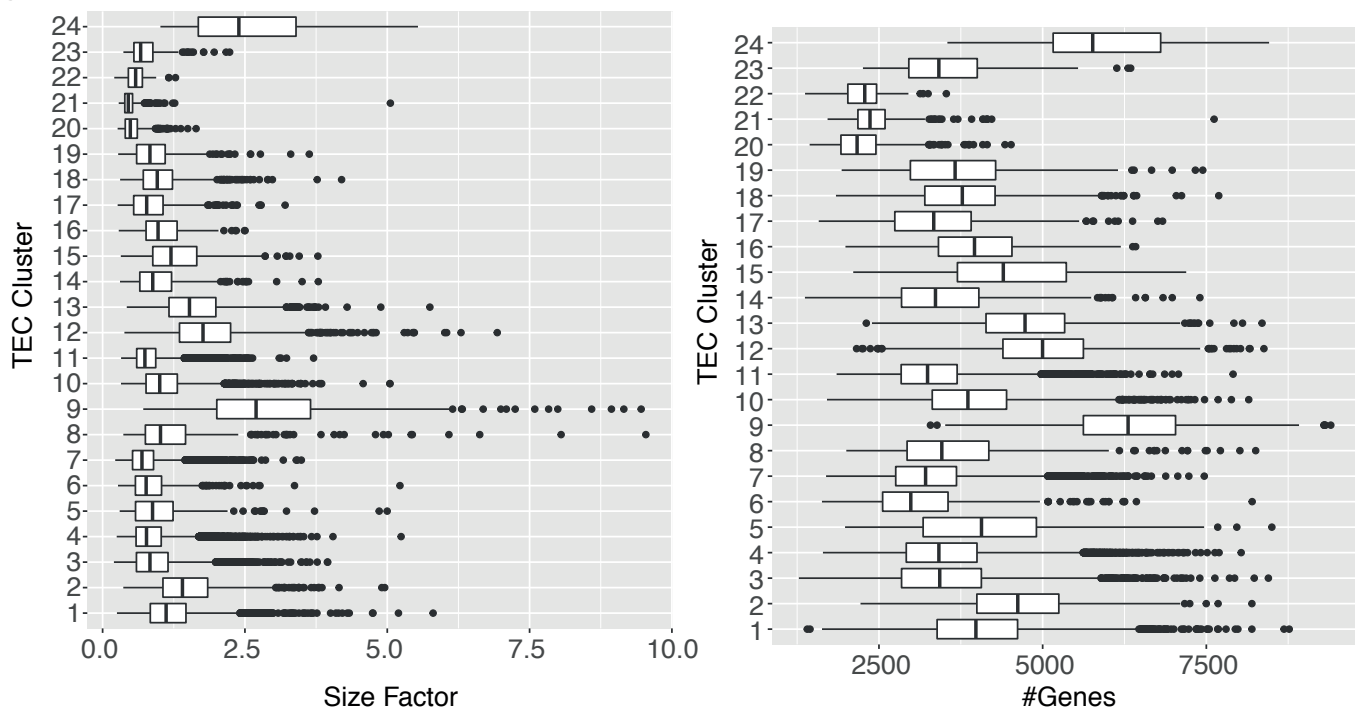**b**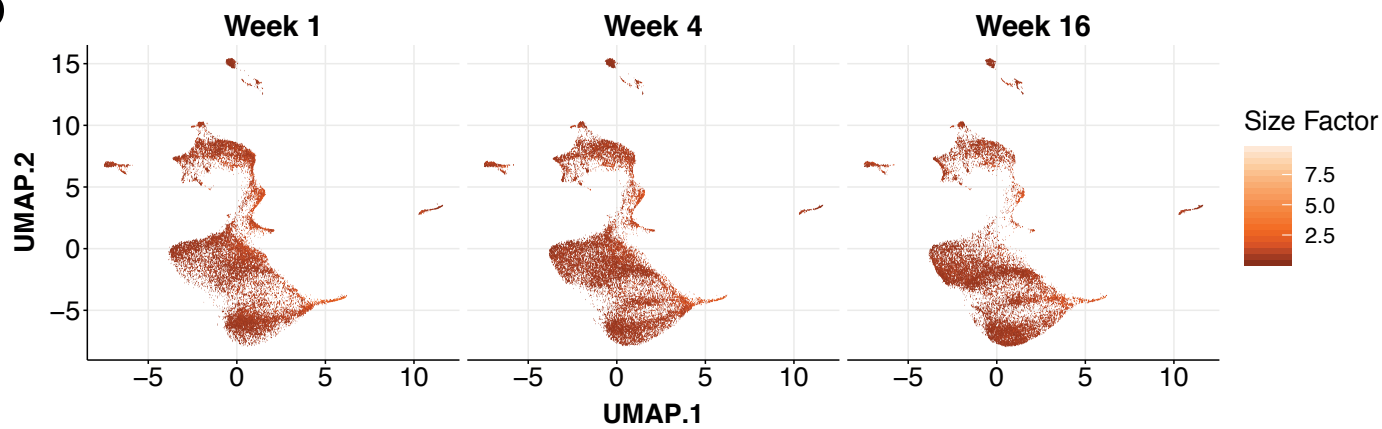**c**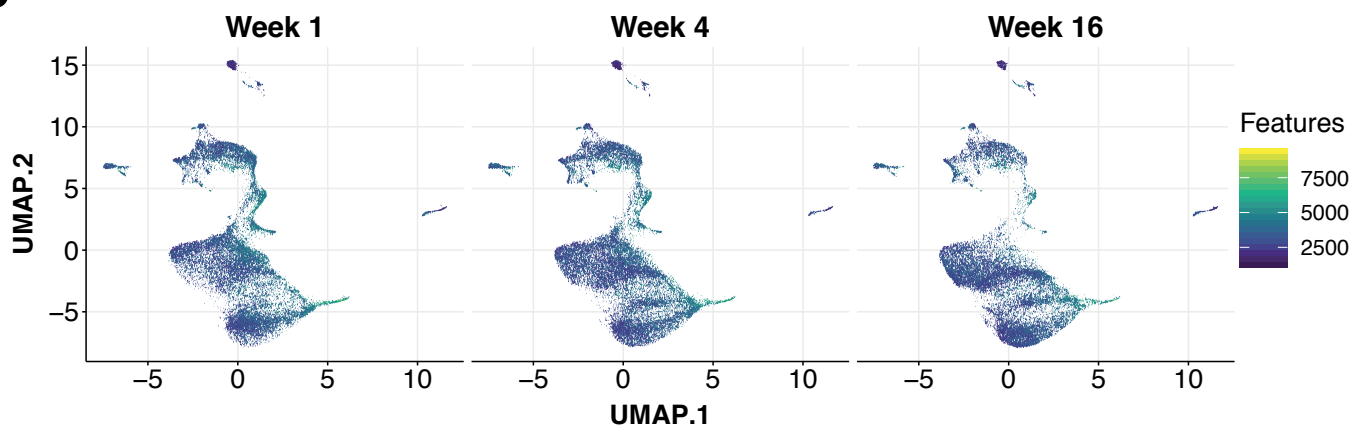

Supplement: supp [file elife-56221-supp-v1.zip › elife_poa_e56221_Figure_6_figure_supplement_3.pdf]

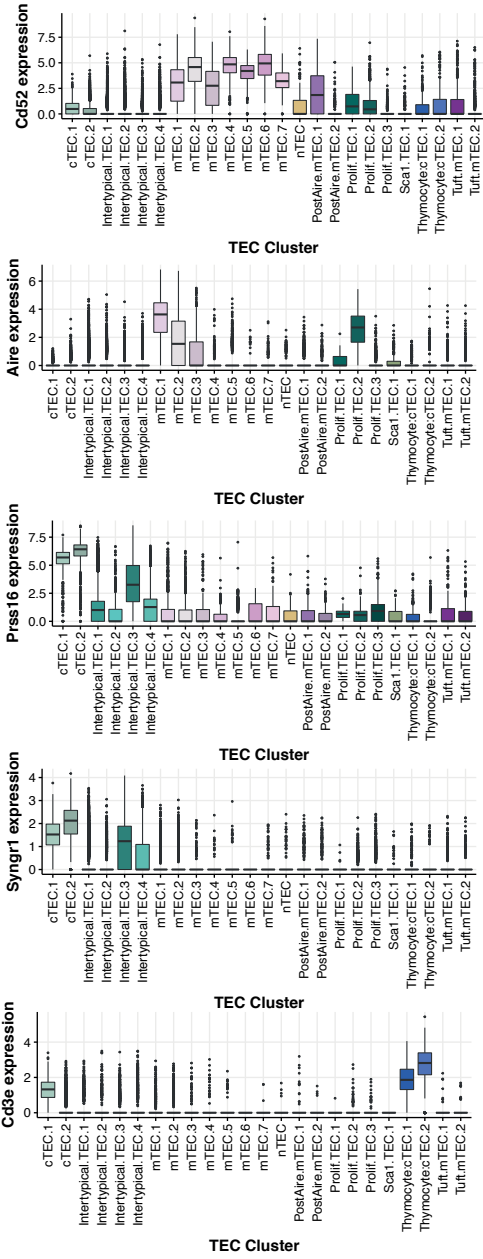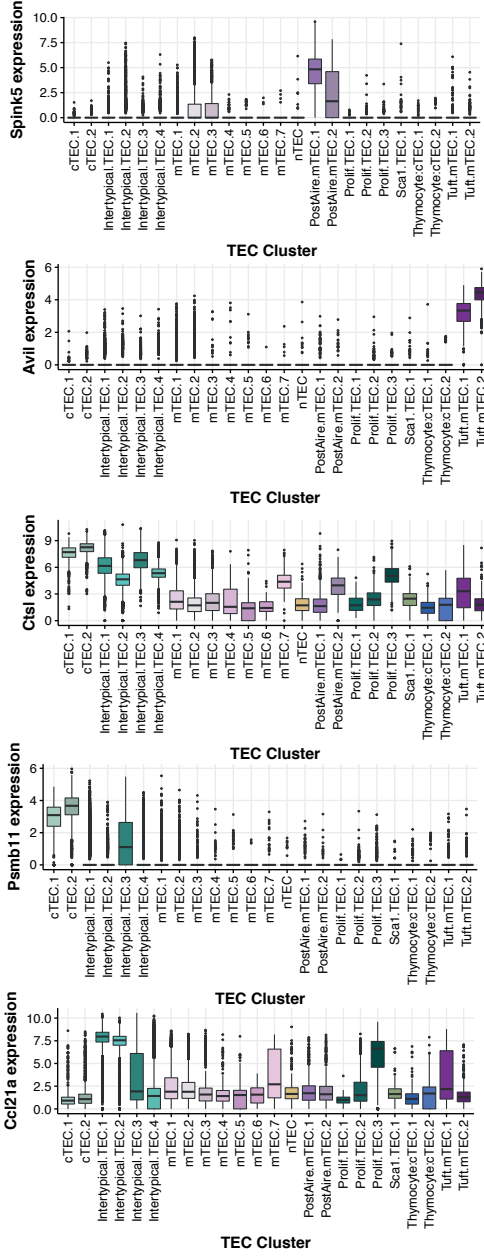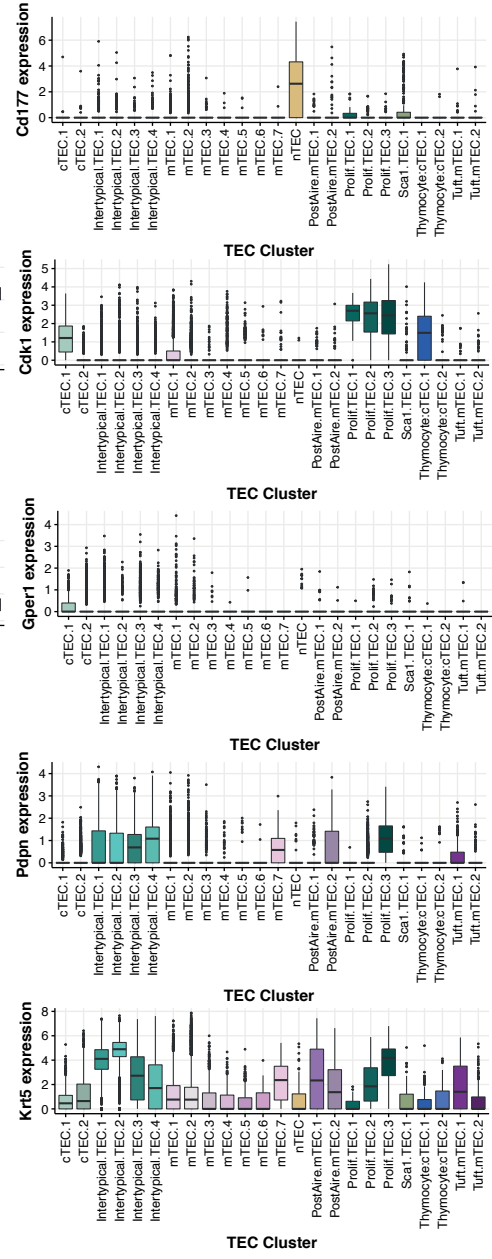

Supplement: supp [file elife-56221-supp-v1.zip › elife_poa_e56221_Figure_6_figure_supplement_5.pdf]

UMAP.2

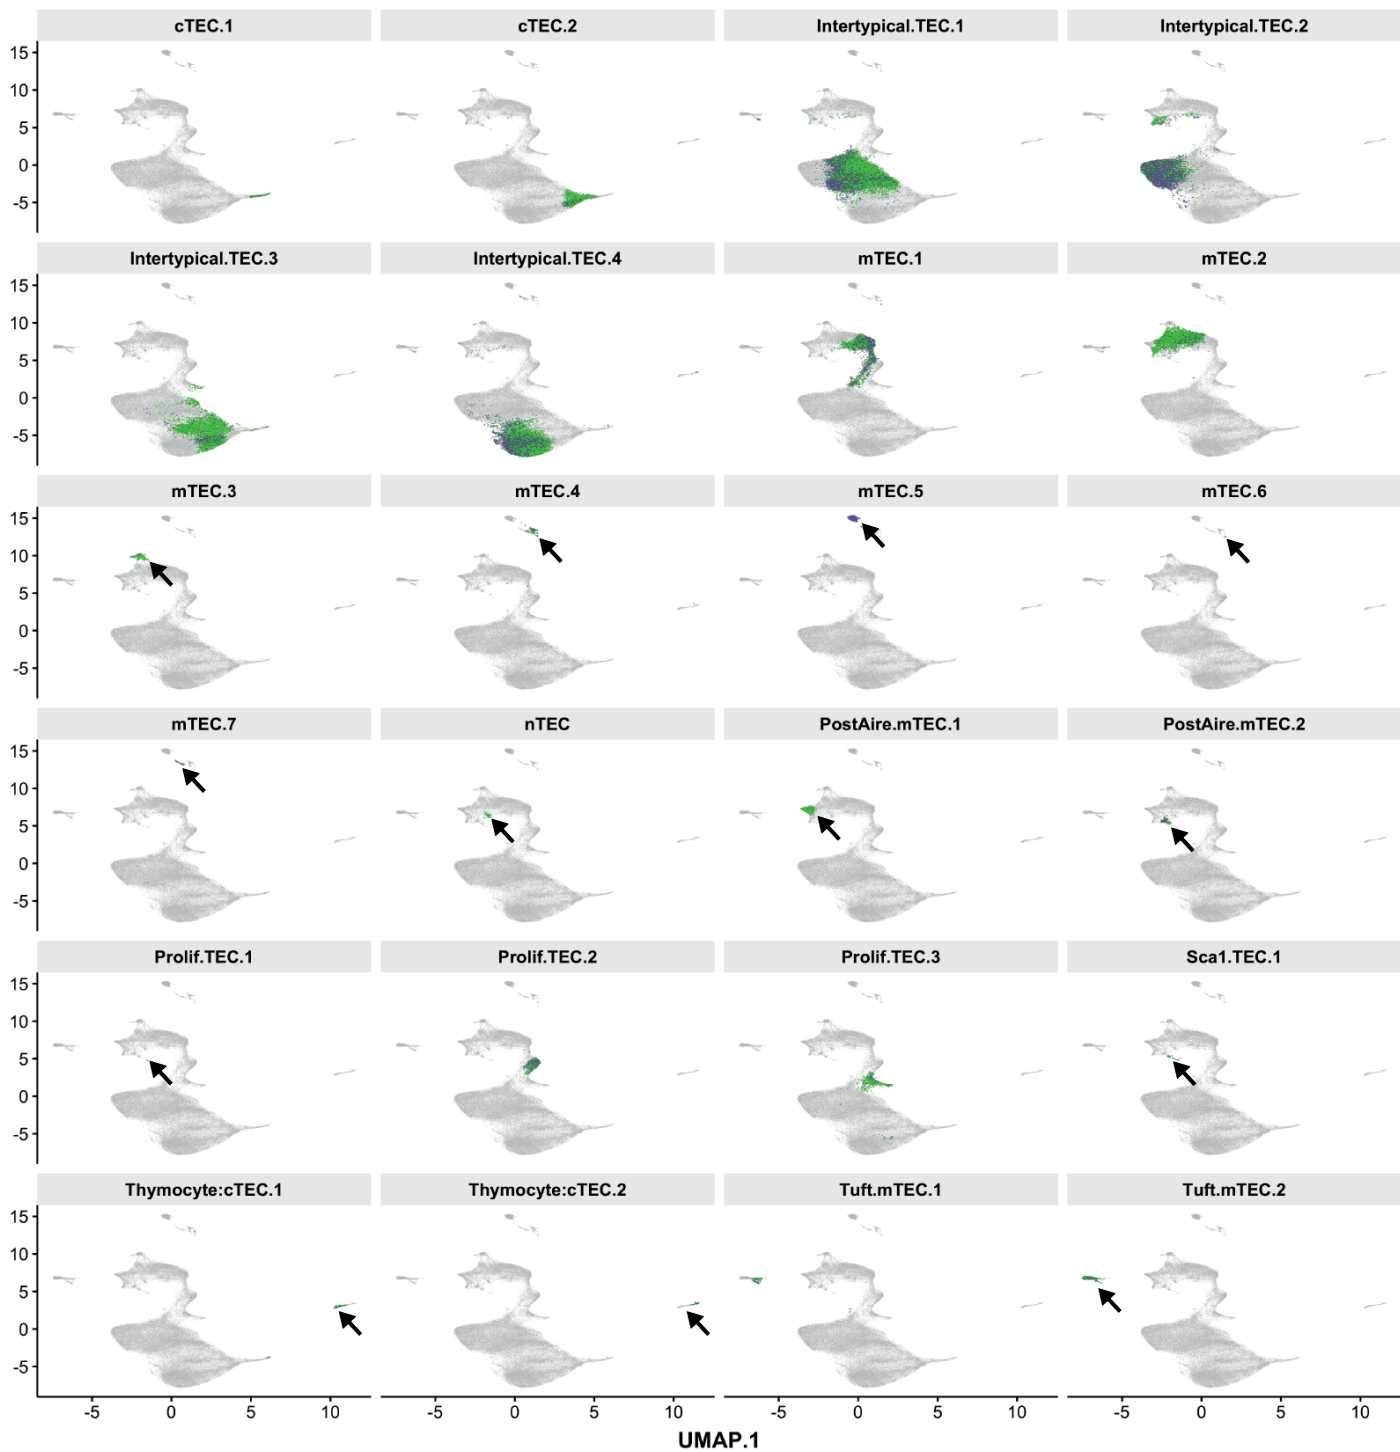

SortFactor • ZsGreen- • ZsGreen+

Supplement: supp [file elife-56221-supp-v1.zip › elife_poa_e56221_Figure_6_figure_supplement_6.pdf]

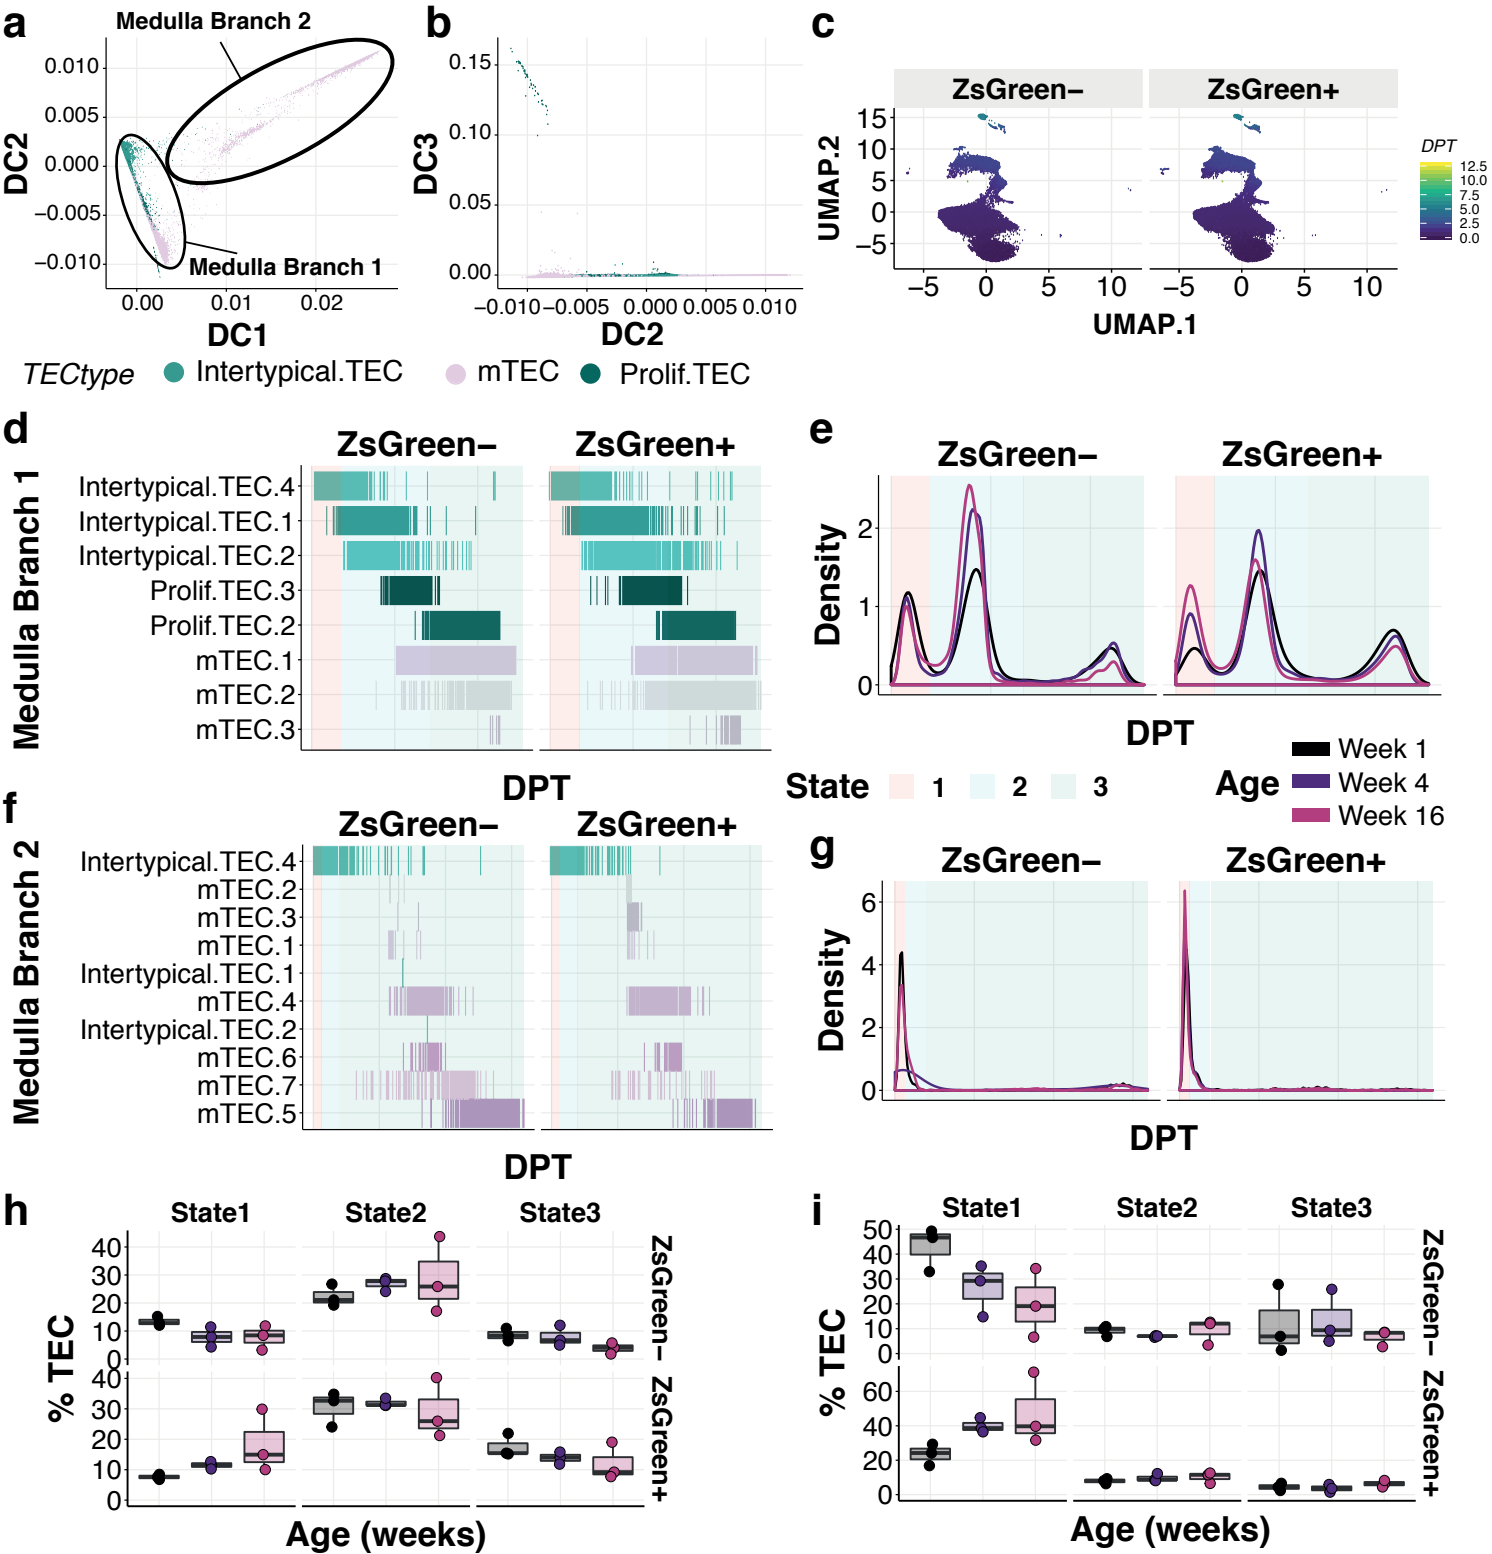

Supplement: supp [file elife-56221-supp-v1.zip › elife_poa_e56221_Figure_7_figure_supplement_1.pdf]

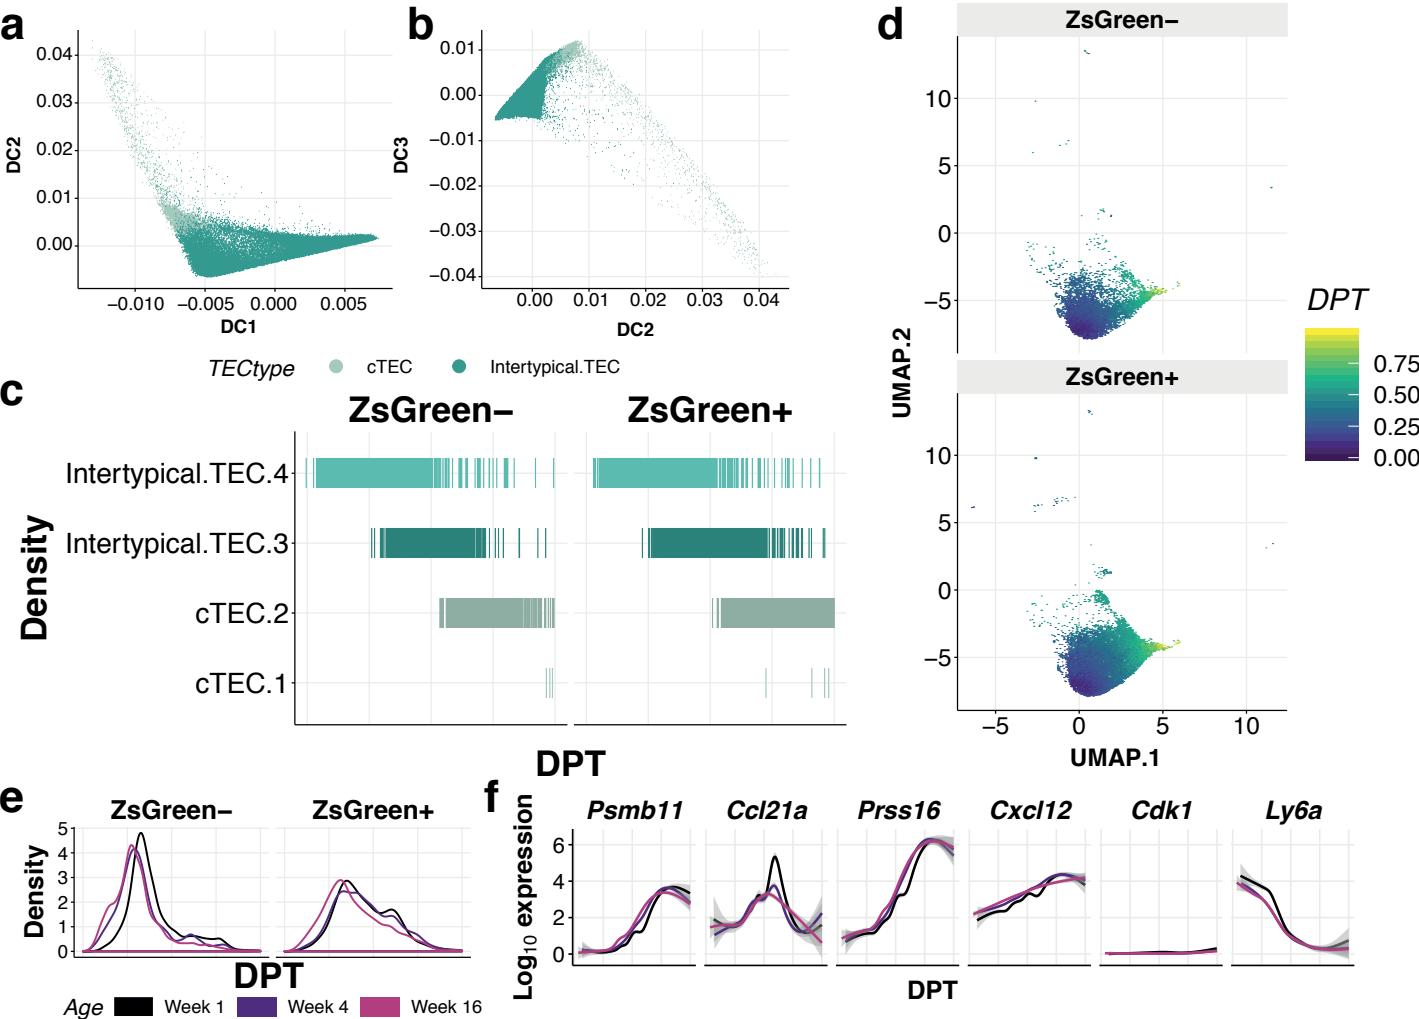

Supplement: supp [file elife-56221-supp-v1.zip › elife_poa_e56221_Figure_7_figure_supplement_2.pdf]

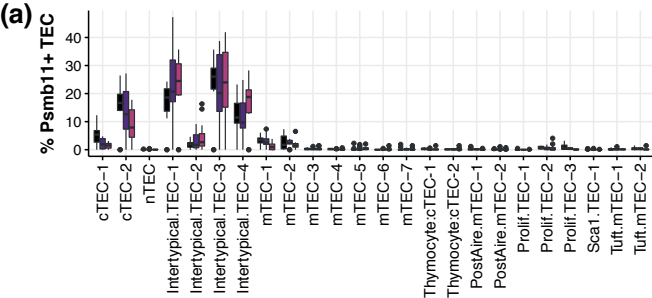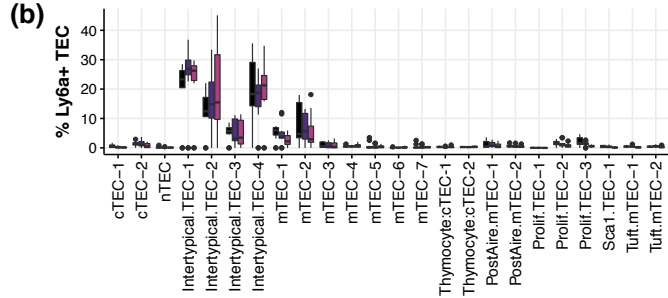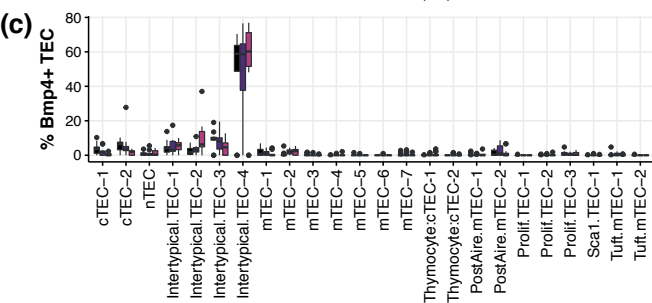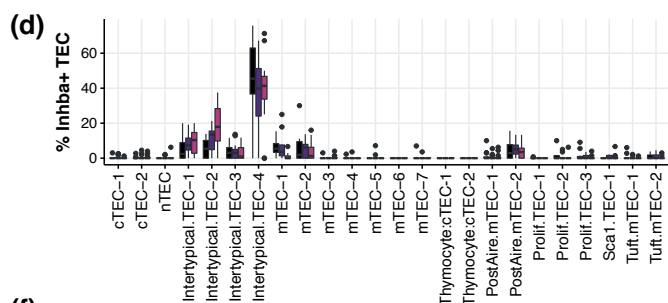

Age

Wk1

Wk4

Wk16

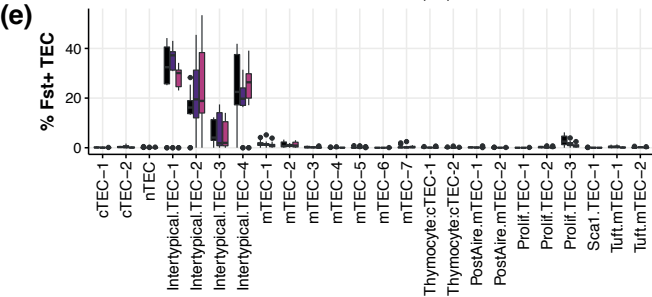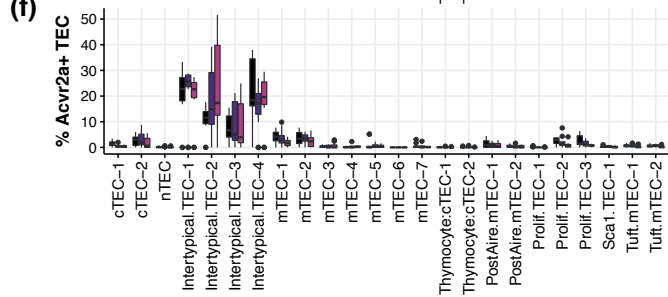

TEC subtype

Supplement: supp [file elife-56221-supp-v1.zip › elife_poa_e56221_Figure_7_figure_supplement_3.pdf]
